# Supplementary material for: Dynamical Correlations Reveal Allosteric Sites in G Protein-Coupled Receptors
Source: MDPI journal article supplement (doi:10.3390/ijms22010187), 2020-12-27
Supplement: s1 [file s1]

# Dynamical Correlations Reveal Allosteric Sites in G Protein-Coupled Receptors

Pedro Renault and Jesús Giraldo

## Supporting Information

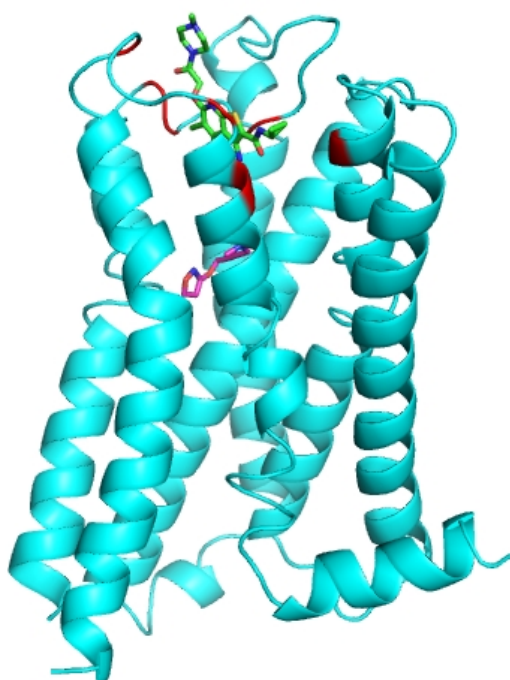

**Figure S1.** The M2 muscarinic receptor bound to the agonist iperoxo (purple sticks) and the allosteric modulator LY2119620 (green sticks) (PDB code 4MQT). Residues within 5 Å of the allosteric modulator are highlighted in red.

**Table S1.** PDB codes of structures in the experimental ensemble of  $\beta$ 2AR

| Inactive                                                                                                                                                      | Active                                                                                  |
|---------------------------------------------------------------------------------------------------------------------------------------------------------------|-----------------------------------------------------------------------------------------|
| 2RH1 [31], 3D4S [56], 3NY8, 3NY9, 3NYA [75], 3PDS [76], 4GBR [77], 5D5A, 5D5B [78], 5D6L [79], 5JQH [80], 6PRZ, 6PS0, 6PS1, 6PS2, 6PS3, 6PS4, 6PS5, 6PS6 [81] | 3POG [82], 3SN6 [83], 4LDE, 4LDL, 4LDO [32], 4QKX [84], 6E67 [85], 6MXT [86], 6NI3 [87] |

Numbers in brackets refer to the references in the main text.

**Table S2.** Residues in  $\beta$ 2AR sites

| Site | Residues                                                                                                               |
|------|------------------------------------------------------------------------------------------------------------------------|
| 1    | M40, I43, H93, I94, K97, M98, K305, E306, I309, L310, W313                                                             |
| 2    | I43, A46, I47, G50, L53, V54, V317, G320, F321, P323, L324, C327, F336                                                 |
| 3    | M215, V216, Y219, S220, F223, G276, M279, G280, T283                                                                   |
| 4    | L64, T66, V67, T68, N69, I72, R131, Y141, Q142, S143, K147, R228, K270, A271, T274, L275, Y326, R328, S329, D331, F332 |
| 5    | T164, P168, W173, Y199, A202, S203, V206                                                                               |
| 6    | I121, E122, C125, V126, M156, V157, V160, V206, V210, P211                                                             |
| 7    | F71, V126, I127, V129, D130, R131, Y132, F133, A134, T136, S137, Q142, S143, L144, L145, V152                          |
| 8    | I55, I58, A59, L64, Q65, T66, N69, Y70, T73, S74, C77, R151, I154                                                      |
| 9    | A176, H178, E180, D192, F193, F194, T195, N196, Q197, H296, D300, N301, I303, R304, K305                               |

Site 1

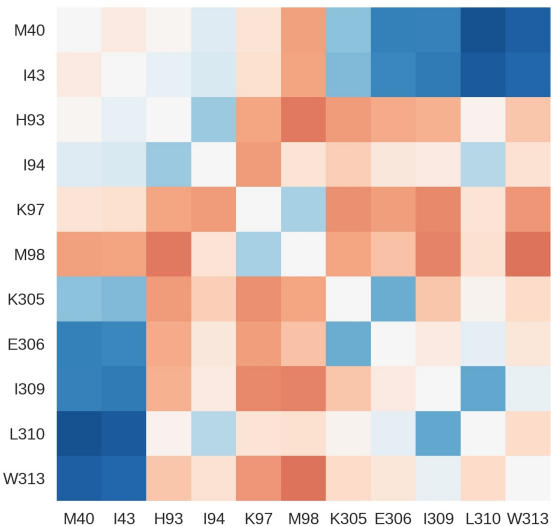

Site 2

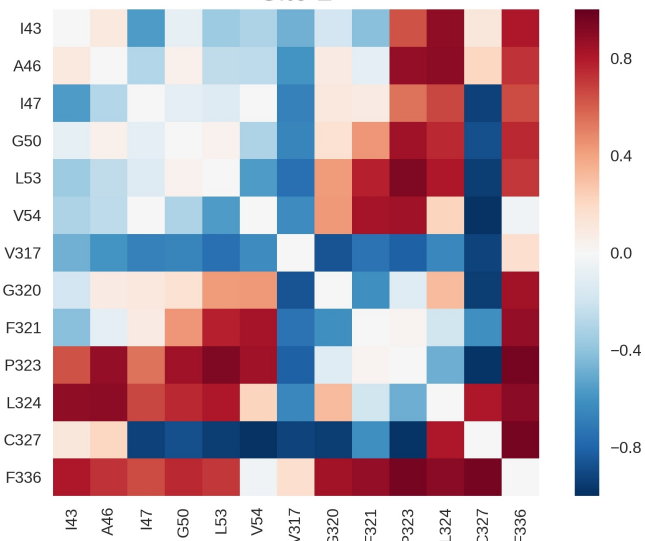

Site 3

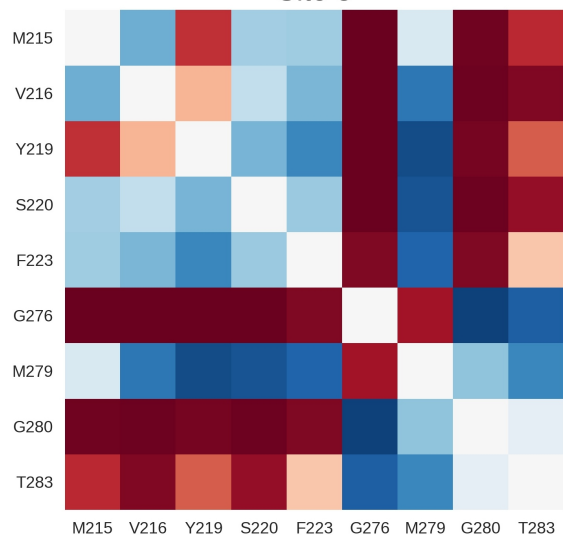

Site 5

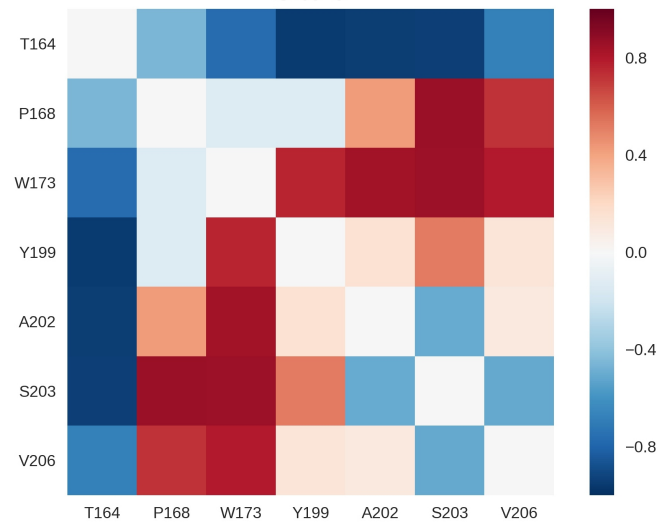

Site 8

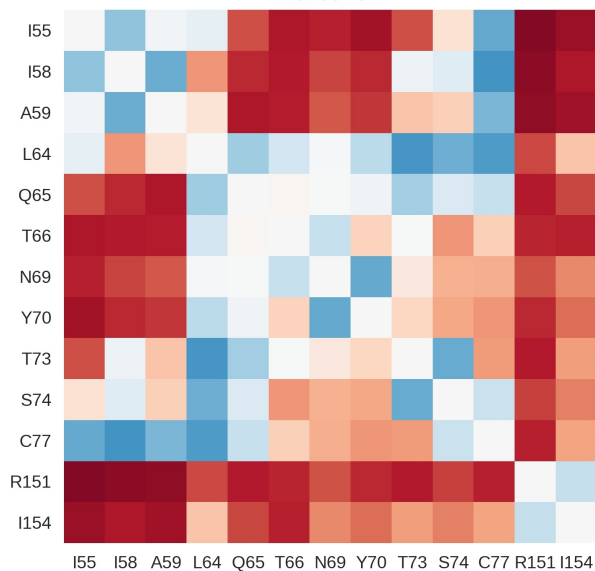

Site 9

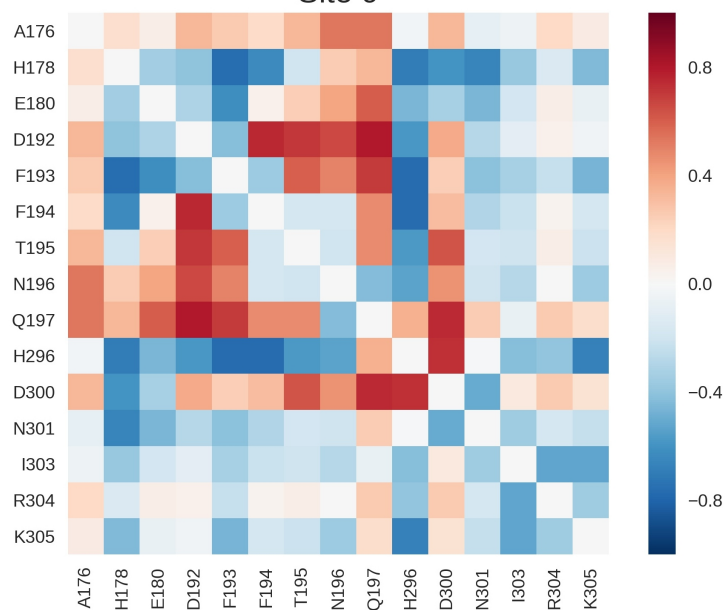

**Figure S2. Matrices of correlations between inter-residue distances and  $\Delta$  for sites in the  $\beta$ 2AR.** Each element  $c_{ij}$  in these matrices is the correlation coefficient between  $\Delta$  and the distance between residues  $i$  and  $j$ . Strong anti-correlations are in blue, intermediate values in white and strong correlations in red.

**Table S3.** Ranking of  $\beta$ 2AR sites based on the strength of their coupling to  $\Delta$ , obtained from NMA of the inactive conformation

| Site Label Coupling with $\Delta$ ( $C_{\text{site}}$ ) |             |
|---------------------------------------------------------|-------------|
| <b>4*</b>                                               | <b>0.22</b> |
| <b>8</b>                                                | <b>0.18</b> |
| <b>3</b>                                                | <b>0.16</b> |
| 6*                                                      | 0.13        |
| 5                                                       | 0.11        |
| 2                                                       | 0.10        |
| 7*                                                      | 0.10        |
| 1                                                       | 0.09        |
| 9                                                       | 0.08        |

Sites with  $C_{\text{site}}$  above the mean of the ranking are highlighted in bold. Those marked with \* overlap with known allosteric sites

**Table S4.** Ranking of  $\beta$ 2AR sites based on the strength of their coupling to  $\Delta$ , obtained from the concatenation of harmonic trajectories (resulting from NMA) of the inactive and active conformations

| Site Label Coupling with $\Delta$ ( $C_{\text{site}}$ ) |             |
|---------------------------------------------------------|-------------|
| <b>4*</b>                                               | <b>0.79</b> |
| <b>7*</b>                                               | <b>0.67</b> |
| <b>3</b>                                                | <b>0.66</b> |
| <b>9</b>                                                | <b>0.65</b> |
| 5                                                       | 0.59        |
| 6*                                                      | 0.57        |
| 8                                                       | 0.54        |
| 2                                                       | 0.51        |
| 1                                                       | 0.41        |

Sites with  $C_{\text{site}}$  above the mean of the ranking are highlighted in bold. Those marked with \* overlap with known allosteric sites



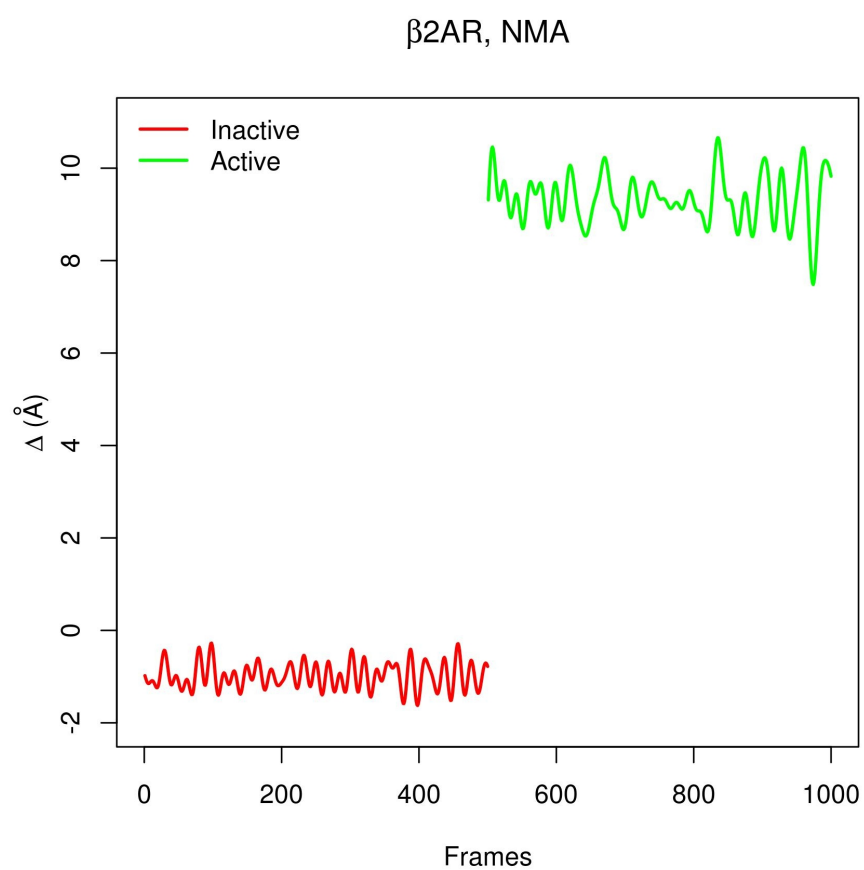

**Figure S3.** Variation of  $\Delta$  in harmonic trajectories (resulting from normal mode analysis) of the  $\beta$ 2AR

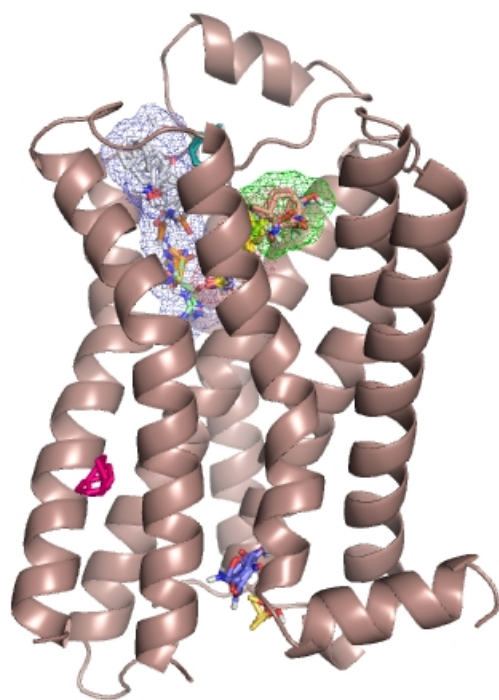

(a)

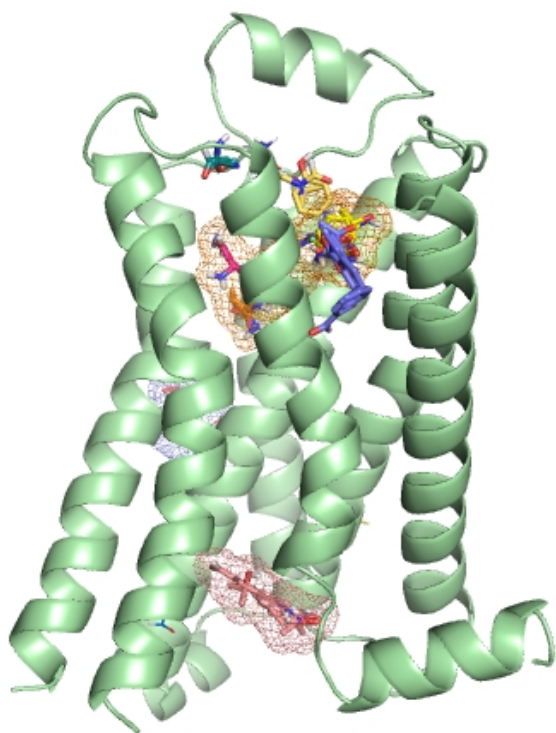

(b)

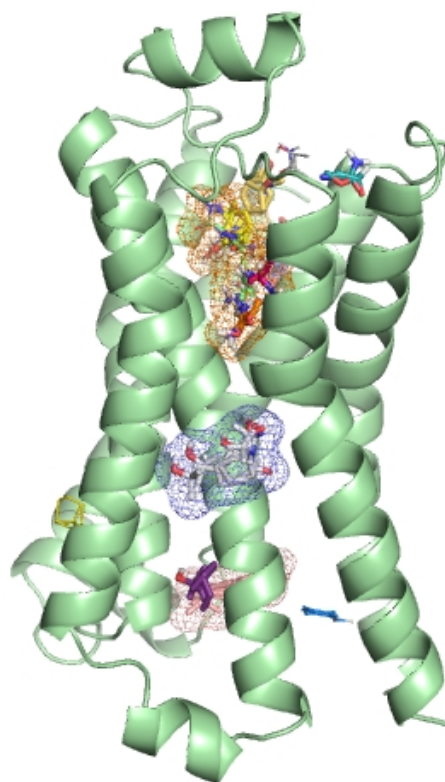

(c)

**Figure S4. FTMap and FTSite results for the  $\beta$ 2AR.** FTMap probes are shown as sticks, and sites detected by FTMap are depicted in mesh representation. The stronger sites have the largest number of probes. A) Inactive conformation (PDB code 2RH1). FTMap identifies a total of 9 sites and the stronger ones are in the region of the orthosteric site. The region of the allosteric site identified by

us as Site 4, that overlaps the G Protein binding site, corresponds to two FTMap sites, one ranked 4<sup>th</sup> (with 13 probes) and the other ranked 9<sup>th</sup> (with 3 probes). B) Active conformation (PDB code 4LDO). FTMap detects 14 sites in this case and the strongest ones are in the orthosteric site, and in the allosteric sites identified in our study as Site 4 (ranked 2<sup>nd</sup>, with 15 bound probes) and Site 6 (ranked 3<sup>rd</sup>, with 13 bound probes). The allosteric site corresponding to our Site 7, close to ICL2, is ranked 10<sup>th</sup> (with 3 bound probes).

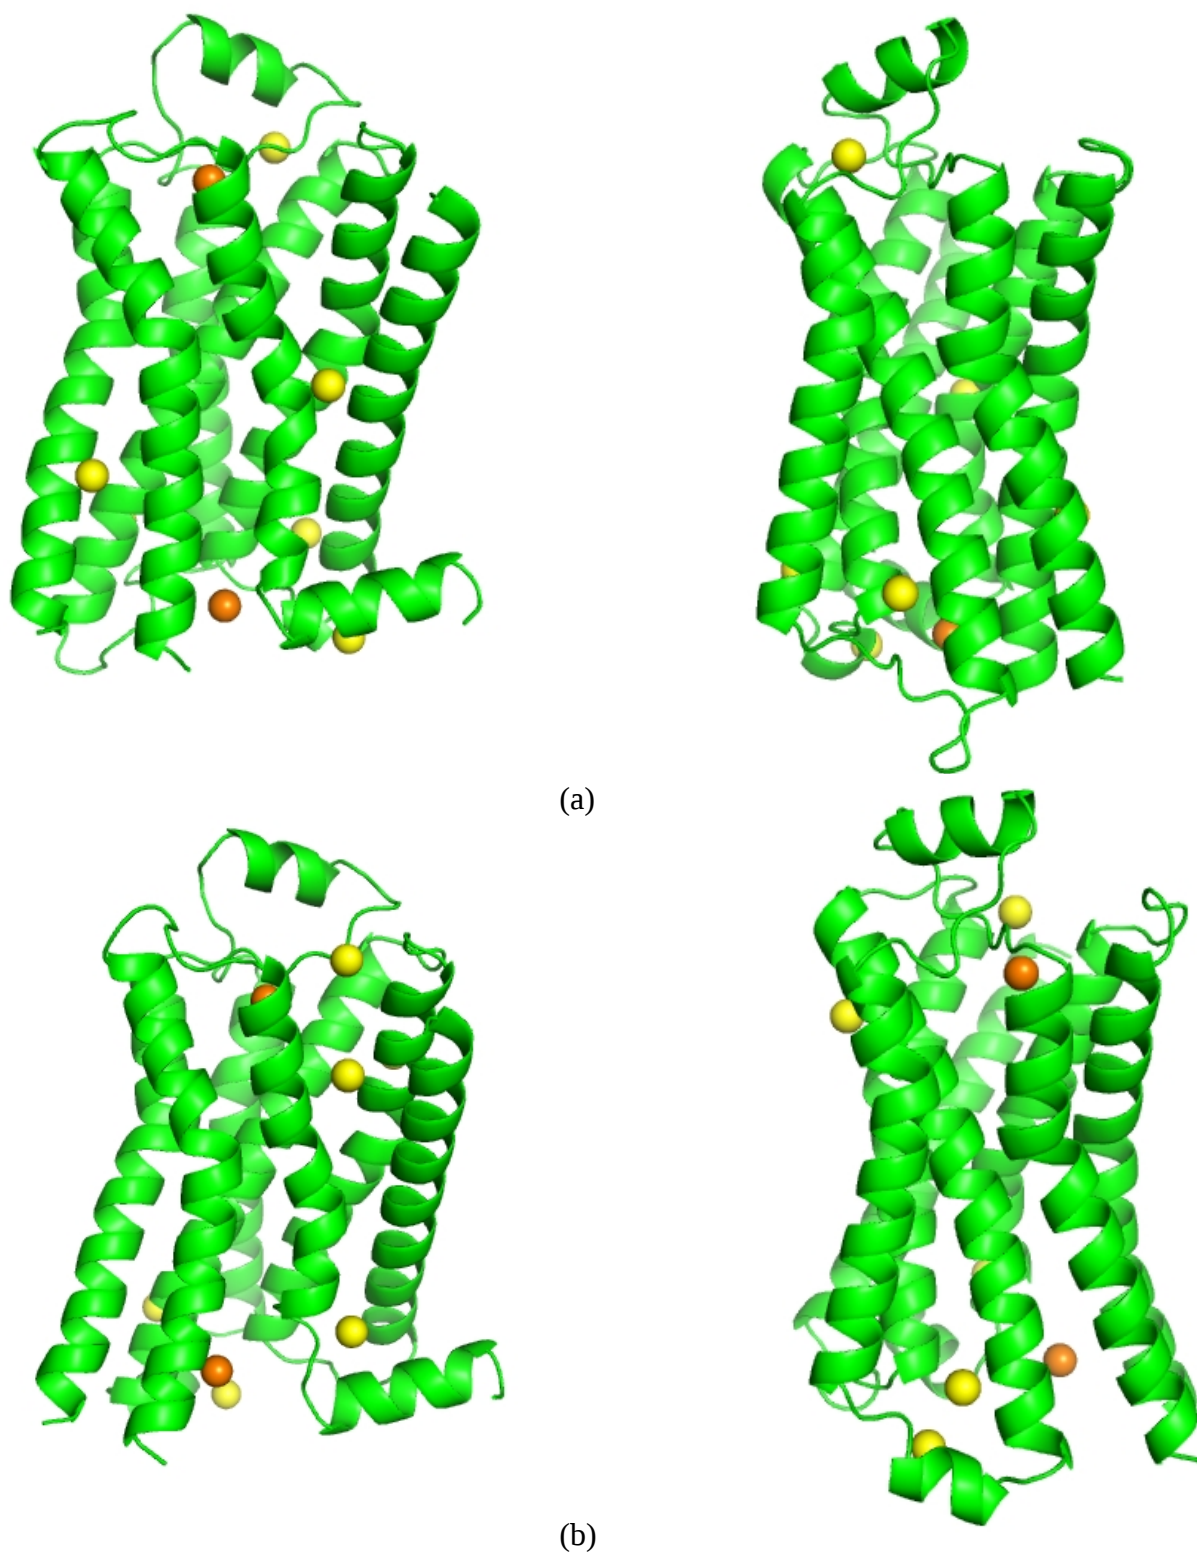

**Figure S5. PARS results for the  $\beta$ 2AR.** PARS calculates p-values for the modified flexibility of

the protein upon perturbation of a site. Only sites resulting in p-values equal or less than 0.05 are considered to significantly alter the overall dynamics. Such sites are indicated by orange spheres, while, yellow spheres denote sites with higher p-values. A) Inactive conformation (PDB code 2RH1). Only cavities close to the orthosteric and G Protein binding sites were considered significant (p-values of 0.00 and 0.05, respectively). For the other cavities, the p-values varied between 0.25 and 0.83. B) Active conformation (PDB code 4LDO). Again, Only cavities close to the orthosteric and G Protein binding sites were considered significant (p-values of 0.03 in both cases). For the other cavities, the p-values varied between 0.15 and 0.72.

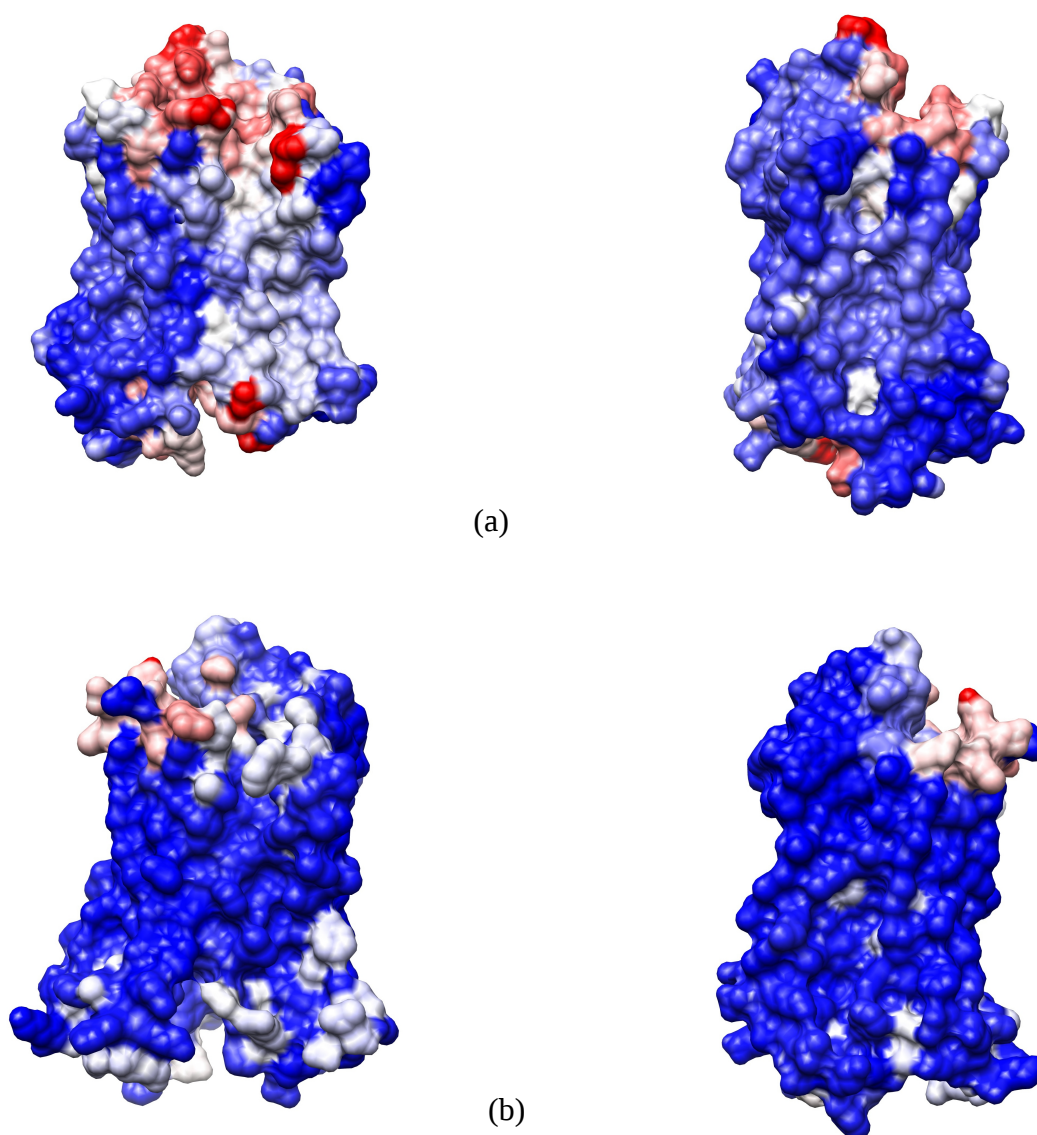

**Figure S6. SPACER results for the  $\beta$ 2AR.** SPACER calculates the binding leverage to measure the coupling of a site to the global dynamics of the protein. The higher the binding leverage, the higher the probability of a site being allosteric. A) Inactive conformation (PDB code 2RH1). B) Active conformation (PDB code 4LDO). High binding leverage is depicted in red, intermediate values in white and low binding leverage is shown in blue. All calculations were performed with a probe peptide with 4 C $\alpha$ 's.



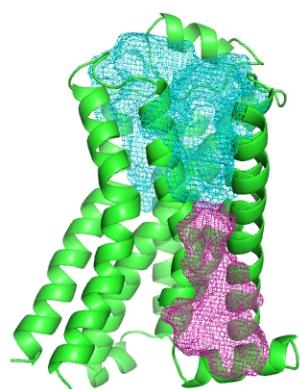

R = 0.50

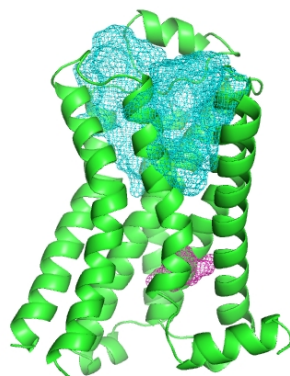

R = 0.56

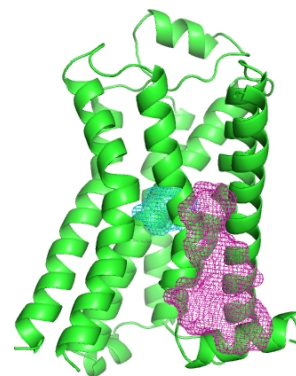

R = 0.80

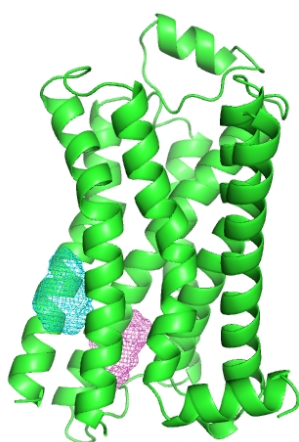

R = 0.55

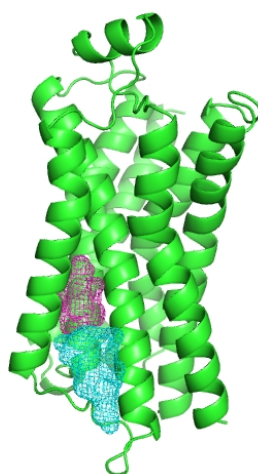

R = 0.54

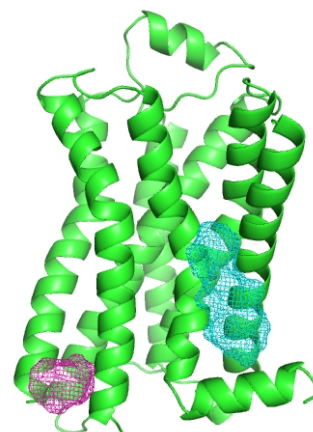

R = 0.74

**Figure S7. D3Pockets results for the  $\beta$ 2AR.** D3Pockets detects sites and calculates correlations between their volumes. The correlations between each pair of sites is shown below the illustrations, where sites are represented as mesh. Correlations were calculated across the experimental ensemble of  $\beta$ 2AR.

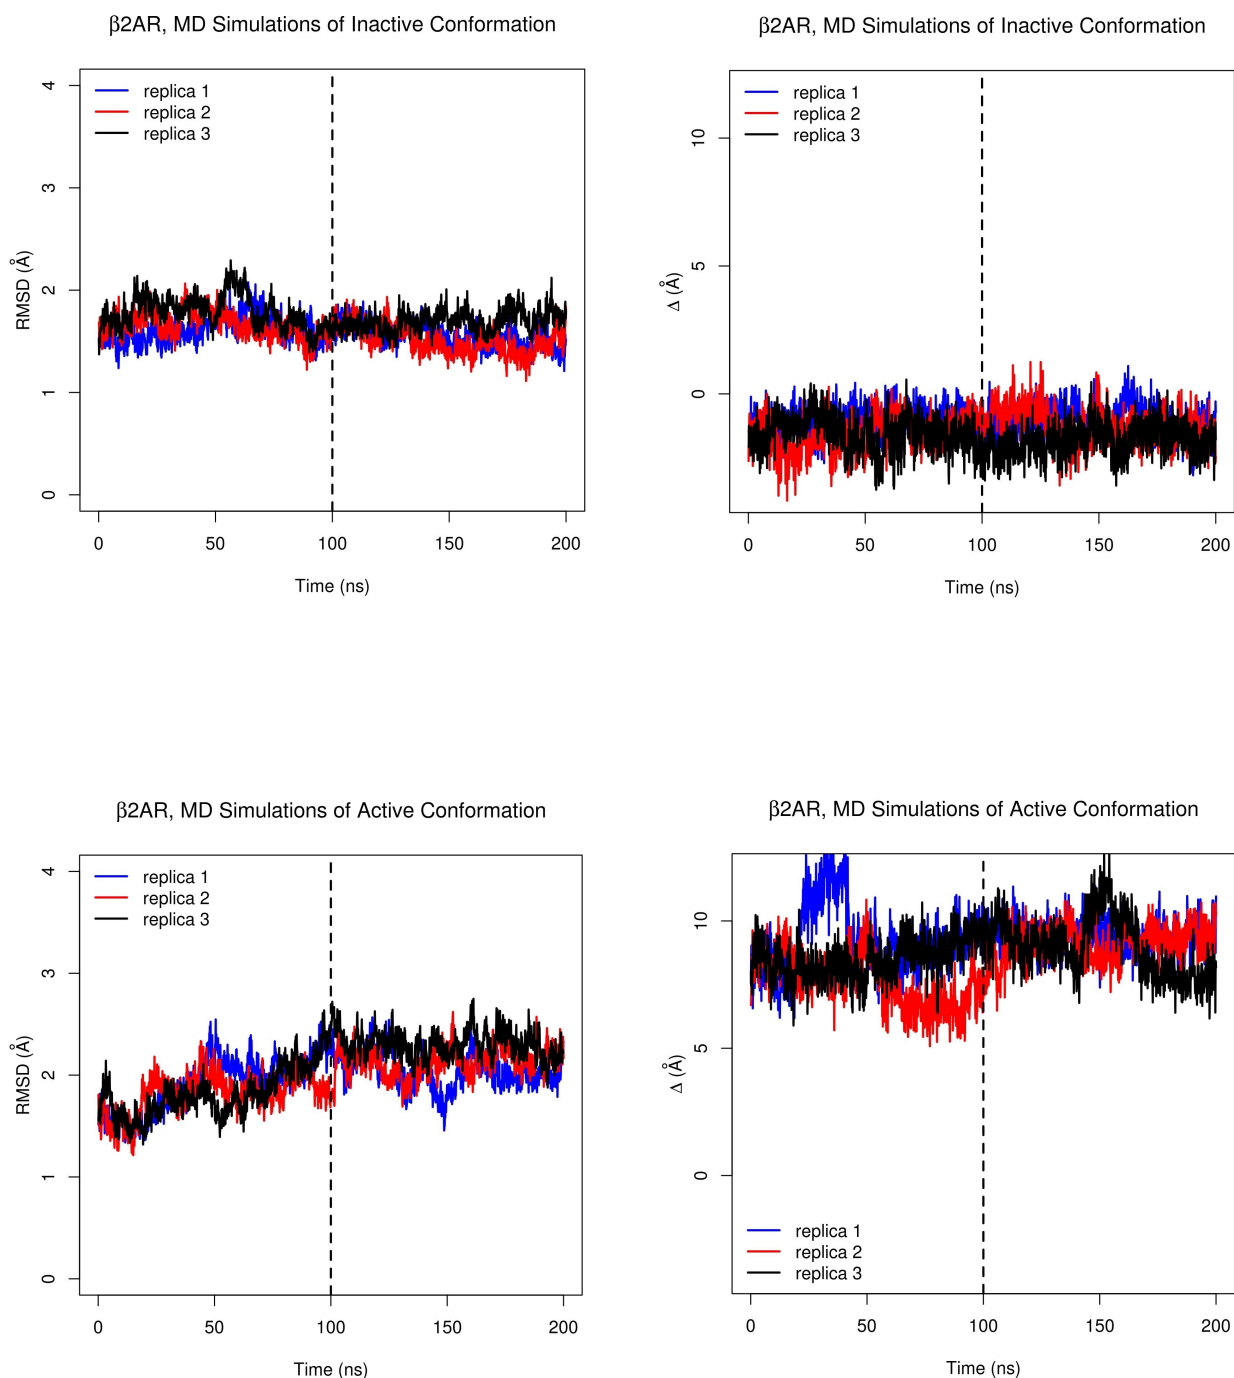

**Figure S8. Time evolution of RMSD and  $\Delta$  in MD simulations of the  $\beta 2AR$ .** Top: inactive conformation; bottom: active conformation. Left: RMSD; right:  $\Delta$ . Graphics are shown for the three replicas in each conformational state. RMSD was measured on the backbone atoms of the receptor, with respect to the input crystal structure. Only the last 100 ns (at the right of the vertical dashed lined) were retained for the dynamical coupling analysis.

**Table S5.** Ranking of  $\beta$ 2AR sites based on the strength of their coupling to  $\Delta$ , obtained from the nine ensembles generated by molecular dynamics simulations. Values of  $C_{\text{site}}$  were calculated in each ensemble, and the table reports the mean value and the standard deviation (SD) for each site.

| Site Label | Coupling with $\Delta$ ( $C_{\text{site}}$ ) |
|------------|----------------------------------------------|
| <b>4*</b>  | <b>0.65 (0.02)</b>                           |
| <b>2</b>   | <b>0.54 (0.02)</b>                           |
| <b>7*</b>  | <b>0.50 (0.03)</b>                           |
| <b>1</b>   | <b>0.46 (0.09)</b>                           |
| <b>3</b>   | <b>0.45 (0.04)</b>                           |
| 6*         | 0.39 (0.08)                                  |
| 9          | 0.36 (0.04)                                  |
| 5          | 0.33 (0.1)                                   |
| 8          | 0.33 (0.1)                                   |

Sites with  $C_{\text{site}}$  above the mean of the ranking are highlighted in bold. Those marked with \* overlap with known allosteric sites.

**Table S6.** Residues in GCGR sites

| Site | Residues                                                                                             |
|------|------------------------------------------------------------------------------------------------------|
| 1    | N300, W304, F312, V363, A366, F367, D370                                                             |
| 2    | V368, T369, E371, H372, L377, R378, K381                                                             |
| 3    | V236, C240, L243, I270, A274, P275, F278, F309, P310, L313, A314, I317                               |
| 4    | L277, F278, P281, W282, V285, K286, F289, E290, V292, W295, S297, D299, M301, G302, F303, W305, I306 |
| 5    | Y239, L354, L357, L358, H361, F387, L388, S389, F391, Q392, G393, L395, V396                         |
| 6    | Y343, R346, L347, K349, S350, T351, L399, Y400, C401, L403, N404, K405                               |
| 7    | V185, L186, S189, S190, V193, V226, F230                                                             |
| 8    | L166, S167, K168, E410, R413, R414, R417                                                             |
| 9    | L253, L255, L328, L329, K332, L333, Q337, M338, H339, D342, K344, F345                               |

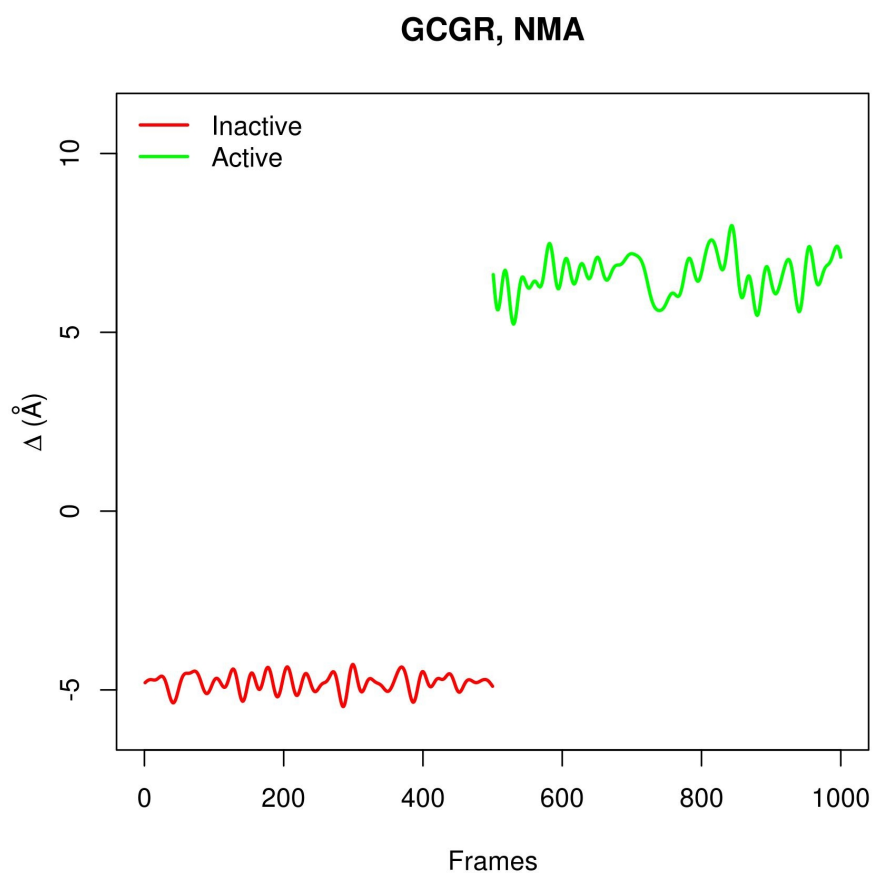

**Figure S9.** Variation of  $\Delta$  in harmonic trajectories (resulting from NMA) of the GCGR

**Table S7.** Ranking of GCGR sites based on the strength of their coupling to  $\Delta$ , obtained from NMA of the inactive conformation.

| Site Label | Coupling with $\Delta$ ( $C_{\text{site}}$ ) |
|------------|----------------------------------------------|
| <b>6*</b>  | <b>0.65</b>                                  |
| <b>5*</b>  | <b>0.54</b>                                  |
| <b>3</b>   | <b>0.50</b>                                  |
| <b>4</b>   | <b>0.46</b>                                  |
| <b>9</b>   | <b>0.45</b>                                  |
| 1          | 0.39                                         |
| 2          | 0.36                                         |
| 7          | 0.33                                         |
| 8          | 0.33                                         |

Sites with  $C_{\text{site}}$  above the mean of the ranking are highlighted in bold. Those marked with \* overlap with known allosteric sites.



**Table S8.** Ranking of GCGR sites based on the strength of their coupling to  $\Delta$ , obtained from the nine ensembles generated by molecular dynamics simulations. Values of  $C_{\text{site}}$  were calculated in each ensemble, and the table reports the mean value and the standard deviation (SD) for each site.

| Site<br>Label | Coupling with $\Delta$ ( $C_{\text{site}}$ ) |
|---------------|----------------------------------------------|
| <b>1</b>      | <b>0.61 (0.06)</b>                           |
| <b>6*</b>     | <b>0.59 (0.02)</b>                           |
| <b>4</b>      | <b>0.55 (0.03)</b>                           |
| <b>9</b>      | <b>0.51 (0.05)</b>                           |
| 5*            | 0.48 (0.07)                                  |
| 3             | 0.45 (0.05)                                  |
| 8             | 0.40 (0.05)                                  |
| 2             | 0.39 (0.03)                                  |
| 7             | 0.36 (0.07)                                  |

Sites with  $C_{\text{site}}$  above the mean of the ranking are highlighted in bold. Those marked with \* overlap with known allosteric sites.

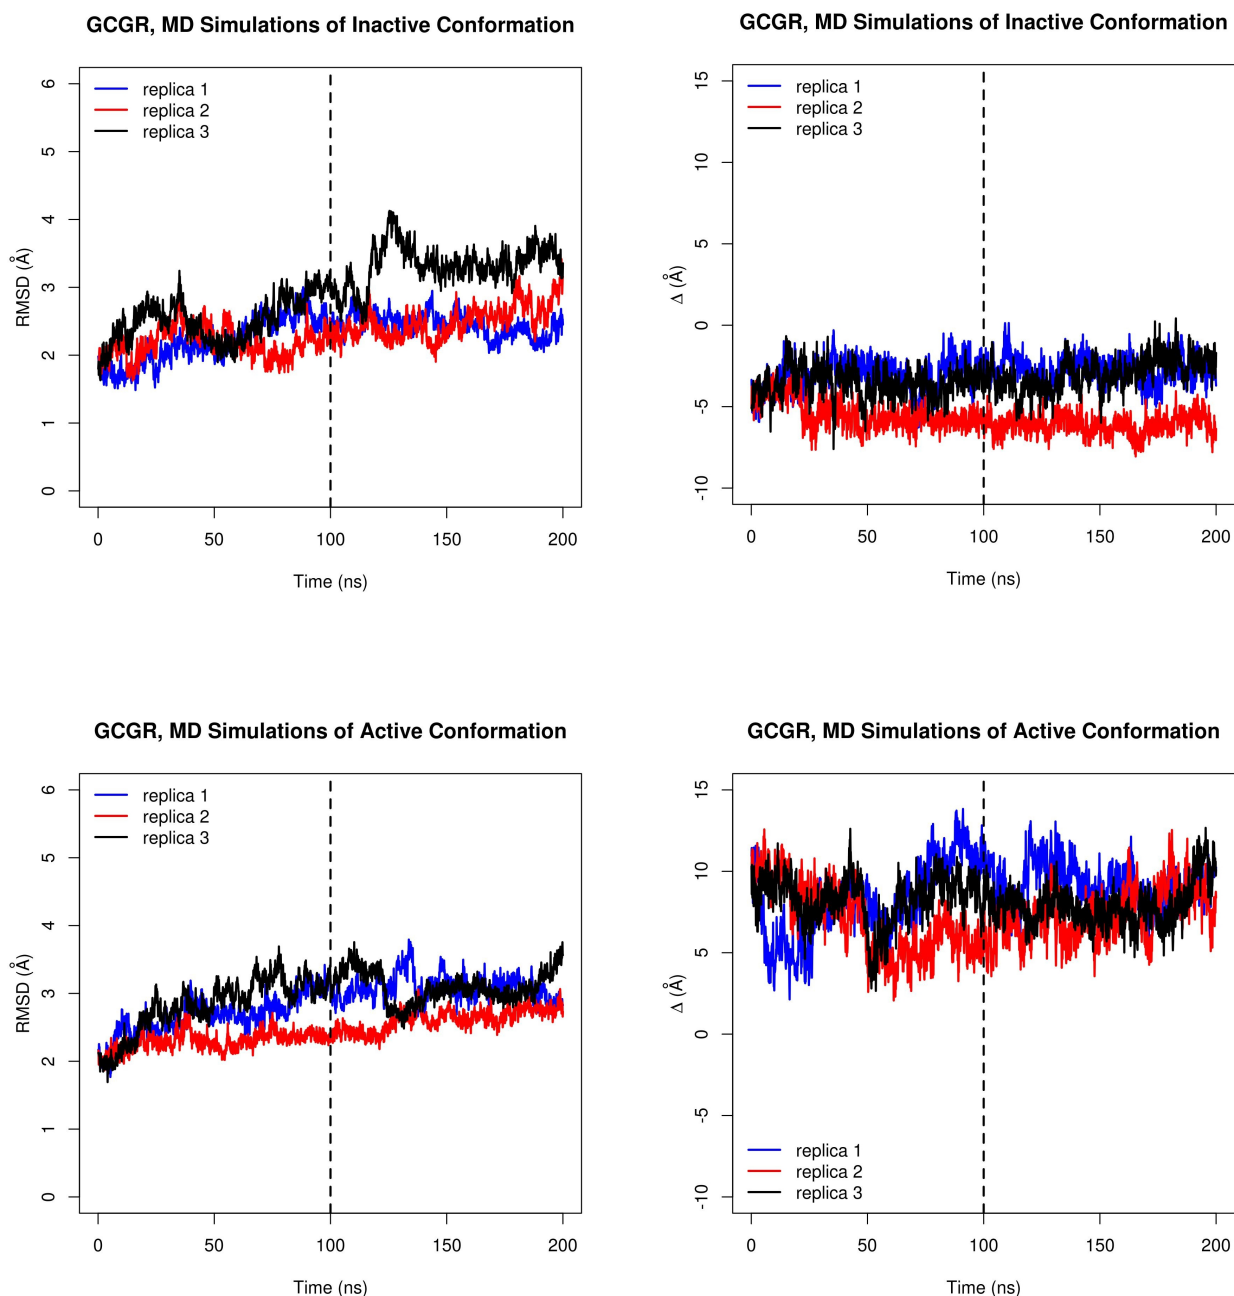

**Figure S10. Time evolution of RMSD and  $\Delta$  in MD simulations of the GCGR.** Top: inactive conformation; bottom: active conformation. Left: RMSD; right:  $\Delta$ . Graphics are shown for the three replicas in each conformational state. RMSD was measured on the backbone atoms of the receptor, with respect to the input crystal structure. Only the last 100 ns (at the right of the vertical dashed lined) were retained for the dynamical coupling analysis.

## M2, NMA

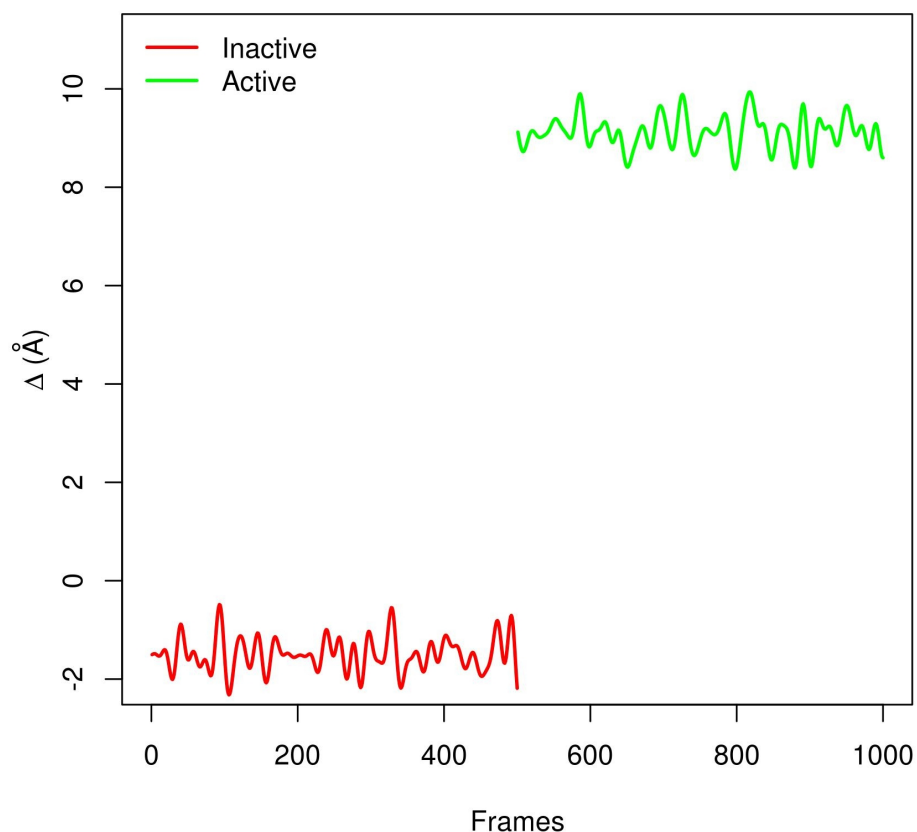

**Figure S11.** Variation of  $\Delta$  in harmonic trajectories (resulting from NMA) of the M2 muscarinic receptor.

**Table S9.** Residues in M2 sites

| Site | Residues                                                                                                                     |
|------|------------------------------------------------------------------------------------------------------------------------------|
| 1    | Y80, Y83, T84, G87, W89, W99, L100, D103, Y104, C176, Y177, I178, F181, T187, Y403, V407, N410, N419, W422, T423, Y426, Y430 |
| 2    | F25, I26, V29, A30, L33, W427, I431                                                                                          |
| 3    | V36, I39, G40, L43, V44, T434, P437, A438, F451                                                                              |
| 4    | L114, S118, F195, V199, M202, T203, Y206, L390, I392, L393, L394, F396, I397                                                 |
| 5    | N58, F61, L62, N113, L114, I117, S118, D120, R121, M202, Y206, T386, R387, T388, I389, I392, L393                            |
| 6    | N108, V111, M112, L154, W155, A158, I159, F180, G189, T190, A193                                                             |
| 7    | V57, F61, L115, I116, I117, F119, D120, F123, Y131, K134, R135, T136, M139, A140, M143                                       |
| 8    | I48, K49, L54, Q55, T56, V57, N59, Y60, F63                                                                                  |
| 9    | V27, A30, G31, S34, M77, N78, T81, L82, V85, W427                                                                            |

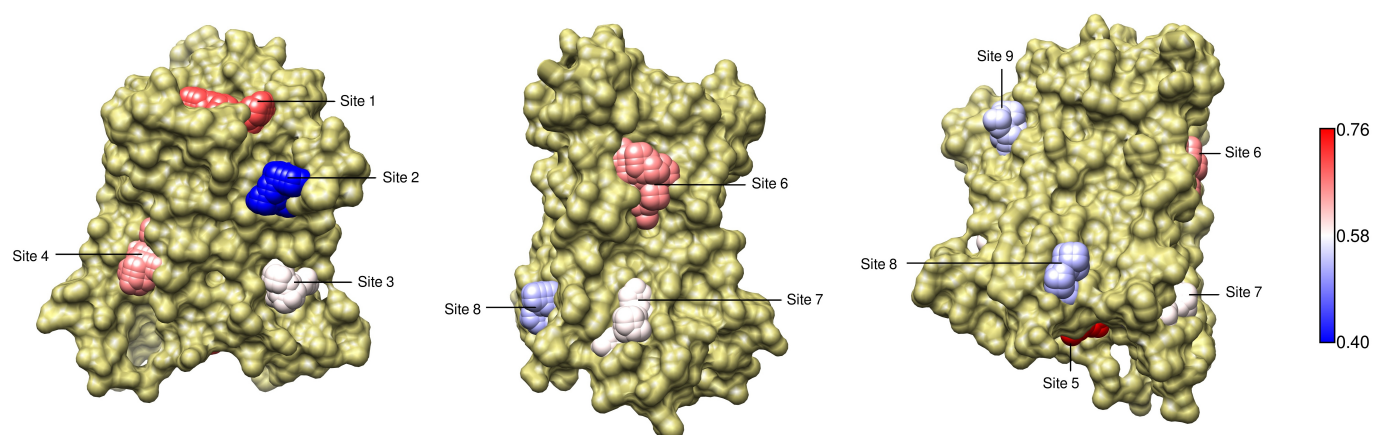

**Figure S12.** M2 sites couplings to  $\Delta$ , obtained from the concatenation of harmonic trajectories (resulting from NMA) of the inactive and active conformations. Sites on the surface of M2 are represented by spheres, that are colored according to the coupling strength (from blue, denoting weaker coupling, to red, indicating stronger coupling). Site 1 corresponds to the allosteric site in PDB structure 4MQT.

**Table S10.** Ranking of M2 sites based on the strength of their coupling to  $\Delta$ , obtained from the concatenation of harmonic trajectories (resulting from NMA) of the inactive and active conformations.

| Site Label | Coupling with $\Delta$ ( $C_{\text{site}}$ ) |
|------------|----------------------------------------------|
| 5          | <b>0.76</b>                                  |
| 1*         | <b>0.72</b>                                  |
| 4          | <b>0.69</b>                                  |
| 6          | <b>0.69</b>                                  |
| 3          | <b>0.64</b>                                  |
| 7          | <b>0.64</b>                                  |
| 9          | 0.60                                         |
| 8          | 0.59                                         |
| 2          | 0.40                                         |

Sites with  $C_{\text{site}}$  above the mean of the ranking are highlighted in bold. The one marked with \* overlaps with the known allosteric site.

**Table S11.** Ranking of M2 sites based on the strength of their coupling to  $\Delta$ , obtained from NMA of the inactive conformation.

| Site Label | Coupling with $\Delta$ ( $C_{\text{site}}$ ) |
|------------|----------------------------------------------|
| 5          | <b>0.27</b>                                  |
| 4          | <b>0.21</b>                                  |
| 3          | <b>0.16</b>                                  |
| 8          | <b>0.14</b>                                  |
| 1*         | 0.12                                         |
| 7          | 0.09                                         |
| 6          | 0.08                                         |
| 2          | 0.07                                         |
| 9          | 0.07                                         |

Sites with  $C_{\text{site}}$  above the mean of the ranking are highlighted in bold. The one marked with \* overlaps with the known allosteric site.

**Table S12.** PDB codes of structures in the experimental ensemble of the M2 muscarinic receptor

| Inactive                                     | Active                                |
|----------------------------------------------|---------------------------------------|
| 3UON [62], 5YC8, 5ZK3, 5ZK8, 5ZKB, 5ZKC [88] | 4MQS, 4MQT [33], 6OIK [89], 6U1N [90] |

Numbers in brackets refer to the references in the main text.

**Table S13.** Ranking of M2 sites based on the strength of their coupling to  $\Delta$ , obtained from the ensemble of experimental structures

| Site Label | Coupling with $\Delta$ ( $C_{\text{site}}$ ) |
|------------|----------------------------------------------|
| 5          | <b>0.66</b>                                  |
| 1*         | <b>0.63</b>                                  |
| 7          | <b>0.60</b>                                  |
| 6          | <b>0.58</b>                                  |
| 4          | <b>0.53</b>                                  |
| 9          | 0.50                                         |
| 8          | 0.49                                         |
| 3          | 0.42                                         |
| 2          | 0.30                                         |

Sites with  $C_{\text{site}}$  above the mean of the ranking are highlighted in bold. The one marked with \* overlaps with the known allosteric site.

**Table S14.** Ranking of M2 sites based on the strength of their coupling to  $\Delta$ , obtained from the nine ensembles generated by molecular dynamics simulations. Values of  $C_{\text{site}}$  were calculated in each ensemble, and the table reports the mean value and the standard deviation (SD) for each site.

| Site Label | Coupling with $\Delta$ ( $C_{\text{site}}$ ) |
|------------|----------------------------------------------|
| 5          | <b>0.58 (0.04)</b>                           |
| 6          | <b>0.50 (0.02)</b>                           |
| 4          | <b>0.41 (0.02)</b>                           |
| 1*         | 0.35 (0.08)                                  |
| 7          | 0.35 (0.03)                                  |
| 3          | 0.33 (0.06)                                  |
| 9          | 0.27 (0.06)                                  |
| 2          | 0.24 (0.06)                                  |
| 8          | 0.24 (0.02)                                  |

Sites with  $C_{\text{site}}$  above the mean of the ranking are highlighted in bold. The one marked with \* overlaps with the known allosteric site.

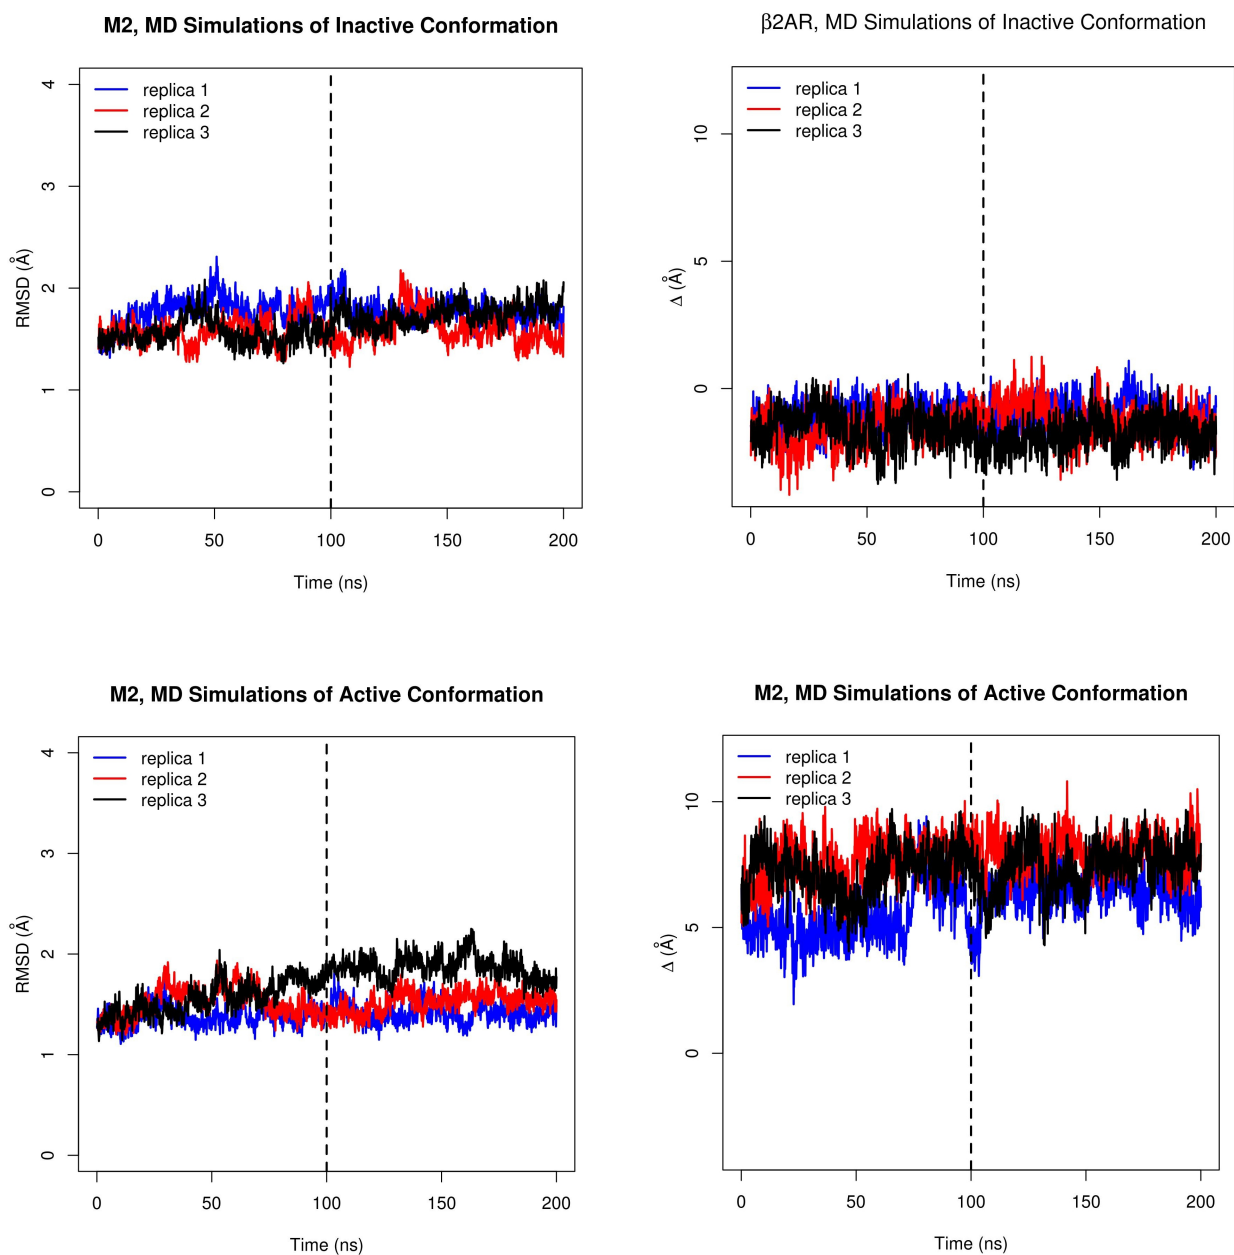

**Figure S13. Time evolution of RMSD and  $\Delta$  in MD simulations of the M2 muscarinic receptor.** Top: inactive conformation; bottom: active conformation. Left: RMSD; right:  $\Delta$ . Graphics are shown for the three replicas in each conformational state. RMSD was measured on the backbone atoms of the receptor, with respect to the input crystal structure. Only the last 100 ns (at the right of the vertical dashed lined) were retained for the dynamical coupling analysis.

**Table S15.** Summary of molecular dynamics simulations.

| System | PDB input | State    | Included residues | # atoms | # water molecules | # lipid molecules | orthosteric ligand | Nanobody |
|--------|-----------|----------|-------------------|---------|-------------------|-------------------|--------------------|----------|
| β2AR   | 2RH1 [31] | Inactive | 32-230; 268-342   | 59071   | 11373             | 152               | carazolol          | --       |
| β2AR   | 4LDO [32] | Active   | 28-231; 263-342   | 77661   | 16957             | 151               | adrenaline         | Nb6B9    |
| GCGR   | 5XF1 [26] | Inactive | 27-418            | 82243   | 18425             | 153               | --                 | --       |
| GCGR   | 6LMK [61] | Active   | 27-418            | 82717   | 18471             | 152               | glucagon           | --       |
| M2     | 3UON [62] | Inactive | 20-217; 377-456   | 58088   | 10939             | 154               | QNB                | --       |
| M2     | 4MQS [33] | Active   | 19-215; 377-456   | 73003   | 15415             | 152               | iperoxo            | Nb9-8    |

Simulation time: 3 independent replicas of 200 ns for each system

Numbers in brackets refer to the references in the main text.



**$\beta$ 2AR, inactive (2RH1)**

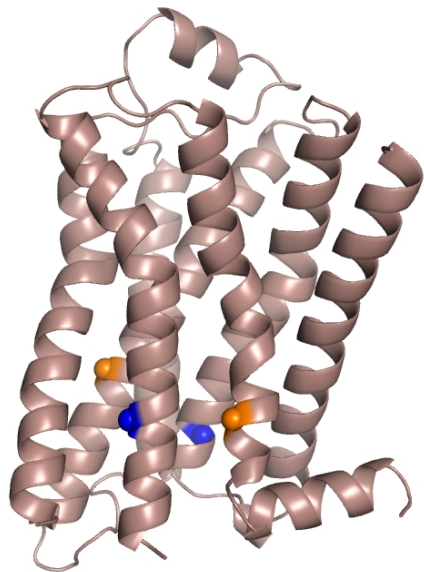

(a)

**$\beta$ 2AR, active (4LDO)**

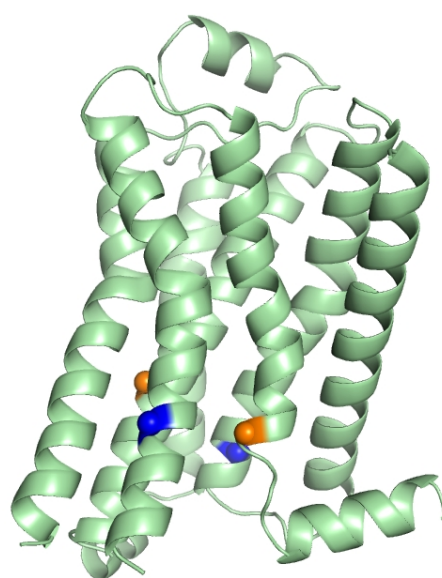

(b)

**GCGR, inactive (5XF1)**

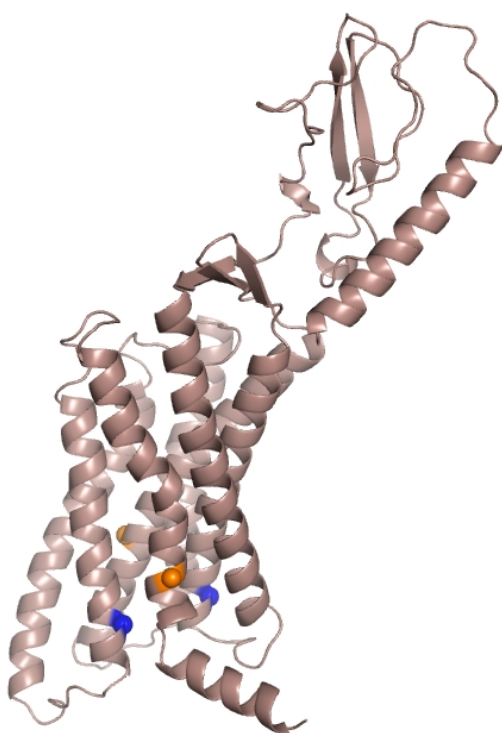

(c)

**GCGR, active (6LMK)**

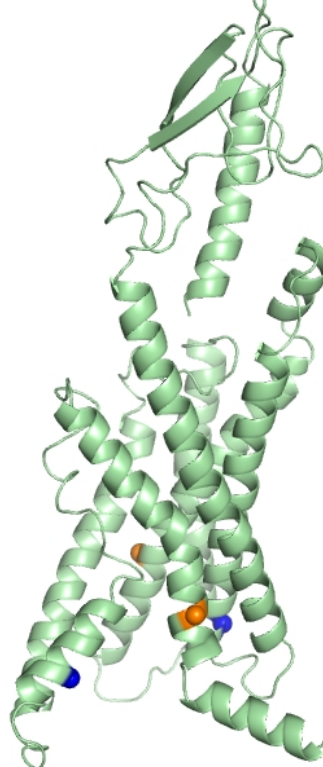

(d)

**M2, inactive (3UON)**

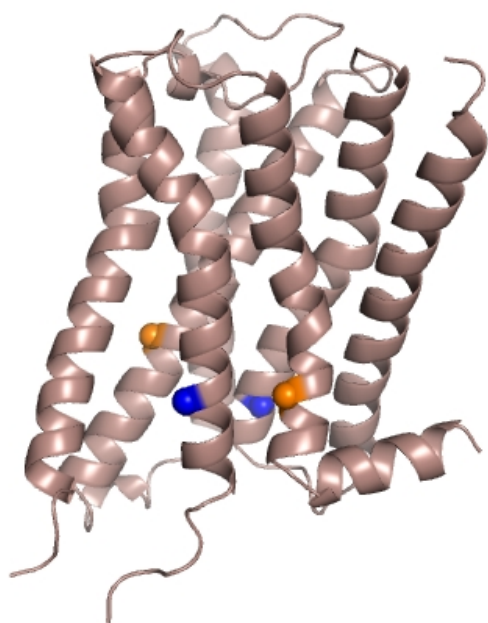

(e)

**M2, active (4MQS)**

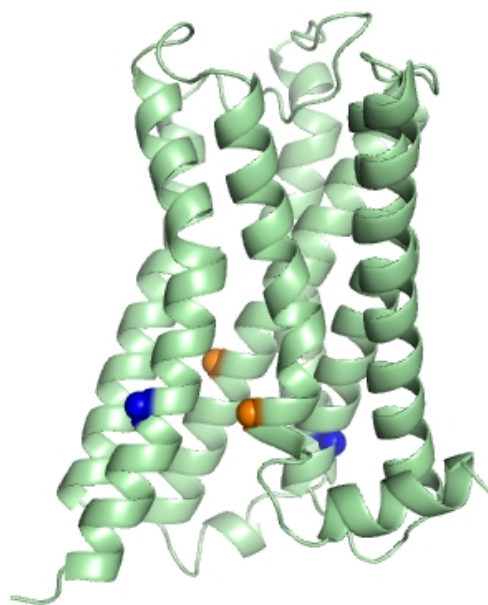

(f)

**Figure S14. Receptor structures used as inputs for NMA and MD simulations.** Left, in red: inactive conformations; right, in green: active conformations.  $C\alpha$ 's involved in the definition of  $\Delta$  are shown as spheres. Atoms in TM2 and TM6 are shown in blue; atoms in TM3 and TM7 are shown in orange. Receptor models correspond to PDB structures a) 2RH1; b) 4LDO, c) 5XF1, d) 6LMK, e) 3UON and f) 4MQS.
