# Supplementary material for: Dynamical Correlations Reveal Allosteric Sites in G Protein-Coupled Receptors
Source: Int J Mol Sci. 2020 Dec 27;22(1):187. doi: 10.3390/ijms22010187 (PMC7795036; doi:10.3390/ijms22010187)
Supplement: Supplementary file 1 [file ijms-22-00187-s001.zip]

Archive with 5 entries (4 files):
- Supplementary materials and data/
- Supplementary materials and data/Supplementary materials.pdf
- Supplementary materials and data/supp_data_1_correlation_distances_delta_xray_beta2.txt
- Supplementary materials and data/supp_data_2_correlation_distances_delta_nma_gcgr.txt
- Supplementary materials and data/supp_data_3_final_snapshots_MD_simulations.zip
