# Supplementary material for: Dynamical Correlations Reveal Allosteric Sites in G Protein-Coupled Receptors
Source: Int J Mol Sci. 2020 Dec 27;22(1):187. doi: 10.3390/ijms22010187 (PMC7795036; doi:10.3390/ijms22010187)
Supplement: Supplementary file 1 [file ijms-22-00187-s001.zip › Supplementary materials and data/supp_data_1_correlation_distances_delta_xray_beta2.txt]

0 -0.589535180598222 0.000834472001141861 -0.736114342844581 -0.263450691662444 -0.33722092208327 -0.312555121218025 -0.380045977502391 -0.283915682436294 -0.231939117511745 -0.441227905840412 -0.364821202479243 -0.344008753909424 -0.355506334770299 -0.3627847093786 -0.435300155147939 -0.455073438390331 -0.396962126475656 -0.419827008367389 -0.436912027889118 -0.491411851745784 -0.482975384851131 -0.477748403914992 -0.464458524490929 -0.453653509326891 -0.539375971706152 -0.50338088124635 -0.461485610499882 -0.484351696553447 -0.463598298020182 -0.535612157519919 -0.467481423979349 -0.46819558348179 -0.260483411270216 -0.408584795713785 -0.389437247864437 -0.348464176629078 -0.310818284477515 -0.310298569750264 -0.550148275634424 -0.538749017128977 -0.2566380874796 -0.554846766557017 -0.609473869243258 -0.334058339251551 -0.229802222531646 -0.28344646002869 -0.355763417321703 -0.166829364804334 -0.334741813848333 -0.36231959010471 -0.406768283426708 -0.0719072022905146 -0.500323685309011 -0.37800432524834 -0.321603180792673 0.0739177158995243 0.171756310656639 -0.178216333113196 -0.0241791665091663 0.400668450735353 0.217742769486049 0.111524150141941 0.444119499954874 0.522208819569128 0.228887267058414 0.297180837254047 0.290102231263792 0.651338726744378 0.630246715531864 0.523140727529214 0.178473914127749 0.332424386786284 0.466229083817773 0.011556301107339 -0.319590368159175 -0.206429382416773 -0.220276033169368 -0.492791354339851 -0.564590557737712 -0.610468133339366 -0.665143230765146 -0.726149501933646 -0.720995727728067 -0.697049293682088 -0.861918605903117 -0.866509372586368 -0.869730146792838 -0.913290420517812 -0.93263499084842 -0.924183230038279 -0.925806788198482 -0.950825350456603 -0.949999811368045 -0.946603890812014 -0.944037067952179 -0.951004171629445 -0.949482831940151 -0.951072156076875 -0.944395261375435 -0.957951030764684 -0.959769909352823 -0.923819767216614 -0.932758773618595 -0.94934482412537 -0.934954534346762 -0.964236605584727 -0.279570234906947 0.700752445338188 0.736852612779734 0.776594693288621 0.980534229806108 0.652552219549545 -0.535477881960892 -0.617559441080851 -0.250039316060527 -0.24844209883081 -0.634074095182768 -0.622387653460793 -0.347104082345682 -0.634093268984331 -0.8153987848556 -0.668295141272284 -0.409594759855253 -0.798765966779162 -0.847002646432884 -0.667519213553129 -0.69881224785667 -0.91406366678074 -0.903549592523879 -0.579674515430299 -0.752976328144995 -0.90805337177074 -0.829965280660309 -0.60545180858828 -0.567286302169204 -0.518182112471209 -0.438634164931701 -0.350713031936149 -0.45915966816849 -0.355936961688215 -0.423101172311001 -0.376658519240806 -0.441357324854238 -0.30751174082942 -0.518394045958682 -0.457353213129293 -0.234045835991807 -0.211604521749722 -0.165346694145642 -0.0370687986785477 0.0859388416127543 0.038247853239462 0.014174909752002 0.243364878483299 0.434242095343009 0.587077644560545 0.596980322140442 0.224692689351021 -0.167817867577692 -0.396011840931426 -0.617843924253353 -0.454156368974341 -0.541190194859626 -0.597049131582287 -0.5357630802038 -0.647604805860134 -0.696399749807252 -0.681326193918331 -0.731251879142608 -0.802500188014385 -0.855102072289335 -0.831347813254544 -0.827500539119171 -0.905010247214639 -0.919763074401165 -0.876474245377204 -0.807288344203485 -0.860031971144072 -0.913524914360273 -0.855715324661184 -0.77555002972956 -0.893599068414431 -0.907449890197218 -0.798287375951971 -0.786357895347381 -0.91504952485527 -0.895779752113859 -0.771445586767684 -0.827179883140758 -0.879358877644808 -0.853783418184757 -0.820949637143429 -0.849397926010172 -0.802415425458056 -0.597794194216334 -0.0842951403014174 -0.912465186231682 -0.975506442990229 -0.91224912727657 -0.685479637827351 -0.946356912085375 -0.962058380585542 -0.811348213907896 -0.788419786476705 -0.951552087187131 -0.938092852682342 -0.455133496093616 -0.832504706743928 -0.942921557818817 -0.899233407929603 -0.66671584318151 -0.873005401613863 -0.9160479586411 -0.849749468433041 -0.7532916580461 -0.811622680348401 -0.797573031027062 -0.736393797557184 -0.743999663314417 -0.752114861263361 -0.738653787197052 -0.653555647547158 -0.718226149424705 -0.777942373289515 -0.724590163364472 -0.700618729696113 -0.739951361157845 -0.597367881038798 -0.450813481647395 -0.687384744237225 -0.545847502155377 -0.623155325192598 -0.733511784929357 -0.552838747712521 -0.639472738552751 -0.728562571690892 -0.674430139972178 -0.599409778003797 -0.734695490746121 -0.768192310109983 -0.654661433691345 -0.653884562058995 -0.816842431158666 -0.749605241141336 -0.457666513065995 -0.318672704172878 -0.466307638585592 -0.223567269290889 -0.465095360129468 -0.587246303956867 -0.697185244526387 -0.186152424942162 0.254947697662807 -0.344172445732191 -0.2049970141671 0.649475674215981 -0.534859292418957 0.362505145801403 0.307194885066197 0.150272143148628 0.130980350468535 0.264825732247229 0.150714570567982 0.176480135035272 0.22125579540869 0.245899720926709 0.118794090310427 0.169589348515416 0.491893028920078 0.31476328362224 0.163511839591962
-0.589535180598222 0 -0.392685574181536 -0.396430457810252 0.335506760016299 0.112057317990095 0.128487517449601 0.246713370125055 0.311248592979805 0.295558785697627 0.188863828291564 0.278960546627845 0.124690107088487 0.0668959072603876 0.149348449286196 0.0904352912456117 -0.0146698968384696 0.0329320872494192 0.188693334286354 0.119470503698374 -0.102453284074707 -0.0755926024147832 0.0350114989591837 0.0094850245733403 -0.108872010876263 -0.169342833645967 -0.111258406970601 -0.0558374579081128 -0.175955605040433 -0.0693796748375581 -0.134397550643099 -0.00781947710173438 0.00370973257451458 0.268743644447103 0.180346096083235 0.134639267493309 0.131913834214086 0.304773633095697 0.370029478733223 -0.00227007240617748 -0.0198028209782516 0.443660865764278 -0.0123738711903052 -0.257169635050583 0.280852229150518 0.395086119927042 0.390288991309068 0.337480497376984 0.408686522083913 0.135665196598293 0.130237374278095 0.0266738665390933 0.308423988265545 -0.202994086275753 0.0365618673485673 0.140986817569716 0.405847291850707 0.441320666485479 0.166953784279289 0.310474487194778 0.551618441895244 0.44502615247645 0.286397143802709 0.598103601091885 0.609529680141536 0.230715612826431 0.412953458865917 0.454607744582691 0.721157025258396 0.715019951331985 0.653177473655094 0.427799694122465 0.602401636859469 0.675019933730697 0.343949343605008 -0.0335198922460599 0.154738520646473 0.149013083227189 -0.366124737179131 -0.422803334651393 -0.422253328228682 -0.589234751526597 -0.734552320872517 -0.654300710995071 -0.63912182619833 -0.907573069824289 -0.905843660132972 -0.875722658064266 -0.941820993862365 -0.964497992244828 -0.955012135027052 -0.949237179697555 -0.968658924833138 -0.966814646692954 -0.962763431855446 -0.95825683071286 -0.963105699748431 -0.965369553780073 -0.960367565108776 -0.951034003323975 -0.963574789564159 -0.971267022056708 -0.912793595572859 -0.923991696859185 -0.950521454920598 -0.930350971615872 -0.9713990086088 0.0422295613874592 0.859557212155928 0.87186523951435 0.899536452992137 0.992938946411453 0.868341024871129 0.0346791296705994 -0.176846654989565 0.33026025087566 0.401207180763164 -0.162849447799038 -0.191476691610116 0.302281304757681 0.0205005356622161 -0.709368148175741 -0.326927798943924 0.273299538601548 -0.651727017425868 -0.824188553703349 -0.392004772818617 -0.407881606483899 -0.893215909609628 -0.890177701671966 -0.318932224419751 -0.65267060604115 -0.898031540429418 -0.837740376253768 -0.441113516631621 -0.321778785420839 -0.31771573211719 -0.161839592036327 -0.0553900550865211 -0.238711377837554 -0.157471978529015 -0.213152689338186 -0.10502322728321 -0.251523534227935 -0.100556491178084 -0.434356607441899 -0.416629911223035 -0.100245187203762 -0.128896637512828 0.0195227738748906 0.221827227411326 0.297166720267569 0.280126657043457 0.298505145270269 0.478740639258419 0.583617233216963 0.698664950135736 0.693757644456798 0.44797015920406 0.00321449806341797 -0.342092004790232 -0.602263878301932 -0.339648488836705 -0.48699979760694 -0.547695106267603 -0.434449544276474 -0.643941645140276 -0.719121565804776 -0.670995921092631 -0.732066159566511 -0.815910126500805 -0.85632844873212 -0.860838397995232 -0.867174633534144 -0.929582657367416 -0.935020486455859 -0.890044633271535 -0.788346740369788 -0.870263057785082 -0.924126300723305 -0.812018912994045 -0.655794347795641 -0.899151249638213 -0.905010473973677 -0.660215209040998 -0.653808694252193 -0.928977272488267 -0.892546437655951 -0.584883477199547 -0.741240178804099 -0.829491442709962 -0.772175741000473 -0.744576513170909 -0.727212464409463 -0.54595314770069 -0.168431261045338 0.250146338899797 -0.678860665993758 -0.964719510881067 -0.833522681609853 0.264276971354504 -0.917328072674168 -0.962731536827523 -0.342448620727483 -0.114775017109389 -0.953560921949064 -0.945522653350826 0.693411924895696 -0.648606583076278 -0.962319486795069 -0.925929421423436 -0.260672890004377 -0.871808430608929 -0.928588151785493 -0.875542136834817 -0.698356575396382 -0.803700028662046 -0.791548110532653 -0.717595481390161 -0.730372245202894 -0.74632624711468 -0.743082318474792 -0.601327383227094 -0.662569755503778 -0.767764605359388 -0.715506521822524 -0.684746458629671 -0.73546762304971 -0.572615228583599 -0.353655356307574 -0.619361286985518 -0.471184752051879 -0.568150650500035 -0.661298410957128 -0.487278550351934 -0.633163816845196 -0.71846079217808 -0.682482485442536 -0.624683031964869 -0.751598821879364 -0.776121672926771 -0.649029215234495 -0.707921747734704 -0.86566684938984 -0.708147510722342 0.148008393076688 0.49494125547358 0.287908738689484 0.667602034388835 0.0996502517496743 -0.313668190696972 -0.644247055074132 0.510514954358962 0.812438389276353 0.48328512292563 0.578191051347949 0.802066192351934 -0.521670299304315 0.798685360673039 0.726963010525094 0.622044557171401 0.644611520273656 0.619479876071839 0.499771632891542 0.599882750545582 0.643341901620838 0.497017111881457 0.378332110568214 0.392345854782815 0.568154479296712 0.43519402467616 0.234032771944394
0.000834472001141861 -0.392685574181536 0 -0.563093153089086 -0.370300555711062 -0.476135381695845 -0.293108118988887 -0.420889156100107 -0.505274832379647 -0.180708284717062 -0.196407913426842 -0.286104377225845 -0.325482067679104 -0.23751401097561 -0.228643099897532 -0.36195461094498 -0.360260194051059 -0.239579509871887 -0.305244261204718 -0.307329430812962 -0.366050431668552 -0.345340831188498 -0.355026996650914 -0.29478054095704 -0.326841250525506 -0.412884012317696 -0.386230404946732 -0.305200113671002 -0.365973412946588 -0.328909034995205 -0.399208027484597 -0.346834998745749 -0.357497988572053 -0.0134821725561194 -0.254354447275127 -0.217104259496369 -0.206780135368173 -0.10022098303992 0.0214383362099437 -0.423318836247855 -0.498057629941335 0.0554608993628432 -0.433747853963277 -0.658542434041245 -0.231995840960642 0.049894631326392 -0.071283051942412 -0.210160707384247 0.0780964553467909 -0.214336165817369 -0.318821834767679 -0.360214628849871 0.0990097077876997 -0.537179986420178 -0.356197762075093 -0.405743761504323 0.111713848537643 0.176558708680978 -0.429256506849219 -0.368795594099206 0.327994461754382 -0.0433817483538736 -0.351666648835505 0.0821753001966802 0.265765497103905 -0.17993081653668 0.0891459731467788 0.196309770837259 0.663114994585632 0.729665362785468 0.648517785917429 0.386018407312408 0.561423672635033 0.582882443472308 0.105314047936247 -0.242372398470962 -0.069458789620847 -0.15129171734948 -0.643609828292693 -0.660466335232677 -0.64231738367483 -0.792886302330669 -0.858461265913498 -0.813320087954888 -0.854976813951841 -0.931849956469893 -0.923559910889395 -0.921948631681872 -0.962757856101064 -0.973049198119239 -0.968681676117887 -0.96557382887983 -0.980401120010886 -0.979613974238873 -0.973379935980506 -0.9652141224139 -0.971998384271812 -0.970899558249513 -0.968062782846493 -0.967941696982779 -0.973176554605219 -0.976113075863841 -0.942528677041845 -0.956276947623008 -0.967629141401128 -0.954816418091034 -0.975322480206066 -0.0778493820610425 0.842895508764902 0.849954375571964 0.882467015887285 0.992474560318741 0.867749169653309 -0.244046653217063 -0.375120853520162 0.182265735313122 0.304743263532022 -0.33223040299632 -0.431262786741382 0.162777152325216 -0.140382675972235 -0.830824254440918 -0.59705928232726 0.128091995310195 -0.731270660917576 -0.890434442812152 -0.609676304923245 -0.531114831899501 -0.901023801882168 -0.900698562484257 -0.513436960384414 -0.727107445642219 -0.905767690358875 -0.852747443499801 -0.608091401569056 -0.543925154888622 -0.544760605995119 -0.395197511410192 -0.245522903472825 -0.403982195229819 -0.370114549779097 -0.408769231248212 -0.320694041171537 -0.392951455591039 -0.227736038572521 -0.515173582097845 -0.511164469092907 -0.187577852199342 -0.232029925510834 -0.154508493547356 0.0356489479141244 0.0877426042671889 0.0421129700863627 0.0886215781337074 0.294737400782789 0.383752215374135 0.553169968017603 0.502127299758071 0.19800017826736 -0.226394314686833 -0.482965945980634 -0.667086736939471 -0.509740152606963 -0.649937163939761 -0.677715660827217 -0.625796685052003 -0.770560250401684 -0.812536407574507 -0.789620269418884 -0.833268554783187 -0.883619266459471 -0.894350196359084 -0.920286870117918 -0.926306758515829 -0.952416232732974 -0.954071690416767 -0.93156774176585 -0.880284500043959 -0.923758973106207 -0.951982252246073 -0.87762505304222 -0.79082925436904 -0.941424729645332 -0.949238333652026 -0.809301844181747 -0.823299774777679 -0.949638612676511 -0.928692424520707 -0.720524468195036 -0.833991791699113 -0.885028955825777 -0.799852538035445 -0.799788572907084 -0.76051591307789 -0.589854240239912 -0.251918638803439 0.265277890789455 -0.564228822419141 -0.930237221420132 -0.895795077825843 0.314340214452553 -0.886402879413996 -0.957247928669558 -0.543560632826874 -0.2297182543385 -0.961487245454856 -0.958661547099195 0.430699788732869 -0.756434244116925 -0.968550137554255 -0.956077698881821 -0.615177293289185 -0.92320602782083 -0.947542222195851 -0.913241124816482 -0.821371944613197 -0.879822405373084 -0.871057476035219 -0.837378705892083 -0.843113893161785 -0.849898176269882 -0.833432663776512 -0.697180482518611 -0.74873211995472 -0.841164337457191 -0.772183581702626 -0.744772414589947 -0.808007193526266 -0.697391077917214 -0.455695913500516 -0.680538550186029 -0.57249271788 -0.692477337930497 -0.767208282291722 -0.608602718749922 -0.746161524729511 -0.829706905021318 -0.794688408050239 -0.763282497919302 -0.844180688200466 -0.862741476187637 -0.800282429842322 -0.846413219136586 -0.918946440665694 -0.844304715343994 -0.532079086330369 -0.319341077705874 -0.399940486796436 0.143898602640938 -0.432943468277709 -0.663060893983089 -0.77810855895759 0.302274164109496 0.717869145893842 0.128178868405541 0.580690354645684 0.745061509038545 -0.822702119612317 0.481828703728804 0.415676969671144 0.20597717954023 0.26832054400071 0.340689936731746 0.200362032259181 0.267109134099009 0.330645041922109 0.225587438754878 0.13676472844453 0.191390261008514 0.415949948732266 0.327634654013956 0.0952506077435466
-0.736114342844581 -0.396430457810252 -0.563093153089086 0 -0.384127226277748 0.142094950455388 0.460008033202255 0.254536167073377 0.161941541832717 0.317156733618141 0.216464831476135 0.217528138358451 0.0835254760316774 0.126518157092219 0.180504600291374 0.00293082299897269 -0.0137467273460198 0.130304142710792 0.258060110460151 0.142209122762344 -0.025165851846071 0.0546030703158371 0.0678694432800556 0.0580813362830678 0.0307633860710845 -0.0565495195395975 -0.0629058168145922 0.0469019145739308 -0.0569946608944919 0.112212284164731 -0.00899488315408504 0.103227346910399 0.0379523828952692 0.242444938726253 -0.0035813960963084 -0.0917541654320716 -0.0927240411600928 0.123045610222579 0.219755191404145 -0.369705068046383 -0.302725600283736 0.305523515789285 -0.296886447633382 -0.506440977904458 0.076200135895152 0.291519261272806 0.085235740010258 0.0350129556860451 0.33694337218167 -0.0504864759906099 -0.204317741650292 -0.162632228308395 0.310892532084901 -0.496775863497329 -0.311043842604816 -0.253705296725833 0.317084975816802 0.301549190772432 -0.251596334905838 -0.00859519550628984 0.493097853317264 0.175963271720781 -0.0932734879631649 0.48982325774845 0.498381471001328 -0.0840769656404749 0.224416479537101 0.348466138385565 0.723214157237524 0.769481645418666 0.699062567792911 0.364117510736579 0.677411973939701 0.776207227093367 0.144409427075425 -0.524716222952114 -0.0979713595339512 -0.123801612947464 -0.707231574953684 -0.73540935344477 -0.701768211879389 -0.754663664222738 -0.800276479095291 -0.776532263166572 -0.74147464633321 -0.919105973863908 -0.924222024634317 -0.913798574125516 -0.943924031582849 -0.957597116207137 -0.958189533724436 -0.950660630265625 -0.966715422865194 -0.966859706415236 -0.958371536457865 -0.949881388224023 -0.959077276617592 -0.956167419235592 -0.96251886884902 -0.964001497876333 -0.967426289106066 -0.968800677268606 -0.950123156308095 -0.959622841861046 -0.968666171159361 -0.959719155898032 -0.970767025304538 -0.0132014484467253 0.856273889257125 0.876053536039435 0.874168302200945 0.989940523796214 0.848425963633704 -0.240986610917527 -0.331549242378624 0.279693704522574 0.357315514270133 -0.385199902975646 -0.398116856695317 0.187519688396581 -0.263183209030533 -0.7946081213383 -0.552607023062889 0.0390594110101066 -0.785414815134579 -0.895055111464384 -0.654061214678845 -0.657913592768162 -0.950503563406441 -0.94869637214434 -0.528356917423638 -0.779981350888558 -0.956806126661082 -0.899765180224574 -0.743861503804403 -0.759059461943319 -0.733141540180371 -0.701054027465606 -0.512687940143667 -0.726258352822303 -0.576046845942911 -0.671548376251294 -0.620224027087986 -0.678275809303906 -0.468365333628107 -0.657866276797949 -0.666417651811653 -0.452939186746942 -0.42854592362018 -0.413624372007872 -0.244568568630334 -0.178464331489786 -0.189515405206614 -0.13305409602997 0.247469321666453 0.462304547834964 0.710191053714448 0.685563304326084 0.26334508598094 -0.431475349550847 -0.630781433012803 -0.755654163772095 -0.709187416408034 -0.792896299161847 -0.811003641350619 -0.711339064840705 -0.827129986076855 -0.875067784022946 -0.840448044475056 -0.857359703272773 -0.924446295886032 -0.940845879438441 -0.933977352513873 -0.924641312594978 -0.964456375616858 -0.963485977796664 -0.935399006962895 -0.885820692558343 -0.920289434326344 -0.94635178341623 -0.872172291618637 -0.776052233350954 -0.92159708579436 -0.93185823898844 -0.769046571165767 -0.781172568936839 -0.920685707257686 -0.891861550961775 -0.654534345927772 -0.773941756250472 -0.839546432079549 -0.743688359779404 -0.720599527829102 -0.711518796620792 -0.59900766347744 -0.276232437927813 0.168788387922871 -0.767281988153956 -0.941295108006152 -0.914022431536167 -0.277077445154684 -0.906758422928137 -0.95642347636031 -0.673767102541841 -0.603620664767255 -0.952833333674225 -0.94189412344591 0.044056197200632 -0.780839966950707 -0.949431264221287 -0.92380238257787 -0.641421809952124 -0.891927317874594 -0.92265041317527 -0.862325634291192 -0.780230731260677 -0.85224738491407 -0.853338651568489 -0.812061453091335 -0.817278291558169 -0.83920452966186 -0.823336273877993 -0.705537127500503 -0.769255590146427 -0.861144866649575 -0.800297368026832 -0.781400232018863 -0.84615784541589 -0.744901684265129 -0.51201838096702 -0.79968882465648 -0.659203069392391 -0.770320762493624 -0.857689215301731 -0.722082854801591 -0.813425713523469 -0.854746381798194 -0.800282067895407 -0.733444882621325 -0.825908589099953 -0.839035718865799 -0.756584699740741 -0.72812114065527 -0.856405506952062 -0.76404227269809 -0.392746455460531 -0.105517461696689 -0.233290976037089 0.231290213324963 -0.0946709569512987 -0.44685067258393 -0.562636299079052 0.539440599376562 0.8080535171235 0.426014601753204 0.7515028461481 0.905657789227887 -0.396778618631734 0.740277513389359 0.73447531081467 0.630333462510898 0.64621586360576 0.682017240216672 0.61513527466092 0.669742499642359 0.715372271010423 0.674358918860011 0.602680065340615 0.623905174418837 0.752851276490238 0.621554506952278 0.367929008916885
-0.263450691662444 0.335506760016299 -0.370300555711062 -0.384127226277748 0 -0.448181353573468 0.0360328383699375 -0.0755154039624348 0.00668618225513081 0.0778149469356876 -0.228915184438155 -0.165187197405253 -0.23823013110205 -0.244548817701457 -0.181980249056507 -0.38672868334999 -0.452411566427459 -0.249594862506431 -0.210230536662679 -0.300073731012617 -0.457717424229312 -0.356757807112821 -0.321957166187284 -0.32702606340815 -0.383977841084713 -0.45663360282755 -0.407539501067878 -0.353419629061455 -0.431999470157788 -0.390587406791602 -0.468043911227442 -0.330231641442361 -0.364938575071194 -0.0095305549772772 -0.257596799237006 -0.230013637822672 -0.177875511704477 -0.0784168218319936 -0.0772094259432034 -0.532155142052202 -0.494707134609286 0.0291219225573032 -0.557499829236061 -0.643178288102447 -0.169325992388973 0.00902306811324013 -0.137844862891877 -0.206971311720733 0.083066279282226 -0.322750329094924 -0.401694230015116 -0.392958750499842 0.0523803722534966 -0.576759106523737 -0.411620815415941 -0.318071806794557 0.1963717569762 0.218024522755296 -0.148494187052332 0.105444630368347 0.461703414553306 0.274281573764404 0.153778830263776 0.557375336723529 0.556721026355847 0.267867653788695 0.397926121622812 0.39874462667708 0.691746215886023 0.701870022162414 0.617296819194095 0.258809363434716 0.515986960963026 0.695945869119363 0.0879898724043486 -0.449943350966799 -0.20325767710264 -0.186850811049093 -0.622259580241244 -0.709846406866717 -0.739907602552793 -0.768192736303386 -0.808578486052322 -0.803669927561602 -0.777173255719591 -0.934131002768778 -0.934620415503892 -0.939377968082033 -0.962426622742819 -0.966436879068989 -0.969398051339278 -0.967934011157534 -0.976766993114863 -0.975843098421938 -0.972779100577436 -0.963212790441612 -0.963297852937615 -0.965099750246088 -0.96879222278842 -0.964864175018273 -0.971431934540137 -0.976372637788185 -0.93855731379222 -0.946617064804292 -0.961290538355109 -0.953413106929468 -0.968708699216392 -0.103407259077559 0.806680596543388 0.817029378980823 0.854765186911445 0.991489010949005 0.85065077653563 -0.403977178639658 -0.56737106714161 -0.0213148533221702 0.0294711555146843 -0.618432531013518 -0.600849088104346 -0.161025179850596 -0.583570170522273 -0.871578660061481 -0.724998386842425 -0.314175485331338 -0.856279716072381 -0.925923843403159 -0.767815532388117 -0.757880767698979 -0.965241642932817 -0.963631923849341 -0.589510594157941 -0.78514634937346 -0.956853714150234 -0.896370775467441 -0.730902716736579 -0.736918561760677 -0.681248732111496 -0.640111179308849 -0.54703163427397 -0.68656157155492 -0.481149224145648 -0.614190593331996 -0.55257128127043 -0.599665655140416 -0.377521650499852 -0.584668241622299 -0.584549770234581 -0.327696799278946 -0.303458446405901 -0.247098844246312 -0.069112071310429 0.0157946575577671 0.00684016700860433 -0.0345782063159206 0.263144635754286 0.5031186836422 0.765335141975173 0.755695207317576 0.385557602448365 -0.199292459163811 -0.469072169463429 -0.680820723059683 -0.60658869200021 -0.733486713696195 -0.76884253657861 -0.659780423298713 -0.804409690792049 -0.858602134450842 -0.821298230401466 -0.848011582118967 -0.922142485603641 -0.939207668079015 -0.939014434752511 -0.932869446628809 -0.965858091013781 -0.963342053869415 -0.936860966925601 -0.880344338293905 -0.923357247274029 -0.948954705001708 -0.86764686577113 -0.766088988935772 -0.929160575477805 -0.936884493022638 -0.770237984400178 -0.782513601297908 -0.934073668949123 -0.908621877052404 -0.660038592323906 -0.790837916795708 -0.876691698521087 -0.802631415583451 -0.775712593551705 -0.783246329021259 -0.633784207628316 -0.238795231520929 0.212813224889461 -0.683183969954251 -0.945109183942551 -0.823445917950372 0.0721959067185224 -0.907030969605822 -0.95149547325824 -0.510244077062507 -0.383551359502448 -0.949849881771464 -0.942098574235749 0.342707809920044 -0.749284824626469 -0.961343080805509 -0.934407521863153 -0.56636809406097 -0.896748528225454 -0.934312063821809 -0.886934313546049 -0.784955136294147 -0.856942599269803 -0.853128130165088 -0.814148970211587 -0.82139892116227 -0.839905656819994 -0.826945792876103 -0.687358486023948 -0.749615158841763 -0.85745331107223 -0.787693656653148 -0.762797420525903 -0.839552243993541 -0.70607552799157 -0.351610798234154 -0.696752662548326 -0.556920778377179 -0.714861728366046 -0.832783693230317 -0.609550948389842 -0.778479205799987 -0.852289799435153 -0.789180743976489 -0.707869323278749 -0.837353025745675 -0.849236385709491 -0.759528140618815 -0.766787031284299 -0.888272030145693 -0.792783158755251 -0.410520580741022 -0.0777246857296658 -0.255547649576314 0.155187984099699 -0.342339541737033 -0.524976058743639 -0.725017465424656 0.237725624155467 0.651819180139719 0.0751234393899602 0.210195484566103 0.756424976272912 -0.597017586850316 0.682411466537284 0.628729191741694 0.570356233677358 0.571931122053762 0.591298188406393 0.490675287747499 0.580029170540151 0.63624528681827 0.571916994193548 0.490947663532757 0.550234419530538 0.798932438260238 0.539246566839063 0.255793375092718
-0.33722092208327 0.112057317990095 -0.476135381695845 0.142094950455388 -0.448181353573468 0 -0.547889632926993 -0.177095649705171 -0.0277301486722637 0.435140787222192 0.247944763893503 0.218949977768434 0.0474632695348905 0.00694986936108132 0.104544852867536 -0.0189779232973161 -0.166926324265726 -0.0540891706423318 0.0839528018734058 0.0240130173358992 -0.241782129530215 -0.217957815197109 -0.119628920906955 -0.0999093659212472 -0.221826793922104 -0.324626342605799 -0.247181935392419 -0.160761064334162 -0.30208860659085 -0.215851067323737 -0.289996383877318 -0.161822041575864 -0.136970241161776 0.276351725856628 0.15720962692575 0.0938330742791033 0.0892895168856596 0.289175733407124 0.41041500547869 -0.0764720467470047 -0.172503501643712 0.538204905222763 -0.133140583328948 -0.452769907584036 0.227444529975067 0.460516176516261 0.354771041958642 0.238875691537767 0.529549414678931 0.0411145240438467 -0.0409576856534314 -0.129290459804043 0.39338210339992 -0.485637886268593 -0.120455925486129 -0.151475148348306 0.408263346290125 0.405507968095563 -0.280716470207438 -0.129254099249042 0.503516945953862 0.092609073768573 -0.300722206698067 0.0729841603082246 0.289088603155455 -0.157794092732761 0.229758359072554 0.412456332489882 0.761050693201914 0.825422669526252 0.776791309994475 0.597136180993546 0.771172373278777 0.804782715411096 0.397025210333514 -0.130783326274156 0.166629674621861 0.114656188624714 -0.562887411224339 -0.623696407437443 -0.618216568791965 -0.721480632202438 -0.789671888767745 -0.7537490923464 -0.796949471328027 -0.907573539247111 -0.900924873107049 -0.908525097696565 -0.955932999018006 -0.967099682453879 -0.959443370472594 -0.956697256275783 -0.973417004577416 -0.968569670699006 -0.966911640702781 -0.965975629850042 -0.964021625926095 -0.963550895266136 -0.959319050295554 -0.956388616521207 -0.966598072020376 -0.971891504468137 -0.910338353955388 -0.927778797063088 -0.950893433149363 -0.927716047150014 -0.971182868318449 0.0939727560885451 0.86268446050385 0.864891837511326 0.893242264323606 0.992470248228167 0.904188044280941 0.124414217697893 -0.0915135133331814 0.433084673930971 0.533853893302851 -0.0287059287720395 -0.146102696329695 0.476123017757403 0.218906595811989 -0.759538580644398 -0.367758936394405 0.499989236665203 -0.632026227741281 -0.864380915651188 -0.456766254049984 -0.323792661006732 -0.90132884582347 -0.904172741891576 -0.306509486849083 -0.610709375992848 -0.900767309645468 -0.836266356441205 -0.57400510523847 -0.513898233280754 -0.453346442855427 -0.285715454927237 -0.179426141131511 -0.362388063894242 -0.272478657289585 -0.327651847100168 -0.213133942248847 -0.339481619901943 -0.174836405141243 -0.505295693286253 -0.509016455304198 -0.166316280036846 -0.219760374854114 -0.104991513777764 0.127648952365516 0.136920449100003 0.12145876291713 0.17531472112236 0.386785824616597 0.484519818980088 0.697831503042778 0.64046546106477 0.35121889353612 -0.0583430566490016 -0.39614257549299 -0.594483354937233 -0.441189198746749 -0.592966039814677 -0.640293107014147 -0.557340989367303 -0.74397381273453 -0.785273647955337 -0.74248816752281 -0.792461011505047 -0.865114710239594 -0.878385533317397 -0.887564822492921 -0.900275752746085 -0.944057764706615 -0.942909815373097 -0.888743132924823 -0.805650118330527 -0.888356110699467 -0.931417112125618 -0.786852849429387 -0.655765698428416 -0.91535702698629 -0.908665392411761 -0.598417512993891 -0.681432585132739 -0.931894529028218 -0.874084567092455 -0.386867714592376 -0.70418914816974 -0.791531781293224 -0.56505063238953 -0.57411621696492 -0.570871963736109 -0.287502718322086 0.110106534525005 0.459416986425891 0.405144150925382 -0.860745745462728 -0.489345453875031 0.812665176829182 -0.576101789891439 -0.912240053941276 0.521375481754529 0.71175746139006 -0.919147644730928 -0.925868524974063 0.863793136624926 -0.0983608215153528 -0.954337037900071 -0.938539757911134 0.0106274396825436 -0.854167723438173 -0.930291214322767 -0.871450849267066 -0.685888084057073 -0.802842191163293 -0.81345403811196 -0.755699523408078 -0.7660471289293 -0.788484356717733 -0.792174493394585 -0.653589367637458 -0.692677536316243 -0.802105762230666 -0.750409899078432 -0.719492560201937 -0.783972712546634 -0.61959598191316 -0.227370999711367 -0.555386728694517 -0.481694891418697 -0.607694296307775 -0.720181809387709 -0.501168284711689 -0.711863330414572 -0.797111545434255 -0.734313646190071 -0.68105237310832 -0.802392584017306 -0.812661469715825 -0.673919871901667 -0.752213125241579 -0.883231239530503 -0.703887177574454 -0.117447575142812 0.176594617861446 0.159336395492124 0.655675545831798 -0.0347869701813204 -0.37426062493778 -0.649708031216981 0.663983993158261 0.816349484205666 0.467860989483333 0.646063798836214 0.634158776132222 -0.751073677361445 0.680009895150871 0.605745453274447 0.574852982037909 0.653302559689771 0.555429175120899 0.435334809924417 0.615071431586975 0.651638507372053 0.45028450652936 0.381857977893241 0.439885361342479 0.647416212177517 0.489028094688827 0.161474179928032
-0.312555121218025 0.128487517449601 -0.293108118988887 0.460008033202255 0.0360328383699375 -0.547889632926993 0 -0.39119593382457 -0.478228169859614 -0.365825096369677 0.139999378123858 0.123557911085027 -0.325675463167044 -0.181144698905485 -0.0189662302854279 -0.234662323522029 -0.342994270996719 -0.114724126669784 0.0481477619686598 -0.0746362094063086 -0.302152702982153 -0.275910509945678 -0.23929447145414 -0.165018818942194 -0.242332368625608 -0.371608782427963 -0.323934971726469 -0.194471788168619 -0.324778756516194 -0.21515939115194 -0.324769584803 -0.199878357197792 -0.207786605696807 0.24381169524341 -0.0565494359120357 -0.0812342411135275 -0.0693882284625088 0.131337276036407 0.302294781994789 -0.325212000189392 -0.403662015647182 0.347241514167051 -0.34511881883128 -0.624455106926415 -0.0538509165432778 0.262557170501027 0.095770521710591 -0.0210374548437983 0.289180738782036 -0.158993391932937 -0.274053832162147 -0.273467449071196 0.178645906721061 -0.593423934677966 -0.318054621826893 -0.421419882023069 0.0766011883761108 0.0577062573259419 -0.485049239626574 -0.385853619224928 0.126964795455328 -0.263818879148432 -0.429336265782627 -0.0966744808586603 0.00280305212943749 -0.277125369989888 0.0545358406667484 0.173924519401026 0.677913930557444 0.799784029567369 0.726107005875176 0.49317964355061 0.689988753293685 0.723774203795646 0.186996233795669 -0.273320165083018 0.0134546158133697 -0.053093200627803 -0.651005687616513 -0.687154012381332 -0.657500285691425 -0.737158460752489 -0.823950338616129 -0.775437930693931 -0.811261928477109 -0.934479873063654 -0.934353171535921 -0.924256038643111 -0.961340820990393 -0.975605160012985 -0.973355320310983 -0.967830890234167 -0.980000948714638 -0.978784347773531 -0.97330909667364 -0.970083395314921 -0.972443456356459 -0.971117971655834 -0.972173465031864 -0.971879861279932 -0.975790725146099 -0.976741148563684 -0.94475268699682 -0.955393776245764 -0.969413679478488 -0.949465752732811 -0.971873390469443 0.096549685789899 0.887072797344918 0.89866851626476 0.896005871608393 0.992392782314879 0.906292882757437 -0.0250210105345804 -0.144742829741018 0.427825276806671 0.543980513708212 -0.108010836177721 -0.237724800097636 0.437435399076284 0.133592149152677 -0.781410200053285 -0.468343422111236 0.415136623886545 -0.679271062272357 -0.881697634884462 -0.547607750721908 -0.414754240874575 -0.917860498156728 -0.917871527479913 -0.366983171748156 -0.649084889701205 -0.921109275491776 -0.841301762145871 -0.642148536182324 -0.632448874684867 -0.584302438187944 -0.43131109858027 -0.303357773674243 -0.47945624022436 -0.418608092202009 -0.475420503520334 -0.370782107226314 -0.467222330294899 -0.272252131269183 -0.583066583410313 -0.602957139137785 -0.276915571867131 -0.304677765884956 -0.23064585261257 -0.0026766018002139 0.0134463878831861 -0.0101268341806188 0.0107825813871527 0.264953513325707 0.382078130388932 0.602414807929303 0.520308601947095 0.248235591322811 -0.175093766205092 -0.486434696042562 -0.665973654442318 -0.596375379819096 -0.733547184989758 -0.769770516583167 -0.694761222918463 -0.830566138095191 -0.857498417475411 -0.82684022887546 -0.860175648165992 -0.923423505645441 -0.924304139807028 -0.943086406058444 -0.948394258844192 -0.96837329724536 -0.965876507715062 -0.944348911739389 -0.896764231308506 -0.937613108489282 -0.955774479981024 -0.866939396714885 -0.775653781787134 -0.950611504065276 -0.94828124274238 -0.720011587658816 -0.797526774101164 -0.946676310845538 -0.8999246447042 -0.479834700278226 -0.755591871030687 -0.793306561335982 -0.528607468755629 -0.535981305288974 -0.536187991537803 -0.314274781544929 0.059135127956024 0.46480049747528 0.34468185496588 -0.853023919475289 -0.699567756361139 0.874717761508426 -0.655084039700192 -0.925882639360023 0.360199295548099 0.709930343503972 -0.936261562302592 -0.940505927067108 0.782164080353936 -0.420045433668899 -0.952910929839709 -0.94935537023351 -0.400371577561593 -0.90203261944367 -0.936688470610617 -0.89541983684819 -0.80415922992181 -0.87997195860163 -0.880994394215757 -0.842302662222813 -0.845506522721692 -0.869508521980416 -0.857046154738707 -0.70415079931996 -0.748036963661584 -0.870221283218958 -0.800159572555851 -0.770001395682493 -0.852358844310731 -0.715725098500667 -0.246550375945568 -0.612797741956182 -0.54732869920823 -0.712725053828241 -0.839868952695287 -0.593665679163139 -0.802713536226911 -0.880699295565435 -0.819961799535748 -0.745204292933618 -0.874158636504769 -0.88482841479075 -0.788139670810267 -0.815310808710343 -0.924254525108262 -0.808513450619187 -0.422130898165503 -0.227453388035881 -0.142713250837487 0.431324517717409 -0.154097627952309 -0.488164067032111 -0.600552136690068 0.727734956598354 0.865515594019091 0.593131953845911 0.857012814091489 0.851319283917922 -0.783044392157197 0.661802957892234 0.593602948795988 0.557258726574128 0.660757807462271 0.585991011900996 0.465476360730256 0.648235521030444 0.707178996729805 0.531905149135432 0.507232098259209 0.581382198359409 0.741840633313278 0.544909976489801 0.222741253419971
-0.380045977502391 0.246713370125055 -0.420889156100107 0.254536167073377 -0.0755154039624348 -0.177095649705171 -0.39119593382457 0 -0.55144601553871 -0.581951704547338 -0.559531624377043 -0.119148167434154 -0.506297035870037 -0.411143000788862 -0.206234524076162 -0.489355893199531 -0.596084106934269 -0.304763748914264 -0.153922079573628 -0.285780948248757 -0.546535814565342 -0.371314859687127 -0.327333228011849 -0.354076009067014 -0.369321216918462 -0.472282428606373 -0.409128540469768 -0.352802833041535 -0.425382165512354 -0.28510218661182 -0.415355407572358 -0.215005260415079 -0.256003825200624 0.0683793531036811 -0.239451260144011 -0.244368727247795 -0.187337341869444 -0.0552411861295984 -0.0313883581039152 -0.508792501047126 -0.49263490722539 0.0371400700269161 -0.587975876986006 -0.671204666917009 -0.221665104912345 -0.0122093574757543 -0.195197625151332 -0.23547756894549 0.011544815743823 -0.42802154241834 -0.4932723667865 -0.482924863744967 -0.128451807358917 -0.727700790025004 -0.554786785301561 -0.549367450299187 -0.0345746351605591 -0.0156774895996526 -0.415285715896413 -0.104476910114555 0.316845876802172 0.0761118371749673 -0.0250222279881368 0.417252369348629 0.37578001949847 0.147379839583536 0.35532334022837 0.370918202425835 0.718988981895968 0.787203660241231 0.705373765055497 0.354881540467855 0.692597691832459 0.804599676855425 0.057180273703474 -0.513032538081216 -0.266262899061031 -0.250511398747348 -0.710888656730392 -0.7818646528641 -0.787992822387054 -0.766689944422283 -0.822269317672708 -0.794727381674674 -0.780409245551971 -0.925419286646907 -0.930624399627374 -0.933855348374419 -0.957095220471939 -0.966784725214128 -0.967176631746267 -0.966711643780533 -0.977598213970082 -0.975506561659106 -0.972013509437392 -0.969731372534911 -0.969874413072813 -0.968513120586493 -0.971476997244334 -0.97316284218444 -0.977212886050175 -0.978923110139091 -0.946417830224112 -0.956607124719452 -0.967922915434693 -0.953518231988662 -0.96845099656487 -0.00245435502983938 0.855948554112917 0.874395356874969 0.865969210920565 0.989588251454897 0.865731186140803 -0.329894084147882 -0.470430278894547 0.126281953937551 0.213323356556863 -0.537994698837725 -0.54050315468781 -0.0106336353159915 -0.486285092794449 -0.863391166387603 -0.704844899882541 -0.173333898902931 -0.840163289936048 -0.92483612179609 -0.764619688485515 -0.733908969409581 -0.962778887677689 -0.960297719438712 -0.567616561193537 -0.788915797322755 -0.955936081698016 -0.889152976639055 -0.782817828470182 -0.802847762450602 -0.729243269589657 -0.683263982126177 -0.584316742683297 -0.750868856057659 -0.590765383867353 -0.648861778736318 -0.561886102785845 -0.62989694054548 -0.380296562803632 -0.63486103829988 -0.652052287137257 -0.400468002225247 -0.362922037335973 -0.340733815926137 -0.150768484829362 -0.119681007925947 -0.106428148836511 -0.171102167950235 0.153527597734787 0.393706448421552 0.715551198486889 0.666274880387318 0.36137535669647 -0.251416347969892 -0.490069041419103 -0.681926234806851 -0.664557691454751 -0.777842266329111 -0.798530067222617 -0.712667396246883 -0.842907240519029 -0.876109919653052 -0.844777743599059 -0.863671584124906 -0.930952731403154 -0.937040475081839 -0.940164136939827 -0.940505496729318 -0.970863318673892 -0.969286191757713 -0.941806350163695 -0.889989181442594 -0.93176410442883 -0.952948797585109 -0.868206881502441 -0.777288063934937 -0.942620184846763 -0.944619364396613 -0.736325790971035 -0.794464334541116 -0.941948413063221 -0.901334529045986 -0.537412673701216 -0.766041906114683 -0.831032509854495 -0.618044345538844 -0.601909061325196 -0.62201751920459 -0.417491819718181 -0.00112570561166861 0.374283055980886 -0.186322288032887 -0.903178389088116 -0.787777107156812 0.703117263290611 -0.826871741623484 -0.945389291448437 -0.0867895940438502 0.25183779232338 -0.945774635431621 -0.944318717248289 0.60023322191651 -0.63143221101701 -0.951755909792532 -0.940784865617392 -0.538792857965769 -0.888271098266964 -0.925703483164182 -0.874099788121948 -0.783454370090636 -0.857810901557771 -0.855626075973992 -0.815235135114813 -0.818104641518144 -0.845554153589425 -0.827696699664867 -0.68559726589461 -0.733739349330697 -0.849639356581618 -0.787098235303837 -0.767801375630425 -0.850838625258464 -0.6920129136469 -0.167426721900568 -0.593477967031158 -0.487406976709636 -0.669114900534182 -0.809078650326468 -0.55977966988041 -0.748568852820674 -0.863007436386772 -0.78348999743414 -0.682119677708795 -0.837397658697072 -0.855694472512608 -0.74997046444569 -0.74527696145483 -0.891580653036555 -0.774358300748663 -0.463615442128209 -0.242364380660211 -0.252022466035695 0.156241862071116 -0.239817183809557 -0.476829085148858 -0.613653770924614 0.571762006313585 0.827845934247513 0.481534267827919 0.723964136123517 0.848216547504822 -0.636092792109033 0.716635087149776 0.640483641658781 0.615950479234629 0.642243129833182 0.614654185461708 0.523596678076371 0.676993458628182 0.723295007753549 0.630305139065045 0.563086840017453 0.617960502208413 0.799918334460587 0.550244725484019 0.310465276184675
-0.283915682436294 0.311248592979805 -0.505274832379647 0.161941541832717 0.00668618225513081 -0.0277301486722637 -0.478228169859614 -0.55144601553871 0 -0.592515720465757 -0.430737497156098 0.0932616192991011 -0.444054489143672 -0.485084635372404 -0.0618580683338618 -0.324279710108691 -0.630164823083625 -0.398935942256533 -0.152768891430991 -0.264215101824367 -0.558208417791435 -0.435319167685904 -0.281428326116789 -0.370298304967761 -0.46500765062896 -0.515586228674397 -0.389262270596113 -0.385427238454565 -0.515511009876546 -0.413409165130808 -0.492274425509075 -0.271937049822108 -0.241834242462354 0.153034054327795 0.0172461296328125 -0.00488200072588102 0.0505682958714025 0.175969251912881 0.220204928785985 -0.246537569288102 -0.283808765997864 0.307420818477684 -0.408332485026187 -0.543759654272068 0.026142047993493 0.181792597488934 0.0757123203334036 0.0252649019643098 0.201538652027102 -0.327298377730894 -0.334832730527586 -0.396322233498684 -0.0980652020143325 -0.726509009452973 -0.466717811858577 -0.446367322956011 -0.00138901422901433 -0.00722260615711453 -0.363344951908096 -0.046512065157804 0.25419691537133 0.0205892223606085 -0.125668086546339 0.206088955145104 0.253762047406835 0.137921319639325 0.410871697124917 0.431717473429448 0.717461956587905 0.799771391131382 0.740332295609842 0.449065376868015 0.738750549291831 0.827611656797475 0.184729635758401 -0.404811180975858 -0.145266082203416 -0.119655838404984 -0.654203932746673 -0.748784384216026 -0.755948346932291 -0.742799415937628 -0.816805237483307 -0.797264891255061 -0.808828940110504 -0.938986637602115 -0.937870475539192 -0.936481042625311 -0.968290299759965 -0.978974851876144 -0.975556018135131 -0.969955649919301 -0.983328019118417 -0.982118602897244 -0.976010630896501 -0.971869975378301 -0.974178311171383 -0.97336235172352 -0.971417369213836 -0.966313042204103 -0.974906967047781 -0.978083640575742 -0.927073823548458 -0.939360222299352 -0.964144836067361 -0.945019944257614 -0.973525739326166 0.0937484095720326 0.873133927514869 0.88328553129705 0.899306316012392 0.993206974645443 0.908758284380834 -0.0291960026391926 -0.318341949316158 0.226273951087946 0.329158670630946 -0.342591963689845 -0.369011952344623 0.194354945891202 -0.214499279082381 -0.833737474525729 -0.599644127240146 0.114353994086634 -0.781045140507291 -0.909668419892438 -0.676173307933153 -0.620611296846382 -0.947365113478435 -0.946334927876911 -0.459956321256829 -0.716499309304759 -0.940242089576084 -0.867849864289989 -0.723302313323445 -0.734694043295035 -0.641985210835976 -0.553505708980344 -0.469520154154426 -0.65101908276821 -0.480197141342786 -0.500873207519947 -0.376921311045081 -0.489478579787961 -0.261171531518101 -0.552025539374889 -0.592825732172171 -0.275723623530856 -0.283379050396333 -0.198287382279723 0.0220199771758229 0.010032797212806 0.0282656543494567 -0.0376350213700682 0.220626680805802 0.409401718754983 0.716448033847879 0.653573007690662 0.414940962030777 -0.0385666768760131 -0.362416080903478 -0.60319995495077 -0.569298310931787 -0.720192563707247 -0.756707847477791 -0.662378320382588 -0.823077111527913 -0.846719560373644 -0.813869968694878 -0.840208931519744 -0.919340244504341 -0.922708358433294 -0.931837849603031 -0.941322085338639 -0.968977257077775 -0.966652842971707 -0.940074843293911 -0.8825494615365 -0.933976194353997 -0.955633716574267 -0.838737606167602 -0.699699027534214 -0.949424062172611 -0.940772356205477 -0.500975773460008 -0.699826248895443 -0.946770446984456 -0.882621354372982 -0.0192890940546233 -0.668550466789204 -0.672823922388722 -0.152461355559336 -0.202052364399433 -0.307213868124573 -0.0329034671742562 0.315382946300619 0.581040075785143 0.779152971532819 -0.676337028554839 0.360999706628278 0.912083388719529 0.372010658886173 -0.871783276451391 0.892740127391291 0.920961125833043 -0.906753235823373 -0.934571553355754 0.95683990279658 0.608464311170614 -0.954754942833649 -0.961110226004506 0.573534798771789 -0.86722785171565 -0.952538315191576 -0.916921985146865 -0.752265273772669 -0.875058158655409 -0.872507397659134 -0.828018056203722 -0.835738483794462 -0.860155015177616 -0.852887290299572 -0.66210026973275 -0.693101198246382 -0.857485454578567 -0.785947464705306 -0.755554780237215 -0.842495472605772 -0.625852087507646 0.0810013209696907 -0.433774700151994 -0.348669646298351 -0.56406456148709 -0.707477595761934 -0.408886331250458 -0.686582335244915 -0.848458140229495 -0.778148798607987 -0.676268484266357 -0.873872438498767 -0.897749578351273 -0.753457968060687 -0.823915753936916 -0.946672527800061 -0.754945573794306 -0.119865103553089 0.509981232583705 0.561533634532517 0.696328700242728 -0.000843430796707442 -0.307825709497821 -0.724409525558814 0.572686176108497 0.838583077221584 0.566785309536794 0.582073845400972 0.30109621716843 -0.799474080852689 0.767579772804543 0.666156312965989 0.631592471245756 0.656020164869636 0.581108763683835 0.470583710882013 0.65912353306496 0.66930158390408 0.452360300229557 0.392417233017562 0.480631000497066 0.759190522624494 0.50484092501199 0.200595189093142
-0.231939117511745 0.295558785697627 -0.180708284717062 0.317156733618141 0.0778149469356876 0.435140787222192 -0.365825096369677 -0.581951704547338 -0.592515720465757 0 -0.275064314162513 0.175830916702505 -0.00179807908291268 -0.330357517589639 -0.214275753023643 -0.0910711101430347 -0.352797054527922 -0.382582911676436 -0.217773847846821 -0.133502128517172 -0.418197688071632 -0.494564055355143 -0.373245445421634 -0.234965597976445 -0.419821206663762 -0.52912359527968 -0.402832232432485 -0.30772304004802 -0.49420253324878 -0.457358401829549 -0.49423614593241 -0.407488864415471 -0.337409401408804 0.235765700104186 0.0997543990719828 0.121365874651355 0.109236626597678 0.269657053373812 0.502544164763999 0.00128857826681197 -0.206827386653288 0.506460746323409 -0.0207983876610873 -0.464378079061266 0.136040858855669 0.463740677336325 0.442366453139082 0.292193579957884 0.502727560926015 0.110126090546226 0.0230599921482734 -0.0539434008193444 0.451237112005427 -0.325260738530508 0.249967306675121 -0.0180216877798952 0.434541007157438 0.381641445211959 -0.108573372634359 -0.0332735317166945 0.25634445694795 0.0597489647274054 -0.250178555633933 -0.0563116196902807 0.082934732442464 0.0151467231317897 0.509587718789131 0.619389730666613 0.80825228517389 0.892074916620316 0.868949719362986 0.739817711406026 0.8678958262813 0.890294519422623 0.609917719746992 0.31769826159939 0.504277869853243 0.471643817911957 -0.109642062497334 -0.317263768944795 -0.37086672767014 -0.37176423447478 -0.572812113062134 -0.54806767242235 -0.704380585559543 -0.917687039335657 -0.909425985861837 -0.88427849273435 -0.956278434957645 -0.976445628246621 -0.963334593534279 -0.954062210422257 -0.977237228259358 -0.975071452448642 -0.964827582183406 -0.964863081834532 -0.975191962508498 -0.970333358731236 -0.966694463214449 -0.962583377141151 -0.969584252368855 -0.970733900580439 -0.92693937812126 -0.93666072198631 -0.962299610108608 -0.931654516642199 -0.973946384983768 0.196164139007172 0.899463828855733 0.906004190790422 0.912153917888191 0.993853678424297 0.918039286841401 0.305613625536916 0.169450218429863 0.555612647662999 0.672137636507475 0.332902096685812 0.149251450992617 0.628062209242648 0.540298560520535 -0.494263991393629 0.0315823448995364 0.718564794275405 -0.251575062713628 -0.753812482429186 -0.0450771474985717 0.266615143318452 -0.844502679060498 -0.860390064120144 0.121831319326216 -0.274062746282255 -0.883687078675323 -0.720705692043845 -0.324512960000352 -0.321683893046991 -0.199949389501212 -0.0022117817603997 -0.0163604813997651 -0.163797149806488 0.000855077528314272 -0.113852139604464 -0.0330370976475027 -0.180483610107679 -0.0448608367097208 -0.371129040112014 -0.454946089659719 0.0356549367059053 -0.0975742105639326 0.123618616700926 0.391042672737088 0.356705801343086 0.356424736350011 0.367076962155418 0.5347797820226 0.606561380270767 0.766343703235647 0.71612354750571 0.580591698611389 0.430659272528965 -0.0516641583717644 -0.369865465614777 -0.294656500713041 -0.527509129779489 -0.616128064053745 -0.55280843485606 -0.771021553711887 -0.78216117240621 -0.763525735540746 -0.804664593639999 -0.884987067622172 -0.883103491092168 -0.895317297824237 -0.920004303155646 -0.955970561827937 -0.954816496109928 -0.921676507960115 -0.863640890813813 -0.918318836602524 -0.943359436545876 -0.78553726088952 -0.651680231594926 -0.942361837393957 -0.920816566036385 -0.298357958831141 -0.666954921617009 -0.938149362624729 -0.836946845457574 0.179828080142605 -0.599456347320632 -0.535136455306283 0.0567081680701717 -0.00672089706835861 -0.146699975642416 0.0784091387137528 0.364132386653511 0.67633650025449 0.914246699489055 -0.218270338229919 0.735682163280502 0.957439726394421 0.85918171884507 -0.762571868925906 0.948893142914693 0.966852143968258 -0.708493192467765 -0.909060975398075 0.973756393169762 0.853803647192365 -0.91990275213978 -0.934043579402571 0.799913717726317 -0.817916161467124 -0.952927279507388 -0.921399637406506 -0.759037610596655 -0.885167123887537 -0.886708048035449 -0.833834704344808 -0.834865945427471 -0.870572601523932 -0.865803508483698 -0.649352295611002 -0.663945536848332 -0.85840065511295 -0.78587676572346 -0.746126234861333 -0.835018278448161 -0.574969137598924 0.18719715387181 -0.38184054332954 -0.323141733772299 -0.533574651518998 -0.690586260967998 -0.346734705090984 -0.700487287667075 -0.858197771200591 -0.777759635059509 -0.673759829233458 -0.889022541047243 -0.911077441836817 -0.74086577980989 -0.850549980732112 -0.934250958518374 -0.602668573143939 0.0310471852304371 0.126495724879993 0.560208971977012 0.7385969297343 -0.0124249770595933 -0.46156300453276 -0.653642580309997 0.685619867261506 0.881825370347729 0.637217601238676 0.873363951327114 0.230334689536478 -0.922665572907057 0.505240194963041 0.387886040256035 0.27406638209923 0.419099827539256 0.31920006808981 0.150318868532816 0.389491836202909 0.409111699827753 0.112353555238433 0.0658013282168337 0.225361785001264 0.495726292061811 0.33852794816264 -0.021096308863626
-0.441227905840412 0.188863828291564 -0.196407913426842 0.216464831476135 -0.228915184438155 0.247944763893503 0.139999378123858 -0.559531624377043 -0.430737497156098 -0.275064314162513 0 -0.448121041535705 0.00484474460759154 0.0598304417251256 -0.12249226496881 -0.306557464999349 -0.202162759125417 -0.0105716214788182 0.0205519214237495 0.0227451797880932 -0.188884447564129 -0.26549465828476 -0.310295030004259 -0.108997071370536 -0.121598868105574 -0.422164773442044 -0.360935675284641 -0.101712379832125 -0.291505856182971 -0.158569694227206 -0.320813302012306 -0.222274846919919 -0.247982158336959 0.266400872794945 -0.148040694132152 -0.18328061721924 -0.16026933521436 0.0604256654954951 0.280005403775354 -0.460375971717004 -0.539750167558632 0.336743157559304 -0.494764246655469 -0.772176825228362 -0.163819550419006 0.367300162628767 0.0412769508610224 -0.111777343523569 0.375440436116271 -0.142736764149072 -0.399509044667788 -0.279851526442206 0.404662558409161 -0.611775465013066 -0.228812396716216 -0.469954359395126 0.161657192595668 0.0531474652675391 -0.390508938858749 -0.200644628673932 0.0930003902237549 -0.133016743045138 -0.336907087372866 0.000167018306851737 0.0656663543691058 -0.0758542205867819 0.374285900350702 0.468079780990869 0.773026410293482 0.86398530741855 0.823375998764569 0.651667403762419 0.842961324885526 0.882110317930459 0.454840895524185 -0.12412831968647 0.299786989098181 0.259883113743311 -0.535550611351193 -0.653440979299145 -0.640234129732008 -0.638006776719962 -0.802949222678124 -0.7581093273706 -0.800283217493794 -0.948021489642958 -0.9507085308172 -0.932273620363393 -0.96617050932182 -0.980773793241409 -0.976773526860492 -0.974296657152043 -0.986554100970527 -0.985827618296038 -0.979723691842939 -0.980525500331398 -0.984538655678696 -0.982737067321804 -0.980410239214844 -0.976618064858899 -0.98052848077657 -0.981774073902153 -0.946756703996923 -0.952852860794033 -0.968444548431642 -0.942981790963771 -0.971573312265389 0.109106429704174 0.902097211998403 0.917692972479532 0.900804987281276 0.992301012887752 0.916639922037089 -0.0546410856995303 -0.143356173147487 0.461115501448344 0.626674186426693 -0.102417131039913 -0.277739615419496 0.535631560664905 0.200721267948611 -0.79303137785844 -0.45984583498284 0.503464817844255 -0.710668536152466 -0.882618025721381 -0.560879872158526 -0.41492143130423 -0.931285043190429 -0.930994482001923 -0.301822198513455 -0.688743576176253 -0.939321982918453 -0.84876056203298 -0.643036149066751 -0.700455339107629 -0.627789850150675 -0.465234536484757 -0.343932855006291 -0.528855821038948 -0.451054568137257 -0.494735737602193 -0.425851157782551 -0.5127060808011 -0.33093223695437 -0.598650240556392 -0.673102960499853 -0.356692856161826 -0.369164748438982 -0.278578157450121 0.0332830582191999 0.0317204593487784 0.0518030000480982 0.0344935245197188 0.321301920583659 0.482341372765624 0.730220622008093 0.655238256600748 0.446557749346691 0.105749149199178 -0.402132700403169 -0.638062404874934 -0.666510859114308 -0.770521473529837 -0.819749514324248 -0.784364572019933 -0.881653776129412 -0.887848513218417 -0.869610892740734 -0.891637100810142 -0.938074721577999 -0.929824115227518 -0.949743375292837 -0.957772876640981 -0.973390554625412 -0.971389954225966 -0.953076228264612 -0.924507721015763 -0.955188371246824 -0.964109257788826 -0.900740594908893 -0.853957212127145 -0.970960566964516 -0.960253658734494 -0.744141650798782 -0.86935205861662 -0.963588448214386 -0.91619762256119 -0.413632576711058 -0.808947767054385 -0.777280686934615 -0.345848820308261 -0.398764181745769 -0.443488857001891 -0.168470962466092 0.211528312195913 0.606153300778912 0.877778843241605 -0.648976968491397 0.254379947402634 0.940373352789216 0.49092213901246 -0.89981533046616 0.885812180842152 0.935875648856419 -0.901565244537608 -0.949090746958689 0.925124516741712 0.234350073652434 -0.941851342388361 -0.948139882572793 -0.279770157197756 -0.894639651662364 -0.949646097219801 -0.926364500341641 -0.878160851951056 -0.919737708965646 -0.901210368612109 -0.88062995493517 -0.887110430857643 -0.906507306591478 -0.899613378030418 -0.751005122054728 -0.771878101555369 -0.89863063400059 -0.839503979038243 -0.813231935667177 -0.891076748068185 -0.737054828956938 -0.0249929120607831 -0.494307754341436 -0.494265883615358 -0.703863298829545 -0.810294479793872 -0.555811432848349 -0.773097492299272 -0.889238799208731 -0.858666935586563 -0.770398871158615 -0.90401770187842 -0.920490538827685 -0.818368936482519 -0.845993913974304 -0.937465545336241 -0.804689557081675 -0.571628933430401 -0.663322580279766 -0.434710865211101 0.289817900639653 -0.281176328580908 -0.59394473654273 -0.591606937169494 0.762484687734379 0.878874098782333 0.626120894168339 0.886737700942929 0.776820346685678 -0.87703375884289 0.552564988035839 0.483366339990951 0.481999653092248 0.599004174986656 0.488222594190492 0.422510426679852 0.733702956923036 0.740151206335919 0.499940025411777 0.568633045920219 0.715561966687835 0.838603727709446 0.628184659438295 0.264982319289928
-0.364821202479243 0.278960546627845 -0.286104377225845 0.217528138358451 -0.165187197405253 0.218949977768434 0.123557911085027 -0.119148167434154 0.0932616192991011 0.175830916702505 -0.448121041535705 0 -0.608352954808816 -0.288791314789483 0.0953693545717787 -0.563083288661879 -0.746983190151641 -0.262126161673364 -0.0915377384000284 -0.261296900588951 -0.597891777858689 -0.364060246838956 -0.308307013083547 -0.370858905237742 -0.410989466614436 -0.511472160150271 -0.457584111305347 -0.35643986219042 -0.47914612207729 -0.338424225799387 -0.469165419879648 -0.261259996408255 -0.28181115008281 0.137619710745045 -0.1518560576007 -0.188203318253296 -0.103101216697591 0.0529563635817315 0.0844207122910789 -0.528264235993129 -0.521922081477444 0.141328173498894 -0.65527619832067 -0.76176017266864 -0.203689573871582 0.0332431627357892 -0.23245536757375 -0.259146626211631 0.0348986613721479 -0.492075772712424 -0.593025494428588 -0.531311049319421 -0.303244721280179 -0.764086017195067 -0.601168012413107 -0.647717302436113 -0.226108868333555 -0.311441146100417 -0.429099443425184 0.0246619272729219 0.0241391753134302 -0.0791839267024338 -0.158597397262011 0.132682535498892 0.103123616528417 0.156896654889119 0.405352231612294 0.383195990550641 0.721734427184612 0.811103332985498 0.737410417870992 0.432972014912841 0.718933587424033 0.835740995954383 0.174284166539371 -0.464988205763643 -0.115793880000005 -0.0564994732264361 -0.668123335278119 -0.770770483548601 -0.76594874841535 -0.707526658498867 -0.831923151101213 -0.804599480789214 -0.813495110850131 -0.950943467593534 -0.955551612800862 -0.942175281958157 -0.966485546200639 -0.979826103830935 -0.978457501124654 -0.977114356653095 -0.986269620287368 -0.985979039848551 -0.981192493069099 -0.979461196998126 -0.983253676562159 -0.982796900261019 -0.981204548277379 -0.974914939345404 -0.979372569829273 -0.981530778294175 -0.947445498443424 -0.951014271013173 -0.969683594657141 -0.948831100692189 -0.971811482540781 0.0753139042076107 0.876414135248823 0.892154180324289 0.893177072538503 0.992841714307526 0.901059136658274 -0.191692730310415 -0.422140760914524 0.210326664723887 0.335648768536825 -0.533783449741686 -0.545719691722064 0.117523893938745 -0.383481524255415 -0.859089891967244 -0.692363425959249 -0.0413003949564868 -0.8533598683642 -0.922005272193216 -0.78660298628555 -0.766030144807209 -0.957242399437268 -0.953338317887031 -0.554187092597187 -0.813856785127801 -0.953710363345933 -0.884094875991315 -0.773628756701537 -0.820786900452145 -0.739306440491549 -0.648995765341115 -0.559445210534549 -0.707371627656768 -0.641131299633986 -0.617608714693554 -0.535919730454186 -0.61082022771858 -0.384187186927355 -0.655685562534468 -0.709295007067754 -0.458514462519155 -0.415821868426464 -0.391681417715361 -0.149945744241542 -0.168708417507834 -0.114835282960131 -0.201320144987389 0.0688377370389895 0.318382635252732 0.693141115183616 0.557306418453302 0.374543488682682 0.0144505242299985 -0.405288367761596 -0.645227458347877 -0.708093000008288 -0.795053901523997 -0.840023312615185 -0.798165548028048 -0.886356999928622 -0.894925714817061 -0.870613035998481 -0.889297536243848 -0.938381916400313 -0.930372093232206 -0.94843578098637 -0.956777330888866 -0.97272792300995 -0.970093480176753 -0.949658077478163 -0.91305524138766 -0.95101183841419 -0.959807727222829 -0.878634562299067 -0.819994683203334 -0.965652689332839 -0.949335597558416 -0.591619565257067 -0.816117113566677 -0.957008846558894 -0.889018489079863 -0.050508380384336 -0.728235192843632 -0.669894302376837 -0.0404116747238112 -0.115700170231764 -0.27496561071979 0.0217082939845097 0.368981215783294 0.67363261152724 0.925530399670583 -0.0846593580819761 0.799035423200511 0.953200460600945 0.900344210241356 -0.743762994696668 0.966687629369315 0.973698811471285 -0.715958293340694 -0.904776676362691 0.970992018099016 0.785492026067422 -0.905069745638514 -0.918470545855214 0.393617560314315 -0.800764841118438 -0.926729783588241 -0.900462890652674 -0.834889294959351 -0.889671216416428 -0.843438915617421 -0.836189057935131 -0.861612527238347 -0.874499250489843 -0.877197758699687 -0.726403204005317 -0.734812833794331 -0.871207750370548 -0.827884791261275 -0.803783801304349 -0.881787218535127 -0.667593978387919 0.145378254253408 -0.399993207128442 -0.319311971409718 -0.556643956813816 -0.710137905234582 -0.440715544149923 -0.652844330731277 -0.831080994050562 -0.806341701433905 -0.703203524254539 -0.84015195211217 -0.884620345797112 -0.768730511217852 -0.796719361840679 -0.914018784363496 -0.720873297288983 -0.530956252750917 -0.4788945764995 -0.0637663261143591 0.352979741112028 -0.182972556434067 -0.419558041962479 -0.684405706943143 0.635497347633563 0.883397951921043 0.604778965906868 0.743624951696799 0.112427851480988 -0.882031021172973 0.784743425572977 0.698556047590545 0.773181274759855 0.793618624762073 0.663605460408876 0.612746609982926 0.788267758699694 0.810279336417551 0.645774817688854 0.663747354604308 0.741197035533111 0.869395210345011 0.642799405719907 0.319499613604747
-0.344008753909424 0.124690107088487 -0.325482067679104 0.0835254760316774 -0.23823013110205 0.0474632695348905 -0.325675463167044 -0.506297035870037 -0.444054489143672 -0.00179807908291268 0.00484474460759154 -0.608352954808816 0 -0.512693158221759 0.0816364713487159 0.160836781444047 -0.528143806607156 -0.364331285843492 -0.0750433937337734 -0.0348041390914215 -0.515571299848333 -0.445820329242907 -0.235516385810031 -0.201727725419156 -0.445842245970748 -0.552174535381492 -0.376953141202403 -0.267969047811637 -0.508057170785768 -0.480372107811849 -0.503243455722799 -0.341977822420886 -0.239098744323336 0.364556256152965 0.304476501290417 0.239754762995155 0.238073696405096 0.388487938848374 0.566936919019273 0.146911749345771 -0.0136767647227143 0.584297302928519 0.000241457949888849 -0.410385629678546 0.270225953692894 0.522836862372794 0.426518399569636 0.307867003760184 0.553477713441329 -0.0728453808747166 -0.224410300635004 -0.206292285932689 0.196406525343507 -0.631259000555882 -0.0747988198755261 -0.48415985116256 -0.350261954428256 -0.421287871382423 -0.418317111228645 -0.350908579771127 -0.411448093754691 -0.41279287934969 -0.473197176472075 -0.416999379247163 -0.444707847626374 -0.227885941019422 0.146134426149858 0.24472001460829 0.677126560218175 0.812880309671133 0.758602963073326 0.654754059165276 0.832437651218363 0.878200750936919 0.458015739208608 -0.0385386451062284 0.345115547261927 0.334232804470679 -0.380658898756921 -0.601762214639766 -0.61536529955583 -0.489002363175942 -0.703546673875038 -0.677037019036448 -0.797390959512023 -0.939151939566092 -0.93544778303578 -0.917975579109357 -0.966125549370166 -0.980484404451926 -0.97083576124503 -0.964414245223008 -0.97595729842417 -0.974588381013301 -0.968702359002152 -0.963784608616405 -0.968755150546995 -0.967402906623698 -0.961503118065611 -0.947200135373456 -0.961823226221825 -0.967425307260985 -0.892938714195671 -0.902472793002367 -0.946781722377302 -0.903675550418163 -0.97029248489104 0.258342296452453 0.894112257995063 0.889259604575183 0.908959465214368 0.993682591705507 0.930289750045753 0.423422494752386 0.216590949038476 0.526125585321422 0.654020601188216 0.394074816527584 0.208220585370721 0.666967642521372 0.570782447563983 -0.586054283373062 0.0282013486929319 0.751662169130663 -0.3536193290504 -0.810348415821304 -0.19687894986139 0.140192036698742 -0.886313027189971 -0.893996207593551 0.00890226728761873 -0.404442019644867 -0.91541859252985 -0.786817082646179 -0.57306497927964 -0.633882824983063 -0.500315147392036 -0.322772709890537 -0.308660888851398 -0.456723336900799 -0.362107001221504 -0.390596157514596 -0.279308585254505 -0.428397612851911 -0.2358969895335 -0.55411047457827 -0.629262270683045 -0.260738141342184 -0.333069388486293 -0.208690577518803 0.111100270205499 0.0152886388092821 0.0463826857799781 0.02400599706838 0.265021435974016 0.409297454234151 0.714838824313653 0.502534609665352 0.402548612995241 0.182910984346545 -0.227442016745131 -0.433167442457285 -0.543457820430331 -0.697920194194861 -0.764006889523645 -0.671607344076235 -0.866045057532957 -0.87401108848141 -0.84654703073957 -0.87083087126535 -0.924550506382869 -0.912601498138386 -0.932081401482603 -0.950328107104453 -0.96981379435768 -0.965659873955515 -0.926267513333532 -0.850989727560474 -0.927062652558626 -0.94052543717198 -0.593763897171195 -0.476826148465139 -0.927412767768501 -0.857054020138514 0.421675662348077 -0.393738350496636 -0.913714449471655 -0.51023574167502 0.743299932852484 -0.0807339214802678 0.0664933874779337 0.634943928993171 0.608650946947824 0.327923571068517 0.459973406418958 0.607781805771674 0.809170986195645 0.963670602425629 0.89512853713292 0.939705897718682 0.969799265542601 0.98209815409582 0.827612333298063 0.982265944213013 0.987447638707371 0.944296478047284 0.429194085430729 0.990808865929578 0.972749824571287 -0.380598332508418 -0.727392163116116 0.962562700147171 0.476177729864199 -0.908147253772161 -0.884434675864906 -0.544555279723301 -0.738184340733139 -0.807001647180961 -0.789954599162689 -0.797716264831577 -0.866112387929399 -0.89550132603546 -0.692517400327417 -0.651616429193406 -0.852927259552164 -0.830594578166987 -0.788957477853893 -0.873033836568015 -0.604115050792078 0.317168355083027 -0.33438213597619 -0.212694333738944 -0.448902120850413 -0.623092591806562 -0.341800677638948 -0.673476367737017 -0.844105873052915 -0.756984741727669 -0.671896270421744 -0.86083611141313 -0.887753365745936 -0.687380732324282 -0.83791463031872 -0.87382545527311 -0.297336055960847 -0.0459115882205751 0.0171593054723437 0.819383106133157 0.849719221700609 0.412112689099959 0.0187597298771905 -0.593498633595907 0.675882049516667 0.838873799942005 0.707790858573572 0.777516297404495 -0.841469895586165 -0.93441518013576 0.617814030539852 0.55055421688739 0.520479471496266 0.588987391085024 0.483806220676061 0.383938304315648 0.563103117722039 0.581549740193016 0.332483633228174 0.339940325222108 0.47167921052013 0.717649131641832 0.519416170313071 0.0826274434917151
-0.355506334770299 0.0668959072603876 -0.23751401097561 0.126518157092219 -0.244548817701457 0.00694986936108132 -0.181144698905485 -0.411143000788862 -0.485084635372404 -0.330357517589639 0.0598304417251256 -0.288791314789483 -0.512693158221759 0 -0.528279381480299 0.217632523703341 0.00147667097674009 -0.11707532124564 0.0335933441307199 0.198081624101238 -0.228265467635048 -0.445065829067457 -0.323208407863904 -0.00876963953529456 -0.263009082101387 -0.565321411603617 -0.405044914340074 -0.0947383174927409 -0.448560112519472 -0.346267177098526 -0.407388745940912 -0.296234251403378 -0.214929694871065 0.435057212002109 0.280755586376372 0.234702903472414 0.173138988441468 0.402824541247004 0.62411227209838 0.0795978035914107 -0.174541864056955 0.596175163457603 0.0499498569486512 -0.530538208681114 0.107640094007742 0.549881216889103 0.375784117951314 0.170480667567109 0.471312047828184 -0.0234822760548282 -0.318663648087537 -0.205396042931394 0.256875417263793 -0.455466904203597 0.0152412966992761 -0.542496360139628 -0.476779710056061 -0.541293567771007 -0.523460046912726 -0.56264958417732 -0.542949941819495 -0.547153747369181 -0.579266574461868 -0.516394824192251 -0.562727360819065 -0.434442524337215 -0.0432181959141644 0.103363477228654 0.697304961712615 0.822190969518545 0.754834407531088 0.677605281804374 0.85810860297636 0.892166035407945 0.453635997625789 0.0875871179602163 0.464926412792161 0.411370098309179 -0.327537822964496 -0.539490906148917 -0.544088506222536 -0.391090898518139 -0.661282540267439 -0.603730690084393 -0.747888192025735 -0.931276727851812 -0.92525423485597 -0.889181152768154 -0.953513987060574 -0.977298639642737 -0.961380335341512 -0.953323011503665 -0.970370883502627 -0.968692184447928 -0.962771262770711 -0.966673443177665 -0.96944040781739 -0.967602859387025 -0.96490892960372 -0.950009200081315 -0.959349054496767 -0.965290811968817 -0.903838255564692 -0.90468858896588 -0.940961402404294 -0.885451840246871 -0.966191042884986 0.31386207096406 0.920478792260648 0.922152773961873 0.915760748763364 0.993914759939405 0.944381050708345 0.501600583251214 0.467552273999102 0.685074030979319 0.800607244126705 0.684653597968574 0.455138690764031 0.813746963695507 0.73851173546069 -0.332025716817047 0.340465525693588 0.832583301917459 0.0371684672245819 -0.686471384195905 0.130886083351256 0.474382800081654 -0.827362416563066 -0.856439328939858 0.215171591324832 -0.171955249688198 -0.901422753179547 -0.74441487832301 -0.505537641488815 -0.598002588261886 -0.480062609537694 -0.280988557926559 -0.265136900325498 -0.39954082663265 -0.328668565948296 -0.396237527674823 -0.301604447940474 -0.439451864419677 -0.265356437733986 -0.570357185136094 -0.659430549600493 -0.286165552295052 -0.369529548911818 -0.24966280636655 0.113552226710414 0.0180260780196992 0.0341706836820416 0.0432702762574686 0.312147925738652 0.448603727267093 0.731804140760346 0.513601625540415 0.382452071482246 0.153071268260866 -0.309740413183474 -0.479072794504263 -0.594616042185086 -0.726877824396066 -0.790199892755079 -0.716544445427122 -0.886672392913758 -0.891910683640135 -0.870758067731592 -0.891687018866593 -0.932935470570711 -0.918648934729316 -0.938350156388739 -0.954325749494412 -0.970199785532305 -0.965902155223529 -0.928237652340504 -0.866296141918788 -0.929130864743673 -0.939562969943103 -0.674860309038631 -0.620935662831463 -0.933971048890018 -0.877280986298543 0.17559610164524 -0.602556975199561 -0.925779107645596 -0.652012167043905 0.613646243630614 -0.295655232978275 -0.144335757709712 0.567831150034911 0.512632627970298 0.226513034592804 0.414143371897333 0.591242681814615 0.817130541652331 0.974107433672016 0.898966466133209 0.940243590942291 0.972502208322911 0.984861336664031 0.774205968150629 0.982545215753694 0.989300739192529 0.903827603866191 -0.0910800866192139 0.987889936679509 0.969159834518728 -0.615143391158877 -0.806179658691579 0.919065880555141 -0.0955236682732984 -0.90984238040326 -0.887228431834299 -0.730578634046834 -0.820448893563641 -0.832157169046666 -0.826328664834463 -0.81406178026099 -0.877035978774252 -0.906932056826986 -0.729115096175588 -0.693572128574414 -0.86662261043419 -0.845829990966955 -0.809510677937768 -0.886629261617105 -0.656612255026081 0.25833277045623 -0.367771871394531 -0.295770958373606 -0.54121097809102 -0.699360866503973 -0.435187105617631 -0.692948375294279 -0.85204434292956 -0.8116731676022 -0.73772709850346 -0.875519597477109 -0.896236777633116 -0.7358965752381 -0.839984425493475 -0.869762380716352 -0.452362134381582 -0.373229332980657 -0.576596730510395 0.277690223562613 0.638902896759899 0.094754230546649 -0.184216666830785 0.0812890778521044 0.870963193997973 0.883165520261064 0.815515678618954 0.924767218839771 -0.281858442743581 -0.925064808483383 0.320743226879284 0.355276426890591 0.337456638661455 0.514268206694325 0.358792371323586 0.276560942136945 0.571534425185682 0.556287329696021 0.26353930660372 0.368780490501883 0.560627325666221 0.702668109600075 0.555284104608162 0.0576378789627895
-0.3627847093786 0.149348449286196 -0.228643099897532 0.180504600291374 -0.181980249056507 0.104544852867536 -0.0189662302854279 -0.206234524076162 -0.0618580683338618 -0.214275753023643 -0.12249226496881 0.0953693545717787 0.0816364713487159 -0.528279381480299 0 -0.290707307130487 -0.407266947740801 -0.151476913572366 0.0515254624240992 0.167429341579187 -0.30196187044243 -0.253612158179519 -0.259254674531552 -0.104875131288617 -0.172027502530142 -0.486122903335774 -0.411970972675073 -0.140828115298768 -0.418399844970727 -0.20283000630148 -0.368858930201534 -0.206531205381142 -0.220262219957435 0.312790718974461 -0.0676106165140191 -0.121209954390724 -0.0599500911538254 0.169833387142851 0.324932974584866 -0.382020732762986 -0.460462244957096 0.343784247704157 -0.496504340604192 -0.7686442237253 -0.214876262582388 0.300082436627616 -0.0509186458328318 -0.130277369016839 0.187721344010388 -0.332427582959024 -0.519961878714911 -0.426598885490684 -0.225446955903547 -0.588514924731485 -0.211985338456771 -0.446317769441081 -0.336002482294405 -0.393819104905022 -0.33212251012154 -0.113106602512211 -0.249759176305863 -0.200826802535419 -0.214963513786435 -0.117629737854972 -0.192538166364866 0.00396485860922287 0.278723772586309 0.285693749164421 0.676454440315539 0.783799479349983 0.690636469353093 0.566717302234403 0.801174016332981 0.867389743424169 0.390157325531788 -0.131884293116271 0.28010961388655 0.321491362133492 -0.347076050076404 -0.620814983486308 -0.623676543417441 -0.42408200788752 -0.716902719027524 -0.656118857204222 -0.712322043613334 -0.934656890939968 -0.93958017572147 -0.91834660127911 -0.959042120636997 -0.978552987424371 -0.970081244102692 -0.966670144687007 -0.977095901256762 -0.975716686909492 -0.974474157812685 -0.977206272184549 -0.977365642547267 -0.97638402051982 -0.97415563478189 -0.964718339660029 -0.970058758084673 -0.975169772852888 -0.926031901305137 -0.925301925924603 -0.95114097205341 -0.910656300607374 -0.966211464169721 0.230335623567808 0.920263358256339 0.927301735031467 0.904212623864224 0.992903828213772 0.943489530820076 0.111818182378248 -0.00590340120250318 0.51327664016186 0.664448554767993 0.0584243768891583 -0.152013882025733 0.630519572043896 0.291419060111614 -0.754069478743013 -0.371844965093886 0.556583227767077 -0.648004297732073 -0.851932739179016 -0.525457464048869 -0.338044382317144 -0.919823552392733 -0.912238416179003 -0.187820359787214 -0.673263753141462 -0.926102208004155 -0.801942262806897 -0.610964179180845 -0.720301503544945 -0.577499064327184 -0.418127787644823 -0.41170961695412 -0.528233634888047 -0.462190920957048 -0.4831334703996 -0.410039632190038 -0.518809737522232 -0.302046438104409 -0.63593573192446 -0.692122851999603 -0.367964436448584 -0.362611919488026 -0.287544566680231 0.0123303858063083 -0.04286548920191 0.0125805759315584 -0.0555385298152984 0.171086758180824 0.365390373180412 0.697189594879776 0.489369369497796 0.407889917475761 0.193103480708136 -0.173876598351356 -0.450375697075737 -0.610539275058921 -0.746114794651543 -0.817519068382505 -0.77032060985707 -0.913700517869232 -0.916062641202276 -0.900135954124583 -0.915538625100766 -0.942706556336128 -0.928746940964674 -0.947702993773558 -0.961590394434664 -0.97381309507296 -0.971821797012796 -0.94185424278802 -0.891478516756474 -0.946860274671198 -0.954155466382443 -0.797070366038284 -0.751112985230571 -0.953817979410135 -0.919965028669961 -0.144014099294104 -0.73792185246391 -0.94804292037634 -0.798853179241076 0.460432407003519 -0.516740022134888 -0.436716855951148 0.454281060763242 0.391900186887861 0.0576177442718344 0.309542352130423 0.560629720555106 0.787948856879229 0.971643867484337 0.87735701002482 0.929713868064319 0.967540076417623 0.983335532423632 0.709473388999701 0.981784794204173 0.98670561160851 0.83765835513561 -0.319535905589587 0.983451928475442 0.954326687021695 -0.675665882485125 -0.804659253190179 0.808993157838516 -0.395860409215987 -0.878785888801551 -0.856232552402058 -0.778642887992831 -0.828139293581839 -0.755153938462098 -0.795198499063715 -0.807181178339935 -0.838382313602903 -0.878011033827512 -0.72956225839473 -0.707154965199982 -0.836055711472817 -0.839023376343855 -0.816383184593212 -0.879230106563856 -0.540633392077339 0.350059631165388 -0.296023862038926 -0.130579445835544 -0.38173909082907 -0.556840360397326 -0.326061545923549 -0.495642418537605 -0.73992889419435 -0.728271405577961 -0.635120579149059 -0.740520390070885 -0.821742429651298 -0.678280482819559 -0.727137861107707 -0.754769719327052 -0.404189462758825 -0.462449796584321 -0.60135744311386 0.0537520591124005 0.385652859516792 0.0800688465089145 -0.0987353679516715 0.182823661948053 0.878874495616959 0.896256497118893 0.824264623277751 0.9166727582615 0.218550370468754 -0.906900101041941 0.539408452678521 0.530605855560004 0.618941094625916 0.688025174540641 0.549632672066504 0.511142471243441 0.713052830821948 0.719019512194746 0.558151517999175 0.610694112546341 0.688495259344534 0.850474126108956 0.625023510635306 0.283052310331529
-0.435300155147939 0.0904352912456117 -0.36195461094498 0.00293082299897269 -0.38672868334999 -0.0189779232973161 -0.234662323522029 -0.489355893199531 -0.324279710108691 -0.0910711101430347 -0.306557464999349 -0.563083288661879 0.160836781444047 0.217632523703341 -0.290707307130487 0 -0.478007711360035 -0.151580910984474 -0.0989988233618956 0.167363565851751 -0.209929586293921 -0.130810590717783 0.00330590970833321 0.0152575651869885 -0.134262851818075 -0.361220931606746 -0.235416838130025 -0.0299405504847196 -0.278985878038923 -0.181724957633092 -0.309662985764068 -0.15560980481254 -0.113559526611182 0.336616341315361 0.223338894516766 0.127235111977649 0.152810286465322 0.351777131233758 0.462680923603821 -0.146678746825763 -0.242539485387808 0.503930138501962 -0.379743673667464 -0.73166330310631 0.119652995965174 0.426894765772405 0.0519048577651868 -0.0430041188007944 0.279804222934372 -0.278535674466691 -0.542357254116951 -0.343796588736917 -0.268091791885592 -0.481623523121612 -0.219942857778477 -0.424186635430391 -0.387959013741027 -0.484982965910662 -0.334101516757175 -0.153339970958734 -0.400821366345329 -0.309860626623398 -0.37789825927118 -0.286782072529357 -0.346111953658252 -0.0371875177730163 0.253379800783407 0.25453828789877 0.599948474725815 0.760255239066598 0.669809547560285 0.576642050524659 0.799054758807604 0.869215300537714 0.425167542301737 -0.162989854522287 0.2809997629705 0.338210002959378 -0.283135554533284 -0.617697125236598 -0.585975037030748 -0.321892000047761 -0.699443499256569 -0.645495408543277 -0.70954290232956 -0.940619865113677 -0.945905712485757 -0.9223909054802 -0.965414898048949 -0.98293273832389 -0.973482141687223 -0.971647514673047 -0.978790629643177 -0.977292302838449 -0.975070601765212 -0.974852806369337 -0.976143897953774 -0.974923379737699 -0.969974171369773 -0.954557634925111 -0.963749488919492 -0.972966089766434 -0.907153332983035 -0.907866981227407 -0.947018543952082 -0.9066303059855 -0.969808431217927 0.250245837951743 0.904133916041563 0.902894560304445 0.904295860966492 0.993590793472175 0.940146588395027 0.291464938110405 0.0481180807949131 0.485767151243893 0.633070287381211 0.130754160961761 -0.0495799050441812 0.62113567376202 0.319656740890578 -0.74737244193074 -0.325182232360544 0.569522625204248 -0.640310130599814 -0.850538289310296 -0.515285292844935 -0.342608000721425 -0.919544577927768 -0.911014470609972 -0.167549854453552 -0.655304869029771 -0.923196481167537 -0.776129292937198 -0.609246350514257 -0.733716936380383 -0.597703980963235 -0.442633625463901 -0.428910601376259 -0.541892478627309 -0.51201561623171 -0.514006410828949 -0.435133075921705 -0.553815643669309 -0.332236701305134 -0.657217567482536 -0.728751931225355 -0.440534196999365 -0.41892907378217 -0.375094268819477 -0.070563886682735 -0.160221750829476 -0.0801615543543637 -0.14226697593423 0.0678596825292459 0.250826680563301 0.63527685839245 0.363111259790753 0.371483617452717 0.198248665643627 -0.153933880096721 -0.385677954272636 -0.648502869360252 -0.781143612087486 -0.842674005034065 -0.784140689452261 -0.916707642915456 -0.915106979435466 -0.898255455526721 -0.915727789817391 -0.9442283378621 -0.927315781609897 -0.945388002397981 -0.962040750335473 -0.974373184779202 -0.970760950322874 -0.937740735805443 -0.878047492148861 -0.942167937621406 -0.94860283670957 -0.637548222107775 -0.618129679844174 -0.943958342618785 -0.874368226673902 0.479053991608017 -0.521263724564732 -0.930603840235322 -0.440540034555544 0.794693521006768 -0.0361813677440133 0.162365442400677 0.731011813766857 0.699717876006006 0.399716776255338 0.548939777403615 0.676172078788935 0.861159183814129 0.973530387218608 0.959876532850608 0.955934219603373 0.975586883032542 0.991425894689267 0.952745250583537 0.987042795833882 0.993707426277925 0.983201726802378 0.905440436830703 0.993524397541731 0.984615527240662 0.644108929963616 -0.189043972458961 0.956024240995009 0.792153339328897 -0.671206040906303 -0.781171661797383 -0.61943189697604 -0.662064451965112 -0.649150123307207 -0.765319379415761 -0.794799739075177 -0.833156584235598 -0.888540330925493 -0.732795476062827 -0.670763932143306 -0.833695701483115 -0.847833705809108 -0.822107977716158 -0.889626233323422 -0.568131463839862 0.414530138699548 -0.270376859810704 -0.0831569535769303 -0.339466406450282 -0.510116156307862 -0.311250867812773 -0.520270571507771 -0.759536295059591 -0.716406155819664 -0.629790193557529 -0.732209969154803 -0.79351818721524 -0.651447888172097 -0.758715696695488 -0.636451156250548 -0.160584942402029 -0.480349424598075 -0.679379319405879 0.328829032674505 0.5707860965541 0.104822986924621 0.0796641142448744 -0.375220850580229 0.544899306941635 0.665448028322896 0.606627724377165 0.708505680175381 -0.93564878434569 -0.951225528932499 0.500807852370708 0.556139432239857 0.611805333777078 0.63535268233449 0.507023727383056 0.498650806675368 0.663797534581339 0.6506164496261 0.477564756367123 0.515584486904974 0.605272451752765 0.81972204954823 0.643004130660277 0.258939407303151
-0.455073438390331 -0.0146698968384696 -0.360260194051059 -0.0137467273460198 -0.452411566427459 -0.166926324265726 -0.342994270996719 -0.596084106934269 -0.630164823083625 -0.352797054527922 -0.202162759125417 -0.746983190151641 -0.528143806607156 0.00147667097674009 -0.407266947740801 -0.478007711360035 0 -0.511159158174338 -0.288103675231356 0.0324189445472363 -0.35912510712234 -0.390477540290048 -0.261367125431681 0.0382171553809427 -0.273190119900105 -0.482591719090498 -0.31389378256462 -0.033647087728168 -0.374616259501233 -0.375286192379438 -0.356738237701869 -0.277997352890132 -0.161766969797477 0.507480128155156 0.549096779598154 0.4544538576414 0.376220667614657 0.555070362872151 0.750927872050648 0.366992238022302 0.0666448084688912 0.724372681542436 0.212093897201707 -0.549331225893438 0.0960750952528113 0.67263812917263 0.374214582371236 -0.0560202878552734 0.456380806715291 -0.470173362667431 -0.813216913803857 -0.535032652066282 -0.602249939966332 -0.646983862738471 -0.440228495250418 -0.726683933685902 -0.724775330007683 -0.78330861706251 -0.726803612243621 -0.73354191491645 -0.73800656602795 -0.766405138531264 -0.777062738027756 -0.695607692238239 -0.776601110382526 -0.56300214362932 -0.36856142856357 -0.313392818935914 0.405170095094914 0.703596526906686 0.549132148963173 0.512892479374707 0.804648640710737 0.846876504785866 0.114656085656669 -0.177889915825521 0.284381077257619 0.149467510356058 -0.499283776971198 -0.759215158773864 -0.736935728434056 -0.46522079061494 -0.820576950404759 -0.768650674420972 -0.858626130860396 -0.923271209499787 -0.940831872469037 -0.923953016455563 -0.97021456189575 -0.979104580655384 -0.956400503859478 -0.951450173742318 -0.962299885496232 -0.959986266515312 -0.954397138549358 -0.950815762837961 -0.957322117152244 -0.956447122221279 -0.94730004605912 -0.91272419029682 -0.934056753462098 -0.94821690726952 -0.852803745791045 -0.847124162209473 -0.911504339984056 -0.82011409637042 -0.966046778036351 0.408755791597226 0.910163797679259 0.899737813244586 0.913344567110135 0.994258930678629 0.949355597431441 0.667215929109865 0.633057495416779 0.729842266875586 0.816753728675073 0.810413619748628 0.681538260442785 0.871423854366922 0.869571492208734 0.0696031722789652 0.678311551305354 0.903852278630316 0.457955034550009 -0.634781173636413 0.389807534520239 0.712128673650458 -0.827730912415975 -0.868271185432828 0.353833980831437 -0.0297257091490469 -0.906140024618282 -0.774381419092733 -0.582991562221328 -0.692655799703762 -0.654871609250961 -0.500735747191391 -0.456027490626056 -0.54078117505575 -0.491905894123808 -0.512982280596639 -0.413261342511732 -0.531529441123842 -0.384768855411969 -0.657027068974725 -0.737836612370487 -0.462122996996219 -0.49608241495392 -0.465790239882522 -0.144409561680394 -0.283772481201712 -0.246854250138074 -0.234270104131336 -0.00674802502609808 0.104343899591217 0.507161667444288 0.0212978267756539 0.139413598437138 -0.0126073861433364 -0.390415014955305 -0.460877523895859 -0.724123195089115 -0.828885856204474 -0.867225721757551 -0.79576800794097 -0.921074394294596 -0.909515609918485 -0.910507197774274 -0.911879825434018 -0.938495171023618 -0.922955173901452 -0.925073312374851 -0.951463715233877 -0.973267617942029 -0.968249829190168 -0.900313267969365 -0.789461677975299 -0.914913605406681 -0.924142641590459 -0.0864111215075907 -0.300188867635553 -0.895892810162774 -0.651290796191758 0.743158127353071 -0.108702411527534 -0.851067191978528 0.379798282161087 0.876919636637856 0.499313482619102 0.608580907831757 0.835399492433711 0.816876893646005 0.617482493874377 0.695725079936178 0.755081892332498 0.912824298369937 0.980863191245742 0.975191632687547 0.967041598565015 0.980899521314101 0.992545662220883 0.971252986113578 0.988119289524368 0.99444733846887 0.988363064953974 0.946753031908041 0.993668472283392 0.987125859227668 0.855309172047187 0.234722770131242 0.960017572451118 0.890062041839619 -0.370792281138234 -0.746256795567 -0.310853269103942 -0.316237648039337 -0.667215727863723 -0.790478471896492 -0.789393217582302 -0.816505543823013 -0.890462361987076 -0.749640909243503 -0.650647113796221 -0.823246624215375 -0.852485585353742 -0.826073301336552 -0.879145395864606 -0.662134218718232 0.359583556063625 -0.308741163460412 -0.212533331501453 -0.464850840517813 -0.653999574345224 -0.45810242619562 -0.709756378062699 -0.84202962489964 -0.816693090542069 -0.765460555451704 -0.849505013060278 -0.836929210353592 -0.742615536286338 -0.850709911717793 -0.732050914266414 -0.10219393183413 -0.554347530513466 -0.698468840485206 0.396921979815573 0.681573078452087 0.0469538925727105 0.198246377113654 0.421092324302311 0.675195658940015 0.671601979660792 0.700705903128075 0.904718726830509 -0.957668742589816 -0.966862096480021 -0.0478375387951057 0.248152417903953 0.293922638579397 0.429063032031401 0.278425682097857 0.261224754895099 0.522734802479426 0.463364983502424 0.171393276938329 0.340841010353069 0.467637600498803 0.572175256489184 0.539859197175349 0.0278321200587249
-0.396962126475656 0.0329320872494192 -0.239579509871887 0.130304142710792 -0.249594862506431 -0.0540891706423318 -0.114724126669784 -0.304763748914264 -0.398935942256533 -0.382582911676436 -0.0105716214788182 -0.262126161673364 -0.364331285843492 -0.11707532124564 -0.151476913572366 -0.151580910984474 -0.511159158174338 0 -0.231511222631793 0.0856953613526163 -0.0599335365133245 -0.471408012868014 -0.521656607838287 -0.0678566435267008 -0.12178253378151 -0.515290525062997 -0.447282445400955 -0.0626670367091739 -0.446037104315905 -0.254577964027698 -0.396716271104445 -0.311229618947272 -0.233219156147569 0.479107158158485 0.263067673359348 0.211603824594306 0.166442486348812 0.41162516791384 0.681827464922542 -0.0182654344990483 -0.35138985404554 0.59480133579316 -0.229212343410894 -0.821555503331067 -0.597488317392056 0.396927006935546 -0.234209677145752 -0.508499578593751 -0.226742827734898 -0.664041043745701 -0.830035427362108 -0.590841556133938 -0.689063539174744 -0.707038202640224 -0.509587757363375 -0.764317418851357 -0.754114168069529 -0.788488586643378 -0.742362822714191 -0.753588030351608 -0.702541271600207 -0.697874227062364 -0.726786514204291 -0.653635777805178 -0.716573514199027 -0.54191645801631 -0.358286439213629 -0.331376570512624 0.387635230154705 0.673183993852769 0.488766148973461 0.419484475408244 0.755696752467239 0.802610060672966 0.00987897205221219 -0.253130383646492 0.134807247061283 0.00550404265459918 -0.571150330202191 -0.798873173581587 -0.78968597485228 -0.540214616671396 -0.836826897379509 -0.798284700222855 -0.868681811534043 -0.921339633115936 -0.944007375319635 -0.933051041609384 -0.968788813671221 -0.977017649305176 -0.961170688104849 -0.958222082656852 -0.961795463235781 -0.960374422764732 -0.959176023858026 -0.956374116307813 -0.959508354417963 -0.961602635802048 -0.959905256518877 -0.923155419515982 -0.932789187099502 -0.950625361840601 -0.879051555657576 -0.858390408395465 -0.907657737777979 -0.816769480977229 -0.96147788686849 0.421578628619958 0.939462537758959 0.941710549878014 0.923125760406163 0.994054794313806 0.961257179689185 0.620183675011579 0.630112206007124 0.745172161963607 0.844772289688126 0.801448267379477 0.608454139234349 0.881676219143032 0.874055811550332 -0.194316374614531 0.499122742176976 0.857039093340304 0.292141985145375 -0.703313581490876 0.154998330983825 0.574020025802055 -0.850470399593412 -0.88135736594492 0.230372369633547 -0.188013325714603 -0.91246478761687 -0.805925767541025 -0.637706341935365 -0.740249358020408 -0.701206659239721 -0.565007786018668 -0.526625678630208 -0.596186122766981 -0.541777356702388 -0.559855370884012 -0.46507814898353 -0.563301698693552 -0.407506742861169 -0.676965813233242 -0.772408214654237 -0.498298155831935 -0.512631003174208 -0.500079748656844 -0.174809683616568 -0.286922403226273 -0.257041773904893 -0.258163971199133 -0.0241116822986323 0.104450699781772 0.497693751125861 0.0449938636951899 0.134269403731479 -0.0511666590175945 -0.428706385767665 -0.539882055374319 -0.762207503985997 -0.856558061921335 -0.886060516001247 -0.804414633335924 -0.933470413883203 -0.928564862296914 -0.928422123358442 -0.926908238969281 -0.953623257290441 -0.939936320330769 -0.938372555579341 -0.957818412069541 -0.977482210922442 -0.974883168894893 -0.930713210529237 -0.840443809680818 -0.928582378613886 -0.937143303270164 -0.429604508018298 -0.504578278399579 -0.915470378697357 -0.794673535960834 0.562853526021924 -0.402661726661007 -0.885767662153556 -0.111955576586883 0.796534162662471 0.20328787470122 0.366535313481555 0.785669219156923 0.745897439906533 0.504047861810067 0.637011335005332 0.730915677481112 0.907393472705575 0.981555375028795 0.966367331950876 0.960252226749186 0.978181566244303 0.988279665097823 0.951665590508418 0.983525800304789 0.992199689448258 0.97344294585995 0.85573238313246 0.987173842109725 0.977795649297397 0.678649020696683 -0.146973202267272 0.916387553412089 0.748295014868582 -0.574703450213173 -0.719046572133746 -0.597656088493295 -0.553986509191686 -0.723046254680403 -0.820541047301607 -0.789707046144005 -0.811120785333686 -0.87863908772672 -0.774621120372372 -0.70015352504884 -0.818006729227609 -0.861148965030022 -0.840633507344712 -0.888713921428675 -0.635132793715926 0.334265359771373 -0.300568525282075 -0.18564526006263 -0.436524742514757 -0.621059356963997 -0.479609367347429 -0.630838872351556 -0.7816312782866 -0.825434080680176 -0.828009422283441 -0.82648100759789 -0.794802444096452 -0.757514927390836 -0.826136761690763 -0.61500403591479 -0.24223364990464 -0.600845540758506 -0.748232736015196 0.0710008552102332 0.406767592390124 0.0846141375187115 0.201364157628287 0.730959129127461 0.844943672063744 0.760142690268973 0.823490237489522 0.975721044476276 -0.802860052030502 -0.954539202271558 -0.132954444096257 0.174876958052394 0.0879848836792332 0.319323601623918 0.224905433135946 0.239222062039871 0.530984585930357 0.503413006427705 0.211814956883225 0.412220401135345 0.565669033064193 0.664444194157925 0.637978213385177 0.106138446393045
-0.419827008367389 0.188693334286354 -0.305244261204718 0.258060110460151 -0.210230536662679 0.0839528018734058 0.0481477619686598 -0.153922079573628 -0.152768891430991 -0.217773847846821 0.0205519214237495 -0.0915377384000284 -0.0750433937337734 0.0335933441307199 0.0515254624240992 -0.0989988233618956 -0.288103675231356 -0.231511222631793 0 -0.56158280271609 -0.0531756071315789 0.0427983601473345 -0.305083977088184 -0.234264823243344 -0.00503967681728414 -0.315918501959201 -0.322401978665701 -0.14621035905569 -0.200369511290546 -0.122504232723334 -0.334124712280975 -0.205114019144109 -0.232354695211947 0.23222571289001 -0.142954471304996 -0.229718876425956 -0.126004287645518 0.0632416610859256 0.191348657139503 -0.564913843722711 -0.625769839861833 0.0247350170598075 -0.767230407735003 -0.904071659741268 -0.779852874357266 -0.388204456944673 -0.721837956666279 -0.698143287185926 -0.571086411526277 -0.724247003117728 -0.796882278220348 -0.439160262206954 -0.589665674832926 -0.567601561925065 -0.416426003763447 -0.440143175411212 -0.464483440595525 -0.545091019558333 -0.41118703963915 -0.270599990798947 -0.472188617488823 -0.423168362972489 -0.361799127640327 -0.307259428874785 -0.48933548452731 -0.153949814176418 -0.00199253436903033 -0.0621696021233843 0.411477347991515 0.659069381778741 0.430310809669832 0.279940034439887 0.626271005839166 0.73746848494311 0.00540816682825015 -0.358036403939801 -0.0213803595449854 0.00788595058292713 -0.360720252822478 -0.729688739186256 -0.697658440785176 -0.352542452768458 -0.759087500400123 -0.736155508127929 -0.772739213870922 -0.923915085475221 -0.953829495272421 -0.936366778803303 -0.963687157610515 -0.973461600076751 -0.968499328506471 -0.961687011658291 -0.967070372524102 -0.96612540932307 -0.965704809234226 -0.960817275813561 -0.962712855561563 -0.965520498462681 -0.965271701346607 -0.933872032492645 -0.938439848137201 -0.955339576642306 -0.900669617917721 -0.874607148608099 -0.917691835242845 -0.85700243152246 -0.966090319625878 0.350715440672484 0.944382896542788 0.947186897783831 0.928734481446463 0.994813024965738 0.955182624781038 0.197068981780252 0.111373089346175 0.572845725738312 0.699533316854151 0.191143226760893 -0.10746950577378 0.634335496921297 0.364956213313224 -0.759205375028466 -0.433650480798501 0.545575072451703 -0.659694186923001 -0.852030237590322 -0.623640843564293 -0.422007029368297 -0.932990564480513 -0.924733475384601 -0.22161508465181 -0.664044354886511 -0.931397306970039 -0.808259891852235 -0.74112735785352 -0.835926149519119 -0.702596694614773 -0.624054241847462 -0.612215762992604 -0.682426998531009 -0.626612238374026 -0.613977091734058 -0.536663268588228 -0.612483008038279 -0.403094396289674 -0.673612666244798 -0.699206021349397 -0.467911595990114 -0.42958563911543 -0.426848093316953 -0.196931190312396 -0.272606155679356 -0.205124604828902 -0.287228824041225 -0.105628687400886 0.0633431323582524 0.423415746965867 0.110986934295474 0.199396371382723 0.0510581611416726 -0.202358324764021 -0.358463830475049 -0.618491948471247 -0.755541830757857 -0.828316173959679 -0.813340373979642 -0.906699921778358 -0.909018353373721 -0.887319334234428 -0.896012416569762 -0.942785172791975 -0.923065667328331 -0.945651818465601 -0.959092505392165 -0.973422197927611 -0.970580811572843 -0.937659982250807 -0.875085668196131 -0.947529818457884 -0.949630443307744 -0.611629309112354 -0.647548164307044 -0.938449312602306 -0.861928178237361 0.49735469677452 -0.550264410922699 -0.908682916824995 -0.327631266209735 0.789390637282466 0.0496325666543903 0.211747023634076 0.783473825196655 0.736062081671764 0.447011215615001 0.616304858979766 0.735910002295188 0.904307470222783 0.977721749717241 0.969747162329846 0.961390661946217 0.975398876069158 0.987560644518038 0.965324857999949 0.98503081207196 0.991928284992336 0.979959915014809 0.916580091927232 0.988849640281419 0.981951256330854 0.839230201996395 0.17049806381149 0.91826331014436 0.823098401586 0.00893956306095538 -0.495003947255845 -0.561595548856341 -0.461564316606912 -0.403924289382276 -0.660215973799131 -0.747984958192807 -0.693007662828523 -0.777383970242956 -0.673075238773788 -0.603938695663851 -0.689179177844257 -0.767352209742112 -0.765249981469924 -0.822253871896175 -0.434863017962979 0.479143075418279 -0.251688936733153 0.0234640654298428 -0.226257205359304 -0.411556941010371 -0.248728556531117 -0.425274488695015 -0.655352557384564 -0.578725160017276 -0.498925359316851 -0.570265387376566 -0.635929959189075 -0.623761583319187 -0.640803945210616 -0.379669049535465 -0.0846575130779315 -0.490318939443518 -0.661431700156743 -0.0290999114085469 0.02688845881713 0.149138576749669 0.440205660868933 0.807977881758005 0.847817376114554 0.757031910290068 0.848797261709506 0.969369509806624 -0.882674821735501 -0.960580915188342 0.0920362284275171 0.412790548041779 0.396684078846044 0.489244536601357 0.424295308871956 0.475139447475771 0.739166196738876 0.750307935377857 0.557811142133665 0.669428933309059 0.698922344081521 0.882812102682276 0.767858828142391 0.372915252288953
-0.436912027889118 0.119470503698374 -0.307329430812962 0.142209122762344 -0.300073731012617 0.0240130173358992 -0.0746362094063086 -0.285780948248757 -0.264215101824367 -0.133502128517172 0.0227451797880932 -0.261296900588951 -0.0348041390914215 0.198081624101238 0.167429341579187 0.167363565851751 0.0324189445472363 0.0856953613526163 -0.56158280271609 0 -0.439386834204511 0.0361109060513299 0.00742385363340412 -0.234343455197746 -0.297127642392149 -0.585212764823656 -0.380875814520526 -0.159718422305318 -0.341565412941037 -0.335674316314168 -0.426199567406607 -0.272738331139103 -0.176438132920975 0.360021737927899 0.34962690994554 0.226532773456435 0.289871360031127 0.459690847249173 0.546336755740897 -0.0448514755343585 -0.194969414114426 0.479058803077853 -0.568634170330567 -0.867501611636585 -0.751431445339629 -0.348829437957642 -0.70436738877776 -0.749233915051325 -0.742865807613825 -0.77277210161644 -0.754605352632365 -0.248492216751218 -0.668480537128376 -0.495163440308119 -0.415377172318769 -0.495899232498426 -0.622810021693955 -0.680647085620323 -0.532664746484039 -0.410295667185966 -0.619540782058545 -0.51646196636329 -0.502455036633999 -0.481636688280788 -0.61997760039462 -0.24771155058866 -0.109076413222961 -0.183544406662867 0.277663765640902 0.545822469740499 0.267364329492097 0.176450462875518 0.519177863850205 0.691557699856023 -0.0638447915964976 -0.356612419898389 -0.0364868715847762 0.00280552401135087 -0.306044421499035 -0.685200623198632 -0.632468110937412 -0.124529067151931 -0.723302236110255 -0.692766474193451 -0.760334459652701 -0.88182300051863 -0.947666029048447 -0.942762923974585 -0.972005384347546 -0.969736802700955 -0.961690965955759 -0.957110910870709 -0.956244945661227 -0.957345596257213 -0.961149259530252 -0.95422904221264 -0.950767845425237 -0.955550439692949 -0.950297796529839 -0.900274275171395 -0.923501551644682 -0.947565598647166 -0.836793404442361 -0.808278540717982 -0.885923645581528 -0.788429599672566 -0.963063284925754 0.42420275017052 0.93142721263183 0.925088783601496 0.92010773147727 0.994895251824696 0.96024945208687 0.568626640466398 0.411431509120483 0.625101666148678 0.751054679436836 0.609707303377587 0.35643223438773 0.769366638576502 0.686412001534142 -0.588378255502999 0.0115812250957476 0.704067612809593 -0.330287738686115 -0.779062876302356 -0.373569154952768 -0.0424434191636075 -0.895537278254274 -0.900786174511446 -0.0509811567334971 -0.492947435753735 -0.903058835112629 -0.741213763665121 -0.687440333774415 -0.805083713019055 -0.682780655953575 -0.595566186894436 -0.627888051237024 -0.663489896672669 -0.591150506119919 -0.602992714528127 -0.527007637471797 -0.606339399597127 -0.431232221859375 -0.695609959450289 -0.737701145943746 -0.530249101279186 -0.492583815262571 -0.505866392816435 -0.244603641811037 -0.378368652509829 -0.304339414972443 -0.351802131534277 -0.194587449624294 -0.0620653714286492 0.316939304609789 -0.0993655343190019 0.159291004555238 0.0639467259553322 -0.19038981881044 -0.288363522729917 -0.666198899038463 -0.79247303359727 -0.849580812657222 -0.789059698714763 -0.925687157221855 -0.921867598311056 -0.911571307722545 -0.914628759056764 -0.942335922937959 -0.926986399947775 -0.938789776196822 -0.960961374352871 -0.975779734395175 -0.972312361890087 -0.88961749991549 -0.741611626098778 -0.931617289311718 -0.934382079182325 0.330787595649106 -0.143885663802633 -0.90208586438722 -0.462152941499593 0.844362242383805 0.132948244898027 -0.831043977324796 0.743683538423079 0.933127672797305 0.742811505892346 0.803211238083912 0.923446841247125 0.906868456270941 0.756975247887229 0.815008606596098 0.848162812495013 0.939425467200095 0.981923342046102 0.98663800705526 0.975223118917772 0.982446964754067 0.994531757504554 0.988149810732988 0.991881827910789 0.995547680223137 0.995236167859857 0.98331536312492 0.995060475532612 0.990660275892276 0.976188447072962 0.846140125994396 0.97431518598126 0.962159516282668 0.932000233084714 0.669463707621597 0.349952338021411 0.52681643670824 0.251140188178275 -0.45976954744188 -0.530204304964495 -0.364866801615407 -0.70443967890611 -0.657755721067848 -0.516726779050133 -0.571146030804097 -0.776007366879986 -0.765535794936727 -0.798223772870951 -0.359502879231853 0.543566328759533 -0.185201506852933 0.151860779198522 -0.127373232537769 -0.307762157311177 -0.2108857114888 -0.371119656774899 -0.569760473822509 -0.520711646433616 -0.521872954992317 -0.473459493270459 -0.393292882154059 -0.508672976322508 -0.590338810293324 0.0706611873199308 0.439835709454823 -0.472481031482567 -0.633835134892677 0.500473833217362 0.396535382888918 0.365717278626552 0.834132359951572 0.924321244984059 0.675826356454559 0.416683857205271 0.804091078568708 0.880065798561925 -0.983221938506004 -0.972683227637727 -0.168374205555585 0.412982600925001 0.567939991634383 0.594962336401971 0.443121338846522 0.546494779612871 0.710428338560875 0.678860898840831 0.440745712840735 0.640918589622747 0.575012187917999 0.725432842257068 0.669442797625339 0.271169795542295
-0.491411851745784 -0.102453284074707 -0.366050431668552 -0.025165851846071 -0.457717424229312 -0.241782129530215 -0.302152702982153 -0.546535814565342 -0.558208417791435 -0.418197688071632 -0.188884447564129 -0.597891777858689 -0.515571299848333 -0.228265467635048 -0.30196187044243 -0.209929586293921 -0.35912510712234 -0.0599335365133245 -0.0531756071315789 -0.439386834204511 0 -0.479036630842121 -0.064656250396037 0.255739423804117 -0.051020361854099 -0.427316282105534 -0.146062782816217 0.20104722460179 -0.230746944400874 -0.187174936480964 -0.180923959851238 -0.0461727372439876 0.152548710791569 0.694403915303111 0.778670528488897 0.641815634051129 0.581639061508694 0.689387316270877 0.810511450361254 0.519455898780055 0.248346311879437 0.682268462599442 0.179036159336794 -0.432545198911139 -0.486794509255266 -0.00661714340754452 -0.424626357834126 -0.674959716317586 -0.82773046469804 -0.842160796757376 -0.824440767357988 -0.50638615786906 -0.789149005489356 -0.665960394292693 -0.653830133004133 -0.783159401341381 -0.811616384474385 -0.841511464803841 -0.802113247549933 -0.78816799202622 -0.842659423729434 -0.774425235955072 -0.779356441863423 -0.748606092768387 -0.82215855246486 -0.654664898605682 -0.61948852220859 -0.639802577783981 -0.265152785807292 0.230533642226045 -0.0759054577943807 -0.111750631607837 0.322348099691758 0.439175852964345 -0.427677832671001 -0.491241685387657 -0.275796206320895 -0.427049033635025 -0.558943708943615 -0.744832347047314 -0.738281266338637 -0.41391703462661 -0.747717682735645 -0.661653235461882 -0.780705896795349 -0.847507573404799 -0.901429815679086 -0.915904939982652 -0.954047472014098 -0.944675952027628 -0.910453431431567 -0.911153746199935 -0.914687203587479 -0.91608573380447 -0.921729866478157 -0.914903392065909 -0.913306557423642 -0.905903883097879 -0.891645158689137 -0.821983299646577 -0.86411701363138 -0.895877961635248 -0.718082834079213 -0.690345907658799 -0.790665090779518 -0.541636413454602 -0.949396314689285 0.567271037127095 0.921374006646373 0.920025423130492 0.911524225658214 0.992241412796256 0.963177431435861 0.812770335884316 0.801501219737256 0.815821960305075 0.857285602664253 0.890232419866265 0.843563018435297 0.909205851062843 0.904184156434282 0.691980180056369 0.828968878562619 0.887604307097201 0.717587467273751 -0.253377099720559 0.490199902020211 0.680786356415713 -0.606236004125354 -0.821598390355224 0.282292866638243 0.132473218929691 -0.821540798124446 -0.624482094160096 -0.678395034059666 -0.76122523055714 -0.6937621370053 -0.640137452184603 -0.686903177333646 -0.686819565380902 -0.639057554793489 -0.64524227377776 -0.542675875821823 -0.634150477999766 -0.506867662147781 -0.737738830056436 -0.770168009338323 -0.604308229952568 -0.59369298578623 -0.62836661590306 -0.422871845613563 -0.565371796264723 -0.545203484493349 -0.510525768769034 -0.360408938985746 -0.33905888467443 -0.0453164600395644 -0.47230198126276 -0.219599782655317 -0.280539083645158 -0.514669776603074 -0.478867959506254 -0.730410203895953 -0.818312964319151 -0.836911930535188 -0.750386385722039 -0.921432005611843 -0.922676322786907 -0.907705682026561 -0.907615367089339 -0.936365923686937 -0.925275517233911 -0.905269640118794 -0.941593162687432 -0.968979029986236 -0.965083517725178 -0.80422663885023 -0.57560964652781 -0.881891247269571 -0.876897583573347 0.576449940341268 0.133578846427005 -0.824658716003502 0.0577600534919378 0.871891814459685 0.388730078158116 -0.676073889916787 0.851431662910649 0.940258993466651 0.835524953967232 0.885352609460108 0.941397581062156 0.926919568224818 0.821711481602771 0.862835913266764 0.87786232434137 0.955103543626336 0.985734685993044 0.989059151005339 0.979718863351789 0.986040093596201 0.995519368360216 0.989135089487012 0.993207928040262 0.996168665618728 0.995414483327319 0.983208514464124 0.99415877953823 0.989739302095586 0.97208895318254 0.806960948823754 0.972078226606552 0.956929681070784 0.885430773087269 0.333798698220464 0.252686540814049 0.437418993286265 -0.0485629474977511 -0.618747665891099 -0.536897483022247 -0.459726911742783 -0.760171930399737 -0.714239023300091 -0.55840896225212 -0.654294416109227 -0.818273827275618 -0.791531970713681 -0.814484874185304 -0.546979637925821 0.418479621971897 -0.279591742865136 -0.0870582080175146 -0.352709625733168 -0.55468170805984 -0.470196608570533 -0.635783187756691 -0.75280682884483 -0.704030788861774 -0.734189375282998 -0.741253272300673 -0.64403083164647 -0.699316124712975 -0.77500862846943 -0.380904433541479 0.228091977832888 -0.615365850582415 -0.712654114537222 0.357871568206103 0.366568918862743 0.178883068537855 0.69974990927167 0.911682301591658 0.832199148055332 0.60865235354444 0.875341346848846 0.965193548298419 -0.977678029844897 -0.975476513022921 -0.484956368881742 0.29023531889931 0.319705143482932 0.521609842622637 0.348766027259306 0.552753119809956 0.676026053384595 0.656096099239129 0.282799740399437 0.607514917530807 0.555728165363767 0.552848087141786 0.632380852841566 0.0239818363261308
-0.482975384851131 -0.0755926024147832 -0.345340831188498 0.0546030703158371 -0.356757807112821 -0.217957815197109 -0.275910509945678 -0.371314859687127 -0.435319167685904 -0.494564055355143 -0.26549465828476 -0.364060246838956 -0.445820329242907 -0.445065829067457 -0.253612158179519 -0.130810590717783 -0.390477540290048 -0.471408012868014 0.0427983601473345 0.0361109060513299 -0.479036630842121 0 -0.567186467314738 0.0489587039979029 0.179181786394989 -0.412876000138358 -0.254928419684931 0.0386523727437436 -0.270737647679445 0.024159395256139 -0.108816393423159 0.0532584782938761 0.227088205943661 0.699875069860244 0.644119220628433 0.528373318143121 0.461596937962879 0.624139671632008 0.782605908333335 0.278756054270863 0.0058650432702495 0.533173430073374 -0.135749747676453 -0.610557447865596 -0.663203504938515 -0.343351775083181 -0.559374317806017 -0.639197879649761 -0.823497854769636 -0.838664455252393 -0.782321315753808 -0.473767249147 -0.749998341555299 -0.63690220902968 -0.585169226741701 -0.735586412776109 -0.78618854997374 -0.810359400758864 -0.756920697106445 -0.719454758044517 -0.774128262723772 -0.690830184446299 -0.659506310031559 -0.682938156024247 -0.75468038068701 -0.574455994354455 -0.507453481934512 -0.543070481521621 -0.144172004239639 0.280168370147357 -0.0210364350840884 -0.071931039034356 0.314801522147216 0.452226718730434 -0.352064841256733 -0.458251634347799 -0.241004211030369 -0.332129248140741 -0.477851166187281 -0.712860360059041 -0.706427594090978 -0.263538695528415 -0.69637113070988 -0.609961560372361 -0.708667727853913 -0.80656809593965 -0.89659566352589 -0.917922789138506 -0.948099685110061 -0.940260343446271 -0.936549198392579 -0.938767213588917 -0.925879307084558 -0.929057949651206 -0.935249924858155 -0.922681063759991 -0.921210011533178 -0.927463868295706 -0.918759510465929 -0.829150732414864 -0.854040695404636 -0.893432764348657 -0.755343414193203 -0.697556530238414 -0.776409718594426 -0.527229620687348 -0.940736326496339 0.588356191135199 0.95183633724152 0.956968856438415 0.932331071776617 0.991853583715067 0.967275945553536 0.763083545232793 0.770441355397314 0.80434902249282 0.851882802594715 0.870512851291054 0.786689494264059 0.901813937009054 0.886999413310291 0.40431173190339 0.731299694837243 0.880697184327505 0.60654595454864 -0.490925112480251 0.274500355087802 0.567624991027683 -0.742113944384858 -0.833641650245594 0.218098095795048 -0.0592939313132745 -0.840554325375746 -0.586443134715727 -0.679060125925652 -0.777102440141964 -0.687742334294287 -0.620739682398321 -0.682297179712816 -0.68133823691678 -0.624803807233536 -0.622172949047135 -0.512339537425824 -0.606258312754295 -0.441608683697814 -0.708864512096328 -0.757029450139106 -0.558769643491357 -0.529338654764152 -0.566728116396858 -0.358553159384413 -0.495727118997202 -0.462384237605369 -0.461186810192369 -0.312184444935184 -0.254222713963212 0.0514763939219319 -0.370061149366733 -0.099713458299046 -0.18432933227746 -0.401632279191527 -0.404532785011076 -0.694814926244041 -0.808056290571961 -0.833328299995961 -0.734221030498795 -0.909179560553632 -0.916053124651634 -0.892759727832181 -0.898418624174024 -0.93854879112193 -0.921062169299657 -0.917838208683991 -0.940250174087284 -0.964994909697143 -0.964381046919284 -0.860220248603086 -0.645576888856045 -0.894322405672533 -0.891341110336562 0.439971555135493 0.0373685745119885 -0.838567352298648 -0.237682532090605 0.864036697783965 0.295829420352436 -0.757958347260701 0.807713801122374 0.947973994336236 0.827022222561041 0.868593369276355 0.951610123967921 0.936875754626981 0.820733724232462 0.869779574104473 0.892291662094251 0.953855868056026 0.985873962470098 0.989054550031005 0.980314236873549 0.98431123524509 0.994457369460015 0.991121739645841 0.994478285778092 0.994974495029526 0.994543097932364 0.982998830154569 0.991695819336942 0.987072887313369 0.976390715605563 0.844332985523837 0.961486669884679 0.949518692405328 0.897124140793244 0.501751345394997 0.260286623618325 0.501462290347837 0.213228845274199 -0.475749445023195 -0.457792996647881 -0.265946625369097 -0.67164795929561 -0.648316330839413 -0.491783748857971 -0.537819886999048 -0.767880065265633 -0.759689619575997 -0.788791254167305 -0.33118654855071 0.517422513984367 -0.202608115618834 0.1331748232388 -0.155773870284527 -0.394985490993 -0.312125064666396 -0.464427032371245 -0.594794173721556 -0.577798213434396 -0.621370678633946 -0.589316996868963 -0.460126047798296 -0.569203844008816 -0.646189233835133 -0.0960713961243869 0.363178295316559 -0.55472550222988 -0.752335700394814 0.470970537148666 0.304619088328631 0.42374635956852 0.774824532960836 0.939970802437884 0.934233777407464 0.805402952954324 0.947327751540996 0.99051995878677 -0.948072400652868 -0.967755748995999 -0.263963782158446 0.500045350104309 0.424823884875684 0.623351815653034 0.475727676031262 0.648674879878558 0.723742129221257 0.708253575554637 0.325100421623767 0.625688233934345 0.592119717606188 0.649523595979238 0.683295363652942 0.195462128491332
-0.477748403914992 0.0350114989591837 -0.355026996650914 0.0678694432800556 -0.321957166187284 -0.119628920906955 -0.23929447145414 -0.327333228011849 -0.281428326116789 -0.373245445421634 -0.310295030004259 -0.308307013083547 -0.235516385810031 -0.323208407863904 -0.259254674531552 0.00330590970833321 -0.261367125431681 -0.521656607838287 -0.305083977088184 0.00742385363340412 -0.064656250396037 -0.567186467314738 0 -0.361111633747202 -0.116477102898646 -0.602632474495791 -0.344295071322411 -0.19271998070579 -0.315281540170951 -0.256911696052781 -0.397087136198653 -0.172489803494556 -0.00647848655588546 0.562958289122057 0.529802584202305 0.420808944789399 0.470254601116069 0.610218882374156 0.725359931605697 0.239917217127583 0.0768879916692076 0.406546911084453 -0.217761950237594 -0.518059384425288 -0.66220850654756 -0.430612612305649 -0.57642596598064 -0.557063118359532 -0.817536964263616 -0.757114258216185 -0.687595206434843 -0.208502629181638 -0.71145364761755 -0.401574398784626 -0.302703776547506 -0.482062090250939 -0.661401909593975 -0.711531370981522 -0.512714035586932 -0.445453375362427 -0.675967652666652 -0.518056838008492 -0.449788767257436 -0.497583819427101 -0.619748131443779 -0.236379185257105 -0.116768650064569 -0.219494156518333 0.139454963563208 0.479850446227142 0.164817825840444 0.18253056290653 0.461061258440224 0.634084839877408 -0.00845282692307814 -0.219927999243913 0.0906131652356916 0.144799173538852 0.0118393081729017 -0.417839228918259 -0.31657316179495 0.352375536504313 -0.288242780129118 -0.260324891041608 -0.223431873014061 -0.485970941645056 -0.83501553071206 -0.876334084514256 -0.868785118556212 -0.867754254252105 -0.905891951095609 -0.908992339608707 -0.879042183845731 -0.900348256818353 -0.921075289010794 -0.903672162679861 -0.896542885281671 -0.917744313171847 -0.91491661466745 -0.798890315499545 -0.827658314146679 -0.886351804730304 -0.744018516931803 -0.66281782803662 -0.754730368753998 -0.53034069891948 -0.943220269161554 0.561378565318072 0.949309350721432 0.952295007317093 0.930587724565331 0.992597542075787 0.968649739480479 0.713588232756631 0.668750134762967 0.736464627389135 0.804316350581651 0.80396648770638 0.696851955476804 0.851622189120723 0.815076347796935 0.0745168440729437 0.592997196277391 0.839294278293254 0.418041336953279 -0.506075537483225 0.215468495859671 0.470949235410821 -0.749550289362945 -0.804361078680193 0.316101286642555 -0.092126011834288 -0.766646373967514 -0.170180693645199 -0.554380207520328 -0.741131139530091 -0.564569596911497 -0.456803111587931 -0.56793765960461 -0.574012887679656 -0.476028827836308 -0.486863085012966 -0.382742343832054 -0.49298105818475 -0.304577756339651 -0.621323034522793 -0.685489583560175 -0.417404395379304 -0.398527816190627 -0.379710502726837 -0.147526252532797 -0.303673836449642 -0.213912825856928 -0.304387615647839 -0.164947971126898 -0.0531335304328879 0.278939626969709 -0.141271066973187 0.20046095337388 0.158810577840561 0.0090974838900774 -0.0243177781605932 -0.532461773908415 -0.706338625526775 -0.773539501709234 -0.683939757526934 -0.867382643093275 -0.868703810030824 -0.838522071988928 -0.843975870808722 -0.910252509436885 -0.87489644226035 -0.866684384254527 -0.90086933455617 -0.947337133276818 -0.941633903208773 -0.73225316262369 -0.345690898628097 -0.85288127081755 -0.833876337388089 0.708995196051437 0.340165979451516 -0.765550438143878 0.207230208923666 0.910396709252683 0.536903002009119 -0.623716087798855 0.902250027274187 0.966458981947547 0.88254028631769 0.918095129611626 0.968611877035929 0.95817843048528 0.868724903854379 0.904557925444421 0.918009180717013 0.961316197403605 0.98566616493128 0.990997376636228 0.982523679068819 0.985851159686264 0.995125676856667 0.994605524307105 0.995582842333183 0.996011797937947 0.996527059108282 0.990305091922873 0.993948508984183 0.990903466904551 0.991543306179841 0.948164198603214 0.975946367739407 0.975703105295725 0.964071787402821 0.849681241931919 0.680682814297995 0.81538070545613 0.677023076835139 0.191406044212383 0.0793707635443529 0.429098409157581 -0.200552884469998 -0.424096045917197 -0.235956235381693 -0.128640485837944 -0.633810484084542 -0.628288552166365 -0.665049803515512 0.102266391869891 0.670420027814186 -0.0594484450358353 0.412894250062432 0.178170890147965 0.0162414075908656 0.0235709106573776 -0.107765132210146 -0.244092145371991 -0.145468332684854 -0.262051289450166 -0.0792489994871169 0.112951996397498 -0.120696712501545 -0.265597809412314 0.53359970513664 0.648899228826462 -0.328712040130298 -0.629523850276664 0.572168644251223 0.267216870714859 0.436963252285378 0.833236018866728 0.949719311868362 0.845090170541875 0.225755487082323 0.892632622893233 0.974706688366459 -0.986609634829204 -0.97653195852124 -0.588370794335955 0.00244520776441054 0.409921183816226 0.410350479151856 0.0752185325591175 0.286360886475942 0.656906140030884 -0.0396401910232544 -0.223558131044716 0.237685134178234 0.210307043233441 0.526302449401649 0.389284226390512 0.253138872442093
-0.464458524490929 0.0094850245733403 -0.29478054095704 0.0580813362830678 -0.32702606340815 -0.0999093659212472 -0.165018818942194 -0.354076009067014 -0.370298304967761 -0.234965597976445 -0.108997071370536 -0.370858905237742 -0.201727725419156 -0.00876963953529456 -0.104875131288617 0.0152575651869885 0.0382171553809427 -0.0678566435267008 -0.234264823243344 -0.234343455197746 0.255739423804117 0.0489587039979029 -0.361111633747202 0 -0.477279896216311 -0.70524044328716 -0.402572383332762 -0.0357870676573143 -0.232952956238286 -0.537986674453056 -0.503639687931613 -0.341316913985561 -0.0924089345158619 0.646548409597884 0.807456331337436 0.758764023591691 0.728031708583962 0.773839075419311 0.84002027814573 0.653563425882123 0.397134526955314 0.644552059464894 0.149854452412615 -0.241777856024937 -0.664792316131692 -0.508468838623792 -0.592224644597832 -0.573795902033937 -0.806643747970669 -0.723114847068408 -0.655100035869664 -0.192767467231204 -0.698424168883319 -0.337877659084268 -0.38898100288871 -0.582245099780575 -0.726115097518951 -0.77961877313159 -0.636187628726701 -0.677261541905601 -0.781988608349107 -0.656334807654092 -0.640284576260633 -0.682482738715094 -0.741053579601183 -0.470019464248939 -0.396655522625157 -0.452883535338594 -0.180763190758001 0.270491222707033 -0.0804082914797667 -0.0174964906572598 0.295937929487705 0.464868630184105 -0.241296795411354 -0.353956818930238 -0.0932117618910241 -0.133933775193289 -0.194213263791746 -0.522263885681661 -0.405027197252809 0.156979649700857 -0.393270402338631 -0.34617317042347 -0.40698679137148 -0.525349801349744 -0.816043476860912 -0.845130750293762 -0.792138763117121 -0.793267615328648 -0.808385413391657 -0.782509743919518 -0.731643600227878 -0.814244521103348 -0.865692720273597 -0.831027255971492 -0.818424240207554 -0.858081032755961 -0.846261314941703 -0.660743892404532 -0.738187847608042 -0.827706680445475 -0.58083463862038 -0.484581909276844 -0.607420649398479 -0.256430692620474 -0.939197151444033 0.59743209280426 0.913820801673781 0.909418995844006 0.911473020278155 0.99304623500335 0.972603562495136 0.872515461379775 0.827050213185965 0.813940915071266 0.862956467645919 0.919452186855617 0.891023669992585 0.920415113397051 0.920543183074788 0.822613039293894 0.862180218531368 0.90978701096469 0.847572636057407 0.187522704752967 0.564217752924305 0.704756931713115 -0.252424011770664 -0.713957063218647 0.400793508561733 0.315708970019112 -0.619867849039615 -0.147316886857357 -0.599622822950511 -0.752725239914003 -0.639300580582517 -0.575482817741781 -0.664161858302856 -0.642314963465655 -0.584722612483492 -0.594846375676649 -0.467949044740609 -0.565024312364065 -0.426406791140251 -0.668537543740249 -0.72011146126286 -0.527639123690799 -0.521151132281533 -0.532745767213308 -0.320726681340455 -0.474420704486377 -0.411486272855517 -0.454161780502807 -0.314587559170325 -0.262697808998067 0.00885945576527088 -0.396084686452058 -0.0225816448537912 -0.023570330985874 -0.20303462242346 -0.128481207302096 -0.601574637681482 -0.738017185506544 -0.771293275092132 -0.679758726511713 -0.86897158010416 -0.866048398754132 -0.834021489962338 -0.839082578244681 -0.898104063027171 -0.861153626589235 -0.818271795416412 -0.880192450168537 -0.941099154023076 -0.920512043618949 -0.447736571446388 -0.073251228304692 -0.78965295079678 -0.688791896109516 0.836677013410845 0.526905815495218 -0.636603475605765 0.691905910529661 0.934939387306875 0.689094899181058 -0.181217685389829 0.952542769019197 0.973446268429806 0.915274946210393 0.955678044676149 0.975785070707579 0.968071399499657 0.910525259711273 0.934151195727102 0.93543417247157 0.96881460279818 0.986621542548196 0.991961031045971 0.983247459313527 0.987445648868203 0.996025206150402 0.994947264269486 0.994953334836974 0.997164915997787 0.997600679164024 0.99130313125145 0.995845056699034 0.993795812594063 0.994410920901689 0.954701265827731 0.986041399987486 0.983098317147453 0.969901599708408 0.82463541889725 0.677750600129435 0.797560461049931 0.649096924441923 0.0586574550939776 -0.00681571707649872 0.253801342668762 -0.36577733129918 -0.482395254797135 -0.278225634789422 -0.262060725339478 -0.692953567746921 -0.667318808222767 -0.690826011529509 -0.183156782806297 0.607924991862075 -0.143471187764247 0.243712748493585 -0.0220557784217 -0.155125892621599 -0.165727572522002 -0.342732848620979 -0.458847129382129 -0.356971923062627 -0.458141300596283 -0.366291544363596 -0.13337987888162 -0.353888130789122 -0.519025346351421 0.3328248016357 0.610216053346974 -0.4307187953652 -0.681568070223871 0.414222217113644 0.142460459366419 0.258444133364607 0.759764085558723 0.896751331555719 0.446515005540195 -0.23092176567819 0.699235454456 0.862671019683361 -0.988590162273245 -0.977365404985697 -0.760781137595372 -0.466940213011695 -0.148779257497744 -0.114437894286308 -0.179785879552937 -0.099043001891771 0.359261100697646 -0.146615177395391 -0.270628184389366 0.254892291806794 0.197156363789962 0.356293950574589 0.388490068036709 0.0282434025560764
-0.453653509326891 -0.108872010876263 -0.326841250525506 0.0307633860710845 -0.383977841084713 -0.221826793922104 -0.242332368625608 -0.369321216918462 -0.46500765062896 -0.419821206663762 -0.121598868105574 -0.410989466614436 -0.445842245970748 -0.263009082101387 -0.172027502530142 -0.134262851818075 -0.273190119900105 -0.12178253378151 -0.00503967681728414 -0.297127642392149 -0.051020361854099 0.179181786394989 -0.116477102898646 -0.477279896216311 0 -0.558241070511073 -0.0655319665703682 0.0389331451138409 -0.150471265437921 -0.0749212411780315 -0.0641911973453088 0.118873122313585 0.593811874324979 0.838219450882251 0.865184606152088 0.791662569136569 0.722771471787494 0.74137091356722 0.847686662023971 0.620877553471576 0.322710238654754 0.5496580270297 0.100112636302588 -0.320491775601363 -0.702054460644858 -0.56268190655248 -0.631703888770256 -0.666280974545694 -0.793424963939065 -0.760971614909427 -0.737706635345328 -0.424657097617549 -0.748781790200223 -0.607681313770018 -0.592977919816926 -0.674380143549483 -0.745980989383016 -0.785196504916195 -0.731257362346132 -0.722724124569042 -0.78914019956765 -0.72611949985016 -0.699955863314 -0.707989621727619 -0.79290662771669 -0.620845137758746 -0.610614347784507 -0.640791262317296 -0.495979136299585 -0.150461718638541 -0.339585298403173 -0.33368463715137 -0.0486039211061126 0.00454718953478559 -0.504417118401304 -0.538258419624183 -0.404297422421303 -0.493571254718521 -0.492747153659862 -0.663718552791759 -0.620680735410045 -0.272365722803235 -0.61692791043868 -0.566490594784611 -0.66259678213447 -0.708568562603043 -0.840721103691205 -0.858599636778389 -0.839429828406649 -0.816341491994365 -0.776027564378129 -0.734216316769133 -0.692369838397507 -0.763646025955028 -0.803659265555658 -0.756711527466536 -0.75167579375715 -0.782916011357867 -0.758157769629131 -0.546608749327993 -0.620751259277574 -0.708269387247973 -0.450726526924547 -0.349859532172862 -0.417929683401688 0.0488522087456692 -0.907960071505245 0.669006043912638 0.919027395858175 0.931504228963061 0.911017700339424 0.989454828167941 0.964253724652704 0.875060973806204 0.869618875575945 0.872329692426565 0.893097242846898 0.932043740682343 0.909985641501794 0.941747831308231 0.937483631611978 0.909379386411199 0.916417721367939 0.926246815753452 0.889473412591541 0.360814276493589 0.545555436249317 0.706326251965801 0.0117747266328825 -0.691823460859594 0.285846158251829 0.274852750069501 -0.621459862430641 -0.406791768182395 -0.668139686260308 -0.766683135813926 -0.684220721845401 -0.648030391289826 -0.72878525977592 -0.703304657173499 -0.662743341031026 -0.671529541472538 -0.569579562410145 -0.64315727960117 -0.542671908293539 -0.723837108415518 -0.73818819679251 -0.613945219245256 -0.610540498148372 -0.63221903106524 -0.463773382492521 -0.586466830423796 -0.565437527820835 -0.556602371906214 -0.452430647038091 -0.45213862405665 -0.302338961076832 -0.550941647366324 -0.326689000740393 -0.332998169036256 -0.457554883691801 -0.3818130195397 -0.66793899150265 -0.766391520739173 -0.790863961533095 -0.714929368787867 -0.891067351339385 -0.890306831765241 -0.864027247863938 -0.865606901146526 -0.907451952270119 -0.884697096341853 -0.846397706873531 -0.895782988149071 -0.947369903543901 -0.932443836522216 -0.559081771530594 -0.194052478075487 -0.793342260789962 -0.70080062915627 0.796387935053038 0.465728388335316 -0.607517236726765 0.629440789281592 0.918769178790596 0.648478173547398 -0.139636226967819 0.938910640464835 0.96862472375798 0.910809512046785 0.957824447789353 0.980651087234839 0.972029701586665 0.921150052882922 0.943621623363307 0.946320362643141 0.969079933689056 0.986125282079337 0.990697899322045 0.982310460026464 0.985647691986114 0.994483281787513 0.994008108437859 0.994509195738096 0.995914003526762 0.996369398889005 0.988551004907054 0.99376589363934 0.991838240288755 0.992250333581161 0.937805873210817 0.977526738732632 0.974587921862012 0.950315094911865 0.722425700813952 0.518506976737155 0.70297626553829 0.472521516678549 -0.236584297685655 -0.219103497458219 0.026576387274486 -0.531791194720159 -0.582968439914698 -0.382917417267405 -0.404656463238594 -0.752460250258989 -0.723356776283495 -0.730164265866251 -0.344271381371237 0.501894292114534 -0.223146956439776 0.0889002100716423 -0.18180320223327 -0.372528146486657 -0.36119110280994 -0.49956732405709 -0.571001432049548 -0.516017198320741 -0.588472917258062 -0.529645117115005 -0.358366646091367 -0.52189567885532 -0.613796191198333 0.024012228196921 0.432476306504198 -0.51887703557676 -0.646288001756303 0.340618224163462 0.114482515008067 0.287957113820597 0.81283900363101 0.936375106055029 0.882798463518658 0.615845363900456 0.885881868736448 0.9717792923391 -0.973965508723253 -0.962845735156575 -0.650724335481851 -0.0241651513936937 -0.0288002284435738 0.191366307934079 0.139920111283633 0.316334037119182 0.418205670848832 0.188481981849769 0.0247037403369683 0.485180832820292 0.256886598120538 0.138453716981974 0.372966438048743 -0.0691032270917835
-0.539375971706152 -0.169342833645967 -0.412884012317696 -0.0565495195395975 -0.45663360282755 -0.324626342605799 -0.371608782427963 -0.472282428606373 -0.515586228674397 -0.52912359527968 -0.422164773442044 -0.511472160150271 -0.552174535381492 -0.565321411603617 -0.486122903335774 -0.361220931606746 -0.482591719090498 -0.515290525062997 -0.315918501959201 -0.585212764823656 -0.427316282105534 -0.412876000138358 -0.602632474495791 -0.70524044328716 -0.558241070511073 0 -0.442775508990562 -0.376819288680277 -0.0512006875685918 0.312511362307938 0.208522252083043 0.30832630206386 0.544192383035227 0.7809826374385 0.720321679344151 0.624781279427367 0.588105476618313 0.624844007780075 0.750070780161223 0.357405817214017 0.0545170716501794 0.0700869240213073 -0.317300805026454 -0.621365195563217 -0.831721452173945 -0.706162228925803 -0.77098530131382 -0.751929170931848 -0.840667366273753 -0.80525234438864 -0.772461048292257 -0.492052024113264 -0.765815057032283 -0.63428315768774 -0.639596924570357 -0.696628684470483 -0.758362167719782 -0.790979545389037 -0.722886388216262 -0.682332926775825 -0.776006011968761 -0.692559404085756 -0.649807552790687 -0.677707347649993 -0.77421066242745 -0.582629971657753 -0.573379738967268 -0.613854746441652 -0.412434350469007 -0.059800144524223 -0.314330441662737 -0.329451593996224 -0.0466348600498649 0.0858726796581258 -0.484623943468609 -0.553359136471649 -0.398664829201797 -0.465062935212528 -0.466078696257125 -0.690424517608641 -0.638848772888485 -0.174891325835604 -0.604221643327417 -0.533950453456254 -0.585144456461489 -0.601717303611654 -0.841766481494739 -0.869701705448363 -0.795675933806913 -0.770852739094077 -0.799750283182306 -0.758765116205203 -0.691558162977883 -0.780714872865361 -0.822387871010305 -0.763326238127856 -0.746486127459288 -0.811855033229498 -0.806675032373864 -0.578236554347964 -0.622660578739693 -0.72165609913885 -0.506590990549252 -0.375177038052943 -0.426408223553341 0.00430502622116583 -0.890331284345756 0.663641573922544 0.941506183097083 0.955381957210872 0.921032311676737 0.98645941549652 0.956943487067779 0.805246611579031 0.786701927825882 0.823321532952694 0.859312973949909 0.879058082139671 0.844113973217383 0.907816656974497 0.907522107762523 0.757873576971694 0.808809351124312 0.875726805115528 0.79390477283924 -0.0470143214142445 0.313304041353494 0.583454557099022 -0.487448860152729 -0.783392074158618 0.195883110673434 0.0484487107419999 -0.712131083557096 -0.349242114952453 -0.712058144351574 -0.813417814677958 -0.718516824972346 -0.68293098187431 -0.746785316495847 -0.73090217608423 -0.674393071548024 -0.669270042979648 -0.558190808843204 -0.640347698254 -0.494082241640257 -0.731225566080916 -0.75505154776608 -0.621633317056329 -0.577168116556826 -0.615484951876877 -0.450441351319735 -0.588272961295102 -0.555022613586914 -0.554809793142954 -0.447541111801749 -0.426513155874826 -0.24311272125164 -0.518217521747729 -0.248467965120376 -0.265010916140363 -0.40614293920717 -0.349349990389585 -0.68854567291886 -0.798646483848018 -0.826037921815082 -0.735811973258332 -0.880832235351363 -0.883752010940598 -0.856229205070558 -0.854927045437568 -0.913371132716478 -0.881057508878514 -0.860640554477731 -0.891283713340146 -0.941765966875554 -0.932331154268689 -0.657641104469256 -0.244628745782767 -0.80735532652006 -0.73411152994937 0.745350038056542 0.407704161057626 -0.639617788825844 0.480831400663133 0.90788374510424 0.602433667246933 -0.276971250942867 0.919228333116452 0.968118833349107 0.900336329204225 0.951453397704898 0.982750748583528 0.975599754789071 0.932288593836458 0.951326621989858 0.954405131886794 0.969688466014684 0.985916973349513 0.990403044357718 0.983144136117424 0.984898898020187 0.993571070448517 0.994941667623078 0.994955238441686 0.994751258313117 0.995660288401647 0.98812847631169 0.990080614348478 0.988424761687063 0.99044052179303 0.950089435431209 0.963103677560613 0.969584481594762 0.945788785123259 0.760394623632132 0.483688722321402 0.73688872843103 0.570154363734703 -0.0865092161691676 -0.121707976405598 0.262730208772612 -0.367867157127803 -0.527460217093322 -0.302759078484963 -0.233783310935481 -0.695185128049618 -0.671143325295463 -0.699700259771405 -0.122186645515705 0.592430115728615 -0.144511614970467 0.269856336496792 -0.0096532785771072 -0.241383657070532 -0.244990347727086 -0.377315152878068 -0.45360268244914 -0.417455690216238 -0.505103170469182 -0.389742093441745 -0.183599794881013 -0.43196053040147 -0.525421615083016 0.265260739409053 0.462255232128516 -0.566636594781286 -0.726882489526655 0.213810254200045 -0.172822751781717 0.182717195958415 0.75828187233115 0.938739004651865 0.867740156976449 0.433836324992728 0.891740832100934 0.976567779507005 -0.966768126806697 -0.955285941677462 -0.613433012286282 -0.0594607557290256 0.0120303063226197 0.0705330852972143 -0.134458674264599 0.24577226112767 0.426454927679787 -0.410335225279997 -0.379424974664133 0.359178986263654 -0.246927429770989 -0.107044322658533 0.0807970454000242 0.118074773935663
-0.50338088124635 -0.111258406970601 -0.386230404946732 -0.0629058168145922 -0.407539501067878 -0.247181935392419 -0.323934971726469 -0.409128540469768 -0.389262270596113 -0.402832232432485 -0.360935675284641 -0.457584111305347 -0.376953141202403 -0.405044914340074 -0.411970972675073 -0.235416838130025 -0.31389378256462 -0.447282445400955 -0.322401978665701 -0.380875814520526 -0.146062782816217 -0.254928419684931 -0.344295071322411 -0.402572383332762 -0.0655319665703682 -0.442775508990562 0 -0.497560829620558 0.283567713617815 -0.270606104778425 -0.168228600793965 -0.0710473059606877 0.440657542452417 0.751814601029921 0.789256316641088 0.729798964690413 0.701760424353128 0.679196052978886 0.756199091368817 0.509392293612369 0.232719068007254 -0.0587223308556444 -0.11947212764714 -0.226726606117338 -0.64272936172356 -0.60142302457015 -0.618141223441915 -0.576682751449667 -0.741939090086858 -0.659503149356542 -0.603403802733043 -0.287576175728429 -0.69499297848461 -0.41406644834111 -0.483315131021421 -0.600652089342773 -0.711495225620046 -0.744867444994863 -0.661997453725901 -0.581893996440947 -0.73511383015369 -0.610102729109 -0.563651893771436 -0.59721137265379 -0.683652650130018 -0.423843427616655 -0.389299058695255 -0.456968174212903 -0.332558877478922 0.0254099037866778 -0.253177494058236 -0.197996504072654 0.0379642708515274 0.205985622791208 -0.330951305389042 -0.385925484827443 -0.21713522420439 -0.227066321347714 -0.179530367560005 -0.456147788373179 -0.346667250445505 0.16909196319914 -0.231666640645154 -0.192615458192763 -0.147409717088339 -0.0513432567140954 -0.553885481874011 -0.639579910241065 -0.239336027910094 -0.218568219272746 -0.199370323909371 -0.106484406560923 0.0524861104048152 -0.338202279989752 -0.546796620333735 -0.430818586090921 -0.40517281856737 -0.591627914911244 -0.613445339055691 -0.300920495942411 -0.374645271862444 -0.545326471210373 -0.306605556880861 -0.154710262913136 -0.178556030745738 0.205452227277085 -0.882885744675961 0.66644865982767 0.907611173669584 0.924416704438529 0.905098708630979 0.986739657602945 0.954425450410478 0.82657142309049 0.791769147126584 0.815995119131654 0.852199994629423 0.876570201817672 0.860345383563643 0.891155806548966 0.893283713317032 0.803796085315359 0.811882705888188 0.854645576823816 0.813003405266499 0.38573017088264 0.427119547606396 0.610300667240788 0.104566134798959 -0.518438086033893 0.345246109315984 0.266293185341068 -0.282045601630616 0.135837907351175 -0.611097860467299 -0.781478680323591 -0.635805692430656 -0.561803473134329 -0.689178382469377 -0.665751837111503 -0.567696755523746 -0.592627692472904 -0.462679522581747 -0.554212403949006 -0.402573868593274 -0.698657240961401 -0.708982029018179 -0.523067997108102 -0.492406631749086 -0.499707051412238 -0.356766791652227 -0.515294404048581 -0.449908646620295 -0.500389191199436 -0.394634948111981 -0.358054898455712 -0.165816736490246 -0.447483834123695 -0.0984761781173468 -0.0692763241599863 -0.188065582933818 -0.0975591018163372 -0.575907758744608 -0.727625968256863 -0.767889639318155 -0.657284612895283 -0.827584576502001 -0.828673388136059 -0.778405331114867 -0.78129421909181 -0.873729486515579 -0.821636390505218 -0.702868382682509 -0.798836697223933 -0.910294848676129 -0.864343994993717 -0.210026722896763 0.157687447784435 -0.652862165845688 -0.425102668849894 0.824334504437832 0.567973021281685 -0.333070497363016 0.715661145967429 0.915655480249549 0.685115262862331 0.219020773172162 0.94115666968399 0.967338653582886 0.907009299798634 0.964863677719401 0.987390498182901 0.978692688531483 0.944862317677485 0.962753901603777 0.964234985347348 0.969479949127052 0.984482985973491 0.98934096573499 0.981107550343283 0.984743221183372 0.992809934451698 0.993067065690935 0.991931145998513 0.994462253045878 0.994891308847381 0.984518322907586 0.987851957361461 0.988477988943754 0.98929053193362 0.956830885403033 0.957843030241248 0.96422784172448 0.945392407583509 0.78403287520696 0.592020609515527 0.777362719700889 0.688724511019995 0.225482063447675 0.195601972582599 0.470003591505075 -0.00628930707264271 -0.3403751331951 -0.118717175389042 0.0218087076568587 -0.554576556523964 -0.514694568537287 -0.549524174296036 0.0639213043788043 0.62558320822378 -0.0625227465057922 0.363741359682215 0.129065915964569 -0.0218111776458252 -0.0863208701556155 -0.198441123375271 -0.240358785974853 -0.183848483422063 -0.332197796776814 -0.142901411761354 0.0861585411786012 -0.192523968175532 -0.31740066025541 0.458454784455587 0.615063167710456 -0.477247281436015 -0.618616374421464 0.21587054786514 -0.199930157512318 0.100311714359734 0.648962716979965 0.863390828863052 0.253657120034326 -0.403374936772544 0.601917763649859 0.845511023822335 -0.977867776469121 -0.955813337838841 -0.778304987097643 -0.574585436548712 -0.298766820894935 -0.453224971178267 -0.543476117891488 -0.402726299879513 -0.37297752192653 -0.607978667352772 -0.596427498214169 -0.189857534609389 -0.489460399375476 -0.248808543111812 -0.145140360874871 0.0404143753391377
-0.461485610499882 -0.0558374579081128 -0.305200113671002 0.0469019145739308 -0.353419629061455 -0.160761064334162 -0.194471788168619 -0.352802833041535 -0.385427238454565 -0.30772304004802 -0.101712379832125 -0.35643986219042 -0.267969047811637 -0.0947383174927409 -0.140828115298768 -0.0299405504847196 -0.033647087728168 -0.0626670367091739 -0.14621035905569 -0.159718422305318 0.20104722460179 0.0386523727437436 -0.19271998070579 -0.0357870676573143 0.0389331451138409 -0.376819288680277 -0.497560829620558 0 -0.473145710223919 -0.684271600006075 -0.358518172827829 -0.284255055908224 0.137448150030839 0.804951227327482 0.784095989757474 0.702608120765112 0.665536432097054 0.619986580624094 0.710973743301247 0.558919141755876 0.332946249886269 0.282610484855872 0.238971279554017 0.0928942866409482 -0.496019012292365 -0.46017669213848 -0.457548387819701 -0.50690258137024 -0.71778651685755 -0.595477927803914 -0.580079077929296 -0.22726899116506 -0.690232076475398 -0.348775590980889 -0.443663672241613 -0.599290083537934 -0.70058821066468 -0.755992080659309 -0.669828382300536 -0.68746108446751 -0.788521952426761 -0.70895134563512 -0.6604244739098 -0.690638894492165 -0.754153105962119 -0.567080709898991 -0.519841170905235 -0.561089399457111 -0.471755147769846 -0.127511713439283 -0.34024536997826 -0.218912670138495 0.0476074234284557 0.116114729068348 -0.400008632755289 -0.383976546301369 -0.238463951413861 -0.28481885943908 -0.213240350803875 -0.403973316157939 -0.295790039737559 0.132580799682021 -0.181795521718831 -0.134275773308139 -0.140562960242188 -0.076565027421687 -0.295082925286867 -0.329935936504069 -0.106638907410233 -0.0572250736011925 0.156320821202109 0.231187334298604 0.216844284482877 0.00863452226121873 -0.0932545228970111 -0.07841059153788 -0.106299227931323 -0.189268139987429 -0.214194648052591 -0.0463309074970246 -0.10711346429338 -0.211015663208978 -0.0568430477092921 0.0299416954863335 0.0807275728656864 0.402696555687176 -0.857988578949381 0.691159578680487 0.797404899630808 0.832982036748499 0.846733488104386 0.976701948922168 0.924207056074402 0.832355387938122 0.815071547524455 0.834580730651631 0.855311949775307 0.868579054812365 0.84486790354276 0.886208995228138 0.890251685288556 0.835266605206651 0.847404427394353 0.904417882272042 0.875380590785802 0.626990585409595 0.671933854784378 0.806179039568717 0.618774490343788 -0.0917807036662617 0.556568318302675 0.599288267049568 0.118064986268219 0.147599003128832 -0.51741503885272 -0.672816693697288 -0.54303615651127 -0.498272086848755 -0.625804280482175 -0.588087237314155 -0.501665066758797 -0.510252850678217 -0.39419522768645 -0.487296413699012 -0.396119654866503 -0.62737547396987 -0.659774364423672 -0.477731230141368 -0.511434246147728 -0.497296244014278 -0.365626735028618 -0.518897502976011 -0.467714608833042 -0.523688313397738 -0.41455464914783 -0.395889065429994 -0.254258653459527 -0.540418781444079 -0.190495863969627 -0.13744588722494 -0.252536052001316 -0.0968424144136103 -0.525958777821434 -0.648085094153463 -0.679673144549536 -0.6009562660319 -0.765507683279842 -0.757411035369491 -0.711840334527888 -0.689821359869735 -0.801938278536236 -0.732827019498922 -0.514885896543428 -0.666818848553873 -0.846062462498615 -0.721644652672478 0.103133862776181 0.264387149099841 -0.411335132455996 -0.0760252667409151 0.805559437258886 0.553628144784132 -0.075051983923411 0.727657185882119 0.88880673864226 0.644446801479359 0.380687411303202 0.923498705896669 0.94838092797092 0.877802637403381 0.956315500730446 0.982172179608648 0.968899266130749 0.937851154631323 0.960190149446817 0.962614211463437 0.969336815546438 0.984019638978821 0.988713444242724 0.980347938680688 0.984009553426231 0.992020958799203 0.991798625088445 0.990486145048366 0.993374935759066 0.993494381885491 0.98167011785363 0.986397228845212 0.986565797495326 0.9863018549193 0.949444710255543 0.952419197344977 0.954150479769859 0.930382974348294 0.747659895782221 0.591144734835302 0.737297330513286 0.610783207796184 0.174630960477409 0.173623071216039 0.370505025629177 -0.0841801461613563 -0.323111526240641 -0.128410135317049 -0.0644163218556151 -0.547100978246497 -0.513727009686079 -0.538187726720589 -0.0656014927829194 0.578404448272283 -0.113864909240074 0.257340295648874 0.0163917521551022 -0.0996054641880108 -0.15092125069503 -0.320049401700044 -0.351853325132836 -0.276337542158775 -0.407035269797409 -0.282563834452004 -0.0197354863355539 -0.243284586643439 -0.402630774766765 0.338981200272799 0.567569772971355 -0.382000585586598 -0.556107658605447 0.304761186404276 0.0440297043918451 0.227033658081856 0.667529236954571 0.840492409458329 0.471565747232623 -0.168090913222681 0.606622756326093 0.827035727604685 -0.97815802600349 -0.96033235881582 -0.803372686648629 -0.649563835267421 -0.52576522823926 -0.524682383725628 -0.599171107477201 -0.528272667679164 -0.504563766008262 -0.529761870493091 -0.538895282404719 -0.239117195943161 -0.419621958645751 -0.405284952738278 -0.0871628165505434 -0.231749452890455
-0.484351696553447 -0.175955605040433 -0.365973412946588 -0.0569946608944919 -0.431999470157788 -0.30208860659085 -0.324778756516194 -0.425382165512354 -0.515511009876546 -0.49420253324878 -0.291505856182971 -0.47914612207729 -0.508057170785768 -0.448560112519472 -0.418399844970727 -0.278985878038923 -0.374616259501233 -0.446037104315905 -0.200369511290546 -0.341565412941037 -0.230746944400874 -0.270737647679445 -0.315281540170951 -0.232952956238286 -0.150471265437921 -0.0512006875685918 0.283567713617815 -0.473145710223919 0 -0.386680243965156 0.469814707935947 0.347867021710856 0.701437563697478 0.889712955421818 0.874602128306583 0.819048140265581 0.774236678720839 0.718026626087821 0.764372009281108 0.605293656163028 0.324118512409001 0.245263700622707 0.164623829235276 -0.0631060965470388 -0.570961981285058 -0.501660420456937 -0.51898189656379 -0.616242602405119 -0.757989925716931 -0.710745078823405 -0.708595481453964 -0.440760944688844 -0.796773621235082 -0.605261067175568 -0.64433972999435 -0.722857732781414 -0.802631471636563 -0.824322993886392 -0.770690638114066 -0.765684718149079 -0.832347813796537 -0.769109774285597 -0.757176199924174 -0.744418534996727 -0.819820518431391 -0.673737961732358 -0.658190449290184 -0.684121378303748 -0.602746014881644 -0.349831461183075 -0.457402741122891 -0.378677471879179 -0.128270428983068 -0.125046956792918 -0.544123497212389 -0.511122304466232 -0.416485802914878 -0.472782964381284 -0.415026691225101 -0.542555484711879 -0.500245465786176 -0.140708648883626 -0.399799508821884 -0.332089970154313 -0.337042801370089 -0.275537571177552 -0.463987586215759 -0.501147281854741 -0.326287130079623 -0.249726062354507 0.0355804884669651 0.139719575939372 0.118534179429812 -0.108599026084737 -0.179124942829519 -0.16807936681812 -0.205322720397036 -0.276711515888484 -0.289515569194026 -0.0914356514846955 -0.141530143076459 -0.228776311256217 -0.0553075089023788 0.0405094419651109 0.126055242467179 0.519555487072959 -0.822954594698592 0.742943935101499 0.901121538245729 0.932807475566597 0.894216406477105 0.975954870474764 0.938895571716949 0.870535532271109 0.852483960305505 0.86614050802245 0.874752820131695 0.890641207754762 0.878646093642571 0.896118793147291 0.898172094812416 0.864809123658058 0.862844839339641 0.897946699529711 0.87739508644008 0.610550646193907 0.632403788706384 0.79070380779292 0.571035597863536 -0.213607724596617 0.506028987649187 0.544450759475003 -0.0432720562724445 -0.0338169321245187 -0.550778395109751 -0.671499254802214 -0.572189036399832 -0.539352955008745 -0.631620177352987 -0.598685589296827 -0.547013513923122 -0.550312028276856 -0.448969049524572 -0.539826593602578 -0.455751385397405 -0.674355123069394 -0.7143306129252 -0.552155496849625 -0.583031779017826 -0.573233593836225 -0.453275313460989 -0.574319122652434 -0.548443288396461 -0.563188825905766 -0.476847796294516 -0.487387178287764 -0.410189867457741 -0.614194543981761 -0.358323274612577 -0.317455954457935 -0.416619504796825 -0.284506628666848 -0.622227063533981 -0.714211178338963 -0.732071174080936 -0.649241884254814 -0.802732677628394 -0.800185861447931 -0.774845009721088 -0.75117480434943 -0.836186152828701 -0.788961001132786 -0.638623344741257 -0.746315183478954 -0.880241018489203 -0.809974337207613 -0.100166388845133 0.196471511815013 -0.526325948037563 -0.248139716822438 0.823441709293078 0.586975999112988 -0.17224611880348 0.755118334933154 0.918280798035048 0.719332184874623 0.382368738497477 0.948668914103773 0.970355027807147 0.927891403437589 0.973124002506087 0.984633650853398 0.97944632493153 0.954732022433259 0.963465227274244 0.960571295385041 0.976738960783436 0.98815647442924 0.991203213196718 0.985170610991196 0.987598809687788 0.994279494531132 0.994279861936145 0.994688885030288 0.995991522938461 0.996462082348789 0.988664934243373 0.991304368586936 0.989857113029723 0.990673943785546 0.94569604385157 0.961488048858525 0.96373655272531 0.947730846856101 0.760499063555529 0.569754597777647 0.752958763769145 0.61666342450583 0.0364791677449007 0.0634402055217648 0.33614878914488 -0.225669361063426 -0.442575607504625 -0.212748194556093 -0.155155828962062 -0.650594406455166 -0.602309660022389 -0.609004191691676 -0.134176257188988 0.533662850677729 -0.153793984202482 0.201634099145399 -0.0610324844637117 -0.267846020118337 -0.312442452170315 -0.433106122757832 -0.478042004692281 -0.447678935204979 -0.58833604631129 -0.447803781538614 -0.185904874610501 -0.423549251046083 -0.552293518253137 0.175945511104648 0.506081976592296 -0.539653135378513 -0.652522156336609 0.276292409938732 -0.0523187785089309 0.173445688131734 0.703405636837854 0.903459779457864 0.799349595267305 0.327619260852133 0.875845841791906 0.963342722051179 -0.981141348587538 -0.970386296710895 -0.743127873800812 -0.473445435817235 -0.469460298958104 -0.434994465987026 -0.556056339606866 -0.402587382391409 -0.47346921556356 -0.489985773987813 -0.501771383058769 -0.322082840684567 -0.655086591606634 -0.686548110485428 -0.237269269613538 -0.274566732824196
-0.463598298020182 -0.0693796748375581 -0.328909034995205 0.112212284164731 -0.390587406791602 -0.215851067323737 -0.21515939115194 -0.28510218661182 -0.413409165130808 -0.457358401829549 -0.158569694227206 -0.338424225799387 -0.480372107811849 -0.346267177098526 -0.20283000630148 -0.181724957633092 -0.375286192379438 -0.254577964027698 -0.122504232723334 -0.335674316314168 -0.187174936480964 0.024159395256139 -0.256911696052781 -0.537986674453056 -0.0749212411780315 0.312511362307938 -0.270606104778425 -0.684271600006075 -0.386680243965156 0 -0.451319138420756 0.257580648337233 0.539211001643097 0.785410997739653 0.687857858968482 0.498171454840881 0.695358728818236 0.672651781630778 0.649665681680284 0.352173313319073 0.0153536483897322 -0.439649702250348 -0.394387676566143 -0.482616211140266 -0.749404202850093 -0.719795980956824 -0.74908051601285 -0.669735048962354 -0.824291749548014 -0.779184258980695 -0.756499925770686 -0.439621797777319 -0.804960654866246 -0.635312674392344 -0.631030547239995 -0.643592325641328 -0.741310440164207 -0.795891154639984 -0.688875935364923 -0.644132827409423 -0.790317952785613 -0.721971892762655 -0.644492114761851 -0.655708610043691 -0.79490466890386 -0.554191783243745 -0.581502291908701 -0.641019695389381 -0.521969632365991 -0.236583020317439 -0.439349030208239 -0.419952597369859 -0.207725384534952 -0.103295678007118 -0.538111738992785 -0.587372486414809 -0.477486500173205 -0.510653859938975 -0.4382783772358 -0.660642822877813 -0.591350079917402 -0.0755913172140616 -0.475152326539009 -0.464503305891578 -0.440807333021295 -0.283059078406375 -0.705940425830006 -0.757637864083165 -0.407262767013175 -0.280864044249379 -0.250995035965508 -0.118880506195932 0.200968559503958 -0.37514044634009 -0.569953227445285 -0.416209201101395 -0.374943407289468 -0.607752421184577 -0.641978334437862 -0.246052079411002 -0.299226844704206 -0.49759121740278 -0.235654750788066 -0.0431022267921087 0.0228990859918051 0.481124904668542 -0.843722314718021 0.759785166582461 0.944081842437496 0.969605818779035 0.92725054033405 0.981981130803012 0.953191244670072 0.842889109139752 0.835601341907462 0.875991183921745 0.872486767861584 0.894716270090802 0.866902376802733 0.915131170546179 0.910271584137129 0.881652431206459 0.839338123942734 0.84907299440329 0.822073728472204 0.349974655343569 0.285706108358564 0.555098338995779 0.134270712119733 -0.565061124814673 0.210339657628587 0.169594182572933 -0.343689063148475 -0.127272280097104 -0.708768341051164 -0.810535566986864 -0.720797505267006 -0.679996021681576 -0.765528520444379 -0.738046904893044 -0.669296347526017 -0.696113915686643 -0.576385263309194 -0.647158254032206 -0.51484644177344 -0.742852720139723 -0.756253710544144 -0.62137993754608 -0.585668364792853 -0.619871909359599 -0.488101571422664 -0.616459399621236 -0.572903231998277 -0.603086071761936 -0.51216489789516 -0.502483192904127 -0.377222686441364 -0.58516371548766 -0.280377336454933 -0.254341283029164 -0.36331912168927 -0.259410205685429 -0.664212534561093 -0.777242690525829 -0.816489663185281 -0.721686438739852 -0.877430827425977 -0.877331112453851 -0.842736822666657 -0.837482630445629 -0.908604282432779 -0.864832423457426 -0.794007054240539 -0.850392309444338 -0.931613666897968 -0.904340174644181 -0.379599376768403 0.108070225239281 -0.735582378444643 -0.530920970656751 0.870957385100469 0.651297981132065 -0.467522786816764 0.80333745700393 0.95187177027312 0.798698674780843 0.279706513322095 0.967377716852631 0.982162903245221 0.949472978146376 0.974530650933779 0.981576909422699 0.97738763337777 0.950707824622954 0.962682837085693 0.960243135554896 0.979110219988507 0.989253512180427 0.992132310908933 0.98729525811244 0.988884880704456 0.994798580741877 0.995716742942441 0.995666982457937 0.9967588126019 0.997007489199028 0.990640822330957 0.990541483440004 0.990554744945853 0.991975428339484 0.964693548294387 0.967539189099125 0.979499600361653 0.961875221700654 0.858942138399713 0.639797252064761 0.839239957172744 0.739601843150458 0.224027080689918 0.17402221714739 0.55077587289165 -0.0243093227106922 -0.415707584618584 -0.154005369089984 0.0165804423636949 -0.633190207479866 -0.573844930521275 -0.608317312402966 0.0522085093213882 0.608945475559981 -0.0801628973343147 0.379602336423489 0.140084636464202 -0.0677309621982821 -0.134147810438385 -0.267603015145769 -0.272403377879463 -0.228629159995309 -0.369558433732044 -0.158552468384751 0.0962285599602946 -0.227286352924403 -0.347004059952493 0.551333782624435 0.593943094623176 -0.464911937606359 -0.609200063967181 0.25628826166812 -0.164584696599574 0.318440479181268 0.736053603222182 0.928692293278611 0.790029180043812 0.273031549674759 0.872894485066825 0.959909442788077 -0.959897604030003 -0.932134129218929 -0.659702961412106 -0.334131632326308 -0.370742679369162 -0.350863704961089 -0.402151863133072 -0.160458618972152 -0.332867845175207 -0.460965827131016 -0.439598143768133 -0.102972817594877 -0.486356307006288 -0.487758264493306 -0.142890331501987 0.0498500400641544
-0.535612157519919 -0.134397550643099 -0.399208027484597 -0.00899488315408504 -0.468043911227442 -0.289996383877318 -0.324769584803 -0.415355407572358 -0.492274425509075 -0.49423614593241 -0.320813302012306 -0.469165419879648 -0.503243455722799 -0.407388745940912 -0.368858930201534 -0.309662985764068 -0.356738237701869 -0.396716271104445 -0.334124712280975 -0.426199567406607 -0.180923959851238 -0.108816393423159 -0.397087136198653 -0.503639687931613 -0.0641911973453088 0.208522252083043 -0.168228600793965 -0.358518172827829 0.469814707935947 -0.451319138420756 0 -0.235092205479744 0.262489473018702 0.656243758997678 0.589636891788506 0.356312682514133 0.584346651730886 0.451852693397925 0.259110284173652 0.127660067325573 -0.0775617563942742 -0.501277428913848 -0.331774566230911 -0.312823004096292 -0.648437064928448 -0.66078662572627 -0.654313343940614 -0.600625458920456 -0.75472635646626 -0.684261315332555 -0.6793663349041 -0.404714881958824 -0.742257333655515 -0.500418958989925 -0.545283461325114 -0.639578321860687 -0.741517484299804 -0.779845372173748 -0.666557217417225 -0.640843252408053 -0.784282214564659 -0.682125396495802 -0.63409996333672 -0.667868437873907 -0.754938525039363 -0.514575101190941 -0.504644457380991 -0.564352412090016 -0.521021841175905 -0.284069489343877 -0.429005892690906 -0.384431553946103 -0.226740563725152 -0.133481651037182 -0.493313802180005 -0.503597826570207 -0.391807799751049 -0.405996207129978 -0.316543092481248 -0.483775680125953 -0.408936733107568 -0.018181554370617 -0.29691033451382 -0.274613540241635 -0.212460004054127 0.00734734473996975 -0.374231325251866 -0.420750295239751 0.0592968729778866 0.238259384649285 0.25283804506285 0.345577359796429 0.627134596660945 0.202560310868014 -0.0239735647375372 0.19795787332048 0.195671156135673 -0.111472611320277 -0.165089684953658 0.152212105161754 0.0925882949648506 -0.122585328596118 0.0714343766996307 0.224249108748518 0.343151974143673 0.648570820557231 -0.777763529799333 0.773339774691602 0.904805528950546 0.951566751791257 0.897024014896515 0.973117841257159 0.94536779499588 0.835822152329279 0.83158644441777 0.85466044115743 0.834322923046574 0.8468062145994 0.799746228595774 0.788441982647084 0.788024750100201 0.727394441135446 0.650802059924892 0.690594200345846 0.693047943087799 0.364707924404974 0.184559791769741 0.405861399855154 0.258927402208686 -0.281906648615445 0.152520035045555 0.144346312019449 -0.0341143803287571 0.0530374291701315 -0.59876430546029 -0.746633989600479 -0.616725330843906 -0.57552751868464 -0.692778700553473 -0.654551933829233 -0.593364060035496 -0.620827112688352 -0.519606391894121 -0.595438879190554 -0.47197472592428 -0.712708275530451 -0.727789841205301 -0.56870698287792 -0.549616429779409 -0.570076061798534 -0.485567910180997 -0.578123242304286 -0.526118319839354 -0.571334667408242 -0.487311419788862 -0.480894513107506 -0.396841020041528 -0.544533702544851 -0.277126247261519 -0.218150815324702 -0.302209430946416 -0.182247352058289 -0.603126997771472 -0.708849328327259 -0.736233551959023 -0.653750747820354 -0.826732601631993 -0.824059833785593 -0.761465389601094 -0.752543792801321 -0.86578280875988 -0.804604273991266 -0.611079546214633 -0.738621891847516 -0.882816005131683 -0.807551770046844 -0.104694735572847 0.205533363582355 -0.563759210228175 -0.196318660988136 0.847114275745812 0.616364714658357 -0.187555695225377 0.831316922422668 0.946677901371753 0.771303819107697 0.514195639178414 0.968964804332966 0.97911091781946 0.940812459131281 0.977130154002302 0.987622583196935 0.980535548848663 0.960155614867322 0.972342834568118 0.970012236755539 0.976084165703757 0.988835066745874 0.992053330633936 0.986744517364936 0.988243045296224 0.993902246611279 0.995305287532104 0.994694115165966 0.996222712914075 0.996548959681589 0.9900106261961 0.990825630783709 0.992165903736066 0.993842867714522 0.982402373560921 0.970498704041154 0.979403133472641 0.968414352169554 0.831475057178674 0.619996545789828 0.821149684017026 0.750908182299993 0.247665955370051 0.190300600038223 0.526120580293753 0.069920339805856 -0.327178999052969 -0.0902025484916165 0.091379511156363 -0.510341798993778 -0.47885838392064 -0.494412640830436 0.0633209618889831 0.606364138003794 -0.0582189475187434 0.366271520964496 0.130760442842759 -0.0344997003093877 -0.136465514788874 -0.227697480847903 -0.230809991429921 -0.194536621483481 -0.366824839796838 -0.135591901233501 0.128399039299123 -0.218288946752904 -0.351399064163749 0.517523517000048 0.532036889413833 -0.530989165435082 -0.686845228404249 0.0697117059637554 -0.372731162152065 0.080464146800185 0.671279832799549 0.889878762978897 0.404229024459413 -0.406349789013137 0.741184837234889 0.921660305715889 -0.973774435358405 -0.924741031874844 -0.737853785125107 -0.502160290214969 -0.462359742211802 -0.588422004507702 -0.575165438058928 -0.33208470548525 -0.522978598151863 -0.619789563793098 -0.561566424766915 -0.294393885486818 -0.556162033208304 -0.568196570780289 -0.237673074749665 -0.00100353416907121
-0.467481423979349 -0.00781947710173438 -0.346834998745749 0.103227346910399 -0.330231641442361 -0.161822041575864 -0.199878357197792 -0.215005260415079 -0.271937049822108 -0.407488864415471 -0.222274846919919 -0.261259996408255 -0.341977822420886 -0.296234251403378 -0.206531205381142 -0.15560980481254 -0.277997352890132 -0.311229618947272 -0.205114019144109 -0.272738331139103 -0.0461727372439876 0.0532584782938761 -0.172489803494556 -0.341316913985561 0.118873122313585 0.30832630206386 -0.0710473059606877 -0.284255055908224 0.347867021710856 0.257580648337233 -0.235092205479744 0 -0.106052879925993 -0.508242371466992 -0.249497912634536 -0.313809998433811 0.120748295832064 -0.139317159324764 -0.365363599902678 -0.452911156129999 -0.35897410372234 -0.663148543766946 -0.55528137922724 -0.443390373781402 -0.608796062267369 -0.648056418689017 -0.686173032571631 -0.535645597176996 -0.737627522245743 -0.667550738167991 -0.62910067486193 -0.296128082827003 -0.732886441720176 -0.437801394300223 -0.417452449879275 -0.466033826765372 -0.653187014085946 -0.70634335103148 -0.525618233095958 -0.389155364313045 -0.659759049076991 -0.532673443194936 -0.406884197199124 -0.46595267928736 -0.635683551742915 -0.263768994594886 -0.264066035520248 -0.382192053893884 -0.28024267117976 0.00321377820960707 -0.298338120632304 -0.269361797308553 -0.100591247293143 0.112657053398343 -0.34672139946739 -0.406844081947519 -0.26876032011558 -0.211497155238795 -0.124750183435917 -0.417278045854662 -0.296002916780863 0.222829782690661 -0.126795726983977 -0.141210668972731 0.015144584532898 0.352003346052014 -0.426598050682179 -0.507879475317682 0.234955132326212 0.340580833674377 0.167551951866438 0.232699405838983 0.692449381409689 0.0124249126999419 -0.414970111593086 -0.0595371912433159 -0.00381219377806908 -0.527300320561733 -0.646860354674926 -0.107967491877007 -0.16953127504455 -0.488913789631877 -0.239881951808898 0.0371449857695493 0.102249002967402 0.491221187822089 -0.79967720959945 0.739045355800867 0.956273696189518 0.973099864014399 0.920795778178521 0.975300395903824 0.943685659243899 0.716529895463821 0.731711467289367 0.788813543147353 0.776383344089612 0.753784058167697 0.66837886510585 0.646914015327859 0.640357899600964 0.332592391656014 0.3264474111727 0.444085793454723 0.379660731663188 -0.00882388179467328 -0.07589711933314 0.0652119323404333 -0.182694183969414 -0.516928190492814 0.0893687122187436 -0.101124558938982 -0.167891834581873 0.234719799967066 -0.628255916202108 -0.810789516300478 -0.656448889867163 -0.593458574201791 -0.731308803170148 -0.697456661418424 -0.571631455131659 -0.61902074435396 -0.496926805984317 -0.571938391586813 -0.391193753179159 -0.708831436386537 -0.698179652798778 -0.520041355418827 -0.445912337863235 -0.478876388753883 -0.364381976860628 -0.496283368944918 -0.405877291013993 -0.498721024328055 -0.407370632294161 -0.360394860903938 -0.188456799244861 -0.403257897223282 -0.029559748787252 -0.00254367200474612 -0.0601890645508622 -0.00755189291732358 -0.540469435454395 -0.709767661539242 -0.759131275583026 -0.661892032839409 -0.838174454457397 -0.831465795700215 -0.760662647744622 -0.772867231981367 -0.881705088135295 -0.818722939179172 -0.645801523426149 -0.751393429279059 -0.886448229754783 -0.845205332745184 -0.248426044604718 0.176106176143552 -0.641238797892831 -0.385409324249184 0.827147224288617 0.6177740981873 -0.387849835279785 0.760917171864078 0.938423027065185 0.778002422711127 0.314529287786786 0.956076202727175 0.973407301011439 0.924222671001822 0.960363653528924 0.978038124817751 0.972575422267918 0.957150380320776 0.968342276028491 0.964899786432143 0.977481931110996 0.989249769759668 0.992435873715671 0.988157696884431 0.988582946854459 0.99388798142435 0.995861829392686 0.994598547505173 0.99499651978966 0.995584611395002 0.988545204652266 0.980855546028029 0.9847861760892 0.988613714489268 0.971397872170254 0.952806081449721 0.980234125199199 0.962036254416261 0.860599614934311 0.633217721837506 0.840794561413703 0.79277504834792 0.458954585447294 0.363021115760122 0.661745365019258 0.387141282691933 -0.162202272314751 0.0491207144219248 0.303333512127472 -0.329539774512384 -0.305468170830237 -0.366189146466961 0.311360376782376 0.677392971494029 0.0728303016575735 0.546103546516328 0.411906820497807 0.279172953506016 0.137095821523782 0.109211647567323 0.114299972900167 0.108535569898956 -0.0730111908932342 0.24251817580078 0.415558102705552 0.0523313767844716 -0.0207375934399359 0.709706621110027 0.642923760729633 -0.37881386798087 -0.539220167598466 0.152577511733842 -0.318623422172771 0.224714189760859 0.710379062344413 0.912107867551585 0.335153673383735 -0.405801593544968 0.746421638616773 0.923194760464555 -0.967575193307501 -0.892173490181263 -0.721813595062981 -0.516111344062824 -0.447829119847166 -0.588202077214645 -0.575950205705109 -0.353478167285376 -0.490049221549427 -0.593638478022969 -0.495250869974924 -0.221852918567113 -0.362974204672927 -0.273785699080124 -0.243805418829934 0.262362028256373
-0.46819558348179 0.00370973257451458 -0.357497988572053 0.0379523828952692 -0.364938575071194 -0.136970241161776 -0.207786605696807 -0.256003825200624 -0.241834242462354 -0.337409401408804 -0.247982158336959 -0.28181115008281 -0.239098744323336 -0.214929694871065 -0.220262219957435 -0.113559526611182 -0.161766969797477 -0.233219156147569 -0.232354695211947 -0.176438132920975 0.152548710791569 0.227088205943661 -0.00647848655588546 -0.0924089345158619 0.593811874324979 0.544192383035227 0.440657542452417 0.137448150030839 0.701437563697478 0.539211001643097 0.262489473018702 -0.106052879925993 0 -0.353255476794368 -0.181668402454851 -0.381339729417966 0.326800705386632 -0.0154123499464037 -0.266009407645017 -0.452464377529002 -0.331740179795301 -0.58747811495686 -0.48636891190078 -0.407943740217886 -0.541965908733275 -0.565018612091211 -0.612822028584598 -0.4608572199455 -0.680142515419103 -0.542290648742967 -0.522686671754737 -0.184750224907524 -0.642737752572425 -0.247469672823889 -0.269760654026456 -0.367158532382478 -0.57546447348159 -0.642457142506706 -0.418252700895022 -0.29139530594991 -0.595041943955009 -0.444496437370907 -0.322127979548478 -0.401263320032359 -0.52967372302142 -0.149413129741455 -0.110636508595782 -0.226632313650995 -0.086484416000611 0.201289201768453 -0.126896972151527 -0.075476800886987 0.100251511473224 0.346459733507331 -0.151636271919126 -0.261405010886557 -0.0666440873557776 0.000118714385780817 0.0374450925769007 -0.276839499519186 -0.121567294285309 0.318191376003841 -0.0217785971272481 -0.0228255522640711 0.154284448808809 0.389952826790437 -0.463001998903319 -0.528332184801103 0.182445193511275 0.208981876148181 -0.132940944327617 -0.0430862159915518 0.569227847557021 -0.430286457547323 -0.758992592416029 -0.535276992560718 -0.456053913941785 -0.77927673146339 -0.816988887967961 -0.395484567920117 -0.455002903202479 -0.684328804939898 -0.44573114933155 -0.195555117110238 -0.209120168037869 0.187719157158503 -0.878674453971387 0.675733605372305 0.949829865639452 0.971655950613822 0.929184603252283 0.986119686758311 0.965036702833666 0.75950728073746 0.709089381384798 0.760095494424686 0.766563541052544 0.73481882429034 0.701436755375761 0.657883103615182 0.627073424667775 0.14298405853694 0.288252967738996 0.458647720784034 0.259856489305654 -0.148122480695934 -0.0450158162448196 0.0567656874597368 -0.360087128074372 -0.575729450541663 0.15231660184524 -0.103275745461495 -0.247401601363604 0.317644444292278 -0.571965235607951 -0.801493357739867 -0.639159346079163 -0.551970733478882 -0.706956265945609 -0.666694612518286 -0.519293653735755 -0.592966164131481 -0.466319212380031 -0.549352480405695 -0.354085498370165 -0.717086780219839 -0.689008428302183 -0.484497757673829 -0.404657219237141 -0.428749522609615 -0.281310772323955 -0.433446353492526 -0.324252828981395 -0.430795751048821 -0.325521088641492 -0.249191531301826 -0.00367906545527338 -0.294599468721003 0.10005495866433 0.11321930095264 0.0452306416295621 0.0655752206886151 -0.514562253404573 -0.712039968381054 -0.763757667022232 -0.666947685011508 -0.852878808611573 -0.844626152829409 -0.774289934412211 -0.809073541943951 -0.8946349500205 -0.838761602150573 -0.709464344058242 -0.812702077458205 -0.913438221001388 -0.88135552822526 -0.356084058213541 0.0821924352092667 -0.745731775704053 -0.554730579485981 0.843734035234624 0.589918681635292 -0.579076627643551 0.769783888314527 0.951930818665378 0.758985736084473 0.0840777266471914 0.967265597514049 0.982318447275519 0.943967499908029 0.979182734202535 0.991069885374762 0.985250546198323 0.953382655851369 0.971915287552935 0.971533293134948 0.972489705460429 0.986748520935684 0.990851180259781 0.984749799692478 0.987759613149678 0.993834940728127 0.995376864401707 0.994669456183027 0.996361393241651 0.997032366611525 0.991434319704406 0.988897474773908 0.990619801873927 0.993801124792268 0.98113061900475 0.967472799246958 0.985484594768521 0.971577892434031 0.867747283520637 0.637575949574947 0.854256610739661 0.793970418407053 0.425853389334841 0.319733270468304 0.638690428670588 0.317288438969432 -0.214391643606153 -0.00146366004180474 0.252939219617104 -0.396651824642255 -0.359221073492514 -0.437558505003127 0.266513554662651 0.677752457953886 0.0522049937742524 0.511861270054126 0.357697590055742 0.248829683561931 0.134306746733459 0.094577226172893 0.0614813747848143 0.0832160635353754 -0.0686239547102943 0.215951354962759 0.38213243550254 0.0413433536146034 -0.0298875508951234 0.690739437285232 0.628921107796586 -0.36452502477175 -0.579253488879663 0.101327071371232 -0.346622999474303 0.158822943999728 0.660843345640705 0.90105012775139 -0.0606681386065364 -0.672193452218025 0.591183605986035 0.860933962375273 -0.983069565485201 -0.951071896012143 -0.833968970559791 -0.674605991297595 -0.440811790024552 -0.712071466163365 -0.720151055914126 -0.357323306448319 -0.361053966097082 -0.629413592408215 -0.571345274693209 -0.0400720066119195 -0.205854911311106 0.0522985827484713 -0.103178701129925 0.31601019540711
-0.260483411270216 0.268743644447103 -0.0134821725561194 0.242444938726253 -0.0095305549772772 0.276351725856628 0.24381169524341 0.0683793531036811 0.153034054327795 0.235765700104186 0.266400872794945 0.137619710745045 0.364556256152965 0.435057212002109 0.312790718974461 0.336616341315361 0.507480128155156 0.479107158158485 0.23222571289001 0.360021737927899 0.694403915303111 0.699875069860244 0.562958289122057 0.646548409597884 0.838219450882251 0.7809826374385 0.751814601029921 0.804951227327482 0.889712955421818 0.785410997739653 0.656243758997678 -0.508242371466992 -0.353255476794368 0 0.0178617070936248 -0.552447316689741 0.0677158754619201 -0.00648771819043818 -0.0413567642542289 -0.142377252685317 -0.0278332668945768 -0.34642183308988 -0.151559699664948 -0.0431706819482654 -0.23194810647234 -0.233959649382756 -0.388328342795282 -0.138475042669414 -0.204991373610573 -0.00447473991814099 -0.11979650960282 0.21665682753232 -0.135216537244403 0.347114660941648 0.170981290083415 0.0370879745716777 -0.160756435332292 -0.327323405706064 -0.0508776671059532 0.117219560180881 -0.303347706514845 -0.147308826479173 -0.0844829941475167 -0.0989006899339487 -0.208317116548961 0.1056459469438 0.205146630600436 0.131050239991153 0.267433514527046 0.509002211788373 0.165285549430682 0.278567028405197 0.377414068858144 0.566996272617451 0.196883770238327 0.0908933124420235 0.312144612893701 0.371410994690325 0.310747605426809 0.112687718787854 0.305220623176281 0.504141827860913 0.224448954243807 0.267636569790123 0.392808566490607 0.492591213403186 -0.09058648783934 -0.0960749755998894 0.502822006451988 0.485697698569728 0.365996060147275 0.477583680134237 0.696214967701742 0.0546336833476302 -0.341574083833782 -0.0282035991504789 -0.0909715505691473 -0.558265288535135 -0.586103544259451 -0.161981142848761 -0.290217518694246 -0.556105825269522 -0.302671801181221 -0.101517545097635 -0.0916112085772125 0.198173326848499 -0.881496772237894 0.532953979583574 0.740952601123455 0.799002307304936 0.792343788905811 0.974137563139881 0.919878100446741 0.683750608031205 0.655065016003992 0.778245585383303 0.794113727621803 0.779803156846378 0.753508409791089 0.792723982872924 0.797709608217749 0.628131056495326 0.665936185920873 0.704156373750763 0.698318778775516 0.401288916653913 0.335577324427577 0.423299998669624 0.273620649751693 -0.055350446572456 0.403280642081136 0.291581361443939 0.237982473089219 0.536683561519067 -0.356025750228457 -0.744192827376763 -0.528424418076467 -0.361012275640656 -0.569365048079989 -0.555753415648465 -0.371115140737442 -0.512578225418253 -0.406923752081761 -0.47053097698775 -0.339954172822885 -0.593548991455336 -0.616856918708463 -0.357198578650384 -0.3506126537447 -0.326984106287813 -0.143702958094763 -0.243855887553102 -0.114527917293443 -0.245840217999209 -0.130276050768014 -0.0098734045841518 0.250015072737255 -0.0453015874156013 0.292963841168424 0.313925217916319 0.212161273207945 0.225675514214744 -0.401256032340985 -0.611324503329457 -0.713073611893309 -0.665859631068855 -0.830564340702888 -0.803761327471633 -0.746012918962223 -0.757169005755187 -0.882309067504332 -0.779231860279439 -0.582324035096537 -0.764627688192334 -0.88662192417451 -0.77952486718959 -0.0597744082870647 0.099729175736257 -0.699252044273868 -0.329396133298191 0.848404813370042 0.439518037199417 -0.492252038718232 0.774361455726969 0.922393078583605 0.558103618784859 0.146175026704848 0.953902765628008 0.966038091551766 0.897813994898234 0.9720370851711 0.988742110037998 0.976930487331439 0.949873987657271 0.971513587696195 0.970653919627075 0.962862434015805 0.98442732817012 0.989168762645477 0.980885114518155 0.985571451140649 0.992665099736714 0.99297579432783 0.990302353268565 0.994933166437031 0.995143824815154 0.986398694916528 0.98763409476306 0.991307576435307 0.991504205078506 0.972223944459259 0.958175669475236 0.973039349870841 0.960443446334079 0.828382189198142 0.654340434623503 0.816420936420614 0.7474270381554 0.374306448089707 0.293728749657896 0.5729638768199 0.215975532449247 -0.211048561781991 -0.0440200286177015 0.149812825208241 -0.394616209166558 -0.380677743594943 -0.478694287701889 0.120725303251644 0.651724112455623 0.0272792880435616 0.408037572154674 0.217453699512655 0.201446475086859 0.150670682356595 0.115403317756107 0.0533307456008874 0.0873842703393919 0.00604313487451835 0.226082680546352 0.351979720564061 0.105155541852167 0.0682944378813531 0.598995883881818 0.584878573496874 -0.149917198082624 -0.398488604939374 0.124084055148113 -0.163850453037413 0.293753007648345 0.558182246567806 0.788527703291649 -0.345206540604189 -0.737424237597133 -0.0354678065140963 -0.0609836212153078 -0.98117156926943 -0.958409289311448 -0.883794847175152 -0.769534020308386 -0.55779430489439 -0.69790354886253 -0.70175533945798 -0.279443440080323 0.0713219827676221 -0.234887334602193 -0.173448564911744 0.581939451304355 0.539507992454544 0.652119740344836 0.392116874872399 0.399990630078593
-0.408584795713785 0.180346096083235 -0.254354447275127 -0.0035813960963084 -0.257596799237006 0.15720962692575 -0.0565494359120357 -0.239451260144011 0.0172461296328125 0.0997543990719828 -0.148040694132152 -0.1518560576007 0.304476501290417 0.280755586376372 -0.0676106165140191 0.223338894516766 0.549096779598154 0.263067673359348 -0.142954471304996 0.34962690994554 0.778670528488897 0.644119220628433 0.529802584202305 0.807456331337436 0.865184606152088 0.720321679344151 0.789256316641088 0.784095989757474 0.874602128306583 0.687857858968482 0.589636891788506 -0.249497912634536 -0.181668402454851 0.0178617070936248 0 -0.250411896563303 0.141542637184567 -0.231081706682841 0.233731791585816 0.258341623144822 0.271468955471663 -0.00433784272884913 0.439899983812331 0.487670925806645 0.172349139606422 0.239456173006156 0.0985174197861172 0.127705587504896 0.0714112701140764 0.476982179221878 0.211494769405798 0.390944931179674 0.132972392698819 0.645215310803221 0.546621950771077 0.342737077960803 0.0414665362320394 -0.0199170943629413 0.309488775955974 0.428178596053992 -0.0845078252020229 0.24149137092992 0.165997187971709 0.0808123383602589 0.0573438928615154 0.46048250385254 0.554908304861861 0.553055608151541 0.602636820067435 0.791420584805831 0.609779043314621 0.64533309098527 0.687988548369633 0.816284709492013 0.667208891312536 0.582003516938344 0.766275591098078 0.722650712839851 0.666082583914968 0.641225207821123 0.747277194782429 0.76421581629604 0.638150744408726 0.708014374476333 0.724339463947397 0.737064754566492 0.490672110405145 0.543581788426967 0.758199404699866 0.716909293803237 0.65199800608713 0.701830522165381 0.800704749708055 0.441680540157808 0.226675131629651 0.44051058748956 0.281239889901619 -0.223833461151284 -0.341994349022621 0.0122480045986144 -0.145530482969722 -0.484047066816652 -0.282386734586215 -0.0774018721049506 -0.0745692029955045 0.155282244530127 -0.906656397505308 0.511378491241731 0.752959648733123 0.741171340156315 0.84648739691588 0.986832295289825 0.954688561698138 0.723830919854438 0.673275715229633 0.753336278601522 0.768120799114422 0.725808220633911 0.763639711703397 0.760583298551864 0.753442731607805 0.670322805043213 0.775617249363916 0.775763698468012 0.741464862257258 0.643664195193687 0.643668743047985 0.65434032034952 0.576407603045333 0.603530858528969 0.728553344432241 0.586729683089748 0.670804983676591 0.827410412790419 0.438142671918567 -0.340194191623182 0.107630476378739 0.29306322534515 0.0983651319009966 0.0676023881881496 0.268616783988717 0.0522292627141969 -0.0310764259794513 -0.104572388262313 -0.0345436765167046 -0.373171671771481 -0.380641829604924 -0.0198609039937799 -0.0460951900336514 0.0466915343903392 0.296885868408165 0.182386006589508 0.291591844122735 0.222538511968141 0.295235919221462 0.400117206608302 0.672102139212064 0.408048148771225 0.544613366027378 0.539468184764112 0.537382407090503 0.509022418451848 -0.0606251974989238 -0.326010541031913 -0.480167432596122 -0.469729379156338 -0.640759598705558 -0.586122542754308 -0.499297152350917 -0.55140230431462 -0.760051623274036 -0.562937560607099 -0.229277592017413 -0.536635321871891 -0.764022490896491 -0.522230053673577 0.218403944037333 0.316637215490817 -0.43274526021078 0.0402448125930221 0.811635591883401 0.467000961464482 -0.217078461285223 0.750411355955709 0.890378870573917 0.536789165635798 0.262989642789643 0.939253333466019 0.949542546606867 0.875451852173632 0.971717963158302 0.988751735180187 0.978996742841138 0.958773912742184 0.976167795570716 0.974717057770663 0.953722251867717 0.98398744364349 0.98963752477942 0.981361301484165 0.984671339770415 0.991735854979823 0.993399971836746 0.988762803935166 0.99285179140275 0.994244857602858 0.984381269254895 0.973734002319309 0.983343963557636 0.985368459412227 0.967340275034466 0.923996123046707 0.959698818671836 0.942662209494517 0.777938837482299 0.579838477341814 0.779711800531531 0.7256990700401 0.450352183144179 0.452208858715833 0.649010151848264 0.413834157997995 0.0663341461162846 0.1822112262163 0.370611565348129 -0.0249979952951475 4.94007159941647e-05 -0.201716949156362 0.347290325938128 0.734956682777831 0.143582031717317 0.513635181728323 0.334054709360392 0.339576250556986 0.286045753189188 0.275862228407574 0.211638122307416 0.29058918745475 0.198402432302792 0.364123124789403 0.454461953410697 0.286116513198366 0.193259910977315 0.636915482046401 0.599183068624916 -0.1520429828546 -0.535392226908018 -0.0712989210373965 -0.371888584936512 0.00288864471977388 0.313652816011528 0.675645092484359 -0.851683616041141 -0.930435289561271 -0.649903750641935 -0.830195885103177 -0.986610964768437 -0.967626151145267 -0.910763933891773 -0.829550546894464 -0.640244404484952 -0.800189501463218 -0.81842640056827 -0.620626885158786 -0.462757399728327 -0.688713638050124 -0.675790512476232 -0.153909024169979 0.0820154070549458 0.228427331041136 -0.0752576488194385 0.230910113150951
-0.389437247864437 0.134639267493309 -0.217104259496369 -0.0917541654320716 -0.230013637822672 0.0938330742791033 -0.0812342411135275 -0.244368727247795 -0.00488200072588102 0.121365874651355 -0.18328061721924 -0.188203318253296 0.239754762995155 0.234702903472414 -0.121209954390724 0.127235111977649 0.4544538576414 0.211603824594306 -0.229718876425956 0.226532773456435 0.641815634051129 0.528373318143121 0.420808944789399 0.758764023591691 0.791662569136569 0.624781279427367 0.729798964690413 0.702608120765112 0.819048140265581 0.498171454840881 0.356312682514133 -0.313809998433811 -0.381339729417966 -0.552447316689741 -0.250411896563303 0 -0.489157117799632 -0.765905098631368 -0.198921049738261 0.269788361159293 0.281634804177494 -0.0200186177430257 0.435418648186981 0.443401317143376 0.23520438130762 0.293220429694957 0.165473777221968 0.14374307247661 0.151068586041496 0.533654994094695 0.265581175890795 0.386406192236233 0.264829589561748 0.654014874375327 0.537714244065324 0.383532937370907 0.195546876731661 0.170477357632989 0.399536606496799 0.423838048757724 0.107822153609692 0.334059684627414 0.200704193988419 0.142219948748286 0.17098551068461 0.521511892290041 0.570749152489709 0.587764118785189 0.615058708305988 0.761257835128535 0.645554824863945 0.634627182641549 0.686602017365771 0.802091472024073 0.687967098465725 0.603057960006876 0.770680130276497 0.715606511091103 0.667217572105059 0.671455506837433 0.770886237834898 0.73701310029578 0.623530353335355 0.714189169194964 0.709891765181258 0.720851528207225 0.546090519466656 0.618970569194529 0.764457239197918 0.733227511231296 0.685788654900125 0.733995201340305 0.80183771419188 0.563394362195584 0.447819856330578 0.621534523014711 0.491670530252358 0.0750763198977859 -0.014877785331647 0.28034669349027 0.0585285525655379 -0.401366645725824 -0.164236718205638 0.0414981236796253 -0.0095471199314924 0.0316877828026226 -0.933569432858417 0.236117828181535 -0.237113101784603 -0.605536881394901 0.564423893382514 0.992601832049972 0.964135203106821 0.721618591606598 0.445351142972081 0.537214133450403 0.694859800337894 0.657891270633502 0.755262582523528 0.671871156681853 0.70911946000785 0.622101814051698 0.718615634506865 0.719192915718371 0.674463103353914 0.63801890577963 0.620981514701434 0.60498357668505 0.578956421442917 0.665868006600009 0.740871910010799 0.554596125806541 0.711540246123447 0.833203946644802 0.566076916897325 -0.163837878503378 0.258332327825243 0.392945109243293 0.267089090570146 0.245775522891232 0.391500093713833 0.175852533286791 0.0399387773238853 -0.0180850300592669 0.0136748308153341 -0.290421056728556 -0.275246393926909 0.0421793931097848 0.0156868095606509 0.104488644501266 0.349692868203521 0.247751753300945 0.342331048262477 0.318816071632181 0.372277191202649 0.43600389563616 0.665175139216412 0.453575088898896 0.565694118539968 0.566517891830293 0.547455561546443 0.531944036902214 0.0215102349692381 -0.208049253441759 -0.369536816893805 -0.387424676015667 -0.554047790738926 -0.47643530614901 -0.375097562299437 -0.44454131432196 -0.667687542768956 -0.421591133390798 -0.0703442742247594 -0.399999230474809 -0.650441157828805 -0.256781856146351 0.331512086932778 0.339363091613445 -0.26469847885274 0.252235486304861 0.772075664445367 0.429756972567812 -0.0573594742718921 0.752229267954286 0.85459284670901 0.503252253159993 0.402637437492709 0.933499478333526 0.927639600952197 0.838453788780705 0.969864574219267 0.986372139994956 0.974758022444945 0.966271946673245 0.979244592079258 0.977750781240691 0.930387428530155 0.978853048553232 0.987884745594742 0.977216372666888 0.979779172666846 0.990444249358076 0.992497934994946 0.984793143094667 0.990160369931556 0.992908182849242 0.978632146390979 0.957985133748038 0.974487259459982 0.977040773322814 0.944158981994902 0.877245012859708 0.935234536634347 0.913857322955787 0.696226305779765 0.498379862443555 0.699591100430927 0.651092813115499 0.379751160980122 0.37908849916434 0.529648644555651 0.339509420123676 0.104836827571819 0.195561058226288 0.333040807802477 0.0500544960804801 0.078523059051211 -0.137797692390003 0.293956159495797 0.712808185973819 0.152712465155577 0.475603909074467 0.289853527617004 0.319206424362054 0.263411634486367 0.242580408015872 0.181406731162064 0.25615003710766 0.190926322210084 0.317828835733959 0.384658621660944 0.254831197130134 0.162792344979269 0.54485461032865 0.529266330456288 -0.122106615601478 -0.456468895568262 -0.165015354969405 -0.376007932605407 -0.133667762140646 0.027494960694602 0.158324996004027 -0.875050171904423 -0.937152002219118 -0.789497975855484 -0.925818185738133 -0.989427879706503 -0.974634570012259 -0.924070240016624 -0.853340996132029 -0.60781014021972 -0.814755473814564 -0.847787023986346 -0.669740402339989 -0.469916339954656 -0.703964268174793 -0.692818245430934 -0.152809285952776 0.0814369989366957 0.306333605113714 -0.0439910061787158 0.211084258710688
-0.348464176629078 0.131913834214086 -0.206780135368173 -0.0927240411600928 -0.177875511704477 0.0892895168856596 -0.0693882284625088 -0.187337341869444 0.0505682958714025 0.109236626597678 -0.16026933521436 -0.103101216697591 0.238073696405096 0.173138988441468 -0.0599500911538254 0.152810286465322 0.376220667614657 0.166442486348812 -0.126004287645518 0.289871360031127 0.581639061508694 0.461596937962879 0.470254601116069 0.728031708583962 0.722771471787494 0.588105476618313 0.701760424353128 0.665536432097054 0.774236678720839 0.695358728818236 0.584346651730886 0.120748295832064 0.326800705386632 0.0677158754619201 0.141542637184567 -0.489157117799632 0 -0.435747555791928 -0.162255956502143 0.179766714817671 0.441651298730666 0.28029211541356 0.506067795292715 0.508979189192996 0.412689451478836 0.433124503306811 0.320324937028568 0.285072910926812 0.249316057994342 0.600572749086451 0.363736559267953 0.425661052154127 0.307913671283474 0.648884200555363 0.551461943392211 0.432502454660337 0.272502725778011 0.289882026986524 0.461801792971309 0.46845714133327 0.252392771521265 0.47717214911461 0.341326095512348 0.246192553485433 0.278906606491912 0.587743414776477 0.616576625682428 0.645643505596139 0.670774445311526 0.831692115420481 0.733063124964598 0.6852164176158 0.740602900965916 0.83308991762576 0.755979275788337 0.650847301357474 0.817463943030611 0.754657744154554 0.729218847858451 0.742501560861261 0.792558082858393 0.786947636447771 0.694005157284231 0.784936400651708 0.759559339126944 0.758186307375171 0.561069670364505 0.628321062467561 0.783160256384896 0.735389832180135 0.625489171702607 0.683288981832975 0.787185516234641 0.370033234799214 -0.110872095672121 0.307624341378681 0.0815236337294261 -0.73022479342459 -0.865492192592037 -0.412139583980171 -0.61621967797288 -0.89771066883351 -0.770286971492982 -0.533770021784748 -0.72436029360869 -0.714745863742198 -0.971963715834482 0.216354632642925 0.831300509354214 0.655054496522702 0.886990903818534 0.9924897354077 0.965081546479115 0.0666518528694955 -0.425384064171241 0.188046286174257 0.184828109031052 -0.399802612978656 -0.126738072913387 0.24483243896155 -0.182139800151724 -0.363482261220474 0.62610084975663 0.592638184171746 0.14106292661602 0.374962106896171 0.633052081945245 0.353861892782325 0.0926890551021171 0.579297270138543 0.805753640180552 0.399693091967432 0.5555348813833 0.870923992144219 0.587094277152317 -0.127644220010672 0.348705551589874 0.464953125351331 0.307124011470813 0.276197434799068 0.463978571418516 0.27504055800206 0.115477051486151 0.0431564382951635 0.0808052180200185 -0.264983949613789 -0.236210941534351 0.111714137571523 0.106040575294993 0.213188359260507 0.47449291590344 0.359181742516685 0.427522451069797 0.427647565487746 0.471495379121294 0.518570624416041 0.767020790057115 0.544333213590892 0.601005153442828 0.594360589516463 0.604619468181575 0.564981137474874 0.112149040312155 -0.151301584658654 -0.369452987893641 -0.402384714412035 -0.592766140470208 -0.506970932101034 -0.392236298413273 -0.489906903925821 -0.741437977442956 -0.515365688237468 -0.145531454683559 -0.504971588169403 -0.768827989663099 -0.511823981750495 0.192828817603997 0.311443712260165 -0.485864899537472 -0.0640404097262404 0.785075883053256 0.459803482616797 -0.342308947681854 0.731039143056101 0.891612725908441 0.555672653990357 0.130599754624419 0.952593951886407 0.962275135485712 0.89233461259651 0.978322471035548 0.991066903654415 0.982987767614575 0.946699358653433 0.969899389179354 0.968581043821916 0.936163777355272 0.978644765961183 0.988331189644748 0.977071524169831 0.980657178685536 0.991718001424798 0.992977716334395 0.985087359020828 0.991390401198837 0.993184956954547 0.977130697673975 0.954851305182335 0.975684121870166 0.976118398344479 0.936695237718953 0.861777853452643 0.937474791126354 0.912175423965228 0.70143981095803 0.512104662278052 0.722441749718479 0.679072366989733 0.439195563619715 0.460228738227906 0.617586064125525 0.437463548113936 0.176489066350975 0.258558319253092 0.437278775962639 0.132699413010703 0.16308765044806 -0.0715655495349852 0.414773680192299 0.757336921700458 0.20728037758948 0.5371677313681 0.367049354130131 0.387630470182293 0.342260093841242 0.34192107646912 0.291798502570858 0.362943121896566 0.304236768285506 0.412135062176128 0.461835861197104 0.348433067471329 0.273718844713624 0.574933646345734 0.537485317865668 -0.0109161782034742 -0.331901249157364 -0.0721754821469056 -0.270422091514137 -0.0402117298988337 0.0915494897417386 0.211864714988223 -0.802636617752997 -0.89712918913658 -0.75550832937328 -0.923078097304042 -0.98544261583238 -0.960348170014077 -0.896127095414019 -0.822581284948527 -0.308430059817126 -0.664509849586188 -0.769628547463704 -0.534345685644026 -0.0616941436997597 -0.554898877980432 -0.568835204681046 0.094053644625244 0.22654352333941 0.453146215030507 0.0973043889677654 0.291453232304379
-0.310818284477515 0.304773633095697 -0.10022098303992 0.123045610222579 -0.0784168218319936 0.289175733407124 0.131337276036407 -0.0552411861295984 0.175969251912881 0.269657053373812 0.0604256654954951 0.0529563635817315 0.388487938848374 0.402824541247004 0.169833387142851 0.351777131233758 0.555070362872151 0.41162516791384 0.0632416610859256 0.459690847249173 0.689387316270877 0.624139671632008 0.610218882374156 0.773839075419311 0.74137091356722 0.624844007780075 0.679196052978886 0.619986580624094 0.718026626087821 0.672651781630778 0.451852693397925 -0.139317159324764 -0.0154123499464037 -0.00648771819043818 -0.231081706682841 -0.765905098631368 -0.435747555791928 0 -0.509248442086076 -0.5815356086169 0.369453221303241 0.108924504846949 0.355439213030108 0.44797523396211 0.432140381333265 0.360919533228117 0.145345567439289 0.318676666605605 0.218845658215803 0.578961893123616 0.306941090830758 0.446571387164489 0.249583057409497 0.645213139627546 0.586081070239597 0.478962797647923 0.228269112942366 0.136051701320843 0.4469038720307 0.568743227466006 0.12804472525692 0.407344192131104 0.321698238992885 0.247357516503344 0.212113121419358 0.593701713086485 0.635402226715935 0.615792081026099 0.668778980074239 0.81317390702736 0.707091780247885 0.669201269070003 0.727045535230286 0.836110855533065 0.698215469791118 0.57370644490014 0.804142068110162 0.769452096242454 0.742911607759696 0.691062753384624 0.780177040615152 0.815943148023235 0.702417917976652 0.780575200573215 0.756927060552859 0.74537601123111 0.291374565603225 0.305696173178018 0.735951384408262 0.614608604076885 0.297671586174877 0.412622521981773 0.700048919557676 -0.423265350208194 -0.81225408328396 -0.711074680305739 -0.699194364491728 -0.907150257753842 -0.929956008286721 -0.706681012678343 -0.788968331149891 -0.916532971619764 -0.791174207339938 -0.63138651511014 -0.766500884801434 -0.643822823081133 -0.964031914813707 0.361683375408909 0.901880027741689 0.867666993765623 0.907458613495569 0.994882748244487 0.97348271615617 0.391297269861584 -0.155844645649288 0.555905837489867 0.667161714209209 0.0849982900272071 0.112203296229755 0.635493663297594 0.323509894033112 -0.426828790344497 0.478770710373978 0.642087926007685 0.109720732534033 -0.0156266654664478 0.532997272648578 0.350721375780234 -0.254289968242226 0.0576884835371789 0.70586986716026 0.285216193167588 0.252600255598395 0.846927092920464 0.21929760709728 -0.508308729635938 -0.0734321878348064 0.192231551527735 -0.0449711437274867 -0.112020239774022 0.153627380783597 -0.0865685715110634 -0.115087225186299 -0.194174644715525 -0.0816934529320056 -0.441949599526032 -0.493425777390626 -0.0701631553707049 -0.0627163209118676 0.0389576861742448 0.298766511616586 0.193863153688684 0.328506995032956 0.202604813508009 0.270594660899303 0.429547225764473 0.714782133371304 0.479823770044135 0.607416199291617 0.598214650808847 0.590040724323463 0.541941521152582 -0.132675199794684 -0.479278453476462 -0.647214705327963 -0.595061587090258 -0.786617911805639 -0.751085214647901 -0.680628807454983 -0.730231277461892 -0.889494170967597 -0.765903783339162 -0.54801695635713 -0.772909540780338 -0.906487898410162 -0.826350612354394 -0.0878696507818916 0.149978290483809 -0.769715468498026 -0.541310720858198 0.869862389438673 0.486962945580311 -0.700629843469511 0.772188923297472 0.943531467498422 0.606585734200362 -0.282896265277562 0.969849025580976 0.980079458284731 0.907763331524689 0.959619238737085 0.98143626862819 0.966609824721389 0.907602584799049 0.951867966043658 0.952699096953961 0.961603524414183 0.984396330504389 0.990869298315196 0.981400989484059 0.986754302147224 0.994778074558736 0.995351938798834 0.992282122390181 0.996831536619294 0.997203325327679 0.990125619428322 0.989280507827211 0.992486396062441 0.99311945443578 0.984845714458426 0.964329078555174 0.979387401220648 0.962673367705797 0.835537225821984 0.662196337289837 0.827512883044103 0.771491536856071 0.51154660130898 0.48932732675135 0.683385895351732 0.433562356915591 -0.0109931883474205 0.0998772392908557 0.324036064407272 -0.155552669497845 -0.165793960053078 -0.350223760861066 0.344366232759687 0.737161776998776 0.132077425574981 0.531639642414169 0.362120767174826 0.373305603384851 0.330168660165412 0.335311968871105 0.268553425247354 0.347306012935519 0.276642049394445 0.440663369459471 0.503908564457768 0.363191827449283 0.298154234165044 0.707244068323187 0.685074007239332 -0.00559676099465627 -0.402178745316552 0.10463295360712 -0.229384767011114 0.195680305264254 0.483468082206313 0.704717088326232 -0.850824458886318 -0.93197984808068 -0.682728527791178 -0.899611242110797 -0.987804471020702 -0.970434190561645 -0.881708372419261 -0.797670527990542 -0.320446094120775 -0.645014496827434 -0.731030384017079 -0.45729931763907 0.205788997421651 -0.398893108192804 -0.414279707526734 0.37595926727923 0.376357317541737 0.621275019645469 0.341129689500444 0.367054134693702
-0.310298569750264 0.370029478733223 0.0214383362099437 0.219755191404145 -0.0772094259432034 0.41041500547869 0.302294781994789 -0.0313883581039152 0.220204928785985 0.502544164763999 0.280005403775354 0.0844207122910789 0.566936919019273 0.62411227209838 0.324932974584866 0.462680923603821 0.750927872050648 0.681827464922542 0.191348657139503 0.546336755740897 0.810511450361254 0.782605908333335 0.725359931605697 0.84002027814573 0.847686662023971 0.750070780161223 0.756199091368817 0.710973743301247 0.764372009281108 0.649665681680284 0.259110284173652 -0.365363599902678 -0.266009407645017 -0.0413567642542289 0.233731791585816 -0.198921049738261 -0.162255956502143 -0.509248442086076 0 -0.545376871105217 0.394626676260379 0.215605319683302 0.389055087937463 0.404266137535196 0.332697879390306 0.439749422324303 0.0254270938333554 0.198867177350398 0.381156700826752 0.693725067132489 0.369191531717882 0.55823731738219 0.498486937582716 0.785015439230338 0.733652222596694 0.60352422478435 0.385566397171001 0.215420675747084 0.495833261802556 0.540004829665621 0.164877533871159 0.322394899073406 0.188090667986564 0.203825962457112 0.197161244630046 0.496172059525727 0.626336199398244 0.645204528811256 0.681863914855768 0.788824063528921 0.704283773543959 0.742341508889408 0.789328112182391 0.891097629805436 0.789668427577421 0.657218009014475 0.85539839145167 0.813733017332952 0.786711531646306 0.749907918934495 0.85523360831352 0.849191576302565 0.725194546647247 0.766820137017739 0.802605448655402 0.81166078851611 0.240628769932127 0.38777905129911 0.801934316678462 0.691930794554088 0.479921577739903 0.661018973610153 0.792274199724154 -0.300036849722256 -0.786319437257792 -0.563491398979932 -0.636710667692759 -0.909616702830536 -0.891736451547432 -0.548466751919676 -0.754921742410209 -0.899798463693243 -0.670292139602494 -0.519546454867423 -0.712102963835071 -0.591097474699119 -0.961698063212717 0.0933161426080267 -0.420714866878046 -0.643842528087754 0.588943844136562 0.991235527509193 0.917148499134914 0.455844707090612 -0.120778111021746 0.349718503047175 0.613404661181965 0.44403136458919 0.276522586057975 0.752301583924208 0.644223543783216 -0.0455282276304099 0.557014770151245 0.695225751771876 0.436017430430723 0.271896754355695 0.531284569152259 0.506267545337075 0.125504821840945 0.240509082369716 0.705221304002151 0.418129359880588 0.408207265615663 0.861542526387835 0.141414476052774 -0.612147708760481 -0.322393133047426 0.0265626938395142 -0.137314656165716 -0.234775655526414 -0.0214610423367284 -0.331961732844135 -0.297306551599198 -0.349762452915125 -0.245429773134547 -0.631593028596109 -0.666920729167452 -0.277468440026714 -0.238110750773175 -0.178416288405473 0.133576917417461 0.019332771433425 0.219394662094207 0.0689586959612078 0.179628783773683 0.371483436366295 0.656887184859391 0.377850227763949 0.582017045270592 0.571765667586599 0.541060450860187 0.49134553625642 -0.35278320786285 -0.658674814375649 -0.773890764331924 -0.73333190055476 -0.876014606993154 -0.85515894894398 -0.784073366318131 -0.845406283610997 -0.926808492041426 -0.834287651899211 -0.692403441053901 -0.861225061041651 -0.928060057286509 -0.828073894123629 0.0521900904747453 -0.0125054276539957 -0.812747944556879 -0.435417346973201 0.894880350851626 0.323611591858641 -0.749175564426899 0.862547309723965 0.947705232735347 0.506171430947543 -0.114834279484936 0.979519996285242 0.979684670730761 0.912482129018717 0.975044302868132 0.981357158709433 0.971928586405953 0.928382982447453 0.958105202631074 0.955503650136031 0.954433173758535 0.984377639619504 0.991680850139108 0.981823622715282 0.986926897311746 0.995598153217166 0.996150075372875 0.992604602305614 0.997634722734385 0.998502200318555 0.992759518725384 0.993097359698743 0.993940149779794 0.993872185349678 0.980797200507701 0.977316802072514 0.981277347049846 0.968652584451491 0.838234245608642 0.629145460973992 0.822121532454289 0.742748856396981 0.322674101809537 0.203954896423805 0.424265115629011 0.0618515583533627 -0.27928465003767 -0.126684693452395 0.0284651053360729 -0.45901492066769 -0.428301129737738 -0.566263350054454 -0.00915443718083901 0.66861327547818 0.00837922981490829 0.364069760325507 0.146188961279403 0.204558152165267 0.17601087777953 0.131410857395725 -0.0167569275741182 0.0731779301030985 0.0485656959662796 0.257617347790745 0.334005025745344 0.131058080471977 0.0817983452822293 0.659577797460697 0.666288451637632 -0.208467558020293 -0.545898530286944 -0.128488217891397 -0.37758289538 0.0758885654422388 0.282035591627665 0.256026176648388 -0.906233609294646 -0.952657013062564 -0.854790825121518 -0.950291696766364 -0.990202251779986 -0.976933808982431 -0.889201326079033 -0.801640130308117 -0.422994567136762 -0.637103417488825 -0.673556695618183 -0.40750710639877 0.320472312421118 -0.11267709605026 -0.151304343440024 0.60444168442418 0.573612472217301 0.734241601699247 0.586999192680446 0.405661771511282
-0.550148275634424 -0.00227007240617748 -0.423318836247855 -0.369705068046383 -0.532155142052202 -0.0764720467470047 -0.325212000189392 -0.508792501047126 -0.246537569288102 0.00128857826681197 -0.460375971717004 -0.528264235993129 0.146911749345771 0.0795978035914107 -0.382020732762986 -0.146678746825763 0.366992238022302 -0.0182654344990483 -0.564913843722711 -0.0448514755343585 0.519455898780055 0.278756054270863 0.239917217127583 0.653563425882123 0.620877553471576 0.357405817214017 0.509392293612369 0.558919141755876 0.605293656163028 0.352173313319073 0.127660067325573 -0.452911156129999 -0.452464377529002 -0.142377252685317 0.258341623144822 0.269788361159293 0.179766714817671 -0.5815356086169 -0.545376871105217 0 -0.379735239696902 -0.0249140076180089 0.712946562386105 0.467512872041495 0.287442698845123 0.488511589259838 0.113257867496312 -0.108620379442945 0.12608233800446 0.764091857950605 0.322966207196766 0.41813720947078 0.344398279097964 0.761878205535973 0.616581690551192 0.409277023572577 0.176880214225496 0.195763444379887 0.406372645857913 0.419123399897349 0.0784714271496174 0.34712264215227 0.102642616254538 0.0506245675483673 0.154795527837153 0.513512592470585 0.661070540727072 0.684390130375173 0.699330691310878 0.830713037864868 0.758380187080441 0.751875943977797 0.79253131246856 0.880489575701588 0.802643386978535 0.717335149489838 0.879521252400724 0.858313330788316 0.827783716495318 0.829924216446178 0.88371215374125 0.889461171151065 0.819484385000583 0.885421712025134 0.847376379615618 0.861109062502735 0.567519612427831 0.70333669140467 0.872936728982529 0.780901286622713 0.614375460377705 0.735480974776096 0.810338045728687 -0.455664998876728 -0.89255951810404 -0.786946937845493 -0.79620558210664 -0.956948412314568 -0.964971910271375 -0.752285934502633 -0.897826999279856 -0.959624184787405 -0.824396590682539 -0.730897690833184 -0.889047586385539 -0.86034832131562 -0.978145994500913 -0.0381953514446194 -0.433517881288754 -0.785464368265123 0.781019026218651 0.995683496315862 0.950647823773859 0.431394643236129 -0.511165226809462 0.000130687167271532 0.1730647747308 -0.314332835503457 -0.218058308373702 0.253907493065038 -0.0147414683770956 -0.436714961291279 0.498339230922462 0.619000565906345 0.0868850253525597 0.192465368688154 0.741876516861328 0.428582481799866 -0.118150550977061 0.47644366592425 0.80573319660683 0.46801388149894 0.489086156974096 0.921430612958782 0.499397988975711 -0.316708656757259 0.143599243915689 0.377666801824772 0.215873722536412 0.145061803855429 0.348217019985471 0.0543630280980946 -0.0849892121035085 -0.167887304945146 -0.0993960598612667 -0.476843937977237 -0.561588840846466 -0.138364123525459 -0.139364917257075 -0.016209420766672 0.330150172062392 0.196639356651524 0.345409777011172 0.260111551342067 0.316533898878072 0.462894178946361 0.746127821822004 0.482267755348908 0.626919897872395 0.620298277239325 0.605855923806492 0.568078692386517 -0.224818388829071 -0.545679304139507 -0.690966165851915 -0.667489959525307 -0.825857175606182 -0.781991221475539 -0.734400916850681 -0.792697582254471 -0.8998159496268 -0.778764513230817 -0.60653080099418 -0.823163808599033 -0.913294029707105 -0.803830755458369 0.117428540436395 0.105630033321275 -0.795587708650822 -0.423493891543563 0.901781088503628 0.434952672933721 -0.750236483910767 0.874428934696926 0.951632844918208 0.603145595893154 -0.123124576950646 0.980018082444593 0.978845452123371 0.925979018311069 0.97330356023784 0.975099520983743 0.971335271212231 0.928303317480674 0.947177114149351 0.943351295569886 0.950563716061129 0.981996934972197 0.991565545094495 0.981409121201544 0.9850813107591 0.995594381950162 0.996404560183536 0.991186974874867 0.997063531042438 0.998232772714631 0.992516845615405 0.990915287731152 0.992945536573165 0.992071002088675 0.975866377169507 0.973714291861237 0.979198733797823 0.966196409803941 0.801568778026866 0.571160643964077 0.811865867903705 0.717479947872553 0.285547576445651 0.244911508189176 0.453624277755696 0.0862115096216907 -0.212493563463173 -0.0541503492562375 0.0958771436681182 -0.383239389723661 -0.317387297639878 -0.506130262108064 0.0782686136070744 0.696654260405221 0.0341438157361541 0.364543193242988 0.122312465233933 0.166410308601586 0.142843257740776 0.0307128352802864 -0.125180533529477 0.0326614127479754 -0.0247858273163635 0.109882980029267 0.232645954339052 0.0240024489826158 -0.101630614900052 0.525747155380655 0.535909534793122 -0.555063864369124 -0.776657478081854 -0.601417851361393 -0.758895425844922 -0.570203451672981 -0.53702138705331 -0.767026856222936 -0.967510187040703 -0.979757930601224 -0.947347041388895 -0.981313128727625 -0.993963706693035 -0.984920629622784 -0.907859878993288 -0.869858503629502 -0.526217007604064 -0.802366672641099 -0.817405474409464 -0.773393532293358 -0.315166476509273 -0.693179989316615 -0.704027227623815 -0.00103645930880087 0.185016478842822 0.434942327471958 0.185580759134804 0.209296489588846
-0.538749017128977 -0.0198028209782516 -0.498057629941335 -0.302725600283736 -0.494707134609286 -0.172503501643712 -0.403662015647182 -0.49263490722539 -0.283808765997864 -0.206827386653288 -0.539750167558632 -0.521922081477444 -0.0136767647227143 -0.174541864056955 -0.460462244957096 -0.242539485387808 0.0666448084688912 -0.35138985404554 -0.625769839861833 -0.194969414114426 0.248346311879437 0.0058650432702495 0.0768879916692076 0.397134526955314 0.322710238654754 0.0545170716501794 0.232719068007254 0.332946249886269 0.324118512409001 0.0153536483897322 -0.0775617563942742 -0.35897410372234 -0.331740179795301 -0.0278332668945768 0.271468955471663 0.281634804177494 0.441651298730666 0.369453221303241 0.394626676260379 -0.379735239696902 0 -0.468829864529756 0.0684764350677917 0.191544592120241 0.166009228367682 0.144443773742589 -0.140385718302327 -0.216968608616689 -0.27920047708129 0.481929347060088 0.0490317001453299 0.25045522500616 -0.1554911501626 0.578941212365929 0.425117533151096 0.196139128676871 -0.166830183323148 -0.150440516546342 0.237257276953811 0.370919287317161 -0.191259496635384 0.204624560500483 0.0721231720180875 -0.0307729607229911 -0.0025743727825853 0.451160670788505 0.608087623675012 0.587638684060514 0.635121229670194 0.810428332682855 0.669647210342227 0.652137155905568 0.710490085515523 0.84287333708745 0.663687429063235 0.559168521988822 0.784957023639477 0.801091729464443 0.731080866314599 0.656207089800362 0.746764660149364 0.824189354617612 0.678531073492973 0.742809029553335 0.781098520661247 0.76087305746112 0.00634431267732264 -0.140377753996409 0.661906804850319 0.194684040969961 -0.577693633146943 -0.657676659998879 -0.348044993554991 -0.863625504300436 -0.923852777959002 -0.929927070387837 -0.911749885316484 -0.940586770165019 -0.961301611824363 -0.857792401227804 -0.901795069503919 -0.949196971331073 -0.855178172800034 -0.772146253742109 -0.887172550989239 -0.830858152853719 -0.9751020475572 0.302102187207489 0.880362549612902 0.826052693615498 0.923066366481571 0.995981921347076 0.971374754584073 0.505293736773976 -0.23518055658295 0.382876603957094 0.504203580955269 -0.159623562509798 -0.0786710354491066 0.494911939872269 0.0363911764065058 -0.537047807884963 0.147514631538779 0.507855770586361 -0.299251116457912 -0.47694917440209 0.251648159103568 -0.0273100332754123 -0.59716831398612 -0.392685027202338 0.564897895706832 0.0508747151895396 -0.120205859379389 0.804587788856857 0.19608450442258 -0.492726250766174 -0.0156616409552099 0.203121895934633 -0.0298134017697816 -0.0817455117227741 0.17234820616457 -0.0340003397177508 -0.106569101977969 -0.215421764319594 -0.0871174794540917 -0.439838998589589 -0.519757694826742 -0.137349727338645 -0.13255849180897 -0.00944491212003131 0.264225996983506 0.132054888561579 0.283413698601738 0.142906009275824 0.212732269673544 0.372806648530419 0.685318050627798 0.411217452324822 0.602046182425018 0.594696514865453 0.575196282237533 0.514723541911093 -0.219951586081212 -0.51534237041971 -0.663450456709781 -0.603146324165057 -0.810047508409174 -0.778437455532801 -0.722478286645503 -0.762422764639912 -0.901485991639051 -0.81365800509916 -0.662164756458137 -0.818962030838779 -0.927047034685939 -0.891665211499162 -0.262101701832261 0.11878085886232 -0.812774736713711 -0.707776844380031 0.898289482474305 0.608604896159733 -0.800479288613628 0.812395875670736 0.963723839584954 0.762425440086326 -0.397034196665504 0.965333486395323 0.976098869812631 0.920691461356959 0.941392891533133 0.962501685666157 0.952499742521601 0.885599615800137 0.922092275625002 0.924098291154236 0.965637707263271 0.985058246573476 0.992846518723779 0.98459513865377 0.98795499417072 0.996592380597549 0.996845460782857 0.994019268379156 0.997781220223545 0.998271922970074 0.99352945785164 0.994963559571531 0.994498987259608 0.993593233787698 0.981162014784018 0.981597863154518 0.986427746841829 0.976155373774264 0.868082867553855 0.717163114399976 0.869128608438942 0.796989680046414 0.47977528440184 0.435318928618721 0.638025524760973 0.32861599962276 -0.12714742466372 0.0275562556025796 0.22675916641264 -0.318736695224963 -0.279772320773749 -0.439822045289833 0.27766523938689 0.72092285949895 0.0856616193425591 0.46819814178639 0.275036243314576 0.268094799692045 0.238910953166478 0.167345516360123 0.0571368999370593 0.183666821399562 0.0893854657095852 0.276074584835647 0.409969989208796 0.186460633313115 0.0534629269832476 0.668943099813033 0.639290264730116 -0.405975191796074 -0.770761356679629 -0.28056083850638 -0.726460587143012 -0.504769313655811 -0.135685333048132 -0.236326790216367 -0.96817333438932 -0.975644239725332 -0.917083040060986 -0.973911110786196 -0.992802406527159 -0.980122080436258 -0.852361267126133 -0.789774253440335 -0.21725348574918 -0.643304000565571 -0.686086916385219 -0.629834839506423 -0.162384530109832 -0.654131801926252 -0.675887987273465 -0.153721969536242 0.0139995093640381 0.319869247731714 0.0337592380679223 0.204455749578743
-0.2566380874796 0.443660865764278 0.0554608993628432 0.305523515789285 0.0291219225573032 0.538204905222763 0.347241514167051 0.0371400700269161 0.307420818477684 0.506460746323409 0.336743157559304 0.141328173498894 0.584297302928519 0.596175163457603 0.343784247704157 0.503930138501962 0.724372681542436 0.59480133579316 0.0247350170598075 0.479058803077853 0.682268462599442 0.533173430073374 0.406546911084453 0.644552059464894 0.5496580270297 0.0700869240213073 -0.0587223308556444 0.282610484855872 0.245263700622707 -0.439649702250348 -0.501277428913848 -0.663148543766946 -0.58747811495686 -0.34642183308988 -0.00433784272884913 -0.0200186177430257 0.28029211541356 0.108924504846949 0.215605319683302 -0.0249140076180089 -0.468829864529756 0 -0.500986681241948 0.15867559926815 0.232460151673504 0.424230423401673 -0.142072103169082 0.250405031724245 0.368406538020087 0.693049673908327 0.346429075425565 0.56430818019969 0.39247672039045 0.734441852441791 0.621525651545709 0.4990459210758 0.260382199935793 0.0549280201605538 0.363774170656099 0.603888073311308 0.0392148546987151 0.276125131711125 0.188002096072704 0.208387640676124 0.150463306006218 0.53871538138134 0.660870821668243 0.639417211099071 0.674659837817964 0.846693887607381 0.730816662976847 0.716407884167528 0.751350925092334 0.864277289617557 0.678195676404268 0.579247224995795 0.807449126170348 0.798789761337211 0.717932924445731 0.56457314937149 0.725748952907421 0.791129774085339 0.55586401643482 0.588607361480388 0.666476887785844 0.598199063524122 -0.398185370972776 -0.524990711699828 0.124810589780563 -0.355627148283016 -0.706853563051724 -0.746140976658191 -0.614470034640438 -0.869961227966648 -0.927347514625401 -0.910941185973445 -0.894184253709113 -0.936024852998317 -0.950306050201334 -0.814896511582489 -0.88741210520099 -0.943669924038741 -0.802254451640716 -0.719024542949461 -0.848694185879286 -0.760107313966646 -0.972783441750991 0.226803557287421 0.582762893483557 0.282395479253462 0.85046216365641 0.995138095058142 0.959486617903118 0.620831415377265 -0.0337186034592849 0.389036536843234 0.624319877573212 0.483318056036019 0.200828120135522 0.793390346882533 0.716865461898912 -0.308485644247286 0.414211971960441 0.799969672151523 0.357591724993754 -0.279130737031345 0.392659471847527 0.458168927551176 -0.478586896101318 -0.544737924315007 0.54791407700825 0.313198882730235 -0.200078285987442 0.684513408062591 -0.130040905021296 -0.67778332035258 -0.406547755824606 -0.0687424186780127 -0.281819582442513 -0.361639918715551 -0.0993632088367981 -0.333016675520964 -0.262823589206038 -0.335117695473251 -0.211926796560591 -0.510231513654805 -0.602967129386087 -0.194755325129579 -0.217743964238621 -0.131782731449302 0.19287294614789 0.0681312206429907 0.228627032318173 0.0756086600785784 0.200366989366628 0.390274260390245 0.693771723418332 0.441735092275425 0.596342528911668 0.585013548261069 0.53929228721975 0.486657430353323 -0.305067131623355 -0.612241445993342 -0.727911568470485 -0.661159153060747 -0.848904836454061 -0.826653263708638 -0.769626280388152 -0.820495045944984 -0.921442039643604 -0.836154663664497 -0.716935498670484 -0.863042258760293 -0.936435182431998 -0.891381691267609 -0.104472923083991 0.0477302438437132 -0.815109976466189 -0.658047122117772 0.899839764961905 0.517618102295222 -0.785405693564499 0.835984154578774 0.960425656722862 0.698196731402725 -0.351813816669809 0.96710011696433 0.974358019081118 0.920378441994829 0.947118065120366 0.961527917662661 0.952757434244397 0.88930150702265 0.922313705686238 0.922883345789115 0.969724083805629 0.986704752248219 0.993244891865317 0.985108800407335 0.989410248895565 0.997000888186859 0.996575219292009 0.994591099754333 0.997992962949108 0.998447830192162 0.994028628053687 0.99593089711513 0.994509444522633 0.992912872473999 0.975156428954326 0.98665493283956 0.985973441161868 0.977814860183164 0.889898208016738 0.785256050253194 0.88606619148622 0.803127156423529 0.475126677880277 0.345684051775942 0.54934120613514 0.135627031379529 -0.259791090490816 -0.102632405690294 0.0359933148574928 -0.507170452789451 -0.48372701880336 -0.598594999623876 0.0898605941782286 0.698050162345797 0.0131400384308425 0.414984371102655 0.203141958257777 0.253732637276119 0.22393333822172 0.197561986737249 0.0415559826197396 0.14075569672625 0.0914072981635713 0.304309559205131 0.440727613150199 0.226230705502346 0.145799577163609 0.714024781004397 0.730099171979408 0.0147933660104782 -0.46571029449949 0.257866580152067 -0.0659475332511567 0.228707954633141 0.555337614237242 0.425438955742348 -0.908060572757444 -0.932221123778092 -0.835117905102766 -0.944043009208681 -0.99142211412637 -0.979379942155787 -0.837776434798941 -0.724387689207972 -0.437035164628707 -0.558793431497597 -0.511747594118391 -0.509597321382923 -0.0524754659373304 -0.267777971152972 -0.323520619360355 0.267629304231764 0.349157957823675 0.605676935716755 0.479593298207385 0.247501355801315
-0.554846766557017 -0.0123738711903052 -0.433747853963277 -0.296886447633382 -0.557499829236061 -0.133140583328948 -0.34511881883128 -0.587975876986006 -0.408332485026187 -0.0207983876610873 -0.494764246655469 -0.65527619832067 0.000241457949888849 0.0499498569486512 -0.496504340604192 -0.379743673667464 0.212093897201707 -0.229212343410894 -0.767230407735003 -0.568634170330567 0.179036159336794 -0.135749747676453 -0.217761950237594 0.149854452412615 0.100112636302588 -0.317300805026454 -0.11947212764714 0.238971279554017 0.164623829235276 -0.394387676566143 -0.331774566230911 -0.55528137922724 -0.48636891190078 -0.151559699664948 0.439899983812331 0.435418648186981 0.506067795292715 0.355439213030108 0.389055087937463 0.712946562386105 0.0684764350677917 -0.500986681241948 0 -0.357854806428087 -0.579942377303557 -0.223175071145035 -0.683977521975364 -0.710396135033165 -0.392558814622292 0.435259708003963 -0.125140438282086 0.232343544208303 -0.0762407242749673 0.636429575449368 0.272653728054162 -0.0310380132831196 -0.212941631500318 -0.290949148760086 -0.0687869800006312 0.0448344752221994 -0.373549488497579 -0.136221069851663 -0.304308980700578 -0.326905069500096 -0.244227628456158 0.175290827036554 0.454793784702442 0.441721742720538 0.499310915187601 0.731526631779887 0.571757301809793 0.578583587804316 0.654687754673355 0.807752759703947 0.547114930401394 0.464472031678403 0.764739475446568 0.732165713563299 0.622561194483054 0.510215655807707 0.710074518981297 0.704889149791305 0.394502114519341 0.547239390449338 0.588286178773529 0.491994126387053 -0.371798725827555 -0.419106038237759 0.239700662563646 -0.241446730378066 -0.565932735165754 -0.607336982784345 -0.395387072564384 -0.809808155807972 -0.900451462874837 -0.879129707949435 -0.84811306159018 -0.912951471802128 -0.93678167235235 -0.746314665292368 -0.880398458008957 -0.942323345707616 -0.720237723235992 -0.657963790268756 -0.839629494444459 -0.780721977189316 -0.975086518493416 0.125219372448645 -0.451165049410168 -0.705622710045371 0.757193226267385 0.994763419218256 0.946915024360137 0.76003300780761 0.0424434821115589 0.2047127291072 0.514108423747678 0.498880908572288 0.349669471847493 0.686867847549293 0.733023435506859 -0.0700389204412657 0.50676567344409 0.799984842215164 0.400819439211486 -0.139564467435921 0.439571659287241 0.462166756472633 -0.44484381827765 -0.492550068547881 0.562954701561565 0.331878174083756 -0.0978407699461296 0.717210812349037 -0.0601677990865606 -0.662236688736723 -0.405854740574094 -0.121263929225659 -0.247330671605176 -0.323025781695159 -0.139014488090067 -0.375755378312545 -0.346470541980432 -0.420527182690751 -0.320266034333934 -0.567560448640706 -0.690616367837507 -0.414116470637073 -0.433853997918156 -0.37854001151988 -0.0300925604727899 -0.219273063577903 -0.0363407380928329 -0.138226220476523 0.0248094654520469 0.167438882405783 0.554344663857372 0.120848993488683 0.464750418344856 0.477227919235701 0.347084201283557 0.365470576888543 -0.505406515571971 -0.709821140795755 -0.7755723115959 -0.703936562339859 -0.851646836074383 -0.829463522438824 -0.793315744003111 -0.82443433373155 -0.910768018986343 -0.821220064134567 -0.686827351778177 -0.84375171794452 -0.924667027246841 -0.853404438576783 0.1549012473488 0.0965551719178076 -0.752990571940943 -0.426258538884392 0.908330995122774 0.570635137898466 -0.654132624958474 0.892072838536704 0.956121880384714 0.75573406859455 0.197458059628637 0.976015824865816 0.975531875464575 0.922806449016461 0.96189425941451 0.965266270273954 0.959711108598109 0.922113255116781 0.933711059248841 0.929885638754733 0.964212033173443 0.985248887616893 0.993808938976676 0.984629270200538 0.988264074446277 0.997644645432214 0.997474030452097 0.994617350596667 0.997929250286791 0.998623090038026 0.996024663576757 0.996271698823852 0.994286777939705 0.993212682887495 0.971774372467122 0.987910971677761 0.986292366167273 0.980019193587177 0.85986449808121 0.680424137414591 0.831188634016308 0.702714459607173 0.130824917690302 0.044641480122036 0.236085022447437 -0.319176423342945 -0.439807277785448 -0.221051417393455 -0.190329712327835 -0.642681025780698 -0.579508903501781 -0.664232259866561 -0.218165899249529 0.641947057395062 -0.097120313075184 0.201066101656469 -0.0500463845624712 -0.0251531022041947 -0.0712339436593292 -0.285318719447471 -0.428140544146833 -0.260511017113086 -0.324625146034361 -0.265496705476617 -0.0598603210602659 -0.282822831895459 -0.490511923049798 0.409575992371194 0.557114574490714 -0.672298775437228 -0.864900002570047 -0.51946317177234 -0.831486045556524 -0.609738221542836 -0.647074502657951 -0.906558850887081 -0.974951160561107 -0.978679510347871 -0.960457454372834 -0.980911538864009 -0.994157754000773 -0.985363940752047 -0.850804731283288 -0.751855910367645 -0.377331683938713 -0.610289907866229 -0.586072982819591 -0.609452159095598 -0.255264094117097 -0.489108179452827 -0.514869280175315 -0.0535037054959544 0.0928531986812563 0.403012120068548 0.267264834070291 0.0837086922413388
-0.609473869243258 -0.257169635050583 -0.658542434041245 -0.506440977904458 -0.643178288102447 -0.452769907584036 -0.624455106926415 -0.671204666917009 -0.543759654272068 -0.464378079061266 -0.772176825228362 -0.76176017266864 -0.410385629678546 -0.530538208681114 -0.7686442237253 -0.73166330310631 -0.549331225893438 -0.821555503331067 -0.904071659741268 -0.867501611636585 -0.432545198911139 -0.610557447865596 -0.518059384425288 -0.241777856024937 -0.320491775601363 -0.621365195563217 -0.226726606117338 0.0928942866409482 -0.0631060965470388 -0.482616211140266 -0.312823004096292 -0.443390373781402 -0.407943740217886 -0.0431706819482654 0.487670925806645 0.443401317143376 0.508979189192996 0.44797523396211 0.404266137535196 0.467512872041495 0.191544592120241 0.15867559926815 -0.357854806428087 0 -0.468565268762053 -0.0727945734861992 -0.317158219202924 -0.738432487368584 -0.704901152743705 0.307903814387466 -0.164504359399748 0.0168760328831923 -0.396583016677131 0.497297452826884 0.224125743394488 -0.117279599845007 -0.371286047620262 -0.27864533892672 0.00551898037540315 0.0258061893556669 -0.370625970040595 0.00328474748157009 -0.192230140665446 -0.289610072558449 -0.17691123314488 0.271448458392646 0.487303522115407 0.517598412407107 0.565000871686418 0.772983789745956 0.68347347103663 0.616801363800689 0.699735143615836 0.850407565383205 0.643547221493828 0.515854563050814 0.805126880992705 0.758043661710537 0.652673274612306 0.60952963397118 0.705494791937913 0.739853078281552 0.573319461564108 0.685174436534203 0.736921445719456 0.610948925608477 -0.396651214321872 -0.60442864162922 -0.130661550785575 -0.65298003087679 -0.900282793055726 -0.948278134517315 -0.918840158841349 -0.941398922567384 -0.964429484270129 -0.958457557269581 -0.950007651672838 -0.950739479162034 -0.948353421239233 -0.886611623963939 -0.93355046534197 -0.956042253083933 -0.833529488836908 -0.82389828294808 -0.920366509466733 -0.87184428178196 -0.981061537070491 0.202331501912082 0.656957013559145 0.290092513530752 0.882880187713096 0.995124934934468 0.944891141263902 0.558566700546437 -0.241090156849101 0.185789386679889 0.280392579601707 -0.204979547786511 -0.137917060012268 0.30833363898366 -0.0278346967373667 -0.670830866094952 -0.0921549638971884 0.533779903113871 -0.575800643793475 -0.673212522248842 0.010396417467721 -0.247321707162458 -0.760182362003251 -0.654269290076735 0.536361131282537 -0.105885868793404 -0.442955575528198 0.750753171615018 0.194738666521967 -0.489211100375466 -0.0170860202291583 0.179624802898164 -0.0215654622320197 -0.0766601640396194 0.160889777794901 -0.0392117313075204 -0.107748237469532 -0.228132270672058 -0.104648594434596 -0.468236306275755 -0.541662300655824 -0.190114794500782 -0.203325161742528 -0.0918735477737773 0.204436420407418 0.0366655532458684 0.184667831176922 0.0878009620641429 0.18471501107366 0.312791866736993 0.643796744762708 0.357579397788586 0.507376002346472 0.500622843640786 0.450983076065514 0.402713170709334 -0.273649403141204 -0.516983762306266 -0.656064950443925 -0.611239530603261 -0.779820245534819 -0.752688177609252 -0.699125056279334 -0.749632195628057 -0.877721148889647 -0.790157686499928 -0.672098166848339 -0.827159751355196 -0.926689062531094 -0.883022731595352 -0.158177054186001 0.150273544000065 -0.796170493362083 -0.709132975465385 0.908757980223723 0.672648899607756 -0.747520128177116 0.82456850098963 0.960592912916886 0.789764284953914 -0.235473985344217 0.964467820746123 0.97504732992849 0.930448390564591 0.939891093627304 0.955109553195292 0.951515306417348 0.872069599092738 0.891868871164697 0.898290352770293 0.960169115274657 0.98378747905597 0.994676433354053 0.984906465350288 0.987836012050305 0.997989882690426 0.997324384800843 0.995198582816374 0.997809449004654 0.998688177978682 0.996756163793421 0.997295703974751 0.994929943190158 0.993940541074722 0.9723660694288 0.988587864433973 0.987417525719798 0.97977496950204 0.849769862779488 0.689857191603169 0.849216778050878 0.71944905347901 0.294791363026372 0.283577668170623 0.483927090804954 0.00871493079467638 -0.247074892532941 -0.0810783348564354 0.0180972562630932 -0.455465791007952 -0.411899602156922 -0.54939532122129 0.102140155128835 0.696179738507778 -0.00458571481788028 0.365512827655554 0.107303301041567 0.0998237012702618 0.0636531692750278 -0.110779449973207 -0.238468088677368 -0.0563784578819726 -0.150282024310562 -0.0737098203394986 0.136071381886251 -0.076543188342375 -0.306142066315223 0.477990513149051 0.557792399659115 -0.640692265584381 -0.882885075996692 -0.526674456671581 -0.881566438972204 -0.816678974837785 -0.806593108395742 -0.953270162924428 -0.987367878574453 -0.988080209431764 -0.977841588304465 -0.991147381333118 -0.995832637591756 -0.986152041369722 -0.742598212728963 -0.630152384793461 -0.063881757129893 -0.496246219544949 -0.527591242597438 -0.550650003392618 -0.240174483073988 -0.599277619536962 -0.626610762683445 -0.328422381486299 -0.208040097133238 0.216359312474918 -0.0666876485331209 0.078216071219843
-0.334058339251551 0.280852229150518 -0.231995840960642 0.076200135895152 -0.169325992388973 0.227444529975067 -0.0538509165432778 -0.221665104912345 0.026142047993493 0.136040858855669 -0.163819550419006 -0.203689573871582 0.270225953692894 0.107640094007742 -0.214876262582388 0.119652995965174 0.0960750952528113 -0.597488317392056 -0.779852874357266 -0.751431445339629 -0.486794509255266 -0.663203504938515 -0.66220850654756 -0.664792316131692 -0.702054460644858 -0.831721452173945 -0.64272936172356 -0.496019012292365 -0.570961981285058 -0.749404202850093 -0.648437064928448 -0.608796062267369 -0.541965908733275 -0.23194810647234 0.172349139606422 0.23520438130762 0.412689451478836 0.432140381333265 0.332697879390306 0.287442698845123 0.166009228367682 0.232460151673504 -0.579942377303557 -0.468565268762053 0 -0.560142999312011 0.0854807536094962 0.187426295746808 -0.60412943470811 0.204177164447958 0.0483663533191451 0.31227645608135 -0.351061810552422 0.498405126320322 0.462234740452958 0.263356383518536 -0.142910480181852 -0.231108635542174 0.209247639280791 0.476300816164783 -0.213089389908738 0.146659755286076 0.102285297172959 0.0209650502374384 -0.0279512945701772 0.459090626889017 0.639947183063029 0.591631374438229 0.641381912554027 0.810641086175116 0.697503341387048 0.657887519987222 0.760031175987207 0.869887288108498 0.603419577214298 0.473148722580957 0.769589416961958 0.793029493171726 0.681384712292652 0.455085384018695 0.576797819318626 0.773121998757103 0.540882854897526 0.504902881246624 0.60146071746432 0.223909152358249 -0.736941181604947 -0.865673110659145 -0.789236569062256 -0.832015371347338 -0.927979272119062 -0.948645157932093 -0.910587166989842 -0.93330730624226 -0.961504041113472 -0.955387388158789 -0.936770384108345 -0.951425419968136 -0.953184437063829 -0.880512480959706 -0.921364035332192 -0.955950752545811 -0.821557417062095 -0.779723887841498 -0.887210912401968 -0.815694201026869 -0.972306958445418 0.309007618029572 0.848056172330752 0.78151026898434 0.896860544371532 0.995418941834436 0.962219081214859 0.61717635608195 -0.056833051893449 0.351569470520854 0.53979972840857 0.29003084871285 0.0979057126152239 0.673931162362685 0.494089352111326 -0.625975651831352 0.0724876276903723 0.675059777542174 -0.252663873000743 -0.687012875031216 0.0505351787560739 0.177990919660417 -0.79284881595587 -0.780280725244532 0.471527511043115 -0.0313746676229406 -0.685820284364022 0.468875510241821 -0.212658171273738 -0.652534923063325 -0.269615038389194 -0.00437617361687192 -0.262530201464584 -0.323642088441923 -0.0250899924179698 -0.179686553807595 -0.133656143633552 -0.253771497677063 -0.0961270460543047 -0.432363925149082 -0.500226274314265 -0.0698360874220258 -0.125533325201065 0.00412144659639985 0.262558178930066 0.133198210068188 0.257091770958909 0.106476967296113 0.207592505957224 0.372004644099221 0.678507171170899 0.438724503273792 0.590078417875531 0.583612588465789 0.517723264444501 0.476418986735271 -0.188228520976184 -0.50629104294159 -0.650862987976024 -0.562497673127493 -0.807237522883971 -0.787731228716614 -0.727450737536281 -0.750832690050093 -0.88795749626573 -0.826099210468408 -0.709592182425906 -0.851447515974023 -0.942873480002047 -0.914465515554246 -0.245172987803141 0.207483826642532 -0.809418631934964 -0.767297237130699 0.896192170091514 0.683378105730081 -0.752408883182243 0.700324828017017 0.94564417573735 0.752785289872581 -0.420074602990032 0.944633442549934 0.970429679064298 0.908302734683132 0.930261929068016 0.955269080223909 0.948604067591235 0.871364158310495 0.8935736105863 0.901234294297548 0.957886503135215 0.983787014196452 0.992442136329229 0.981833961919092 0.985882511201805 0.996874015710786 0.995785202204229 0.994362596942857 0.996951218915529 0.998028948701781 0.992810514926075 0.996305811763089 0.99407618617827 0.992265175674094 0.965761736050175 0.984531621435837 0.983497944416843 0.971380146851889 0.896592948622949 0.825758005953445 0.885768748907503 0.793871933550029 0.573347552950702 0.560356923080604 0.676751176895919 0.300987680678869 -0.142059269077584 -0.0119219002231292 0.142581203609443 -0.407174129938982 -0.428600037277915 -0.519461851932063 0.306343324798004 0.746207145663014 0.0470854477300734 0.514263075827413 0.304475119147596 0.32052114324081 0.285166836729785 0.231353976147001 0.131373052103261 0.251285543166758 0.151866841634366 0.307165329538262 0.463580866340368 0.35305841474223 0.186985547483918 0.72697363854917 0.76279653940799 0.174461312283913 -0.271449369248798 0.513282387617757 0.282786617202344 0.126398925879849 0.641388776456447 0.191319106801944 -0.896456421745495 -0.884361735850349 -0.736939858048148 -0.918611889552304 -0.989961067411876 -0.974346030119493 -0.657671272200894 -0.482423313037648 -0.113719712017214 -0.329844296643344 -0.289000088322596 -0.430740447852786 -0.228774082658983 -0.427134816829168 -0.477109428265054 -0.284300869966334 -0.180133707802473 0.334402038471562 0.104535696832162 0.0795640969643327
-0.229802222531646 0.395086119927042 0.049894631326392 0.291519261272806 0.00902306811324013 0.460516176516261 0.262557170501027 -0.0122093574757543 0.181792597488934 0.463740677336325 0.367300162628767 0.0332431627357892 0.522836862372794 0.549881216889103 0.300082436627616 0.426894765772405 0.67263812917263 0.396927006935546 -0.388204456944673 -0.348829437957642 -0.00661714340754452 -0.343351775083181 -0.430612612305649 -0.508468838623792 -0.56268190655248 -0.706162228925803 -0.60142302457015 -0.46017669213848 -0.501660420456937 -0.719795980956824 -0.66078662572627 -0.648056418689017 -0.565018612091211 -0.233959649382756 0.239456173006156 0.293220429694957 0.433124503306811 0.360919533228117 0.439749422324303 0.488511589259838 0.144443773742589 0.424230423401673 -0.223175071145035 -0.0727945734861992 -0.560142999312011 0 -0.460552258922951 0.0547083436420244 0.111932636737127 0.619485642203656 0.205830323302225 0.564368829480306 0.200365239988163 0.717352940515141 0.571096515006447 0.42735892824691 0.0904754616543634 -0.201991420880055 0.157102301010499 0.454632515357125 -0.242215104694852 -0.026004054463755 -0.102370594619649 -0.0701521651911007 -0.0814524422913497 0.348579707665597 0.594306321064232 0.556472591599743 0.618972664251116 0.76943163681817 0.64852688850001 0.660829383401002 0.752123872201815 0.869299426438585 0.560127205411631 0.45566640762666 0.744709694956264 0.784797402767833 0.662385745145489 0.238196176925287 0.540928689407387 0.748941320032305 0.236936960592464 0.056498445304482 0.0926508954687043 -0.335780645582856 -0.858549032903664 -0.917666032023243 -0.854902600628874 -0.87656906853271 -0.893761222957493 -0.904462121630608 -0.878335892587126 -0.901952578485136 -0.939070498636045 -0.924695714997955 -0.908885245873002 -0.921523935207455 -0.922581658030212 -0.828150137361266 -0.902743994669766 -0.939082555456971 -0.751270553327961 -0.727648295184853 -0.870673783197911 -0.778520306343574 -0.972681233697601 0.201304832956609 0.240842226663642 -0.111147651485891 0.802909569476839 0.993777516647334 0.934285553400397 0.703006128543893 0.107182799558199 0.298813964241497 0.602267033750812 0.655024951587449 0.395360470519059 0.777496310488772 0.84406331254045 -0.094126883289834 0.400327762332096 0.823411149178204 0.488617552321458 -0.515738911603687 0.388393115149704 0.598828296573986 -0.695988672771701 -0.791861205633818 0.462705281232362 0.286240197283146 -0.722000294817737 0.120699113074439 -0.442922025558851 -0.74068542518141 -0.568950092477225 -0.27921282802577 -0.419247627324977 -0.484261504479927 -0.282812264665286 -0.435142524999226 -0.313308194295492 -0.397110723643292 -0.277403192309051 -0.534234045560043 -0.639934730236814 -0.25631735689278 -0.330763691503459 -0.258311548519288 0.097470318731863 -0.0658583144225892 0.0897645051390034 -0.0514425917097205 0.107703101567461 0.286855324191786 0.605341353067552 0.25901871472812 0.557580134688209 0.545625918514157 0.42711505885788 0.423110119822414 -0.422215501471751 -0.673603538094864 -0.742810187587188 -0.646400213670726 -0.862606048263593 -0.850186459645883 -0.808909091247064 -0.830843861278248 -0.913903931899449 -0.864195406200744 -0.760812128838465 -0.896159908406101 -0.951508695677633 -0.919116174384764 0.0942697979711821 0.179653118225589 -0.794214044952552 -0.661389274046334 0.902650605219624 0.626321667805833 -0.683878199814504 0.788173794627364 0.939886621381423 0.71235183934004 -0.139618070808763 0.950713630756292 0.96460633543265 0.891989131291875 0.934372841270768 0.952572647262844 0.941577544169912 0.878551926172248 0.903462264094618 0.904815636991809 0.963136996862253 0.98429598565119 0.992668689015923 0.981774272605159 0.98641451064614 0.997160701447278 0.995583851215643 0.99381215746403 0.996916862173397 0.998117955324736 0.993029687961639 0.996457282070868 0.993993045440779 0.991823409325895 0.956229928685383 0.987319005919368 0.984268644343771 0.975912480109384 0.897829267654326 0.844923835602685 0.88191117728761 0.778022415979453 0.453375107183661 0.29345503813934 0.419797196181266 -0.150462876877277 -0.387997940203467 -0.202249757389301 -0.202389144009569 -0.635790750435534 -0.628409594978435 -0.677462603269761 -0.11912831138163 0.685878124976095 -0.0731263702320203 0.313216905452748 0.0788911595552824 0.141232277536481 0.111740682874099 -0.0312489533394292 -0.213380356526355 -0.0651258953954265 -0.12177004796081 0.00929892885460712 0.244921251391568 0.0876245245042279 -0.147926803954863 0.609333516150241 0.77743159394742 0.16466306366936 -0.279009046663708 0.524211248977359 0.396766656603319 0.151396731413244 0.525031597596561 -0.457363005394653 -0.864118394456643 -0.859954502476476 -0.823550588717359 -0.925124665874451 -0.989211083718949 -0.975036256032654 -0.727739319910553 -0.545301771644269 -0.30399707252572 -0.354367579897302 -0.258852378055393 -0.374107574370703 -0.156635328393011 -0.203636037993148 -0.27635540996366 -0.0622214302314006 0.0599916947852291 0.397255349859148 0.350922949311712 -0.00618399232926167
-0.28344646002869 0.390288991309068 -0.071283051942412 0.085235740010258 -0.137844862891877 0.354771041958642 0.095770521710591 -0.195197625151332 0.0757123203334036 0.442366453139082 0.0412769508610224 -0.23245536757375 0.426518399569636 0.375784117951314 -0.0509186458328318 0.0519048577651868 0.374214582371236 -0.234209677145752 -0.721837956666279 -0.70436738877776 -0.424626357834126 -0.559374317806017 -0.57642596598064 -0.592224644597832 -0.631703888770256 -0.77098530131382 -0.618141223441915 -0.457548387819701 -0.51898189656379 -0.74908051601285 -0.654313343940614 -0.686173032571631 -0.612822028584598 -0.388328342795282 0.0985174197861172 0.165473777221968 0.320324937028568 0.145345567439289 0.0254270938333554 0.113257867496312 -0.140385718302327 -0.142072103169082 -0.683977521975364 -0.317158219202924 0.0854807536094962 -0.460552258922951 0 -0.317586561639279 0.0958035762258892 0.73544529278931 0.403853621767947 0.539404861598844 0.383956041994184 0.732255193256103 0.596934459881856 0.568069381803716 0.347990957680627 0.217050879234595 0.466959342592713 0.626844405288814 0.186552991454743 0.375530903629908 0.122555701197735 0.166121374689354 0.214046931068993 0.599883986332451 0.711867574548937 0.686802673055252 0.69632501867096 0.843758297796242 0.783991509010854 0.725505979256869 0.764604601949934 0.877104340699099 0.715987632739361 0.536998322241418 0.815820864728935 0.798155604491234 0.711994120824536 0.498951165753046 0.661907529215987 0.785193177570226 0.43047781042243 0.196906130318042 0.372151037843004 -0.357538626220015 -0.915637709664377 -0.935871265948055 -0.951949783756159 -0.951776508378097 -0.929035997219695 -0.916717515534588 -0.915010671280931 -0.923601465860025 -0.939881893864933 -0.931630588377593 -0.917073158437096 -0.919245887936604 -0.932362024677884 -0.875313948883301 -0.921911286260386 -0.930259062651037 -0.832887401364332 -0.827504746922485 -0.922984187090771 -0.889588922822423 -0.983714151533707 -0.0391959651080672 -0.223748487798238 -0.561859308156433 0.805899870672404 0.994423707273353 0.892149325768018 0.39667541898748 -0.622100213540192 -0.373702125087751 -0.198414398142729 -0.450949729586813 -0.560102799357192 -0.257714548748094 -0.327644955426963 -0.723637491075499 -0.614364135407583 0.11277799448458 -0.686544926441567 -0.810374811253443 -0.604102977023945 -0.47275728558889 -0.889294302390159 -0.869841198432819 0.218911812845397 -0.378484104821155 -0.840186349598885 0.0712569787442558 -0.276625781293026 -0.672097366406734 -0.401371684146836 -0.0643106301422251 -0.238311680646034 -0.347024164110906 -0.0752340527832896 -0.285839017616499 -0.216140288049657 -0.298807180701003 -0.174710525209102 -0.476155390153014 -0.551468590872629 -0.121298227084312 -0.187078102647823 -0.0772599905561586 0.242027870310474 0.122426692971416 0.265936189058581 0.131817956827796 0.24614566412969 0.426083482452758 0.738624633491411 0.512025885424679 0.604401073106766 0.590409374970731 0.551983932390096 0.495545976528749 -0.269625955697649 -0.59388434553232 -0.701810287797871 -0.623786455795474 -0.850539774139852 -0.83041616687122 -0.790921100010715 -0.827628810944907 -0.910755288201097 -0.863736818761248 -0.781999228850283 -0.919300623236664 -0.963178102115937 -0.939637952412598 0.0924739815111599 0.138820146374169 -0.830169860958091 -0.762658756390888 0.891074287418599 0.598112241607316 -0.709793719423653 0.718269722397496 0.92655608622815 0.661801679459552 -0.24609233727289 0.923824743442312 0.940328134093349 0.839606393845158 0.886718376619595 0.923249421194812 0.909732455149374 0.827435902524042 0.856306583737982 0.864310561817263 0.959172413579415 0.983536686421475 0.992452825463921 0.983307357005734 0.986904383908201 0.997106339357375 0.994975705031763 0.993065963701326 0.99601954944296 0.996960088108022 0.991182617374494 0.995677211627163 0.993677494447852 0.987675404080674 0.943976928720352 0.986188861767737 0.984980191989444 0.977369627764573 0.910534553595371 0.870566186289158 0.896017034193507 0.801773936348875 0.508184947504036 0.340207501143884 0.4236997265161 -0.103434425258566 -0.347403770921756 -0.190182164483542 -0.191882229043263 -0.598455179520943 -0.602481986718304 -0.670838651999215 -0.0791533730848467 0.709646859953759 -0.0459242169380439 0.336658091968216 0.0975223377343697 0.201090952564359 0.174062905389915 0.0714451358715287 -0.121685796067395 0.0235515189516767 -0.0108116536676096 0.124200978189922 0.348773529049857 0.176854671452032 -0.0638189183872648 0.687691042431485 0.819111548513566 0.191729951252474 -0.344955852831319 0.447479026419503 0.0747972698066761 -0.294116830473483 -0.129215213353889 -0.916669212991226 -0.956918289480817 -0.958218563152471 -0.959513174376115 -0.980217797268751 -0.993315757851054 -0.98304533663464 -0.664265073016944 -0.510076094274505 -0.162099734388553 -0.340368419515517 -0.231494859649356 -0.37362751220731 -0.154258544560486 -0.258711727402909 -0.318584379828584 -0.128638532501747 -0.00138756880270043 0.413845381038592 0.307039012079846 0.0294448210196651
-0.355763417321703 0.337480497376984 -0.210160707384247 0.0350129556860451 -0.206971311720733 0.238875691537767 -0.0210374548437983 -0.23547756894549 0.0252649019643098 0.292193579957884 -0.111777343523569 -0.259146626211631 0.307867003760184 0.170480667567109 -0.130277369016839 -0.0430041188007944 -0.0560202878552734 -0.508499578593751 -0.698143287185926 -0.749233915051325 -0.674959716317586 -0.639197879649761 -0.557063118359532 -0.573795902033937 -0.666280974545694 -0.751929170931848 -0.576682751449667 -0.50690258137024 -0.616242602405119 -0.669735048962354 -0.600625458920456 -0.535645597176996 -0.4608572199455 -0.138475042669414 0.127705587504896 0.14374307247661 0.285072910926812 0.318676666605605 0.198867177350398 -0.108620379442945 -0.216968608616689 0.250405031724245 -0.710396135033165 -0.738432487368584 0.187426295746808 0.0547083436420244 -0.317586561639279 0 -0.567998253878387 0.214942518957408 0.00937039786296867 0.40307109059387 -0.123040688734669 0.483033551530148 0.458075370175155 0.421887812557338 0.10845902073093 -0.0218549955873741 0.327014215945327 0.611287800273927 0.0318428204451946 0.325271644660905 0.126625131181383 0.126874745247383 0.13942958938786 0.591742959018812 0.713025154277604 0.67379301072514 0.706085699517578 0.824727774287307 0.779412554404956 0.659440716632894 0.761721993367104 0.871490071861799 0.651034500036927 0.311790056392288 0.698866710070581 0.805588734863904 0.645909196026348 0.016261933142573 0.186122376836943 0.758930377645393 -0.246208127696743 -0.470794971115709 -0.519670967106908 -0.797070330539623 -0.931851124215824 -0.938645575091494 -0.973928338077541 -0.971874935318557 -0.954297050321735 -0.950338544779678 -0.960261306045222 -0.956240413665137 -0.962091878916715 -0.964899927928199 -0.955905056575163 -0.955708504995273 -0.962279155272523 -0.938357594732143 -0.956179090371247 -0.963171784187084 -0.894850974558723 -0.890725587063521 -0.946042300857307 -0.913168691909714 -0.981410327114293 0.106922533076095 0.720510968416627 0.6029799300652 0.88400997947707 0.995196173726385 0.919304082555997 0.275261424682095 -0.51274512403908 -0.00343644737133544 0.155254292109154 -0.487215447855723 -0.558979330108729 0.0120228201665744 -0.366275411857991 -0.801173603473762 -0.640429554152211 0.125196013884214 -0.792034087792316 -0.868232544465862 -0.727655142744063 -0.68459046511158 -0.911435459060735 -0.897495267536959 -0.116169395408119 -0.749225668279482 -0.886202552922132 -0.579099886125819 -0.439191206451645 -0.691187825994947 -0.442535845399927 -0.215598888058726 -0.34363684972245 -0.429592880040409 -0.221376355970662 -0.323144525354582 -0.260869489398468 -0.362215061331426 -0.191495422187893 -0.533798837253912 -0.628415854870238 -0.215419126509678 -0.231584502105204 -0.125877655671781 0.176343150347845 0.0628689523919392 0.203260106587438 0.0450013524708494 0.185123789025144 0.386596965629235 0.724806090861171 0.533354457959859 0.59986721171826 0.564031167830603 0.450249072161996 0.312892004257836 -0.407052697846076 -0.678867499394695 -0.779267596546345 -0.710586925215009 -0.893450798234302 -0.881524528315342 -0.87006798718256 -0.874683956725891 -0.925275654701747 -0.90511906579568 -0.885687122463373 -0.943459850014946 -0.971208279844416 -0.963025208108535 -0.743448907770715 -0.451618174831645 -0.900521342557691 -0.910917428770343 0.692358802991511 0.2766748717429 -0.857262112180605 0.00273935801915417 0.884861959469331 0.437879338968492 -0.714229739851884 0.817091877532334 0.921236654216022 0.751946226475853 0.793939959193813 0.887314865284158 0.876701173303476 0.741136751753591 0.782867917043465 0.811475710799397 0.93661737834297 0.981144728648759 0.988957157872078 0.977703214016887 0.982795342003962 0.996214312345336 0.991737595925728 0.990893358949402 0.995163848248753 0.995601132116008 0.987014382125801 0.995726122859152 0.992313160764657 0.977988723579729 0.911456550911261 0.980507073381825 0.971671147723865 0.949629029509131 0.832810914495994 0.778293906599897 0.810375626107152 0.639155822186366 0.248054308095192 0.011761892130153 0.147153571018553 -0.318208872753872 -0.473886215251336 -0.330284443822483 -0.33487851865817 -0.662705404193845 -0.664577425678373 -0.714174189500386 -0.081208677441149 0.666991897035477 -0.0661096643268498 0.333684546135649 0.103444756149394 0.140955947527295 0.151882426248753 0.0311240819658507 -0.217402218148978 -0.0570568700685865 -0.0692726509136856 0.0418397168407503 0.168927982828794 0.0727732911740385 -0.103361420379951 0.562720450442261 0.741658743727929 0.142586258186862 -0.268919382905017 0.590988280349607 0.488874859974893 -0.154066319372741 0.137759083888265 -0.825817937037102 -0.898229652222978 -0.879473038387832 -0.882095070026112 -0.955394776845135 -0.989321017248591 -0.971574821219623 -0.342306374958837 -0.110471165578727 0.339879384322001 0.136216078096328 0.0860052924273165 0.0213949257771523 0.276484436800271 0.0515260625155161 -0.106004235123145 0.0772808752179655 0.144337758175731 0.504864777548945 0.400016239542107 0.132168393268599
-0.166829364804334 0.408686522083913 0.0780964553467909 0.33694337218167 0.083066279282226 0.529549414678931 0.289180738782036 0.011544815743823 0.201538652027102 0.502727560926015 0.375440436116271 0.0348986613721479 0.553477713441329 0.471312047828184 0.187721344010388 0.279804222934372 0.456380806715291 -0.226742827734898 -0.571086411526277 -0.742865807613825 -0.82773046469804 -0.823497854769636 -0.817536964263616 -0.806643747970669 -0.793424963939065 -0.840667366273753 -0.741939090086858 -0.71778651685755 -0.757989925716931 -0.824291749548014 -0.75472635646626 -0.737627522245743 -0.680142515419103 -0.204991373610573 0.0714112701140764 0.151068586041496 0.249316057994342 0.218845658215803 0.381156700826752 0.12608233800446 -0.27920047708129 0.368406538020087 -0.392558814622292 -0.704901152743705 -0.60412943470811 0.111932636737127 0.0958035762258892 -0.567998253878387 0 -0.508761353313485 -0.309564884003132 0.557380821379889 0.0626202046349724 0.619590909216712 0.620290004201566 0.273492742962428 0.016380864110281 -0.283892992915593 0.00979938302208135 0.360560685465219 -0.316091242332782 -0.130521312063859 -0.188065190462706 -0.124824878928691 -0.139217111882062 0.257417791219296 0.57538876677618 0.574058744870242 0.69303264049504 0.825017990579478 0.746387521519357 0.740396714905128 0.821298019532323 0.890700421781096 0.625789369532722 0.353453841499529 0.695553918893027 0.801901501556898 0.510164307216847 -0.295969909632221 -0.148867456427641 0.597393692013527 -0.528157980961645 -0.644159194188297 -0.821076895626643 -0.85865499111393 -0.928648003569302 -0.939133601138268 -0.968628624538046 -0.963951124028306 -0.931698171078964 -0.930748386222984 -0.941087801485903 -0.937358441765666 -0.950189480040092 -0.949653137221383 -0.943767596614262 -0.942025331217323 -0.941676035504423 -0.905224378101107 -0.936043734649201 -0.951185276494577 -0.839261457167928 -0.836851479963131 -0.914502652466962 -0.851590390513373 -0.976196105260014 0.206220192991203 0.720234667628806 0.591056725275876 0.866665989033246 0.994130814954466 0.931245025754166 0.578706821123244 0.0754963579311728 0.396571946186998 0.617442747217678 0.509352307019915 0.218893325013976 0.724485458000141 0.754432742053189 -0.444702105228109 0.0826049006071745 0.798628259494595 0.0546161935894734 -0.72256838656776 0.040879034025479 0.507563997546405 -0.846419201015614 -0.871176787018728 0.351759666451712 0.0340088780494649 -0.884699877697739 -0.639015076912325 -0.517685376232075 -0.699228165553578 -0.537230724276609 -0.288784803664415 -0.401598996714888 -0.472124599567645 -0.273333226685515 -0.398677650115778 -0.277844995640906 -0.385484221355297 -0.232560452467613 -0.546784813809048 -0.620507374291071 -0.171789021934795 -0.276281218270695 -0.173598731520954 0.184535869208653 0.0556219446654484 0.157488050367187 0.0405891765451686 0.229070184503828 0.407634680419106 0.720084239274269 0.439660790901289 0.553754511266269 0.505001561372228 0.328986380916208 0.257544125410794 -0.426299271818314 -0.70734832270911 -0.780777684217159 -0.683428152564326 -0.910381093723322 -0.900544605439101 -0.875556561239631 -0.888219971407882 -0.926202803763515 -0.909374820690464 -0.869695801991419 -0.944450339395067 -0.972590642043519 -0.960851846712012 -0.636000081461129 -0.363718533050623 -0.882991284564354 -0.882586758558159 0.721112283087786 0.301227646348816 -0.822984658837323 0.154235453287792 0.871591171627454 0.408925172755415 -0.661277502984161 0.818612870599477 0.916013209901844 0.753352077437241 0.819156332045572 0.895033156725181 0.879404768305499 0.757266801328759 0.801260606215679 0.824025813828116 0.945193938999034 0.982704243098346 0.989096039820712 0.978109334558589 0.9839050137997 0.995501391885539 0.989242620475129 0.990596044974414 0.994590970036382 0.993899197838362 0.979522662792002 0.994194217662065 0.990378666989183 0.966577773074847 0.843035796355026 0.973522289245136 0.960813787242674 0.892113301612885 0.661397454586207 0.716519723412059 0.742875806223474 0.468522369051283 0.0553167533911481 -0.111242134167494 -0.0535336235071693 -0.493498190616519 -0.548954788958708 -0.388580361248105 -0.474805207645946 -0.726608746519913 -0.70334336840639 -0.74897560514852 -0.245508133719261 0.621481955691167 -0.130675031213302 0.213286323570682 -0.00575718822189565 0.00523378852929135 0.0431933720859846 -0.189674989658905 -0.430418572068036 -0.25803839521882 -0.267038283836363 -0.304181072905355 -0.162461370645956 -0.147968907404567 -0.389378691512147 0.209469347536413 0.645135045872619 0.179509800568791 -0.158993176899707 0.581071085685397 0.614875846712696 0.109650486467945 0.283467416337317 -0.564508678188656 -0.666228445962498 -0.550853684611265 -0.618623851463499 -0.854688385761894 -0.986346480101327 -0.972777222205166 -0.626616450866617 -0.426757679186864 -0.33060386883153 -0.304285625203608 -0.161712891015012 -0.37621809259844 -0.218725309621452 -0.225057681500236 -0.302467040527646 -0.21366517292905 -0.0877166611646969 0.303350052863816 0.285345693816242 -0.0834729312472827
-0.334741813848333 0.135665196598293 -0.214336165817369 -0.0504864759906099 -0.322750329094924 0.0411145240438467 -0.158993391932937 -0.42802154241834 -0.327298377730894 0.110126090546226 -0.142736764149072 -0.492075772712424 -0.0728453808747166 -0.0234822760548282 -0.332427582959024 -0.278535674466691 -0.470173362667431 -0.664041043745701 -0.724247003117728 -0.77277210161644 -0.842160796757376 -0.838664455252393 -0.757114258216185 -0.723114847068408 -0.760971614909427 -0.80525234438864 -0.659503149356542 -0.595477927803914 -0.710745078823405 -0.779184258980695 -0.684261315332555 -0.667550738167991 -0.542290648742967 -0.00447473991814099 0.476982179221878 0.533654994094695 0.600572749086451 0.578961893123616 0.693725067132489 0.764091857950605 0.481929347060088 0.693049673908327 0.435259708003963 0.307903814387466 0.204177164447958 0.619485642203656 0.73544529278931 0.214942518957408 -0.508761353313485 0 -0.40978993885953 0.248724804427784 -0.580565274177704 0.642285358827712 0.428893183886339 -0.235285241062214 -0.467552738713649 -0.621066163358192 -0.411689404989149 -0.31646935266523 -0.748614854026055 -0.539695499004533 -0.62491158781102 -0.631953024827566 -0.535562588313363 -0.219395439208324 0.160049691200042 0.229168835885819 0.425480613650719 0.733150367579128 0.659628662202152 0.727858756313357 0.82404009624502 0.88456683693755 0.592145276176327 0.448376141135218 0.749518177828421 0.799014459732952 0.596513375073618 -0.0399437193430285 0.121653133245923 0.56972278422308 -0.116495980830588 -0.340700998690098 -0.763218322742132 -0.874785019903728 -0.887381659596264 -0.866554048689966 -0.946817012741235 -0.951973252231423 -0.86214928361067 -0.856984801480888 -0.911449617724944 -0.906641704463443 -0.913393939153664 -0.910888558066051 -0.902245494437366 -0.888245700113314 -0.915980799007878 -0.846158000501393 -0.901492499107419 -0.921557740957289 -0.762760281188973 -0.770336437265089 -0.890562367359916 -0.817137440628539 -0.976100755304709 0.272408302978749 0.374798346136465 0.049840966506647 0.845613486657545 0.99487251852988 0.932901521585366 0.800071273433412 0.470086524986832 0.47772353392186 0.715391448638429 0.781313212922775 0.666351371501953 0.815849443766497 0.885747059378343 0.607492774908365 0.70990919137606 0.889061511943768 0.746197748866009 -0.00747805698637156 0.680919871158051 0.770842352645745 -0.425609803136868 -0.789039797507555 0.573783605600099 0.497077154257867 -0.809220946665424 -0.393718882453816 -0.368507855728222 -0.587346401421632 -0.387572626862254 -0.105925844711684 -0.283667515469573 -0.352438720702767 -0.122245142896696 -0.286143610455167 -0.166030714089362 -0.330892570562971 -0.212590911726104 -0.535000592410676 -0.613441589331363 -0.174370426190829 -0.340749047278367 -0.235446818074735 0.184922740928095 -0.0730525331880735 0.0175150741567632 -0.0176302212447664 0.157044732502075 0.260706711078269 0.590215452422676 0.0471349317915842 0.438287999735201 0.420573373708573 0.232503497201412 0.341914210486755 -0.398399922519211 -0.63785687778874 -0.666289610882525 -0.497303840714679 -0.871367458919931 -0.862135577024181 -0.780568611961679 -0.837949346749954 -0.901321555239657 -0.877105646376042 -0.659856273094761 -0.900973945471802 -0.971955535559073 -0.941288477675637 0.372626127164421 0.408119244935126 -0.706845716801203 -0.617332316629424 0.885067135276494 0.728912629367896 -0.472901524804171 0.811116030730937 0.941223339124182 0.812086782731625 0.0496894266066597 0.929392805700706 0.948948555934169 0.88745775214219 0.905065365628257 0.917952746890785 0.923090656126797 0.853677338894733 0.852267213354111 0.849511950784857 0.952861266464106 0.984896356352232 0.98953838772222 0.981044937268268 0.98640252028101 0.996847977196913 0.990571682688593 0.991160915904853 0.995822740288982 0.995078640126515 0.983658214679559 0.995525223407458 0.992076822991624 0.967461925336517 0.866200610252109 0.979996640880724 0.968424259376994 0.892198821961395 0.680372641564329 0.804134868713194 0.815274786425753 0.559417422235831 0.22475430385902 0.17565222461015 0.139880078531617 -0.353768787009378 -0.514692522466187 -0.291393416895437 -0.452661730228106 -0.729725954478911 -0.674098811216793 -0.729020992566718 -0.28953299863137 0.616665031447775 -0.16558926522359 0.122446237539936 -0.0845385641782171 -0.0690490985106274 -0.088428291124782 -0.463980367961215 -0.566653875915082 -0.342764102050737 -0.453106653785647 -0.577872068600586 -0.280658334974162 -0.230396520146465 -0.590057119102187 0.0172289873728562 0.703971256356334 0.152628004607043 -0.170323827286658 0.609160991424903 0.645015714687607 -0.228113168081059 -0.00154418039163508 -0.792237029694835 -0.799385442302255 -0.716937507530841 -0.808157420164588 -0.93450637940283 -0.988849139638602 -0.975363174572252 -0.554398830238034 -0.385133771663026 -0.221902115102615 -0.254399355523674 -0.178605820913178 -0.426346683335675 -0.293968650895451 -0.348399770531508 -0.426852710172162 -0.382038031496999 -0.314870627678724 -0.0268637829932797 0.02042135916052 -0.238238232466259
-0.36231959010471 0.130237374278095 -0.318821834767679 -0.204317741650292 -0.401694230015116 -0.0409576856534314 -0.274053832162147 -0.4932723667865 -0.334832730527586 0.0230599921482734 -0.399509044667788 -0.593025494428588 -0.224410300635004 -0.318663648087537 -0.519961878714911 -0.542357254116951 -0.813216913803857 -0.830035427362108 -0.796882278220348 -0.754605352632365 -0.824440767357988 -0.782321315753808 -0.687595206434843 -0.655100035869664 -0.737706635345328 -0.772461048292257 -0.603403802733043 -0.580079077929296 -0.708595481453964 -0.756499925770686 -0.6793663349041 -0.62910067486193 -0.522686671754737 -0.11979650960282 0.211494769405798 0.265581175890795 0.363736559267953 0.306941090830758 0.369191531717882 0.322966207196766 0.0490317001453299 0.346429075425565 -0.125140438282086 -0.164504359399748 0.0483663533191451 0.205830323302225 0.403853621767947 0.00937039786296867 -0.309564884003132 -0.40978993885953 0 -0.438871014368108 -0.488241435103445 0.321557091681958 0.483919031729701 0.104462488122629 -0.139847044120407 -0.136061312121302 0.0520301175593229 0.117650644608194 -0.263355334127951 0.000859189438393077 -0.295956199526205 -0.259045429900369 -0.122892656895215 0.258331645474937 0.587476828232305 0.618202948084313 0.637632121323874 0.826593035946641 0.81793475158064 0.766626453743441 0.833926789765766 0.890865028877913 0.731439924640664 0.465418442296049 0.734996761469142 0.775000288890762 0.628431084364907 0.0333127413639599 -0.0399348567540719 0.535736414338849 -0.306246660053616 -0.539898172312056 -0.728474581419291 -0.924965165281713 -0.929164520157819 -0.92447959954957 -0.959999229384347 -0.966860723802195 -0.94941082161846 -0.925829084326466 -0.955096554406328 -0.956005805242468 -0.947941444445191 -0.936499477899024 -0.932771193409681 -0.924657246622092 -0.941884947519898 -0.919709456773509 -0.935782094710473 -0.946718252224175 -0.862261128914437 -0.878286693632743 -0.939047571635568 -0.919109887729566 -0.979450162811027 0.099779171974777 0.517040689602538 0.270950389960419 0.843456519662075 0.994121714463873 0.909803738709695 0.520833622789879 -0.158910594067124 0.110305199515493 0.30383871142733 0.0652516321766174 -0.0383400949119732 0.351348618259473 0.309931811264709 -0.556351549430231 -0.190097271427723 0.597411030692323 -0.450342847608292 -0.82170356318978 -0.236933739222354 0.0581949951046565 -0.913826097557417 -0.925013921279723 0.167175474758552 -0.205706160114252 -0.919483752236678 -0.646715703065277 -0.360161445178516 -0.56891162958906 -0.293492542136623 0.0239424715191998 -0.162870778663575 -0.288399879532653 0.0117714189492913 -0.14326224566552 -0.0647151783443391 -0.225935283014084 -0.0812758143891636 -0.441923440114603 -0.513912988910675 -0.0230246728769683 -0.170127594194923 0.0112519356494146 0.341870721739105 0.189836598353401 0.27260863283104 0.185584642781812 0.311763816195999 0.436887090446146 0.735547912703309 0.473684985638346 0.569533392089391 0.532856433137637 0.44552224130328 0.343465499327796 -0.237131155099794 -0.526810664347919 -0.628921735613853 -0.485303304834176 -0.834681132805698 -0.827207023337557 -0.770995434766186 -0.814326803553173 -0.896329779383842 -0.875152772454168 -0.820939935505291 -0.923476268574043 -0.970942804200282 -0.959976084886534 -0.471555513993159 -0.113126906367875 -0.845026543563789 -0.887438818657577 0.73023746164285 0.513064589777885 -0.774280052684868 0.349459494574818 0.899407920978998 0.638635581078096 -0.564967916546121 0.831289177083431 0.908339863587883 0.725679781489303 0.797692779634411 0.856604943186197 0.855887722302171 0.740809211646869 0.75146826423244 0.77176489891384 0.922358130613531 0.979478945233395 0.979691882131461 0.977057572622759 0.983781085075947 0.994651743806792 0.98054955722339 0.98763591006197 0.993194304227139 0.990265497194238 0.969154489418479 0.993331826571538 0.987381942195606 0.94249565162631 0.792259292813378 0.975979298596715 0.9597749763483 0.804296421235323 0.51728041997117 0.770949958187355 0.755669284588095 0.454279337941992 0.161399335974674 0.0478875813249677 -0.00319718468973751 -0.447228265359744 -0.496022059058982 -0.320051125881112 -0.490714860613213 -0.712208113193963 -0.65793735062125 -0.726275473956855 -0.20197363816506 0.646807103102743 -0.129907033018888 0.189740112992285 -0.0228282383017317 0.0167489767787484 0.0350155413712341 -0.285937748740582 -0.486423172824545 -0.25296496320902 -0.310805032629578 -0.464586284184495 -0.258277049072308 -0.149484805955881 -0.526577101759197 -0.0181839859421648 0.732691630525371 0.222168001568673 -0.12623388174922 0.601888742466744 0.648251336087238 -0.489227856890748 -0.364970742340351 -0.89228834753007 -0.862536621033339 -0.790957687931504 -0.874068040672124 -0.961478089688471 -0.990225416065744 -0.976438977052165 -0.320531925376757 -0.175882975498999 0.037391224411351 -0.0880139516037475 -0.0541253609715866 -0.267917472234489 -0.148370656429004 -0.253654474464205 -0.345064673572367 -0.333834519795529 -0.287132567768097 0.164906064912195 0.0783092545469524 -0.126825526085538
-0.406768283426708 0.0266738665390933 -0.360214628849871 -0.162632228308395 -0.392958750499842 -0.129290459804043 -0.273467449071196 -0.482924863744967 -0.396322233498684 -0.0539434008193444 -0.279851526442206 -0.531311049319421 -0.206292285932689 -0.205396042931394 -0.426598885490684 -0.343796588736917 -0.535032652066282 -0.590841556133938 -0.439160262206954 -0.248492216751218 -0.50638615786906 -0.473767249147 -0.208502629181638 -0.192767467231204 -0.424657097617549 -0.492052024113264 -0.287576175728429 -0.22726899116506 -0.440760944688844 -0.439621797777319 -0.404714881958824 -0.296128082827003 -0.184750224907524 0.21665682753232 0.390944931179674 0.386406192236233 0.425661052154127 0.446571387164489 0.55823731738219 0.41813720947078 0.25045522500616 0.56430818019969 0.232343544208303 0.0168760328831923 0.31227645608135 0.564368829480306 0.539404861598844 0.40307109059387 0.557380821379889 0.248724804427784 -0.438871014368108 0 -0.505767239598248 -0.384684872136873 0.259944800764855 -0.349973042093971 -0.391185827213004 -0.481568767059963 -0.365156942570641 -0.312239196651918 -0.579696085432424 -0.48810412945531 -0.544705906652188 -0.50669151119213 -0.469228677017628 -0.226307767123059 0.0991185342672927 0.19385096466759 0.523419988687143 0.775188822120882 0.748470671362381 0.747462055205832 0.897596274011803 0.922114205217814 0.628010274826979 0.217674144858695 0.658449851916896 0.655067933102398 0.0659642682114114 -0.549050814073777 -0.565221942063605 -0.0910306350724492 -0.595350383815295 -0.609731005608608 -0.718315268537666 -0.928613158660336 -0.924968499727782 -0.911797766854566 -0.95125277048878 -0.960779536606729 -0.938842116996168 -0.909254433293139 -0.949010889262324 -0.947217437779522 -0.930995031442115 -0.920758024579815 -0.934229780192917 -0.918680862926607 -0.916157724686462 -0.9095359838369 -0.929533111762657 -0.942036990119783 -0.834257198427884 -0.863811071574903 -0.929247896149686 -0.884016604132975 -0.974506051466942 0.301821568935667 0.825861407705273 0.787900339633057 0.870133080986379 0.991696387676979 0.91460162297068 0.603355197721249 0.32623846550053 0.499002140935184 0.626457037423103 0.48398869175819 0.385494394139378 0.684701563244681 0.698729567940756 -0.118015374985385 0.338420976046052 0.805446695245501 0.135052973631054 -0.694983887515482 0.241765590278853 0.459184347647484 -0.854839047638671 -0.897981847791313 0.304864512755573 -0.0544663966523455 -0.927224796342505 -0.764390672734694 -0.502118351586386 -0.631250760606215 -0.504001677449679 -0.236010832312434 -0.288927321080367 -0.430492486152624 -0.248232211529498 -0.335710342036934 -0.212996446077999 -0.393908054836483 -0.212282834852975 -0.571415453422601 -0.644644777116368 -0.261799294501291 -0.35499704571384 -0.248261234010334 0.145208080859356 -0.0502073351052669 0.0158713568707726 -0.00226894149369705 0.20802113866825 0.313831517556478 0.638005283558726 0.306361794975491 0.385153038174753 0.284038872769271 -0.0390257386871513 -0.133633444408721 -0.496794428932241 -0.687028205757961 -0.749166519026933 -0.623211882073605 -0.87017533935421 -0.869617515976784 -0.828222371758101 -0.850528574419055 -0.913585479383573 -0.897729158132793 -0.900791507849355 -0.940501493839361 -0.972268982955512 -0.96572591154161 -0.798326690790892 -0.552974127374562 -0.881746293454277 -0.917367815343449 0.437335291938932 0.237962408406672 -0.845834083626252 -0.284480910893951 0.836107828637872 0.397380798060124 -0.755014944783736 0.664315080485652 0.887409476789994 0.605093313293591 0.687518981976648 0.824519566331085 0.815347244257429 0.652396323909813 0.693927162661667 0.740530674731273 0.899794406210513 0.974620847324938 0.97037742312748 0.964947456186323 0.979579142080293 0.991710918700619 0.966171406234215 0.98347212755365 0.993229153339277 0.986933530906597 0.951760081365414 0.990459163578571 0.983886963400004 0.912439568015479 0.638511237987373 0.976021539848198 0.944932539046357 0.260231714821909 -0.176022533499197 0.534933795252457 0.439968720224632 -0.240115596623624 -0.431385742080301 -0.438671355621928 -0.549707621109708 -0.760834098599061 -0.612885634397132 -0.47986913826346 -0.694592409845713 -0.76283079381589 -0.728443019412514 -0.800878190198618 -0.43874495066468 0.498309197334818 -0.2589689376965 -0.0519645346237395 -0.248992930933862 -0.337198690686864 -0.221767186057394 -0.598878587719573 -0.734573256744785 -0.529885962265474 -0.520493458309432 -0.73428627653808 -0.690253722391399 -0.486455995978862 -0.731575320412681 -0.556629612702235 0.509444440286357 0.145280118835623 -0.14387536550966 0.797456749942089 0.850513384146825 -0.0293367063245638 0.0434728263540656 -0.61535053432376 -0.223076695022831 0.131527241753351 -0.257104191447577 -0.661148623682257 -0.967470853159645 -0.95177605522662 0.112016844220133 0.255495904172023 0.299370809973807 0.310136534080777 0.246860275959258 0.136346441557578 0.26489321428857 0.23160136362743 0.00301327185078939 0.0476335303380149 0.116675205797607 0.443144351469695 0.37968424082454 -0.0436992480853604
-0.0719072022905146 0.308423988265545 0.0990097077876997 0.310892532084901 0.0523803722534966 0.39338210339992 0.178645906721061 -0.128451807358917 -0.0980652020143325 0.451237112005427 0.404662558409161 -0.303244721280179 0.196406525343507 0.256875417263793 -0.225446955903547 -0.268091791885592 -0.602249939966332 -0.689063539174744 -0.589665674832926 -0.668480537128376 -0.789149005489356 -0.749998341555299 -0.71145364761755 -0.698424168883319 -0.748781790200223 -0.765815057032283 -0.69499297848461 -0.690232076475398 -0.796773621235082 -0.804960654866246 -0.742257333655515 -0.732886441720176 -0.642737752572425 -0.135216537244403 0.132972392698819 0.264829589561748 0.307913671283474 0.249583057409497 0.498486937582716 0.344398279097964 -0.1554911501626 0.39247672039045 -0.0762407242749673 -0.396583016677131 -0.351061810552422 0.200365239988163 0.383956041994184 -0.123040688734669 0.0626202046349724 -0.580565274177704 -0.488241435103445 -0.505767239598248 0 -0.53652407507964 0.525613508271493 -0.336318805633282 -0.285858349941903 -0.490544500656759 -0.477077283222716 -0.36584787878027 -0.665529549996114 -0.631161508459799 -0.666401924543632 -0.558043379752902 -0.516731573767306 -0.253235788680857 0.140155391893169 0.229018198620847 0.615246581336549 0.813673037552001 0.750396802941121 0.757518891937648 0.889192209651333 0.906612922245758 0.545868069042405 0.326200195888808 0.552482767202719 0.480560842607365 -0.0769835486787706 -0.55491449952292 -0.705089079882941 -0.385436725448529 -0.707264650787395 -0.773202499074411 -0.880232176025791 -0.929285968123316 -0.929915743756148 -0.904271216222403 -0.963749353971737 -0.971827548900004 -0.933880188145582 -0.916553128912752 -0.953014491918345 -0.950218111680984 -0.939539609806023 -0.936200731136968 -0.937130596948522 -0.931202184301237 -0.936779962846931 -0.906231993426372 -0.935145584188719 -0.941959558453665 -0.846404951915935 -0.856933161942435 -0.925244464193353 -0.862847735287359 -0.972990080774645 0.191447152581937 0.586238749692137 0.451947428857644 0.827478928594595 0.993604499186829 0.911513521613049 0.648805685995561 0.316514894653129 0.468865382101958 0.707589123859813 0.715850636772277 0.491081708743375 0.78155963531275 0.835737987757411 0.194855048570531 0.450716162482331 0.899741089489258 0.605894287305599 -0.471469896966485 0.46852042468043 0.817522783883066 -0.719744019206835 -0.863173166841367 0.469605709428124 0.382328986680355 -0.886592656180094 -0.759574101414482 -0.539152670344932 -0.581832496448914 -0.459635957159477 -0.202679663678961 -0.242454158904236 -0.33672149671851 -0.165585956639106 -0.284577709858563 -0.155004966937359 -0.287859675728063 -0.187086734862343 -0.466466965471663 -0.5163948837894 -0.0220299558995335 -0.264059778905808 -0.109108600797633 0.251924664782319 0.117668008174964 0.134008879630656 0.118755009099302 0.308441154608453 0.401918193709682 0.648296239206983 0.357856845320742 0.419154461984098 0.33075481838197 0.0380240780590893 0.0462967533782533 -0.363372352404762 -0.611781587652309 -0.665654449144795 -0.58941038543953 -0.869018509871786 -0.858571322032819 -0.813701675608974 -0.838423710024873 -0.893555737037039 -0.881492279933583 -0.807294932796511 -0.917803787461141 -0.964098261367212 -0.943713171801308 -0.546030495742075 -0.334624436374318 -0.824683830596736 -0.844753473722869 0.60664526074873 0.313480574137851 -0.800218999004457 0.0452826301290026 0.853147411175944 0.423140704575379 -0.66204916602286 0.753224645075558 0.889696232808366 0.655749035311982 0.749880929982538 0.842738479903529 0.831040648750032 0.704661328592161 0.742084534328793 0.766279184516731 0.927193208130465 0.982346993190372 0.980617283994614 0.972591624580993 0.983889102213775 0.994967808699707 0.978752513670634 0.988886543857127 0.99540807674513 0.991893188693041 0.965999619390478 0.994720610850305 0.989956371567035 0.927939813079599 0.642213852128329 0.981007813705475 0.952364225745002 0.353346086299971 -0.160170628385089 0.599100283931814 0.528279742392485 -0.167524829263562 -0.315220087131096 -0.334284796622669 -0.446911377419139 -0.662794594944614 -0.625865516418308 -0.478773257906213 -0.669193282445567 -0.761886548850655 -0.721606502022072 -0.776449590314041 -0.427595453009411 0.475770037282846 -0.242024918079534 -0.0639047523470126 -0.22698579994211 -0.260390018830785 -0.167704022208632 -0.625214648471617 -0.736393581128147 -0.530334804414206 -0.558990855194728 -0.786581592892198 -0.683340964010909 -0.474534102843428 -0.76528840179029 -0.566841925917368 0.521892244332089 0.263549568981875 -0.0530329600363382 0.699101406062099 0.76730453043814 -0.202692326357611 -0.189096773186711 -0.750574321796651 -0.449145176051164 -0.0915232114553051 -0.520090589062307 -0.754972275641964 -0.979272221020382 -0.970049939105751 -0.488665114939348 -0.343549664731841 -0.411712958307489 -0.335006743380254 -0.187539413077254 -0.408221808663475 -0.345075610159274 -0.286833080527995 -0.345393899081404 -0.379584047996669 -0.322333212934238 -0.104316830500024 -0.00977663344698568 -0.303252590932259
-0.500323685309011 -0.202994086275753 -0.537179986420178 -0.496775863497329 -0.576759106523737 -0.485637886268593 -0.593423934677966 -0.727700790025004 -0.726509009452973 -0.325260738530508 -0.611775465013066 -0.764086017195067 -0.631259000555882 -0.455466904203597 -0.588514924731485 -0.481623523121612 -0.646983862738471 -0.707038202640224 -0.567601561925065 -0.495163440308119 -0.665960394292693 -0.63690220902968 -0.401574398784626 -0.337877659084268 -0.607681313770018 -0.63428315768774 -0.41406644834111 -0.348775590980889 -0.605261067175568 -0.635312674392344 -0.500418958989925 -0.437801394300223 -0.247469672823889 0.347114660941648 0.645215310803221 0.654014874375327 0.648884200555363 0.645213139627546 0.785015439230338 0.761878205535973 0.578941212365929 0.734441852441791 0.636429575449368 0.497297452826884 0.498405126320322 0.717352940515141 0.732255193256103 0.483033551530148 0.619590909216712 0.642285358827712 0.321557091681958 -0.384684872136873 -0.53652407507964 0 -0.478492711870449 -0.854733697984171 -0.821602964472316 -0.822849646386497 -0.799629354337518 -0.856963738337695 -0.913927903319362 -0.853366899389037 -0.893170534895068 -0.915047372440108 -0.86686234207095 -0.685453504734149 -0.652811950312989 -0.551775701896873 -0.00942021452701705 0.652593975820215 0.579536056632533 0.703671994521701 0.913672612178339 0.923715346148893 0.382284679727215 0.401014707425058 0.689056248007802 0.480561528557137 -0.00741693398513073 -0.0837395942318149 -0.170325506458857 -0.17612335189769 -0.29507657126592 -0.232515219836243 -0.713248862635368 -0.818413991918155 -0.694343830114177 -0.678059539124293 -0.875504306752753 -0.895727629894106 -0.755620736766162 -0.728765942141444 -0.855306791919586 -0.802519803337854 -0.783937126256177 -0.792233753798538 -0.830260685408833 -0.785570657944197 -0.766523143415949 -0.713077258789409 -0.804718369646674 -0.825060736559656 -0.604530116972163 -0.663611363455475 -0.826197009631673 -0.694115346737312 -0.96573815708033 0.372755734767848 0.490662982253657 0.252360366893113 0.845336866247647 0.992724178390931 0.914096523971954 0.808047653621045 0.656944046066773 0.618614383909472 0.759388309458569 0.810575376138485 0.755031934832598 0.814089276845408 0.880305863840729 0.793739596816778 0.797316083613939 0.916771750065261 0.828904197466877 0.467585081169766 0.800605442304252 0.907819028370899 0.153389047353444 -0.54725702234694 0.762620632678137 0.714309029344079 -0.632049952071279 -0.443855256172258 0.0087593254489343 0.0348060746860357 0.0569599094626844 0.179843270346854 0.0491926767892698 -0.0306655750977686 0.0848195645598068 -0.026311166131142 0.0126530021877156 -0.196360183344577 -0.171673142776454 -0.414418659081217 -0.53485854972696 -0.183497433208658 -0.451119495229444 -0.290661652288994 0.109104425717672 -0.180368858609433 -0.191822055371838 -0.0358689922984353 0.146712818156715 0.110507162184327 0.465844932914064 -0.347899613638718 0.056282027929083 0.031325258028776 -0.353274095315349 -0.0504242820166353 -0.395089929110578 -0.486234676246921 -0.479080057304735 -0.374894643417442 -0.720832423996666 -0.702607924408859 -0.673417316512326 -0.659403509806513 -0.742392069546312 -0.724436780292508 -0.437986094152514 -0.675871887038924 -0.888024117275707 -0.780945220214069 0.377073947900263 0.382747910870292 -0.284743403553293 -0.320827684031717 0.793114699339371 0.668752001466925 -0.134998127378379 0.662198970484189 0.88892665844798 0.709885084659234 0.151898569707 0.88655960369575 0.926786659934016 0.802167344783679 0.872347569323706 0.909197937802755 0.899901410931329 0.820571792059922 0.830064368106635 0.830444699271412 0.930872768051175 0.977403891578719 0.984453636840346 0.97237814587157 0.980009299907769 0.993363685826444 0.981601027393283 0.98690469727053 0.992841192006128 0.99087739098942 0.965333550357924 0.99185236089051 0.986807497449416 0.954827581741467 0.77932198931356 0.973376069606048 0.956127903782934 0.584711860026078 0.057963682291716 0.734302821827939 0.690496648486333 -0.0546280996474237 -0.217307738925853 -0.0614103871923423 -0.268833001338941 -0.602295429868706 -0.561838608961449 -0.384553992626896 -0.621504797249649 -0.738406371101453 -0.687634591636518 -0.723654784721693 -0.484053279736399 0.435290387584144 -0.309199500460703 -0.2608721618185 -0.34533863766072 -0.413504289302008 -0.417371132531356 -0.804487003102704 -0.818820726931805 -0.640388489567977 -0.734147747335884 -0.875401336084573 -0.782389721889058 -0.672932219551529 -0.878775955357252 -0.67577220602861 0.472846599762809 0.185948828693026 -0.131628582583904 0.604664536089285 0.762410783320909 -0.332342171362401 -0.212254784090227 -0.790655604798848 -0.539484909763449 -0.270253255178027 -0.621400946882101 -0.870803341975998 -0.98145680623303 -0.962347430931038 -0.182824825120079 -0.001441482477245 0.0985252808248018 0.116059754213677 0.0586113812366465 -0.125769153302643 0.00243088553629378 -0.0625467866383787 -0.243530195103631 -0.21896547363166 -0.178498188787718 -0.0461077969949251 0.0309914598613263 -0.299661077109942
-0.37800432524834 0.0365618673485673 -0.356197762075093 -0.311043842604816 -0.411620815415941 -0.120455925486129 -0.318054621826893 -0.554786785301561 -0.466717811858577 0.249967306675121 -0.228812396716216 -0.601168012413107 -0.0747988198755261 0.0152412966992761 -0.211985338456771 -0.219942857778477 -0.440228495250418 -0.509587757363375 -0.416426003763447 -0.415377172318769 -0.653830133004133 -0.585169226741701 -0.302703776547506 -0.38898100288871 -0.592977919816926 -0.639596924570357 -0.483315131021421 -0.443663672241613 -0.64433972999435 -0.631030547239995 -0.545283461325114 -0.417452449879275 -0.269760654026456 0.170981290083415 0.546621950771077 0.537714244065324 0.551461943392211 0.586081070239597 0.733652222596694 0.616581690551192 0.425117533151096 0.621525651545709 0.272653728054162 0.224125743394488 0.462234740452958 0.571096515006447 0.596934459881856 0.458075370175155 0.620290004201566 0.428893183886339 0.483919031729701 0.259944800764855 0.525613508271493 -0.478492711870449 0 -0.435574380706745 -0.108914055451067 -0.414232058866754 -0.556995506823027 -0.444563042649347 -0.612626723628984 -0.541798617039288 -0.751089368027889 -0.726548673275186 -0.492941720763896 -0.260827111670851 0.14022334778722 0.318381557439215 0.590022515530015 0.773374118259349 0.729306242517243 0.676640881108541 0.892546868767998 0.939422632437367 0.619599997545805 0.0194016615985222 0.590133118005348 0.620970272906382 -0.369466717721969 -0.708560627840776 -0.773148899728118 -0.747608880090134 -0.775788620843117 -0.810561886832639 -0.87415955516455 -0.917616140061265 -0.887259049675114 -0.898073614010306 -0.950838919550131 -0.958803593121094 -0.926052194249534 -0.913065208595227 -0.94693417091622 -0.92738652218938 -0.927964099204977 -0.910557529509449 -0.928422945729798 -0.908970478144718 -0.896615668373782 -0.870735518782961 -0.917148491766049 -0.92839949619515 -0.795905948480967 -0.846881544556374 -0.931082430745918 -0.883039256903479 -0.974567959027862 0.143516859126549 0.359136790575787 0.0919227083635928 0.818517995603815 0.991405543312767 0.865097785250582 0.585052536004506 0.119550242702672 0.273992451573931 0.437204627285859 0.342465743897275 0.275824869820632 0.505118638245878 0.51966748732361 -0.255907566662538 0.0934155556241889 0.709540472905102 -0.208906001509804 -0.737323375114125 -0.0529509307218861 0.282091949117582 -0.908593233336037 -0.913911460987851 0.0296861352194631 -0.250038217760878 -0.910352621606288 -0.832923136514486 -0.576530223265855 -0.580744122240254 -0.496009940979213 -0.298337835302273 -0.283189386675499 -0.44068102939883 -0.297733943868161 -0.323158217615653 -0.202756295467124 -0.372586429102677 -0.251328663159338 -0.557034785701014 -0.629469039658879 -0.289123474013811 -0.409446142140226 -0.315427858091747 0.0273812605724514 -0.171142528196999 -0.113761431824239 -0.0892540360143004 0.102371849464137 0.203848769491889 0.621536582534645 0.171346299882516 0.317832471088168 0.214409876253409 -0.18064761839021 -0.200409399346759 -0.517563375534252 -0.671059249946248 -0.69775618571721 -0.595276393251603 -0.826744873933025 -0.818914328999922 -0.783259815439796 -0.779654303868847 -0.850183300603659 -0.847421937686055 -0.732685086313174 -0.835054336632402 -0.935723674674689 -0.903633364958928 -0.286391738971172 -0.140298767918412 -0.653481011809293 -0.738616945611681 0.614651538300265 0.467062967778235 -0.620413505108427 0.288907357715592 0.835053782075313 0.553245941788376 -0.387661813546885 0.786716353920339 0.884475297875909 0.663486827304484 0.767911543453025 0.84684019132348 0.830694225029997 0.716131951268286 0.745550595471141 0.759743850761484 0.911601987535806 0.974713251840194 0.982125102469381 0.970386471855232 0.979598814569417 0.99133282266869 0.970693080152818 0.984627125511276 0.991874109697269 0.986118620152153 0.946248253270543 0.989794650394133 0.983979744913772 0.916723730879889 0.70115254741446 0.969758701571253 0.955665551063659 0.399077488712587 -0.00179539943131865 0.683751145528133 0.595133743233158 -0.167680817711726 -0.315740032962265 -0.319467078620465 -0.464742466610158 -0.659547919583471 -0.613717009419718 -0.485805296121259 -0.678830330198739 -0.751028271280135 -0.72105008617116 -0.759400632724824 -0.517861050184339 0.413440939713853 -0.293901581720787 -0.222847246218794 -0.315252922359696 -0.319132210494064 -0.309291996064435 -0.704553413056997 -0.761350593706458 -0.594558644506166 -0.657067259131646 -0.812980726877443 -0.737474745534676 -0.627519919749317 -0.830221863857808 -0.562363127304025 0.463251421424974 0.420759707362863 0.245156901353112 0.674058152834776 0.780172633094408 -0.192583598900809 -0.186326475875394 -0.884642607036891 -0.671068577208343 -0.298427728162159 -0.788895683131974 -0.949912216131718 -0.983978597938774 -0.964539313044853 0.173851901521917 0.345427892968214 0.465675516417979 0.441217205612457 0.344915163168454 0.221458588917816 0.325771993144414 0.298464092761884 0.0575786651266301 0.063889584519907 0.0978323411036187 0.406651755441709 0.376770837141814 -0.0745075083175546
-0.321603180792673 0.140986817569716 -0.405743761504323 -0.253705296725833 -0.318071806794557 -0.151475148348306 -0.421419882023069 -0.549367450299187 -0.446367322956011 -0.0180216877798952 -0.469954359395126 -0.647717302436113 -0.48415985116256 -0.542496360139628 -0.446317769441081 -0.424186635430391 -0.726683933685902 -0.764317418851357 -0.440143175411212 -0.495899232498426 -0.783159401341381 -0.735586412776109 -0.482062090250939 -0.582245099780575 -0.674380143549483 -0.696628684470483 -0.600652089342773 -0.599290083537934 -0.722857732781414 -0.643592325641328 -0.639578321860687 -0.466033826765372 -0.367158532382478 0.0370879745716777 0.342737077960803 0.383532937370907 0.432502454660337 0.478962797647923 0.60352422478435 0.409277023572577 0.196139128676871 0.4990459210758 -0.0310380132831196 -0.117279599845007 0.263356383518536 0.42735892824691 0.568069381803716 0.421887812557338 0.273492742962428 -0.235285241062214 0.104462488122629 -0.349973042093971 -0.336318805633282 -0.854733697984171 -0.435574380706745 0 -0.518706325007905 -0.0960259224909231 -0.136331697386891 0.0735484226495675 -0.296329862923845 -0.0337604255572899 -0.400802756757348 -0.378489162799933 -0.141125335649463 0.177794487374168 0.545559256305659 0.641057865286902 0.741206687253736 0.839445618223208 0.814797005287957 0.738141219123609 0.857470012442179 0.910093587535044 0.71166683151912 0.139884349184531 0.530896901577279 0.649959471020757 -0.0735214291291674 -0.634612048639721 -0.7641017203395 -0.615922377572631 -0.684407876640609 -0.778118518072536 -0.817413280297595 -0.943851165610855 -0.930499180152499 -0.930974465527163 -0.96879058293647 -0.97643454254936 -0.961601878736857 -0.950608330494127 -0.972127070040498 -0.965283945159449 -0.957386517008043 -0.95055842711341 -0.954008247133776 -0.944851595599659 -0.946021390798101 -0.93416749090145 -0.954907074571298 -0.954499932423734 -0.879431568180658 -0.907994297770552 -0.954749672604974 -0.92003213577076 -0.977646024548595 0.143425433146309 0.713662631876063 0.638851289545136 0.876797582182959 0.993427733158735 0.901531400996538 0.45507089266858 -0.112756979966487 0.226818059376961 0.400706525937237 0.0383819636427208 -0.0439574397580346 0.395789158091889 0.257789754213023 -0.630426929798398 -0.25381018686903 0.543406311390514 -0.643732630957874 -0.858830075425129 -0.448110043810608 -0.239591132293571 -0.944282039076511 -0.937844735529822 -0.139847245069946 -0.522826371550288 -0.936760880652486 -0.866236365539637 -0.570989820445044 -0.578280933337006 -0.358307716774214 -0.105427803225255 -0.216800678696964 -0.390121909358015 -0.0985111446809915 -0.154165706846163 -0.00825169580088862 -0.219347138611741 -0.0331677991043444 -0.437351536384808 -0.494685714337535 0.0121421795661143 -0.127218285888131 0.0795814479932223 0.408546777411933 0.263968389068687 0.325694251303042 0.235750485991259 0.389552279330322 0.521609990720189 0.818271361310337 0.613232117220586 0.603523007187584 0.449971188146502 0.266515545608679 -0.0293841170088943 -0.236951041261857 -0.576613456993197 -0.646139800306182 -0.34892483102635 -0.820803959489304 -0.837875051512917 -0.760770742818252 -0.786745624492667 -0.903539506338929 -0.900531280012092 -0.815567806548701 -0.884024225520416 -0.965405847348311 -0.955387820212455 -0.745112113569757 -0.440261018406939 -0.836906220300792 -0.902706513341178 0.2830043505751 0.320935794760651 -0.831302563230315 -0.404429121549279 0.791009101210918 0.439524639727809 -0.742660260365844 0.453491477391825 0.842798114439903 0.504693145223474 0.555659760140708 0.746312605293788 0.73789936579906 0.557534103974533 0.598440351619984 0.670486408444345 0.856257048445443 0.969555870285857 0.948979032117152 0.961358551538603 0.977206093948553 0.98320748377128 0.922062843419717 0.980472905679345 0.987170578852039 0.964629805776256 0.849203134262282 0.985022715235709 0.973701099398582 0.728038940454543 0.339570491592773 0.964823809320196 0.90862599322489 -0.346770647981621 -0.27628203457512 0.629886596297064 0.453560904563416 -0.211112705665107 -0.178113914717868 -0.242245383047108 -0.396515657021525 -0.639642201326038 -0.516873411778966 -0.432387779136858 -0.63706844659842 -0.711394935421904 -0.673985325497808 -0.745254433231927 -0.301450943941723 0.509932768856663 -0.204508107792179 0.0483629822760159 -0.133244845901535 -0.166586802025281 -0.0441640022677901 -0.446864098521042 -0.683811937046026 -0.422670725583099 -0.439885172740542 -0.789814824683474 -0.650498778217807 -0.279491296501984 -0.789595188026682 -0.615309156033155 0.692438156965489 0.806642322357233 0.607855941661879 0.846236984591644 0.825013511267482 -0.11099525694907 -0.125736861885312 -0.792763880852901 -0.412211756067351 0.126697362936168 -0.428541313824647 -0.839892641347966 -0.953092769482933 -0.925124239571864 0.355688376545568 0.378997128865597 0.415296079550895 0.381531101990655 0.325958062976822 0.122638804317482 0.177240416512835 0.140967447451156 -0.0596653829233574 -0.137313875596051 -0.112799391810898 0.287880853873881 0.19773614517424 -0.0761472049224853
0.0739177158995243 0.405847291850707 0.111713848537643 0.317084975816802 0.1963717569762 0.408263346290125 0.0766011883761108 -0.0345746351605591 -0.00138901422901433 0.434541007157438 0.161657192595668 -0.226108868333555 -0.350261954428256 -0.476779710056061 -0.336002482294405 -0.387959013741027 -0.724775330007683 -0.754114168069529 -0.464483440595525 -0.622810021693955 -0.811616384474385 -0.78618854997374 -0.661401909593975 -0.726115097518951 -0.745980989383016 -0.758362167719782 -0.711495225620046 -0.70058821066468 -0.802631471636563 -0.741310440164207 -0.741517484299804 -0.653187014085946 -0.57546447348159 -0.160756435332292 0.0414665362320394 0.195546876731661 0.272502725778011 0.228269112942366 0.385566397171001 0.176880214225496 -0.166830183323148 0.260382199935793 -0.212941631500318 -0.371286047620262 -0.142910480181852 0.0904754616543634 0.347990957680627 0.10845902073093 0.016380864110281 -0.467552738713649 -0.139847044120407 -0.391185827213004 -0.285858349941903 -0.821602964472316 -0.108914055451067 -0.518706325007905 0 -0.515685763044493 -0.686795483245362 -0.210387790527346 -0.37156521788219 -0.308513500620696 -0.478579990370849 -0.34288468559985 -0.161406587305369 0.0411650828870757 0.499077701870254 0.610659167831825 0.808304597697592 0.893672028043168 0.877585534864605 0.813877660600058 0.925011996122455 0.934795068288491 0.652573194402439 0.195383572614502 0.41661052854357 0.369918336049976 -0.463699321386367 -0.765181181011286 -0.85311570108463 -0.743394030959421 -0.738694177321985 -0.85432992424493 -0.871205154376557 -0.937161884322043 -0.924900523354984 -0.923956556998158 -0.966086597548808 -0.974685381995153 -0.954253526768965 -0.940724417548365 -0.968614800394704 -0.961127962002872 -0.952609916248987 -0.949804138587048 -0.952971480886822 -0.942828016853327 -0.944819638578085 -0.93518635257945 -0.954549767272071 -0.951318534417259 -0.879308255906372 -0.904728220845824 -0.950191748744458 -0.909589860484197 -0.976031368884496 0.118249811381924 0.678362335113648 0.601673934409094 0.860380600557431 0.992721204434033 0.889743813046333 0.44934504113828 -0.0452671647323365 0.245179933915299 0.527482745048142 0.280862521024702 0.0423978155437167 0.471425610698429 0.504552452633995 -0.441574407324752 -0.120729899624036 0.680566837474877 -0.244953769021926 -0.759447209339613 -0.165035226041653 0.347252142348242 -0.918326105898588 -0.933824032605313 0.0245350950685434 -0.141022098071742 -0.931262508277601 -0.85898938607316 -0.614138838238915 -0.53926596480214 -0.463713833575755 -0.132623659247319 -0.205473049832673 -0.385444941106302 -0.0602496151884992 -0.139688189697159 0.0576679236158324 -0.126911549803926 0.0277541545414642 -0.298382458801251 -0.343931916872768 0.233382003265434 -0.0225700711521296 0.237960056899039 0.532992718421775 0.443673033402961 0.449983048714539 0.405184821087753 0.561899518667311 0.653437030963722 0.822832588645922 0.747569561074364 0.649064217651899 0.486782144175812 0.223208616014879 -0.0148856435481567 -0.0233562799479306 -0.443604132466409 -0.513323391910376 -0.205954469539957 -0.790900476983062 -0.798841911749772 -0.737310865785175 -0.766707476184178 -0.883963447792359 -0.885926223123866 -0.773710791568008 -0.865102296007229 -0.960748772105656 -0.949040107984114 -0.709289735553975 -0.450132439208066 -0.823487044709743 -0.898621398082549 0.204369073871132 0.225510704388566 -0.838827394517088 -0.464913011654655 0.733342545054496 0.302025511761422 -0.771425451259727 0.306955158806705 0.793875120057513 0.383806949694354 0.47631510668516 0.695404931875848 0.675050773897331 0.491708021046269 0.551447945868976 0.634205135985665 0.851707353311115 0.96865585689898 0.923962505340639 0.952655054762663 0.977227165698849 0.979372728895997 0.86903610998925 0.972769461827801 0.985037835354716 0.942080734819016 0.712346918521522 0.981510725596379 0.966466212320942 0.480545070939603 -0.0339209918744204 0.95447688280702 0.852266549009663 -0.63531906657129 -0.499270553238402 0.484275024756648 0.238741180626056 -0.469096527257245 -0.293025494765827 -0.296769651076497 -0.453565300778163 -0.649455658368979 -0.538822827770155 -0.461927536113694 -0.675443391949872 -0.72637962929849 -0.686390140967956 -0.754665033335711 -0.322977292589861 0.44873512671735 -0.222909430057486 -0.00709049109741563 -0.163813354553763 -0.200782914748505 -0.0211247366398487 -0.467476616719416 -0.697451707276439 -0.481792214570229 -0.509650157567 -0.79457700582747 -0.693673936203322 -0.314443308800267 -0.745495260525503 -0.630808445679932 0.461774922854573 0.726607559832108 0.562735531097439 0.787527769349389 0.827977983836497 -0.0774330017106905 -0.160256798622775 -0.769908863119803 -0.211859092388388 0.359845986542417 -0.172128350696404 -0.62737375347305 -0.934962151174871 -0.927192136247499 0.0294910912652726 0.0647872136949099 -0.0875365271604673 -0.0243666471501366 0.0642491191212998 -0.2063387664963 -0.216335521981977 -0.152394346969964 -0.260757003447528 -0.396590151348903 -0.384699084680549 -0.0876259200814842 -0.0564008879551527 -0.262100302581787
0.171756310656639 0.441320666485479 0.176558708680978 0.301549190772432 0.218024522755296 0.405507968095563 0.0577062573259419 -0.0156774895996526 -0.00722260615711453 0.381641445211959 0.0531474652675391 -0.311441146100417 -0.421287871382423 -0.541293567771007 -0.393819104905022 -0.484982965910662 -0.78330861706251 -0.788488586643378 -0.545091019558333 -0.680647085620323 -0.841511464803841 -0.810359400758864 -0.711531370981522 -0.77961877313159 -0.785196504916195 -0.790979545389037 -0.744867444994863 -0.755992080659309 -0.824322993886392 -0.795891154639984 -0.779845372173748 -0.70634335103148 -0.642457142506706 -0.327323405706064 -0.0199170943629413 0.170477357632989 0.289882026986524 0.136051701320843 0.215420675747084 0.195763444379887 -0.150440516546342 0.0549280201605538 -0.290949148760086 -0.27864533892672 -0.231108635542174 -0.201991420880055 0.217050879234595 -0.0218549955873741 -0.283892992915593 -0.621066163358192 -0.136061312121302 -0.481568767059963 -0.490544500656759 -0.822849646386497 -0.414232058866754 -0.0960259224909231 -0.515685763044493 0 -0.471050286961042 0.0013299357526995 -0.279975629581323 -0.172564671629429 -0.352570366704123 -0.278797396778279 -0.0594288491718955 0.205416987563629 0.669219283718031 0.752225023655569 0.78770807406707 0.879702011579775 0.885806921894655 0.823675648504521 0.872795286200159 0.861957060503901 0.687527741612461 0.152897513374895 -0.0788544686559931 -0.223215724673879 -0.602125309158662 -0.823085551398598 -0.897949252535435 -0.834079831926382 -0.722451156545868 -0.886908391352601 -0.887148367895078 -0.941462974182931 -0.920824604111198 -0.911682054242096 -0.958304438211975 -0.971948678751571 -0.947612045957629 -0.931895725301582 -0.965220186351724 -0.955748073849038 -0.943163285854199 -0.940062944314735 -0.942579956028554 -0.929383633626321 -0.93402204854194 -0.915458467886135 -0.940941685712183 -0.933691644465932 -0.85742231992533 -0.888423959394684 -0.944378526890598 -0.908271023809961 -0.975994621973396 0.0414776028104534 0.362280044469592 0.151656792546289 0.81272900161809 0.991808152345634 0.860641383980128 0.440591308306061 -0.201507018121221 -0.0192027007320794 0.223349351342729 0.0798636394385274 -0.101062832651338 0.210376620686611 0.285760599042539 -0.440556455379274 -0.248074994149661 0.469283998034119 -0.301299144063207 -0.718030626684626 -0.267758258285477 0.191854188592518 -0.886345659743175 -0.931586322675151 -0.109704578306789 -0.102562298880002 -0.906448027236217 -0.846711648281718 -0.583786585428485 -0.371877057469219 -0.294726044965785 0.00402493715882463 -0.173121384471088 -0.313738681283599 0.0484185952972816 0.0154944908922016 0.251853451803258 0.0597501337561342 0.201361455482046 -0.0917837132884198 -0.0644351211423075 0.4740113915575 0.161327431218437 0.440700486739606 0.649133946550736 0.577903071789645 0.578245591310866 0.52518664180419 0.625397042890718 0.697210579549397 0.832887304056045 0.777351832153204 0.726706589145636 0.640365755542796 0.519158556517133 0.388129647615763 0.445262412953503 0.126174805703313 0.0955297720251038 0.278685194745057 -0.5617267102607 -0.609402648201763 -0.469183818064392 -0.547452951994039 -0.762162168984302 -0.790506579234377 -0.504633939566625 -0.727507965281823 -0.93563539223252 -0.902285790306692 -0.176645275042791 0.136216075749212 -0.603677342352606 -0.797022037514612 0.627608513436441 0.60675357822167 -0.653517709251912 0.088401680043307 0.843954253209011 0.63335923642624 -0.523103581251343 0.6412277203931 0.858618186918817 0.609881286598125 0.644563983878953 0.752689001524327 0.750934966373572 0.613036209048973 0.628753285404873 0.674447407033731 0.871141377439251 0.970855113648261 0.939737331455858 0.960882944641331 0.979516528148616 0.981518773343312 0.912380854284828 0.978187156647406 0.98798010120189 0.960915802598854 0.83404404577684 0.985033765900754 0.976244063038478 0.712295872979951 0.364127411465039 0.9661117351536 0.910738507950912 -0.254948292668872 -0.0961414468066636 0.756369328397405 0.674994777208082 0.175942888870315 0.358113145301667 0.222508918696324 -0.0546288445542817 -0.394545872892188 -0.357317143003602 -0.275392864988787 -0.58561071103425 -0.671663499909537 -0.620189396532224 -0.687720162150826 -0.110672581305416 0.539187378577849 -0.157820044171976 0.144379558238227 0.0334782203787768 0.16124254311124 0.19751760261016 -0.223586645124793 -0.484519388890895 -0.151141092887589 -0.222587180606382 -0.605362812379437 -0.373020359569631 0.14518743111027 -0.506673796341031 -0.363828231551796 0.646901316014205 0.780136084123944 0.658081547002497 0.828827810022431 0.801846979725243 -0.144356990009423 -0.152667819120734 -0.826126748023871 -0.466981965156991 0.163956228002619 -0.449485380117485 -0.844301733720437 -0.955740535005923 -0.93409830474842 -0.0422612812701748 -0.0193991825645847 -0.181527476841996 -0.152146591380332 -0.0141412791192603 -0.316134518956565 -0.371224190275642 -0.298281108203232 -0.370205378052388 -0.521740802282888 -0.533701699024142 -0.277391283388521 -0.22294330416804 -0.337166918535049
-0.178216333113196 0.166953784279289 -0.429256506849219 -0.251596334905838 -0.148494187052332 -0.280716470207438 -0.485049239626574 -0.415285715896413 -0.363344951908096 -0.108573372634359 -0.390508938858749 -0.429099443425184 -0.418317111228645 -0.523460046912726 -0.33212251012154 -0.334101516757175 -0.726803612243621 -0.742362822714191 -0.41118703963915 -0.532664746484039 -0.802113247549933 -0.756920697106445 -0.512714035586932 -0.636187628726701 -0.731257362346132 -0.722886388216262 -0.661997453725901 -0.669828382300536 -0.770690638114066 -0.688875935364923 -0.666557217417225 -0.525618233095958 -0.418252700895022 -0.0508776671059532 0.309488775955974 0.399536606496799 0.461801792971309 0.4469038720307 0.495833261802556 0.406372645857913 0.237257276953811 0.363774170656099 -0.0687869800006312 0.00551898037540315 0.209247639280791 0.157102301010499 0.466959342592713 0.327014215945327 0.00979938302208135 -0.411689404989149 0.0520301175593229 -0.365156942570641 -0.477077283222716 -0.799629354337518 -0.556995506823027 -0.136331697386891 -0.686795483245362 -0.471050286961042 0 -0.541151597501695 -0.335352991335059 0.0666383569717647 -0.365739658261446 -0.423425706119944 -0.140449603628205 0.243046921288544 0.507241388303703 0.490216109083032 0.626153308211254 0.745929619007647 0.662313443898841 0.436276797953209 0.552795860655469 0.680920793697954 0.361702699378251 -0.133764612520417 -0.171894478511474 -0.131674661739137 -0.435658612565279 -0.663930269598159 -0.802636127533687 -0.739328281853369 -0.641797879647366 -0.763770555605199 -0.815773571531587 -0.922104003321077 -0.880882767593358 -0.884017654714321 -0.94716948555132 -0.968874914418217 -0.946163251461171 -0.925925162595139 -0.949354528684912 -0.941156924736543 -0.931626458805698 -0.927257899356651 -0.928280045210614 -0.917435290615442 -0.926738754042299 -0.908809420539458 -0.935579347911725 -0.925654421467902 -0.875077810891549 -0.898419866157908 -0.948497595565927 -0.917376948551306 -0.977599274652603 0.108186621370458 0.592803322342769 0.449337572195995 0.865873434803278 0.992896896948461 0.85652311636246 0.386776280469882 -0.211024550708941 0.0245942542487058 0.113885101262779 -0.155086547129004 -0.166727899475948 0.117802957801054 -0.0250009114560046 -0.599062994093047 -0.339577667543845 0.23920120918449 -0.655437711804093 -0.794797036228939 -0.48059289791483 -0.480984676072271 -0.933375690318849 -0.929397592656819 -0.418477501699484 -0.589922985629207 -0.92675870627791 -0.881478140732188 -0.578059896358568 -0.395641909546378 -0.163612869459155 -0.0501051766082752 -0.201806250539001 -0.348902676951972 -0.0447003517281973 0.00858446337920349 0.208803824950821 -0.0297560512003291 0.145850654333369 -0.263097881107256 -0.256321006448727 0.209639877032181 0.0340961362986456 0.293941489712084 0.481746121738214 0.355371097391712 0.392432452771153 0.297943457108448 0.363957897127424 0.451658225237107 0.69085816496562 0.508674460702816 0.538941017713808 0.365796348029075 0.342464883198109 0.0601103988386372 0.243833960564525 -0.0380197406056676 -0.11156437070575 0.258389172155141 -0.59379108235945 -0.636322242035464 -0.492484104647448 -0.53758535270369 -0.760843870600879 -0.796803013142895 -0.529581394624485 -0.667007568489982 -0.929391497521987 -0.915989050512458 -0.36966382438048 0.0773705453508149 -0.576194908861653 -0.80296389845991 0.505089538816856 0.619088225253274 -0.56273588623398 -0.0343517248650848 0.795577989597532 0.645290565052091 -0.440569346910551 0.515553999492287 0.822811924893338 0.590805236663469 0.552117843972898 0.679678762661801 0.704348046824229 0.558499244637003 0.557448487298317 0.627207266243454 0.833802419430968 0.960564831750142 0.867225101549926 0.943332233964814 0.975081772783724 0.955550971039833 0.824289345837566 0.966996823897626 0.984373143792623 0.908371211010312 0.701470009138144 0.977726066052993 0.96603316143105 0.52253511854775 0.311726559197686 0.959180345148587 0.869199612774091 -0.31078389714295 -0.0121024535484167 0.769933743327138 0.684153407570417 0.23929022382041 0.445560037979838 0.292700279930491 0.000787313652017517 -0.357463457661518 -0.329943641279314 -0.285197999055956 -0.56563346152376 -0.656874891014151 -0.615277414134227 -0.677238508563689 -0.0583715654118333 0.524738446093078 -0.150063130091823 0.171606541125062 0.0526127139428592 0.144675014446432 0.18861629429494 -0.236546701023671 -0.445711341956967 -0.110127358424937 -0.167130645115201 -0.506887854872117 -0.226348541367147 0.337923955664547 -0.259407456646212 -0.215435806433028 0.620290793500034 0.771089634938004 0.722397560909667 0.817459329863267 0.772911896820418 -0.00593489773486975 -0.0111754983327661 -0.778003989453507 -0.363694798831614 0.25710961920347 -0.327930391802455 -0.841996387911158 -0.930042472695927 -0.882544941852962 0.469739630829787 0.45034581081745 0.466881905604409 0.407138660321927 0.378598830548449 0.11561973851793 0.0844796289682991 0.0748332166621822 -0.0908400454906432 -0.256491730592562 -0.282906871467626 0.0784868015811128 0.0292462875038112 -0.147193910237937
-0.0241791665091663 0.310474487194778 -0.368795594099206 -0.00859519550628984 0.105444630368347 -0.129254099249042 -0.385853619224928 -0.104476910114555 -0.046512065157804 -0.0332735317166945 -0.200644628673932 0.0246619272729219 -0.350908579771127 -0.56264958417732 -0.113106602512211 -0.153339970958734 -0.73354191491645 -0.753588030351608 -0.270599990798947 -0.410295667185966 -0.78816799202622 -0.719454758044517 -0.445453375362427 -0.677261541905601 -0.722724124569042 -0.682332926775825 -0.581893996440947 -0.68746108446751 -0.765684718149079 -0.644132827409423 -0.640843252408053 -0.389155364313045 -0.29139530594991 0.117219560180881 0.428178596053992 0.423838048757724 0.46845714133327 0.568743227466006 0.540004829665621 0.419123399897349 0.370919287317161 0.603888073311308 0.0448344752221994 0.0258061893556669 0.476300816164783 0.454632515357125 0.626844405288814 0.611287800273927 0.360560685465219 -0.31646935266523 0.117650644608194 -0.312239196651918 -0.36584787878027 -0.856963738337695 -0.444563042649347 0.0735484226495675 -0.210387790527346 0.0013299357526995 -0.541151597501695 0 -0.517801633399816 -0.023938819219443 -0.372258586419517 -0.425100961571189 -0.219104729557479 0.125038298205925 0.441215544838898 0.385582873988865 0.691971920775377 0.831516872175725 0.794148831174743 0.470798453776656 0.717949173512981 0.779053383803638 0.286198418072682 -0.212450798607878 -0.235510890842102 -0.189303970373305 -0.492887260406852 -0.6733869044019 -0.783502948677798 -0.690379773664457 -0.633392250549604 -0.729676580968266 -0.771604440670064 -0.899727316315308 -0.86670562960689 -0.894283137974328 -0.957388127051605 -0.972503457959406 -0.942566368318277 -0.94004657572692 -0.967094273782336 -0.951292875034373 -0.950734200658776 -0.961233135665427 -0.955779004829029 -0.944477098697534 -0.942489350727576 -0.935928320542453 -0.952184410027892 -0.956708970110013 -0.871383124393179 -0.898762335275273 -0.941978356024444 -0.910752414279858 -0.979119955091794 0.217800802925574 0.813997644268097 0.78902097334077 0.901892181897561 0.993282483044522 0.907009498075316 0.479836429367917 -0.0765976027297338 0.268162103600415 0.39731919504033 0.0205537462338094 -0.0196478159391441 0.397745350161068 0.229288146719373 -0.670175939601801 -0.289170675395133 0.479869344776117 -0.644621359816842 -0.841218139392728 -0.454646645562989 -0.340231911928578 -0.929729036871842 -0.92332498967985 -0.335320715911658 -0.618859246611048 -0.929124468958163 -0.890595230234524 -0.606830283195276 -0.450628102950949 -0.237585844277387 -0.131011826719625 -0.247846031333735 -0.421090610826318 -0.12653530346324 -0.0531698247222212 0.149770156331535 -0.082847117223355 0.113331696346937 -0.299620672936178 -0.311593653576461 0.171482361098726 0.0194267801313132 0.273872670257118 0.417693062268181 0.321093112581741 0.339001628995488 0.285942198166828 0.385815767137648 0.462527085890517 0.682884531237723 0.592299395715111 0.516292529284984 0.239724239627748 0.0728584553891151 -0.248061106437717 0.11353110541297 -0.1480609687149 -0.223447621771818 0.164863209411328 -0.614902795870808 -0.660756204924063 -0.560331139012213 -0.596429790523122 -0.771094766498333 -0.803794364278286 -0.644383186835692 -0.712987358504938 -0.932846594689029 -0.934179900302859 -0.636855644876876 -0.267610648097517 -0.72639244321209 -0.890478353383295 0.0958690322092898 0.419102435515484 -0.745183135407648 -0.454591035752025 0.715276228034231 0.496672293165594 -0.719150898914329 0.147440750072539 0.790391375811342 0.479115480013147 0.410556456974628 0.62235552948154 0.657089253942614 0.465398924862918 0.456561669708613 0.568803095887591 0.740994876427827 0.937508759196653 0.576941629549918 0.923640952393421 0.969745679673951 0.921404934835296 0.396855026482259 0.95014675968671 0.966103947697323 0.661367852720452 0.194031806993344 0.972776192158016 0.935436193924762 -0.154221875768198 -0.152404508221035 0.930436426560171 0.644231785457299 -0.69949835790217 -0.298469032054663 0.569863231778149 0.291955376758706 -0.19468953304635 0.117340724817531 -0.00298317843373088 -0.213038053962323 -0.472685047060177 -0.389736130740147 -0.383807114309015 -0.57746718853572 -0.652378306972393 -0.624864253092488 -0.675765978993095 -0.0894374512066586 0.442561769329724 -0.179898709609328 0.105971950137411 0.0274006116920621 -0.0182578318930288 0.148387441176305 -0.225222592128233 -0.450719374361266 -0.187549554803327 -0.152122507973201 -0.526457157841061 -0.347834405450049 0.215461593341372 -0.113699223869457 -0.32281857175214 0.580956983851797 0.848272518234146 0.803618945890376 0.856291329472851 0.914370790219125 0.380798163262436 0.250229708764824 -0.627913842728439 0.209241491611455 0.693818398034218 0.297944511884585 -0.405015405073116 -0.797284903467013 -0.787142127802011 0.694477261264857 0.619187813221361 0.624285438840856 0.617937132216397 0.486094069300389 0.294232165463197 0.362751569701956 0.351170171220038 0.109567327997859 -0.0921969482045455 -0.118944809616935 0.248142001844269 0.156969563812445 -0.0768272734634537
0.400668450735353 0.551618441895244 0.327994461754382 0.493097853317264 0.461703414553306 0.503516945953862 0.126964795455328 0.316845876802172 0.25419691537133 0.25634445694795 0.0930003902237549 0.0241391753134302 -0.411448093754691 -0.542949941819495 -0.249759176305863 -0.400821366345329 -0.73800656602795 -0.702541271600207 -0.472188617488823 -0.619540782058545 -0.842659423729434 -0.774128262723772 -0.675967652666652 -0.781988608349107 -0.78914019956765 -0.776006011968761 -0.73511383015369 -0.788521952426761 -0.832347813796537 -0.790317952785613 -0.784282214564659 -0.659759049076991 -0.595041943955009 -0.303347706514845 -0.0845078252020229 0.107822153609692 0.252392771521265 0.12804472525692 0.164877533871159 0.0784714271496174 -0.191259496635384 0.0392148546987151 -0.373549488497579 -0.370625970040595 -0.213089389908738 -0.242215104694852 0.186552991454743 0.0318428204451946 -0.316091242332782 -0.748614854026055 -0.263355334127951 -0.579696085432424 -0.665529549996114 -0.913927903319362 -0.612626723628984 -0.296329862923845 -0.37156521788219 -0.279975629581323 -0.335352991335059 -0.517801633399816 0 -0.446654447074287 0.0554151840697912 0.0563559985404237 0.130578665610951 0.362709829932392 0.583160365290694 0.442869988576147 0.737476016848167 0.853454359323358 0.837181053841949 0.539763981063101 0.678110551443259 0.629712810612075 0.0952826798263627 -0.304868253265591 -0.585668835410034 -0.631991689236725 -0.707434432896661 -0.828725818906308 -0.892531714712297 -0.842146585226925 -0.722579116571281 -0.865445440171551 -0.876466445625876 -0.927699527185047 -0.904150356074081 -0.904559720326616 -0.959162665182075 -0.971767069495237 -0.947722840284734 -0.936999773844451 -0.965941908412162 -0.954170517144732 -0.947074059045804 -0.946586936824404 -0.94841514392585 -0.93416772647877 -0.937759295737678 -0.928625627702432 -0.945535307190915 -0.946222425440002 -0.875771303938959 -0.906918582964448 -0.945933165418122 -0.91670810861433 -0.980071904253628 0.0821097628185044 0.682822350986796 0.588979169333359 0.866511081754541 0.99289930980152 0.87761889549526 0.363840294009438 -0.298121792583728 -0.0184634811049019 0.174443213591187 -0.0996286814305263 -0.266722126041806 0.141498311409942 0.105164506121295 -0.670824544448146 -0.452050914663397 0.324338937261336 -0.554256497417868 -0.813707962333289 -0.4847343365933 -0.199756762939603 -0.907285232292933 -0.924284844448407 -0.342673249389113 -0.367292088502158 -0.921972394835453 -0.879650533501982 -0.665195698753463 -0.415176295485346 -0.279346858875855 -0.151462393107694 -0.274574052534111 -0.403727600868534 -0.0708282844073447 0.00648126937277289 0.291795086157758 0.101486305926804 0.274182642617757 -0.0301774477627455 0.0564883076069593 0.505669156871776 0.287711000258428 0.510841826487025 0.62739387938309 0.59359966488908 0.570666221804592 0.532387495317567 0.595435746119133 0.622242550393839 0.705246170225298 0.704800453110064 0.646205171214309 0.361182780087484 0.263717242972642 0.030158737089873 0.500478036921385 0.281679406249318 0.276113849554207 0.574797820450824 -0.369221558392244 -0.517083528803077 -0.342480887888374 -0.442626579792566 -0.7061413213028 -0.76743941195732 -0.552410978962496 -0.68714456271041 -0.930397038330889 -0.921161989875671 -0.521629677235799 -0.106573327749057 -0.691934223199346 -0.871292155585279 0.289227790701504 0.5147495802737 -0.713480573344878 -0.360427135716714 0.748388384057361 0.539263634673971 -0.670118301423644 0.23152015382702 0.787591757466767 0.453233472058781 0.415278319780058 0.612766911200244 0.6367250001509 0.451103350848754 0.460055385267298 0.564218293296077 0.772982535756472 0.939146698473913 0.665448522757899 0.921394076851865 0.969919463532286 0.932096048846402 0.476045692703822 0.945654405228709 0.968643999531047 0.743174697956912 0.235982103962722 0.970442872980724 0.942481290824167 -0.0618447819545418 -0.159320962872599 0.935468390998407 0.728859866758956 -0.69445749489102 -0.310481461410832 0.667086946070989 0.477617959137509 -0.0683114975850907 0.364933791824982 0.223716444090345 -0.08171976269962 -0.357181590637536 -0.29100417537741 -0.283463831517779 -0.538836921350885 -0.605324240477578 -0.566843626630404 -0.609842548536225 0.0455004577203888 0.479665635080677 -0.135064510858514 0.198614247338396 0.175365239930365 0.296322405432969 0.324145833030856 0.132546940124553 -0.186458492789221 0.0644622361167896 0.0887648878738959 -0.434181129390651 -0.245004193854033 0.342408201245624 -0.135688131515114 -0.341071123786563 0.585560663212549 0.813927400421044 0.729656428220563 0.796385579975675 0.824622342180593 0.0815797685214047 0.0354037178605756 -0.724203377087141 -0.0910115466577046 0.522248744847361 0.0628019897676899 -0.539298086537209 -0.857537139125139 -0.852425281543421 0.316530009147242 0.256807504138661 0.0116306360011375 0.0530531024817945 0.146616686790315 -0.164818213046681 -0.290384731177836 -0.184896756238098 -0.27040162195254 -0.474586801224495 -0.502916689828416 -0.295079205845039 -0.225518102453855 -0.309271201697129
0.217742769486049 0.44502615247645 -0.0433817483538736 0.175963271720781 0.274281573764404 0.092609073768573 -0.263818879148432 0.0761118371749673 0.0205892223606085 0.0597489647274054 -0.133016743045138 -0.0791839267024338 -0.41279287934969 -0.547153747369181 -0.200826802535419 -0.309860626623398 -0.766405138531264 -0.697874227062364 -0.423168362972489 -0.51646196636329 -0.774425235955072 -0.690830184446299 -0.518056838008492 -0.656334807654092 -0.72611949985016 -0.692559404085756 -0.610102729109 -0.70895134563512 -0.769109774285597 -0.721971892762655 -0.682125396495802 -0.532673443194936 -0.444496437370907 -0.147308826479173 0.24149137092992 0.334059684627414 0.47717214911461 0.407344192131104 0.322394899073406 0.34712264215227 0.204624560500483 0.276125131711125 -0.136221069851663 0.00328474748157009 0.146659755286076 -0.026004054463755 0.375530903629908 0.325271644660905 -0.130521312063859 -0.539695499004533 0.000859189438393077 -0.48810412945531 -0.631161508459799 -0.853366899389037 -0.541798617039288 -0.0337604255572899 -0.308513500620696 -0.172564671629429 0.0666383569717647 -0.023938819219443 -0.446654447074287 0 -0.368075996031017 -0.394547346911793 -0.183582960595563 0.391480791334242 0.530193073913319 0.130196558303635 0.358291584883289 0.449951467251456 0.391132130222066 -0.0334506692240305 0.0279687726680893 0.076543482380551 -0.253259542885985 -0.460553071987143 -0.589715340822883 -0.574109710166328 -0.560502325162651 -0.668490032661039 -0.76108278198929 -0.650984225934766 -0.469965736416843 -0.662991523764379 -0.683909804373989 -0.863418319838007 -0.78970802331293 -0.796085567799286 -0.914452162085069 -0.941659573966749 -0.902459071381686 -0.87634406392758 -0.934404658032739 -0.903690476491268 -0.892822301908643 -0.909035406025282 -0.904668517370986 -0.874378402475554 -0.903910623113954 -0.900920620544646 -0.903041908904331 -0.899872048707163 -0.848642623716732 -0.872180769612467 -0.919995329541102 -0.90500501340204 -0.980042957017838 0.120532520134602 0.582434685239073 0.443826075100601 0.856161418683117 0.992123662972078 0.842747817278541 0.399995133508242 -0.266916923190057 -0.0771208390303066 -0.00883834905198941 -0.154917115391509 -0.177428541302598 0.0140701025274056 -0.0655443737029488 -0.499406454489596 -0.330894565513169 0.0841827645292093 -0.502240502659073 -0.720678513828627 -0.440154533847261 -0.36116674711639 -0.863886757528705 -0.896059889113034 -0.380570201323386 -0.418292695990134 -0.881049326862652 -0.82782991899805 -0.554261362829107 -0.226208087373511 -0.0791626566555897 -0.0792880107604142 -0.250128841580912 -0.345529294148474 -0.0721001563846582 0.0974736263701271 0.382361799669053 0.168762818982342 0.339348466676586 0.0196925489945876 0.115046781605951 0.483273572144614 0.302009658641254 0.504838070933812 0.569840593985742 0.504453498112431 0.497827343891532 0.403070963963609 0.40963554155986 0.447851887425593 0.550665797104747 0.497952590655485 0.546746484804799 0.205109016352844 0.279710094034176 0.103323088483709 0.562416295087173 0.436138706861991 0.449987263767225 0.662681906932527 0.00772828741415126 -0.231013484087523 0.0123458020365749 -0.06826420240168 -0.470308762427974 -0.6160204149693 -0.110813652684896 -0.268844406707094 -0.875096296166335 -0.881014100642866 0.0304560748273341 0.406640101369486 -0.247929321868359 -0.714995454388809 0.615667361105455 0.728779941836921 -0.274654525772221 0.177863785883836 0.842395901140617 0.759036008894864 -0.247070864193658 0.553364770273637 0.827636987531664 0.645605887739877 0.598635551904763 0.65478562034527 0.711347936242303 0.575387543369749 0.523206372896778 0.588728138579714 0.766704219977916 0.930324906497794 0.647114463685649 0.926972119459303 0.974723965211806 0.921296466020524 0.604551603838747 0.945982938292516 0.97211848698436 0.792483442636417 0.511758350759862 0.974302981266784 0.953663274317959 0.293339867211336 0.266900330283827 0.958619981929303 0.841654585966874 -0.365283557771392 0.134352062960715 0.811472813964781 0.734445963789121 0.523420444809249 0.698483540667975 0.623969999355102 0.388600719881803 0.07705886373527 -0.00593149299424506 -0.0445884761086914 -0.283600929708114 -0.471765997253671 -0.46706986952888 -0.464754993934245 0.198347440684583 0.534403888769937 -0.0714502555443651 0.306425416879089 0.28484077260889 0.4248716556922 0.423737837239684 0.376724885742695 0.258301375088196 0.310054532082786 0.357885831167103 0.0466036652887012 0.287952974548906 0.632513618670238 0.274741632970362 0.0800618055104582 0.703398673261371 0.870365773617264 0.831430824866283 0.86481135756659 0.881224925532592 0.228770295235314 0.204343544169798 -0.71934882562521 -0.165348535476705 0.5608285926276 0.00285307813065294 -0.771975344045067 -0.89542570847408 -0.823589637112024 0.561437383667824 0.4724766943016 0.383621045976877 0.359541208939332 0.326818516458202 0.0613365226125853 -0.0287661702154602 0.0283712608168843 -0.107094722524595 -0.34193585337831 -0.393281052294825 -0.0972665705084157 -0.0897410784394083 -0.223854072650486
0.111524150141941 0.286397143802709 -0.351666648835505 -0.0932734879631649 0.153778830263776 -0.300722206698067 -0.429336265782627 -0.0250222279881368 -0.125668086546339 -0.250178555633933 -0.336907087372866 -0.158597397262011 -0.473197176472075 -0.579266574461868 -0.214963513786435 -0.37789825927118 -0.777062738027756 -0.726786514204291 -0.361799127640327 -0.502455036633999 -0.779356441863423 -0.659506310031559 -0.449788767257436 -0.640284576260633 -0.699955863314 -0.649807552790687 -0.563651893771436 -0.6604244739098 -0.757176199924174 -0.644492114761851 -0.63409996333672 -0.406884197199124 -0.322127979548478 -0.0844829941475167 0.165997187971709 0.200704193988419 0.341326095512348 0.321698238992885 0.188090667986564 0.102642616254538 0.0721231720180875 0.188002096072704 -0.304308980700578 -0.192230140665446 0.102285297172959 -0.102370594619649 0.122555701197735 0.126625131181383 -0.188065190462706 -0.62491158781102 -0.295956199526205 -0.544705906652188 -0.666401924543632 -0.893170534895068 -0.751089368027889 -0.400802756757348 -0.478579990370849 -0.352570366704123 -0.365739658261446 -0.372258586419517 0.0554151840697912 -0.368075996031017 0 -0.561734865265713 0.119318962113956 0.427400614694052 0.135266390886098 -0.179626929242667 0.359538647138499 0.412014477725772 0.144949137085424 -0.407142232983284 -0.331455127763074 -0.114055145508093 -0.51576098557115 -0.643335495245203 -0.709853576233748 -0.697900378733872 -0.776284540011437 -0.806837598959223 -0.830109792963467 -0.810635698285943 -0.7295365338759 -0.799566912955801 -0.782907081922953 -0.890689644333514 -0.866747032074743 -0.870017656712376 -0.930037707893209 -0.9551795088985 -0.937302600295626 -0.923488360147129 -0.957125341874967 -0.947748205754575 -0.934997061253445 -0.931892516026316 -0.935353923214884 -0.925228861825095 -0.934316420704168 -0.921097530406407 -0.930133590080728 -0.941504517745366 -0.877231955978106 -0.897447887432969 -0.932724643732118 -0.922706638063762 -0.976351418175125 0.071953873633268 0.710001282288509 0.658777408743388 0.869838963449073 0.993029460822043 0.850648782005141 0.153628436900207 -0.424369951788776 -0.139589748358729 -0.181826298335439 -0.464125783629667 -0.417235848920791 -0.209103633311378 -0.437185450460511 -0.764700838638933 -0.582184225893928 -0.31997140314526 -0.754064668981373 -0.857781346333379 -0.697342566235564 -0.72056321516253 -0.918945631555544 -0.925313436845646 -0.624074410081076 -0.718786210660421 -0.91375934531927 -0.87539721751049 -0.717184754877078 -0.581959424937726 -0.455807892920538 -0.459886967572802 -0.493868560359917 -0.599774280943419 -0.41019485061186 -0.306159978121893 -0.0250349455866931 -0.230900174776632 0.0370996498212963 -0.336942313167228 -0.343087009785861 0.0555892260131567 -0.0171692059068209 0.136484969144948 0.179624558690238 0.106670466681525 0.0789415580953962 -0.0850309538145744 0.0077083316746191 0.13890697627364 0.341139280814864 0.291105143104712 0.166002328008643 -0.400694657951717 -0.303909919605129 -0.523899852092394 -0.0353467435892517 -0.207998202108028 -0.220846902647235 0.240261235213869 -0.455804647612114 -0.617425508255665 -0.448858396675137 -0.501143793951173 -0.767165399874227 -0.847064058465655 -0.719692677333737 -0.716802309475421 -0.931689517156272 -0.935471610908052 -0.738492996681753 -0.391528622524166 -0.741295143577534 -0.890798525315561 -0.187357153065459 0.345929523232589 -0.708395675077966 -0.650366341964661 0.66117858512009 0.513441899555086 -0.70320591071617 -0.106546421185337 0.724440683934422 0.315252957291954 0.229564400274452 0.443915082424517 0.523371261970116 0.330436922151598 0.328985663754725 0.473538477783889 0.619064368081427 0.797298725490358 -0.26428331113233 0.798348419172538 0.949413008954388 0.679698897568021 -0.401550602386136 0.909670508679117 0.937821991628822 -0.261049865199127 -0.410508513360875 0.971923343767705 0.901005440096731 -0.607273230518086 -0.42379620431501 0.940940388570599 0.362343903501681 -0.825414925428111 -0.416748345832683 0.648860979639848 0.272986605974455 -0.286736769796504 0.220324185086735 -0.0359419491748659 -0.271587136860711 -0.456028261749687 -0.348717069139701 -0.404130791311189 -0.635657531664126 -0.643367337723198 -0.601518981973595 -0.643607236894719 -0.0593671092144204 0.341047991646075 -0.1913469652447 0.116040482893748 0.11936850191957 0.194971168063562 0.248025910536361 0.115833610873913 -0.111802442747485 -0.0139279712958341 0.0863873335518615 -0.282899818047547 -0.194741780844553 0.335189266417484 0.149490740572819 -0.377034899653119 0.482715785561712 0.876123909464498 0.852160277469687 0.870424534470506 0.842559214074229 0.180887264446045 0.147824374681351 -0.752073078887754 -0.0569409401637457 0.704892604461816 0.149411880043678 -0.736474674794796 -0.786780992474553 -0.689431642555846 0.741513933973946 0.665321565846488 0.61589801508893 0.562682907153966 0.50869474545627 0.314352789489986 0.284468580308729 0.293285103679493 0.131925514183471 -0.0890845042065638 -0.15445981499641 0.224059717246478 0.143248693242597 -0.036483870964368
0.444119499954874 0.598103601091885 0.0821753001966802 0.48982325774845 0.557375336723529 0.0729841603082246 -0.0966744808586603 0.417252369348629 0.206088955145104 -0.0563116196902807 0.000167018306851737 0.132682535498892 -0.416999379247163 -0.516394824192251 -0.117629737854972 -0.286782072529357 -0.695607692238239 -0.653635777805178 -0.307259428874785 -0.481636688280788 -0.748606092768387 -0.682938156024247 -0.497583819427101 -0.682482738715094 -0.707989621727619 -0.677707347649993 -0.59721137265379 -0.690638894492165 -0.744418534996727 -0.655708610043691 -0.667868437873907 -0.46595267928736 -0.401263320032359 -0.0989006899339487 0.0808123383602589 0.142219948748286 0.246192553485433 0.247357516503344 0.203825962457112 0.0506245675483673 -0.0307729607229911 0.208387640676124 -0.326905069500096 -0.289610072558449 0.0209650502374384 -0.0701521651911007 0.166121374689354 0.126874745247383 -0.124824878928691 -0.631953024827566 -0.259045429900369 -0.50669151119213 -0.558043379752902 -0.915047372440108 -0.726548673275186 -0.378489162799933 -0.34288468559985 -0.278797396778279 -0.423425706119944 -0.425100961571189 0.0563559985404237 -0.394547346911793 -0.561734865265713 0 -0.463436103938806 -0.246610635250165 -0.151175479707389 -0.370121019010283 0.484062320613692 0.532558783068177 0.38262138265019 -0.191433594402108 0.0512541838507876 0.156566257221341 -0.52453250693176 -0.667939385994986 -0.727874909351064 -0.734670932949679 -0.806010571512165 -0.83155901542363 -0.851191284065585 -0.826758934855885 -0.759018948239842 -0.827486256030221 -0.827064012616341 -0.899459598345453 -0.88101200022988 -0.890501889608702 -0.944685291062568 -0.959699418993476 -0.942385795751707 -0.931539018662685 -0.957341917370241 -0.949722340419434 -0.943744611216175 -0.938900356489149 -0.942354479114136 -0.937689284482136 -0.936194376881196 -0.92094742409323 -0.940325728210132 -0.954497007706393 -0.866281371731373 -0.887507354569784 -0.933749055830587 -0.910393247897719 -0.974956675001145 0.112828846052537 0.801522861335749 0.773740613729946 0.884403429684352 0.992854081334664 0.869281395139338 0.208133134382473 -0.342909305324335 0.00364606594055471 0.0703183354965649 -0.332973720632538 -0.346724432094331 0.00477162432455913 -0.241042034751884 -0.779189615362172 -0.559537229136026 -0.0324199800560524 -0.7468873409188 -0.872094715212417 -0.666723859783592 -0.65966801521372 -0.923565807607196 -0.927663872754169 -0.592278864831642 -0.709243896206428 -0.926674724504617 -0.905610438676528 -0.776804099187707 -0.627785300756397 -0.498027835152846 -0.481347070222278 -0.490337061235821 -0.633496705011543 -0.411326251157341 -0.312221748253457 0.0155552816842989 -0.209115941076368 0.0657050944635617 -0.298415732244193 -0.285832180012772 0.164145687554857 0.0374459617951368 0.225081862290866 0.328982835462565 0.292311078069038 0.228246239963046 0.114492737884782 0.267059474548973 0.383878512285173 0.576011082883922 0.536379641148765 0.273821093437572 -0.432947230797656 -0.346358911722353 -0.55162027780749 0.0136881838662494 -0.19555474078282 -0.210188592281526 0.207453868807448 -0.519709309291497 -0.679579502645994 -0.514918442709882 -0.562612128196649 -0.802457946703209 -0.859896725655701 -0.745831091295738 -0.749499276372585 -0.934360191567387 -0.939986114198245 -0.773355174292499 -0.517279860194796 -0.783283832899326 -0.900630153552473 -0.375795776807221 0.125668922681094 -0.766335810437674 -0.717801223522023 0.436930152873072 0.253058959545425 -0.793839086891956 -0.402313582884022 0.636551653013203 0.0893268985981842 -0.00276169440784396 0.332565042641753 0.386021572973624 0.194835744642511 0.245462940954245 0.435663414093426 0.584468041235263 0.760779321928848 -0.569674445596783 0.539539115892151 0.901693953986034 0.549108736740017 -0.697761355472063 0.867421745220276 0.910323019201515 -0.654796457402893 -0.725437600230668 0.961055179961935 0.841485490511816 -0.82655128218699 -0.742946162576498 0.884500731700844 -0.178040554495634 -0.919056506199412 -0.692086449126994 0.372171061295008 -0.189730449313255 -0.581438916027738 -0.171046802495651 -0.30433727504169 -0.436184085424035 -0.544892074066626 -0.424925079774457 -0.478136850790779 -0.669499443464398 -0.664265264936158 -0.621237214910592 -0.660436730728309 -0.148340338518575 0.231781205913036 -0.252574875347177 -0.0038211793423192 -0.031610709429517 -0.0817550791863382 0.108672996068637 -0.177669214710644 -0.366827458278019 -0.271058671767554 -0.184092226769 -0.561992852406998 -0.499093244648495 0.0378544849128709 -0.184434187343777 -0.627620197434199 0.220731979769532 0.778924523245366 0.772692665868433 0.765945312676246 0.804127908160309 0.224210535245474 0.126970010753685 -0.640170033626284 0.240937344100384 0.730720949245526 0.42897235011724 -0.183444162742845 -0.426664297391446 -0.645056726880319 0.695325491466388 0.605739127310851 0.45315632853272 0.449401851040164 0.451530160739861 0.230565601227938 0.190873896384996 0.256655354706585 0.0987849191266713 -0.149050506377134 -0.201979372038774 0.151554919659191 0.0919523111510741 -0.0999143017429598
0.522208819569128 0.609529680141536 0.265765497103905 0.498381471001328 0.556721026355847 0.289088603155455 0.00280305212943749 0.37578001949847 0.253762047406835 0.082934732442464 0.0656663543691058 0.103123616528417 -0.444707847626374 -0.562727360819065 -0.192538166364866 -0.346111953658252 -0.776601110382526 -0.716573514199027 -0.48933548452731 -0.61997760039462 -0.82215855246486 -0.75468038068701 -0.619748131443779 -0.741053579601183 -0.79290662771669 -0.77421066242745 -0.683652650130018 -0.754153105962119 -0.819820518431391 -0.79490466890386 -0.754938525039363 -0.635683551742915 -0.52967372302142 -0.208317116548961 0.0573438928615154 0.17098551068461 0.278906606491912 0.212113121419358 0.197161244630046 0.154795527837153 -0.0025743727825853 0.150463306006218 -0.244227628456158 -0.17691123314488 -0.0279512945701772 -0.0814524422913497 0.214046931068993 0.13942958938786 -0.139217111882062 -0.535562588313363 -0.122892656895215 -0.469228677017628 -0.516731573767306 -0.86686234207095 -0.492941720763896 -0.141125335649463 -0.161406587305369 -0.0594288491718955 -0.140449603628205 -0.219104729557479 0.130578665610951 -0.183582960595563 0.119318962113956 -0.463436103938806 0 -0.496286107981223 -0.0301804210381379 -0.376209516155796 0.475544622191956 0.453090187191581 0.401107175451764 0.014355845449007 0.202163891676616 0.0198126853407704 -0.391571700577569 -0.568196422311897 -0.642772373043272 -0.644409602410576 -0.681626306753468 -0.741399872021819 -0.798887322343535 -0.744499150515413 -0.616376184494689 -0.75093470880098 -0.755551877556722 -0.871794684706335 -0.84219289062084 -0.824777874847807 -0.918190752116546 -0.953492282255958 -0.918692788722431 -0.903193756358714 -0.94362351478488 -0.936120775866311 -0.919315335385201 -0.928193748279061 -0.92923372343334 -0.917036116645424 -0.92772189780811 -0.905952307954936 -0.924732917416641 -0.937021295388915 -0.858464712121137 -0.874988222791029 -0.924233316170761 -0.90270921722367 -0.976493015305937 0.101346668391702 0.699887213233488 0.627788681351668 0.865763790321417 0.993126625152266 0.858026609579508 0.350165007061994 -0.273255363078538 -0.0241074155004282 0.0912411829257158 -0.137696804416222 -0.208478785258351 0.0792499566531391 -0.00410132895935127 -0.610304837676357 -0.402255765231624 0.160852283226056 -0.504732039043136 -0.763816774751681 -0.454375724613784 -0.303518494835683 -0.857667286923962 -0.896119676513994 -0.387753618583189 -0.44182270008691 -0.920453516735836 -0.891946940783779 -0.679392981084534 -0.281403506041065 -0.179898198334168 -0.172286632672876 -0.28854478386594 -0.417681783725554 -0.132878956027618 0.0646697415968329 0.473257131997394 0.232818167847161 0.446825514742799 0.0785181742333505 0.169240995225101 0.547338077361274 0.376291657954057 0.59679453348792 0.685172242331284 0.672637498719298 0.596726887999765 0.507592017226234 0.620187711838849 0.652214965867647 0.69332981686245 0.706149942190752 0.530200814260653 -0.161626986304204 -0.0404677475679769 -0.233846776531743 0.604339709612318 0.483683687789599 0.536157187665612 0.657696778747412 -0.0014991848047424 -0.369668987991523 -0.118886618651402 -0.249834040029522 -0.693580010859363 -0.803238024001745 -0.454092061445573 -0.525619193522743 -0.925694787164778 -0.919088933536823 -0.476594541387581 -0.0353235464573956 -0.594620638814728 -0.844438724013145 0.137588175599891 0.517341328432575 -0.593703462372369 -0.428695890937692 0.729871226289856 0.611446592979622 -0.612828513812532 0.0748089581385146 0.757904314357456 0.415072473990534 0.336542551292159 0.502842596956919 0.56790924739103 0.413203814371555 0.381430604776033 0.496929359792942 0.653535002721198 0.861094447046901 -0.0954904524216205 0.759438383141132 0.936261497085396 0.832125413983387 -0.341878030355152 0.909724372450515 0.94736006122837 -0.0139135951649347 -0.430078692821084 0.974184828530135 0.927016633035131 -0.615320020209082 -0.513546643900599 0.943749617003707 0.469188048812444 -0.866079278064093 -0.476641813901633 0.70718076873038 0.389652059123956 -0.220411207728644 0.360455539218378 0.264911447875583 -0.0994955110904397 -0.330333224740938 -0.226423252049843 -0.28318992065424 -0.541823200510565 -0.587292273649829 -0.558661340498904 -0.574478493360295 0.0689919740783845 0.376747532353063 -0.172753372042173 0.139316270601377 0.200841439122492 0.301618959109632 0.344325474679059 0.184508785290018 -0.0410040542449303 0.118124349341114 0.193597662601203 -0.341332052594811 -0.191185795227398 0.388253487768824 0.0519013554112458 -0.460676883866117 0.533852336530364 0.811465002890616 0.756729715098121 0.793435191151502 0.81212425216136 0.194354361566177 0.13276806993833 -0.722104804418721 0.105790919390219 0.715715647980296 0.303097139039058 -0.466141019947024 -0.760162697510816 -0.779571048307247 0.589594107270256 0.478810791285799 0.24960072502356 0.26165054977625 0.305798742227852 0.0114641351225338 -0.127023073194878 -0.00824489366097455 -0.130072642573158 -0.401950205140984 -0.44867152981214 -0.185708158095232 -0.12744839071447 -0.259200518506736
0.228887267058414 0.230715612826431 -0.17993081653668 -0.0840769656404749 0.267867653788695 -0.157794092732761 -0.277125369989888 0.147379839583536 0.137921319639325 0.0151467231317897 -0.0758542205867819 0.156896654889119 -0.227885941019422 -0.434442524337215 0.00396485860922287 -0.0371875177730163 -0.56300214362932 -0.54191645801631 -0.153949814176418 -0.24771155058866 -0.654664898605682 -0.574455994354455 -0.236379185257105 -0.470019464248939 -0.620845137758746 -0.582629971657753 -0.423843427616655 -0.567080709898991 -0.673737961732358 -0.554191783243745 -0.514575101190941 -0.263768994594886 -0.149413129741455 0.1056459469438 0.46048250385254 0.521511892290041 0.587743414776477 0.593701713086485 0.496172059525727 0.513512592470585 0.451160670788505 0.53871538138134 0.175290827036554 0.271448458392646 0.459090626889017 0.348579707665597 0.599883986332451 0.591742959018812 0.257417791219296 -0.219395439208324 0.258331645474937 -0.226307767123059 -0.253235788680857 -0.685453504734149 -0.260827111670851 0.177794487374168 0.0411650828870757 0.205416987563629 0.243046921288544 0.125038298205925 0.362709829932392 0.391480791334242 0.427400614694052 -0.246610635250165 -0.496286107981223 0 -0.333948594368405 -0.408398773703397 0.443768842828928 0.375709164107498 0.247032810292414 -0.260668299810588 -0.17657816619974 -0.121217039033455 -0.284777745624489 -0.386101274642834 -0.53958670519806 -0.433526983004373 -0.426481548257622 -0.505323912372754 -0.677521195115567 -0.551193002137197 -0.313007252175309 -0.501751648591829 -0.494726845956391 -0.760757414293414 -0.665887745595082 -0.690698194461671 -0.855878708076054 -0.906102246555388 -0.861461072910393 -0.827552489324981 -0.907841210717533 -0.864030428260659 -0.853006622672082 -0.895262183886798 -0.869407059626059 -0.831871787850317 -0.880126862307233 -0.872956274024127 -0.879559062353499 -0.87157715931668 -0.832567131936203 -0.847554742030173 -0.896274738904258 -0.887010555336999 -0.978943699165932 0.223860778414312 0.704209948451927 0.684347945706902 0.897786209815873 0.991597463479822 0.850221940528048 0.476941831786176 -0.0910610726417002 0.133316162177332 0.153140366992785 -0.0605275417686985 -0.00255336755118803 0.185348185593437 0.0217625415461698 -0.411273994139731 -0.178313978483706 0.189724412371835 -0.486200781080981 -0.639944152272588 -0.312320524116363 -0.340001506009557 -0.892409251280715 -0.895397508063246 -0.353606540671584 -0.491674310283245 -0.932264255675089 -0.877697659043675 -0.450975872316841 0.0374538312085121 0.114060104023193 0.058863789467777 -0.16793451710559 -0.301590128912355 0.0195614216892245 0.358648566792887 0.624686735440089 0.441004068767505 0.639625471386459 0.151944260458865 0.222752128217637 0.517853575220389 0.408500989897151 0.695397565188269 0.67286657435368 0.606632089545589 0.598388771826698 0.495495870145312 0.480645624675613 0.497712625177639 0.551242960521336 0.527032629680186 0.525052464837997 -0.131458026992906 0.0762121179737892 -0.0890528349072047 0.646721123248573 0.589201854199532 0.606059819352108 0.764673953597901 0.42542030989056 0.148019367437633 0.336262490423683 0.243606029694822 -0.151270657783861 -0.436628823767162 0.0476426490582926 0.0226462911227264 -0.807439363252913 -0.829517502261894 0.0176256680876548 0.407396472387664 -0.0104957807778391 -0.673264466926563 0.510833158398694 0.750927620181079 -0.0664691051004766 0.075798516811717 0.785294599570643 0.77691975366817 -0.14655369799064 0.374642870801295 0.76701731244813 0.619637380910817 0.479840511667869 0.524930059726185 0.609066419707644 0.508995946292782 0.420380264782113 0.504863205255921 0.637256148779598 0.815494924291982 -0.172926351954474 0.752574606715382 0.942837591684757 0.6938757155023 -0.223840154581275 0.891647644437656 0.933965571409648 0.0284779506244978 -0.0658516689419576 0.953769839101866 0.895536045574151 -0.299629893420452 0.00489777838713733 0.928319398218621 0.566029053905543 -0.611975212727871 0.0328976612573687 0.738543152243891 0.607548599248155 0.294930994868819 0.625832437745014 0.578077501833763 0.356611488743984 0.129239227719222 0.0959443986616914 0.00693245428796359 -0.266459699218335 -0.425374067272321 -0.442311473111555 -0.392477150394422 0.220850020331748 0.42285713617768 -0.104129444253564 0.234955830426144 0.335221383376228 0.430597746445934 0.454628290483329 0.416780825027071 0.342555929054643 0.377988435859953 0.481753736584477 0.136629375025908 0.301173798142413 0.643640733667568 0.437596247367609 0.103615986713986 0.687024611782504 0.844818675731781 0.843767471558113 0.848047655464083 0.851983668732571 0.399291609225412 0.324736029331764 -0.499097176812719 0.185976594153522 0.665418080901761 0.300815113576346 -0.486366646295338 -0.622004685720669 -0.50456818523492 0.726387439138656 0.641671392991617 0.62544844767995 0.595135725856374 0.516523338878882 0.333149882447798 0.34187475759909 0.350156084544344 0.152477239586811 -0.0927465065410401 -0.160709554369244 0.164187378435081 0.0970926708152843 -0.118058881687814
0.297180837254047 0.412953458865917 0.0891459731467788 0.224416479537101 0.397926121622812 0.229758359072554 0.0545358406667484 0.35532334022837 0.410871697124917 0.509587718789131 0.374285900350702 0.405352231612294 0.146134426149858 -0.0432181959141644 0.278723772586309 0.253379800783407 -0.36856142856357 -0.358286439213629 -0.00199253436903033 -0.109076413222961 -0.61948852220859 -0.507453481934512 -0.116768650064569 -0.396655522625157 -0.610614347784507 -0.573379738967268 -0.389299058695255 -0.519841170905235 -0.658190449290184 -0.581502291908701 -0.504644457380991 -0.264066035520248 -0.110636508595782 0.205146630600436 0.554908304861861 0.570749152489709 0.616576625682428 0.635402226715935 0.626336199398244 0.661070540727072 0.608087623675012 0.660870821668243 0.454793784702442 0.487303522115407 0.639947183063029 0.594306321064232 0.711867574548937 0.713025154277604 0.57538876677618 0.160049691200042 0.587476828232305 0.0991185342672927 0.140155391893169 -0.652811950312989 0.14022334778722 0.545559256305659 0.499077701870254 0.669219283718031 0.507241388303703 0.441215544838898 0.583160365290694 0.530193073913319 0.135266390886098 -0.151175479707389 -0.0301804210381379 -0.333948594368405 0 -0.220511055343334 0.349670976124264 0.318993949193854 0.338513797085801 -0.111823075167068 0.0191467900141701 -0.0796439551335984 -0.104911866544 -0.269762466847766 -0.622950773239537 -0.464833452143633 -0.392911459371646 -0.549493439775927 -0.713036009214152 -0.517863252902126 -0.125002589218465 -0.478192340639424 -0.494746305961227 -0.75515815442506 -0.601212870537639 -0.647138189189338 -0.83253438394841 -0.876442563922008 -0.830650400524087 -0.788185232530533 -0.865943423319275 -0.816535776105955 -0.805641707814454 -0.82378085743382 -0.800297838110084 -0.779795768942094 -0.810268428920627 -0.748778237032975 -0.804342830522818 -0.837011759527729 -0.68482045799506 -0.721786158499134 -0.846658410281698 -0.821105886607274 -0.969627947996052 0.255792510990144 0.565650483797932 0.397112128132185 0.862866393707476 0.992866488424886 0.879333531284184 0.653525990637077 0.155242690685877 0.22033072057445 0.305418632331973 0.290468641888609 0.317994307975384 0.41162566093046 0.408544050379273 -0.0440457356551867 0.160627767809016 0.525478728579166 -0.119270280051025 -0.422617900006103 0.0544655440110137 0.176145157790263 -0.763438135005958 -0.829486066172195 -0.079289041655675 -0.13537757730451 -0.837162651833053 -0.812719051651594 -0.240325334747285 0.365547837150434 0.375534101968661 0.331348140878309 0.0667158534414672 -0.0288615116621659 0.246427832900992 0.502645139558318 0.686409426494668 0.521929612078692 0.566422156596093 0.274290535410899 0.31822307781655 0.572580901640417 0.39023574609889 0.612538993720709 0.687854194761711 0.616653790924597 0.590811825545951 0.613814671972757 0.58851873034277 0.580975488806845 0.629230062140295 0.609058722269978 0.582309267775347 0.182042421756305 0.301481938590634 0.274090102642903 0.753891633164282 0.739901663037711 0.787634943218586 0.814424955823326 0.600928775169122 0.436342985677405 0.543793810435112 0.52314336456552 0.20465764563745 -0.0901231785009203 0.579510026769296 0.494364904865118 -0.70203078934074 -0.524409313164396 0.630083861821942 0.707864671211434 0.498907760536126 -0.161237056041323 0.740311101312075 0.80875325447701 0.404519881940402 0.570732499973262 0.864212031349317 0.827047515771842 0.367318020216111 0.741178149997247 0.866117721559028 0.760028772453217 0.742614566548984 0.763431399670132 0.786062961083819 0.732275941345409 0.659882297950968 0.676326552711642 0.750628757651731 0.925994401649383 0.688283841521947 0.900850968051994 0.95312707021313 0.942490465067087 0.68757701075411 0.945689786125268 0.964113840719573 0.81896051523486 0.631723531951707 0.975624953194347 0.962303661623514 0.493699516519777 0.53514862680158 0.958610119255685 0.851461020812588 -0.255022679108646 0.404107707458555 0.877657812900846 0.805644372033588 0.535945896686563 0.752018793909072 0.719826504159899 0.539552769307809 0.284664431854787 0.245878321165594 0.144035476465458 -0.166257915146641 -0.359325711663324 -0.395215436418431 -0.366607686698012 0.184530969378725 0.482513335860273 -0.112003713571969 0.188727644958858 0.234241618125657 0.353908972073648 0.396801239955564 0.293792561220254 0.298558225177532 0.400188611582365 0.495825859657228 0.16286283899415 0.434312759706388 0.779136975855023 0.542225372181428 0.33744099079161 0.813007663223149 0.827333499167184 0.803093519332759 0.839872555663501 0.886105910981993 0.552322086744084 0.437295906768019 -0.459834236839457 0.229890661457489 0.660696817800362 0.293937249364224 -0.580598266562193 -0.813777193005204 -0.626213611276958 0.720777858760166 0.664709051341222 0.615842607303173 0.589304643376623 0.521664298979481 0.345695190174247 0.338792438942008 0.367658763519748 0.18557648661239 -0.0380940529742035 -0.0845460198674619 0.191911637267267 0.15838578010814 -0.145102954501126
0.290102231263792 0.454607744582691 0.196309770837259 0.348466138385565 0.39874462667708 0.412456332489882 0.173924519401026 0.370918202425835 0.431717473429448 0.619389730666613 0.468079780990869 0.383195990550641 0.24472001460829 0.103363477228654 0.285693749164421 0.25453828789877 -0.313392818935914 -0.331376570512624 -0.0621696021233843 -0.183544406662867 -0.639802577783981 -0.543070481521621 -0.219494156518333 -0.452883535338594 -0.640791262317296 -0.613854746441652 -0.456968174212903 -0.561089399457111 -0.684121378303748 -0.641019695389381 -0.564352412090016 -0.382192053893884 -0.226632313650995 0.131050239991153 0.553055608151541 0.587764118785189 0.645643505596139 0.615792081026099 0.645204528811256 0.684390130375173 0.587638684060514 0.639417211099071 0.441721742720538 0.517598412407107 0.591631374438229 0.556472591599743 0.686802673055252 0.67379301072514 0.574058744870242 0.229168835885819 0.618202948084313 0.19385096466759 0.229018198620847 -0.551775701896873 0.318381557439215 0.641057865286902 0.610659167831825 0.752225023655569 0.490216109083032 0.385582873988865 0.442869988576147 0.130196558303635 -0.179626929242667 -0.370121019010283 -0.376209516155796 -0.408398773703397 -0.220511055343334 0 -0.455923828582359 0.282436970254534 0.478918390119651 0.298742949663301 0.442955332351371 0.0514091591514483 0.151071833232621 0.0267838512525378 -0.518785978114128 -0.398485762083089 -0.210095783835257 -0.4266314252332 -0.661828981819086 -0.409971656169902 -0.00107992805763708 -0.392583734215983 -0.520178717331081 -0.713488896110298 -0.429121233602561 -0.549387247447013 -0.800358153694712 -0.834891051469079 -0.732567281153891 -0.70938940425461 -0.826647273891543 -0.719943101198 -0.733574583068944 -0.757064726939317 -0.746339723209445 -0.679250995182666 -0.735398750762735 -0.673639044223162 -0.741840986244566 -0.770003898114539 -0.613000766538893 -0.677494740890743 -0.814786241914541 -0.779572252218635 -0.967744750673793 0.226031838401378 0.285147127800347 0.0378108280142543 0.821394863626221 0.990992540810144 0.859888824386966 0.682793581193241 0.208522419184436 0.205036961843652 0.337479442470996 0.414525709631033 0.402540744496425 0.449908325908155 0.516895794398992 0.217906497549419 0.279701683735963 0.594698310228936 0.180312572884399 -0.161548818504481 0.246686632657524 0.459966722538576 -0.549933357011642 -0.743690008254719 0.13325586746753 0.138136912921681 -0.736746603743476 -0.721298669208175 -0.134407072400576 0.395449928019471 0.399537700701497 0.391707740957746 0.124975410885403 0.0501919441156512 0.271676183697296 0.419415326822524 0.606434847410201 0.435117473086259 0.476070356528453 0.257719272249202 0.281616713520567 0.54310256169234 0.29416170431117 0.507489814665292 0.617896687593379 0.520292822107611 0.495681701409408 0.549125434961428 0.571772883508439 0.566436122800547 0.679289003275474 0.594584320974962 0.487455941814157 0.453888982256912 0.356668916794033 0.450167789269885 0.675646389826692 0.649480928858215 0.700738385206223 0.733583308590525 0.449218426478721 0.342991034187131 0.460872026800075 0.442930987199029 0.17364502522687 0.0530569247860339 0.591779079375814 0.470776992412988 -0.562842038475887 -0.212593726328496 0.706589045194014 0.722607176261508 0.517155848119678 0.154738042856339 0.777389014824183 0.793374744493778 0.482309113798527 0.684336253619472 0.865269362456023 0.807782371807707 0.489907425229531 0.805317152754348 0.871161274295438 0.771114541848163 0.795578206220622 0.823982051251793 0.819092061620378 0.766653811655289 0.747575318612161 0.74578074639874 0.84654265493841 0.95492237639692 0.909595118765092 0.950743767259802 0.968293407630359 0.96717924309853 0.884410635141988 0.96461304346119 0.974746052028465 0.924615242484891 0.822709729094327 0.979254310354136 0.968185720542157 0.777636756814354 0.681099720435136 0.956696804693152 0.900879746031262 0.178377434371913 0.469266387528743 0.847702458099205 0.804716244335779 0.572609204881012 0.708124410492008 0.654054788262062 0.494401275118495 0.241941239439411 0.222794535808611 0.145660458387708 -0.142275562978145 -0.358352496852449 -0.390295895787608 -0.387006934732833 0.119503800335026 0.530424889639431 -0.119685445004149 0.176760921539728 0.160883552719616 0.303008977322989 0.324639890163929 0.137923840118929 0.160641430145289 0.280879974891004 0.307688323208537 0.0452149280131997 0.353660233977038 0.687624984701801 0.400543183214815 0.31812576903224 0.784903266579384 0.821338681384455 0.782088145359568 0.829020688883444 0.859855115545823 0.525376724104345 0.430378582341601 -0.536970320451813 0.0695113393672535 0.583368360706474 0.10559376658943 -0.71286970041214 -0.911380523053756 -0.79196174755759 0.574391782557048 0.557526419696445 0.475011071281546 0.47069630933567 0.43441045196424 0.222991209991127 0.185597144152483 0.245306338739403 0.0618093369164765 -0.15536232753231 -0.190089717902539 0.0790612927986124 0.0945338059457595 -0.228207205013095
0.651338726744378 0.721157025258396 0.663114994585632 0.723214157237524 0.691746215886023 0.761050693201914 0.677913930557444 0.718988981895968 0.717461956587905 0.80825228517389 0.773026410293482 0.721734427184612 0.677126560218175 0.697304961712615 0.676454440315539 0.599948474725815 0.405170095094914 0.387635230154705 0.411477347991515 0.277663765640902 -0.265152785807292 -0.144172004239639 0.139454963563208 -0.180763190758001 -0.495979136299585 -0.412434350469007 -0.332558877478922 -0.471755147769846 -0.602746014881644 -0.521969632365991 -0.521021841175905 -0.28024267117976 -0.086484416000611 0.267433514527046 0.602636820067435 0.615058708305988 0.670774445311526 0.668778980074239 0.681863914855768 0.699330691310878 0.635121229670194 0.674659837817964 0.499310915187601 0.565000871686418 0.641381912554027 0.618972664251116 0.69632501867096 0.706085699517578 0.69303264049504 0.425480613650719 0.637632121323874 0.523419988687143 0.615246581336549 -0.00942021452701705 0.590022515530015 0.741206687253736 0.808304597697592 0.78770807406707 0.626153308211254 0.691971920775377 0.737476016848167 0.358291584883289 0.359538647138499 0.484062320613692 0.475544622191956 0.443768842828928 0.349670976124264 -0.455923828582359 0 -0.523870859994508 0.222946265199497 -0.0646977281282629 0.170209427819953 -0.43471820245684 -0.328060984388395 -0.40033950614842 -0.624441484025401 -0.421669121988627 -0.350724453341818 -0.595257492043869 -0.593713928658561 -0.268860070023985 -0.0998739002370801 -0.453248581918655 -0.46959804926731 -0.638080742176043 -0.414990748671656 -0.495721488886609 -0.723241491564291 -0.791131550384392 -0.655583299661348 -0.594556294587554 -0.721652009813795 -0.62576684481874 -0.656279688409257 -0.667127588111257 -0.665698706155042 -0.621284867084179 -0.656218680098415 -0.555143701601692 -0.672740780464133 -0.708527710074695 -0.51581645992058 -0.553598745643186 -0.757449945266782 -0.688182971866845 -0.959537758164768 0.277579308384923 0.24283705652035 0.0540925021932042 0.804742790428583 0.990251528659898 0.863902961502182 0.716271509049285 0.332843715456898 0.305852047221964 0.443743925903586 0.535116140002991 0.48658744935364 0.531108524721715 0.601289655604835 0.382637119941146 0.381207187663062 0.649750005140575 0.364018148441655 -0.0134957120231238 0.337008832065577 0.594354906767438 -0.394069803796751 -0.705071091212676 0.12078266815606 0.195251903515912 -0.717852991419847 -0.741688127030739 -0.424310701987259 0.00452157797724195 -0.149271090119152 -0.0961201089868562 -0.287163773006149 -0.423400238108883 -0.212105054745676 -0.0880553545734508 0.338538861315157 0.130015975621055 0.199616998355413 0.0757130906502752 0.110327451970103 0.444854339223561 0.109827774961776 0.316121481138184 0.423628781646698 0.308897784449003 0.266956511710894 0.277715305172462 0.327173285284364 0.355582463228294 0.391506616926679 0.196388777767336 0.236325818177832 0.15962056575351 0.202061883235286 0.357506794776817 0.562456311687389 0.491686497649745 0.575591093032289 0.651734445522507 0.0793013215447059 -0.0316469190299923 0.214838736371215 0.192266958366231 -0.146015399319858 -0.173568906681144 0.473342309931512 0.256642529440562 -0.621333224917548 -0.216892421493396 0.67234680214469 0.675699044439048 0.4054061570337 0.165947541273296 0.77355912783639 0.768169452115773 0.421917808260426 0.689677831545622 0.861592954405785 0.789488686109595 0.477952370396275 0.817443276449669 0.870290062827587 0.767928414009209 0.822421713825037 0.853438063474109 0.834509768246533 0.795251209841322 0.803299709282179 0.801756302085482 0.891321942295137 0.969388549428302 0.947276592524531 0.96132768157419 0.972848587997569 0.974558304289919 0.921231081922825 0.967225638296814 0.975280321159912 0.937993660967907 0.854792038238967 0.978236579785328 0.969832313958418 0.832273732628877 0.742114761932913 0.954769456965747 0.903776766495024 0.396228075798373 0.573774203272723 0.844117463771389 0.798924178623707 0.609475947883357 0.701665073682124 0.626160859773575 0.480709913705494 0.224254752874846 0.142581070657042 0.0576042637480477 -0.224303152234563 -0.435212488885927 -0.473541096957286 -0.487996582116269 -0.0188563209148741 0.456664301896177 -0.161960861668408 0.156431961303931 0.17965600555732 0.349590434113166 0.369342562179355 0.355575439029449 0.326281231896959 0.346959854772125 0.430747159395653 0.293522097570975 0.479926649372718 0.699335400302732 0.542822343770861 0.49981180226659 0.784885574710289 0.80940003130136 0.797251672443156 0.829656991188641 0.841478654928823 0.710327837216728 0.646485656338041 0.00255207530534195 0.504525937547797 0.734504155368057 0.505586058782467 -0.208388006953235 -0.813084515596154 -0.671708216757482 0.59857598622407 0.618992085610568 0.508827737248023 0.556747299977858 0.552297151239786 0.408593237695567 0.384808432796642 0.476769071975988 0.342463779132864 0.170181536856833 0.152171975480023 0.353700840852498 0.381498631777262 -0.122917321045964
0.630246715531864 0.715019951331985 0.729665362785468 0.769481645418666 0.701870022162414 0.825422669526252 0.799784029567369 0.787203660241231 0.799771391131382 0.892074916620316 0.86398530741855 0.811103332985498 0.812880309671133 0.822190969518545 0.783799479349983 0.760255239066598 0.703596526906686 0.673183993852769 0.659069381778741 0.545822469740499 0.230533642226045 0.280168370147357 0.479850446227142 0.270491222707033 -0.150461718638541 -0.059800144524223 0.0254099037866778 -0.127511713439283 -0.349831461183075 -0.236583020317439 -0.284069489343877 0.00321377820960707 0.201289201768453 0.509002211788373 0.791420584805831 0.761257835128535 0.831692115420481 0.81317390702736 0.788824063528921 0.830713037864868 0.810428332682855 0.846693887607381 0.731526631779887 0.772983789745956 0.810641086175116 0.76943163681817 0.843758297796242 0.824727774287307 0.825017990579478 0.733150367579128 0.826593035946641 0.775188822120882 0.813673037552001 0.652593975820215 0.773374118259349 0.839445618223208 0.893672028043168 0.879702011579775 0.745929619007647 0.831516872175725 0.853454359323358 0.449951467251456 0.412014477725772 0.532558783068177 0.453090187191581 0.375709164107498 0.318993949193854 0.282436970254534 -0.523870859994508 0 -0.621019257423778 -0.11824127233624 0.292097432848463 -0.143134142221165 -0.0755608488776791 -0.155564357024047 -0.389054199468884 0.045188973294118 -0.0190070249313826 -0.309983530396591 -0.161462569651315 0.167504063556426 0.192581719911414 -0.107479335077209 -0.0794555329080607 -0.364730351582464 7.73445684971124e-05 -0.0969996478687026 -0.474837014877581 -0.611297236850236 -0.297324796787029 -0.198957225277446 -0.456047805127174 -0.256709534874427 -0.331120200426172 -0.39884533186508 -0.407064938379877 -0.274952091777611 -0.370191277228405 -0.242185002230512 -0.398388258756283 -0.42356103449648 -0.256826484251004 -0.291771116113797 -0.56415449787646 -0.510364926844521 -0.962166908529373 0.388022833682217 0.098805256747187 -0.0807911265104851 0.830107473210775 0.99071984502121 0.896033740203124 0.83728831612451 0.581475879478068 0.499082953325554 0.597025033222506 0.700252762171813 0.696837316293064 0.702579588942769 0.735718084774064 0.656174640782637 0.64196285821598 0.751895108291616 0.603254774783678 0.403283078758231 0.593857353659447 0.729635699294419 0.0740993825640478 -0.491836941313926 0.364395031027346 0.377796205278653 -0.554292020067069 -0.628254127249983 -0.310743555781807 -0.00454252883263394 -0.223111032647958 -0.140134189199905 -0.315403808348818 -0.448918654012875 -0.308561754750671 -0.226291901124767 0.165604797289908 -0.0418399244719009 -0.0200257095539394 -0.0850852218260997 -0.096035593773905 0.151360563872957 -0.132346703833083 0.0316578333282813 0.101932449289427 -0.0409231390233538 -0.0153850879566005 -0.0358402552449223 -0.0149777704925065 -0.000876380130111465 0.0700938607055862 -0.289221061049139 0.0885295597572681 0.196249702085332 0.18407291008386 0.40746875951711 0.380686382678663 0.311572730968282 0.335399436982257 0.456520644268712 -0.135206166541552 -0.143432023382509 0.130257359004615 0.135641865440233 -0.174902836164009 -0.0366934821930448 0.547940854326393 0.344655938236211 -0.516882619953994 0.158963094807172 0.772111644546335 0.741598279333228 0.553466201084569 0.497390104376123 0.844818873384061 0.811666470771397 0.605173172427328 0.81536183723771 0.8947890228698 0.838257962667099 0.663947196396939 0.874085390791877 0.892710021333246 0.833130946218641 0.872904685789043 0.883306337522268 0.871674934543224 0.848827924595662 0.848618943257474 0.835521235145067 0.940521558498476 0.981249403733705 0.964442841337758 0.983650679327732 0.986568243081628 0.982362664881681 0.950637792532068 0.977109592120498 0.981208589675256 0.960275620548978 0.916074301691807 0.98151786648016 0.973918345330882 0.888329006140244 0.822129706283429 0.958663725768158 0.927372051171199 0.665782588839257 0.695567322911743 0.854475210990344 0.823130222039315 0.686268791738007 0.715976107188878 0.645321823694127 0.51269425418014 0.256539537443031 0.176847530278331 0.0873120249480605 -0.181736183987242 -0.436345395328662 -0.483260708091904 -0.505675933194663 -0.11900229144805 0.444824882669896 -0.188841583746193 0.137901429274609 0.141902523756105 0.319111578796673 0.333521860803767 0.348259336497318 0.339520722166489 0.340529932304157 0.442860854537284 0.405286626559916 0.554671845389648 0.699619980852868 0.60985934272967 0.627609194278301 0.834865291486325 0.851591108662 0.831949761575277 0.870239192009703 0.885396505754541 0.805404191580301 0.778634572669784 0.35791412486632 0.660462509440835 0.805004637996633 0.610188573683051 -0.109909162096811 -0.859065705021586 -0.688451907245502 0.632547645829648 0.685214513310488 0.637316997629287 0.686463569056722 0.650588693794129 0.590750344505516 0.625874355147688 0.6472108151644 0.523566223050264 0.469368901767121 0.474854740377046 0.635288148326133 0.626411765489417 0.00365471422681158
0.523140727529214 0.653177473655094 0.648517785917429 0.699062567792911 0.617296819194095 0.776791309994475 0.726107005875176 0.705373765055497 0.740332295609842 0.868949719362986 0.823375998764569 0.737410417870992 0.758602963073326 0.754834407531088 0.690636469353093 0.669809547560285 0.549132148963173 0.488766148973461 0.430310809669832 0.267364329492097 -0.0759054577943807 -0.0210364350840884 0.164817825840444 -0.0804082914797667 -0.339585298403173 -0.314330441662737 -0.253177494058236 -0.34024536997826 -0.457402741122891 -0.439349030208239 -0.429005892690906 -0.298338120632304 -0.126896972151527 0.165285549430682 0.609779043314621 0.645554824863945 0.733063124964598 0.707091780247885 0.704283773543959 0.758380187080441 0.669647210342227 0.730816662976847 0.571757301809793 0.68347347103663 0.697503341387048 0.64852688850001 0.783991509010854 0.779412554404956 0.746387521519357 0.659628662202152 0.81793475158064 0.748470671362381 0.750396802941121 0.579536056632533 0.729306242517243 0.814797005287957 0.877585534864605 0.885806921894655 0.662313443898841 0.794148831174743 0.837181053841949 0.391132130222066 0.144949137085424 0.38262138265019 0.401107175451764 0.247032810292414 0.338513797085801 0.478918390119651 0.222946265199497 -0.621019257423778 0 -0.41023201843312 -0.114179963819218 -0.676341387295967 -0.427931654216112 -0.519006635172741 -0.767028474578799 -0.438927641814856 -0.53457777573483 -0.7441208275693 -0.611176572393833 -0.430390647101148 -0.36403450308682 -0.718401224133513 -0.581960529555275 -0.758280172735182 -0.489225034734924 -0.489066660093503 -0.795533105976522 -0.847433086744522 -0.67065686769302 -0.549620336505741 -0.759855201103898 -0.638540049567958 -0.658372599421222 -0.673296538871879 -0.670536407674518 -0.548795942822621 -0.622854714157209 -0.542606639522164 -0.65370470772905 -0.65452316189252 -0.478314772190706 -0.572902931549582 -0.773780354878613 -0.756858843973818 -0.975481531037155 0.13444505231986 -0.630083394567703 -0.714626306800907 0.706662469049026 0.987889705933723 0.751349005659392 0.714769641175203 0.262990940035044 0.154842606080881 0.328889511099467 0.526246218709246 0.48752560792448 0.444609848198792 0.658964196537606 0.483968147596777 0.378636012952144 0.720489034815683 0.454275085939021 0.114241542468366 0.363291117605102 0.636609935757181 -0.214976863593708 -0.772930467534639 0.0310234715502735 0.248844578104849 -0.668140986121217 -0.79871478912186 -0.504293146463318 -0.105442946478497 -0.503646708137386 -0.408462249375486 -0.411901503577518 -0.542123425269088 -0.450492878430677 -0.429160707359948 -0.00541350458856795 -0.159026887995366 -0.185251044831405 -0.13010991644146 -0.169163184723741 0.0874648919668057 -0.246838071988902 -0.116227153483424 0.0102375214386542 -0.0988370865444526 -0.121999164563818 -0.101599074197329 0.0115796169743505 0.0129042025258461 0.101086674143753 -0.266475950079884 -0.0108120040046946 0.0573831237453671 -0.0555213486965013 0.29584999680841 0.232621556192981 0.160429811433794 0.233419099320562 0.363134776649406 -0.362601489147711 -0.343857688881628 -0.0945996222359416 -0.112019221957671 -0.321582003784734 -0.175484303325422 0.504545107266572 0.159523221834695 -0.683258392031004 0.286870618470405 0.865421790488428 0.799320229431045 0.595269360168521 0.572673919248744 0.903264686176472 0.856372412109959 0.620885854525717 0.863525188245765 0.926605555239158 0.869618005125723 0.730049166599069 0.919541204592261 0.924953212519247 0.849315241896853 0.888395347221895 0.882356755834042 0.881987754219691 0.853495171499212 0.829156060668399 0.809670652696463 0.935400320114373 0.979118647350381 0.97260804239735 0.97774235794023 0.983487210732081 0.988573309284545 0.965513135734847 0.981350746156331 0.990587909772532 0.978466622551528 0.941019054586967 0.98792564805303 0.984588790666573 0.916032605593586 0.825443672344918 0.971019822309269 0.953118980450661 0.639311852357 0.643454916348815 0.883048812773391 0.848087923650709 0.56707792417832 0.639287183356124 0.56785046257541 0.239607790111651 -0.101181645795102 -0.154723786080915 -0.179234049927044 -0.510926948996489 -0.626209422814231 -0.594665959788521 -0.620225210353206 -0.408378354020584 0.192795739528078 -0.301398348044044 -0.158103178438153 -0.0823079493407341 0.124991034907344 0.111782669812238 -0.0611086859824588 -0.0566015783481771 0.00722336592017221 0.0931814912340522 0.0112556467812566 0.261578072950986 0.546213249795802 0.35649958893569 0.430210450678967 0.820540243847952 0.828065322701437 0.780027460383186 0.858136892101472 0.889873968275039 0.677227319866058 0.612159372876262 -0.419721043070511 0.218373521957946 0.635559231216422 0.0849325087791086 -0.806379267436857 -0.9448948415214 -0.867000438082086 0.429190502424458 0.507365797026535 0.465189521917561 0.531624115737146 0.503873847360123 0.380626574062093 0.381352312948091 0.47049060469329 0.349293562936041 0.238246536248854 0.250136749693666 0.455570120998008 0.468843522831716 -0.106187024190457
0.178473914127749 0.427799694122465 0.386018407312408 0.364117510736579 0.258809363434716 0.597136180993546 0.49317964355061 0.354881540467855 0.449065376868015 0.739817711406026 0.651667403762419 0.432972014912841 0.654754059165276 0.677605281804374 0.566717302234403 0.576642050524659 0.512892479374707 0.419484475408244 0.279940034439887 0.176450462875518 -0.111750631607837 -0.071931039034356 0.18253056290653 -0.0174964906572598 -0.33368463715137 -0.329451593996224 -0.197996504072654 -0.218912670138495 -0.378677471879179 -0.419952597369859 -0.384431553946103 -0.269361797308553 -0.075476800886987 0.278567028405197 0.64533309098527 0.634627182641549 0.6852164176158 0.669201269070003 0.742341508889408 0.751875943977797 0.652137155905568 0.716407884167528 0.578583587804316 0.616801363800689 0.657887519987222 0.660829383401002 0.725505979256869 0.659440716632894 0.740396714905128 0.727858756313357 0.766626453743441 0.747462055205832 0.757518891937648 0.703671994521701 0.676640881108541 0.738141219123609 0.813877660600058 0.823675648504521 0.436276797953209 0.470798453776656 0.539763981063101 -0.0334506692240305 -0.407142232983284 -0.191433594402108 0.014355845449007 -0.260668299810588 -0.111823075167068 0.298742949663301 -0.0646977281282629 -0.11824127233624 -0.41023201843312 0 -0.610610148970461 -0.554325832428416 -0.14738819782784 -0.166951446251563 -0.418023091369893 -0.192339497740105 -0.473441811028283 -0.528930840379801 -0.301184220417321 -0.489904200444281 -0.339069469426261 -0.511212177582546 -0.521158483900617 -0.715979013678293 -0.282056834495798 -0.254457486927223 -0.678339256531793 -0.769558868850057 -0.536926368600627 -0.409812985263722 -0.653328050134424 -0.450150233569157 -0.497157440044686 -0.512034343868476 -0.567959631284084 -0.399905596804216 -0.414615589312549 -0.315850270140462 -0.530613742348313 -0.517023505289444 -0.308594109512728 -0.429288068016236 -0.744836698116923 -0.732056500667731 -0.968085970127997 0.0485622620337618 -0.730579060111095 -0.778991346155827 0.639765111554634 0.986859254509319 0.717947102694714 0.706377090561182 0.265045169302364 0.113768823096584 0.220933031816523 0.47125333092226 0.460223957524814 0.410281403233227 0.597606812245232 0.497563580275747 0.384815501874177 0.652572685280857 0.414848998840144 0.214362216158208 0.415606158397611 0.623803172350209 -0.0966146451201016 -0.612963953082662 0.132693312704021 0.292668287016952 -0.57354070761283 -0.745632984701203 -0.249434127660195 0.269304846428694 -0.283554836735821 -0.200179162980921 -0.113508742698357 -0.353827781311066 -0.348973493466122 -0.349746547914084 -0.0520693484761724 -0.234030696204291 -0.327668643121363 -0.272609175148924 -0.403105829369741 -0.207447161340632 -0.566894600171499 -0.429256738496774 -0.262943974664982 -0.451578623002006 -0.512971254396486 -0.379678181736169 -0.240086983758694 -0.390240412362237 -0.288764600580713 -0.574255312480561 -0.471074084705232 -0.275460713903046 -0.447561891406618 0.0362026965440915 -0.126153961360796 -0.0689752749581836 0.0223515229623928 0.119244414729922 -0.380146175776686 -0.31219644153872 -0.17710858428067 -0.165237811198102 -0.218934249795422 -0.00627574784731028 0.412524308865934 0.141392830466111 -0.378555193958708 0.492588408579873 0.845095569609731 0.693468357234182 0.535703972068411 0.567778650543015 0.855770006579753 0.789439452091987 0.569053095295258 0.830374538213278 0.878027676080262 0.797558750765391 0.70116746586908 0.915345590466972 0.895464593890369 0.781082405544089 0.877146075370432 0.868267852987331 0.825780721624001 0.822178554860753 0.84325294455317 0.819049813168479 0.935821597621033 0.971124515434221 0.982030130242013 0.967870356094068 0.973906243697675 0.985569651834818 0.974622897154777 0.982407508141506 0.988890322527639 0.9825847203471 0.950920329824904 0.987017735969597 0.982222503909309 0.92752129579125 0.831979454600931 0.964095749721697 0.93803219164437 0.581487190386196 0.445546444468037 0.836341490429984 0.806258800813686 0.273178835728275 0.353897553380859 0.293656164788679 -0.124842233884434 -0.3744040987283 -0.385611782896091 -0.320590584522491 -0.622187633207127 -0.714767650714571 -0.638321910458828 -0.657996847033479 -0.552705179043447 -0.114836867643789 -0.432325723687191 -0.41290517707999 -0.266624744044678 -0.107866777929716 -0.21652159485572 -0.498667177195248 -0.438833309690562 -0.344002862492457 -0.37635519895436 -0.460264210821503 -0.234253533843205 0.0727239661171332 -0.187672135361943 -0.0193171421966603 0.633493884515386 0.717081307423869 0.667623118878209 0.748135963877478 0.78708390185891 0.442458319288006 0.312488970539057 -0.724617663495322 -0.267339447363565 0.236118399763753 -0.541293304813536 -0.916218579382244 -0.969977507928487 -0.916668081787129 0.343051470297997 0.485254206380888 0.487988021105861 0.508898675704375 0.492630851656351 0.401221428497263 0.426667855756338 0.49485159228298 0.344185804272439 0.285700652791235 0.303826006125708 0.498264574403474 0.505724937179597 -0.109781105634077
0.332424386786284 0.602401636859469 0.561423672635033 0.677411973939701 0.515986960963026 0.771172373278777 0.689988753293685 0.692597691832459 0.738750549291831 0.8678958262813 0.842961324885526 0.718933587424033 0.832437651218363 0.85810860297636 0.801174016332981 0.799054758807604 0.804648640710737 0.755696752467239 0.626271005839166 0.519177863850205 0.322348099691758 0.314801522147216 0.461061258440224 0.295937929487705 -0.0486039211061126 -0.0466348600498649 0.0379642708515274 0.0476074234284557 -0.128270428983068 -0.207725384534952 -0.226740563725152 -0.100591247293143 0.100251511473224 0.377414068858144 0.687988548369633 0.686602017365771 0.740602900965916 0.727045535230286 0.789328112182391 0.79253131246856 0.710490085515523 0.751350925092334 0.654687754673355 0.699735143615836 0.760031175987207 0.752123872201815 0.764604601949934 0.761721993367104 0.821298019532323 0.82404009624502 0.833926789765766 0.897596274011803 0.889192209651333 0.913672612178339 0.892546868767998 0.857470012442179 0.925011996122455 0.872795286200159 0.552795860655469 0.717949173512981 0.678110551443259 0.0279687726680893 -0.331455127763074 0.0512541838507876 0.202163891676616 -0.17657816619974 0.0191467900141701 0.442955332351371 0.170209427819953 0.292097432848463 -0.114179963819218 -0.610610148970461 0 -0.400118462907165 -0.38785968383504 -0.431058881764133 -0.443650802395922 0.0546467507226291 -0.618297545610839 -0.77395237077802 -0.10622403667764 -0.388849202241566 -0.459823970821327 -0.606937665169131 -0.559007145813612 -0.769224877985746 -0.3239421979205 -0.164578137166279 -0.627375620100869 -0.752685405044407 -0.466146484048842 -0.238099252498323 -0.559625835993497 -0.328139769799886 -0.370638136558504 -0.3839817651825 -0.461509636570838 -0.254239814215215 -0.252129481905639 -0.139350252777593 -0.401752342831375 -0.397460746711251 -0.16847409784372 -0.293731640107752 -0.668320854206846 -0.685960430040714 -0.966475235225223 0.0528560296063198 -0.80631230804268 -0.822947291553989 0.530698256979944 0.984037005663753 0.679915158677666 0.741961683764823 0.378566708918839 0.205788737349227 0.334919576106359 0.590335722255247 0.572653408084772 0.524705865933744 0.685248822237283 0.614816927982148 0.498715393863263 0.715881791792792 0.543315148531499 0.394120602828608 0.54934638920434 0.678379576103573 0.15053992005661 -0.538138492424538 0.16766018734405 0.328690812728893 -0.527053210885818 -0.773805064802185 -0.491643002798359 -0.240190340559919 -0.729300384399316 -0.657958994516305 -0.619909113069391 -0.753434343643117 -0.763844246134994 -0.776468101178677 -0.574146482466565 -0.654733776383997 -0.678830468957431 -0.630259414800133 -0.724923145961871 -0.590745100653916 -0.788988898829221 -0.75785799244848 -0.643429779803815 -0.701009052057123 -0.765279596031621 -0.733087619506369 -0.514113792802296 -0.532117356389317 -0.40268626819845 -0.6003713554234 -0.559307611227756 -0.335803422454902 -0.608396314989287 -0.149545363734854 -0.593533912313053 -0.559396478755995 -0.548138898590254 -0.498251732207917 -0.757133793928553 -0.690943572026073 -0.550832666200011 -0.542256474652596 -0.577634455971053 -0.359093310056182 0.200597502730772 -0.220918825671587 -0.628198055123367 0.579620934248864 0.897366605939817 0.713903217270185 0.465068302738833 0.667607177657411 0.89718181381608 0.800966929914412 0.598180710316239 0.908375676367054 0.920830247670706 0.823591613274383 0.783548359286305 0.951928456821643 0.936729208869874 0.835666599407183 0.916811292258229 0.91540055198236 0.89655947779821 0.867531023150874 0.891733345760401 0.866629485881553 0.953636209599462 0.979222347311726 0.98942124839572 0.976403942714788 0.981748585090658 0.993760551245038 0.988270127806044 0.98861684554222 0.994857492680643 0.993178975438058 0.982215516367602 0.994002362852212 0.992037794718276 0.970236497460813 0.919257243603853 0.982224872562591 0.97282307477251 0.821236461581917 0.690404697086791 0.915803251897277 0.887617206154662 0.383353326075508 0.318043691953593 0.164768769650276 -0.32726517794163 -0.544027239389215 -0.61551468983026 -0.468390647802662 -0.758205148464709 -0.832399990449951 -0.756517555027812 -0.77248460169406 -0.710498954864683 -0.25590019231449 -0.493708503108727 -0.536300821357471 -0.324871197453451 -0.166429714003874 -0.287182264139007 -0.557952180476259 -0.509625664546269 -0.418587753408636 -0.435062697462234 -0.493959578672652 -0.297388057603236 0.000372697586222098 -0.225653739491057 0.186619005932004 0.760092315371598 0.783181513377653 0.72041884864019 0.822927965866421 0.880359041442961 0.678958547400093 0.561432331902568 -0.680230773436196 -0.119552162656384 0.444500878268565 -0.560826892803866 -0.916807807208598 -0.977331915801644 -0.938499313132945 0.326639103396728 0.548890258636343 0.5499998443392 0.61263441230509 0.587903818646662 0.547357202451027 0.552512900777382 0.614844616890053 0.503919896096643 0.4845748401917 0.486815158099318 0.580445920485346 0.61890711781801 0.00436215492481329
0.466229083817773 0.675019933730697 0.582882443472308 0.776207227093367 0.695945869119363 0.804782715411096 0.723774203795646 0.804599676855425 0.827611656797475 0.890294519422623 0.882110317930459 0.835740995954383 0.878200750936919 0.892166035407945 0.867389743424169 0.869215300537714 0.846876504785866 0.802610060672966 0.73746848494311 0.691557699856023 0.439175852964345 0.452226718730434 0.634084839877408 0.464868630184105 0.00454718953478559 0.0858726796581258 0.205985622791208 0.116114729068348 -0.125046956792918 -0.103295678007118 -0.133481651037182 0.112657053398343 0.346459733507331 0.566996272617451 0.816284709492013 0.802091472024073 0.83308991762576 0.836110855533065 0.891097629805436 0.880489575701588 0.84287333708745 0.864277289617557 0.807752759703947 0.850407565383205 0.869887288108498 0.869299426438585 0.877104340699099 0.871490071861799 0.890700421781096 0.88456683693755 0.890865028877913 0.922114205217814 0.906612922245758 0.923715346148893 0.939422632437367 0.910093587535044 0.934795068288491 0.861957060503901 0.680920793697954 0.779053383803638 0.629712810612075 0.076543482380551 -0.114055145508093 0.156566257221341 0.0198126853407704 -0.121217039033455 -0.0796439551335984 0.0514091591514483 -0.43471820245684 -0.143134142221165 -0.676341387295967 -0.554325832428416 -0.400118462907165 0 -0.619930877166726 -0.236465160331055 -0.316112012008482 0.703374697973129 0.2343929643589 -0.267093296354033 0.390489726347362 0.552609148296655 0.463367375687137 0.144352451213305 0.212908783709823 -0.310100107700733 0.463758730099159 0.371957312455852 -0.276055559804525 -0.519767694600003 0.106961164759378 0.247258499314363 -0.16491523644926 0.215579947532056 0.0402192868814461 -0.0762479634085695 -0.111387467465643 0.124438495339857 0.0173198322696584 0.15396549395303 -0.107670502477704 -0.141311201268679 0.0401305088253626 0.00439837583853247 -0.4912604296933 -0.460699537031209 -0.961456700559719 0.353602326891876 -0.460348380822635 -0.562688141544777 0.752826858408415 0.988296383156156 0.842169440990799 0.831596198041177 0.641558664681695 0.529849230377906 0.61745270680539 0.777473227879044 0.779999097497944 0.738614699402173 0.827605833695423 0.819218910066867 0.769615765600973 0.869684305625227 0.786654716622017 0.728177252228703 0.803555264062745 0.860006310547034 0.512889677404671 -0.294991700226845 0.671735931434907 0.546671707350726 -0.431924823895068 -0.650078455103643 -0.332464633975074 -0.0402113751262415 -0.564517474912787 -0.442984218619498 -0.558167780178197 -0.703482874591711 -0.647769514455789 -0.571773033926372 -0.114039385354583 -0.383726838731192 -0.424384741196633 -0.433301845668921 -0.56247227456289 -0.340264747655533 -0.605511193314859 -0.510027208159916 -0.402849465092657 -0.582319529358197 -0.586735402545698 -0.566287759073317 -0.429772295989478 -0.497571745007593 -0.434702969059681 -0.708669456591783 -0.286414216824132 0.0713956003107832 -0.126237921851053 0.476832401624171 -0.0470775076479536 -0.089261742665699 -0.0695355183225493 0.162330115189019 -0.575292401898238 -0.483283075824879 -0.164650413177294 -0.119583675782567 -0.329993240330951 -0.00245440986135422 0.722369227598709 0.433949860920181 -0.48242264585327 0.656456790239027 0.9426076364963 0.895190649015749 0.751030350357161 0.802928887634479 0.939967580473239 0.903168290002472 0.837357763626477 0.936020613873429 0.958997009863748 0.905023513121122 0.885728943502416 0.965438559774977 0.966128376278695 0.913310210194666 0.950046964506269 0.956857633711116 0.94524557707561 0.918307163869367 0.925913964564976 0.91148352925997 0.955864533917581 0.981387144160147 0.99125863155043 0.981280355177003 0.984051802871793 0.995029918069932 0.989571391184419 0.991098706125205 0.99379135358037 0.994301806950705 0.983133163749437 0.994512645606593 0.992988015348954 0.98360202011413 0.95416278179374 0.98728930809525 0.988504335924152 0.944872105627791 0.925259557933395 0.965963864626873 0.956754887666976 0.881721706006941 0.863159986103912 0.813724724328864 0.610199613517088 0.0784472429905171 -0.0394990082643656 -0.0508247677892672 -0.400320386655451 -0.603912375091297 -0.600340162121015 -0.631523861876477 -0.411903167010154 0.390097476100765 -0.286972644620996 -0.114513229468539 -0.0689020354692257 0.104611134107621 0.0564086724893916 -0.136038024319043 -0.0561461766910935 0.0387886651181025 0.0922585557939202 0.143808465157899 0.605172946489705 0.790400265398402 0.667345896889649 0.808188186748253 0.912238911953676 0.887348769894208 0.838013588241772 0.904364763949854 0.928789739465398 0.842877922483339 0.802795773093948 0.0963046078503782 0.534030767578162 0.781966075698643 0.432559009780019 -0.761131012034953 -0.964286036641269 -0.883517049914429 0.66038127096866 0.747706837001478 0.703833737231478 0.754101680306069 0.71038290781106 0.678742287355306 0.665912643147937 0.712829588939323 0.600749388073536 0.556951725434996 0.54333904583437 0.625687102494588 0.659616386441437 0.031760076357612
0.011556301107339 0.343949343605008 0.105314047936247 0.144409427075425 0.0879898724043486 0.397025210333514 0.186996233795669 0.057180273703474 0.184729635758401 0.609917719746992 0.454840895524185 0.174284166539371 0.458015739208608 0.453635997625789 0.390157325531788 0.425167542301737 0.114656085656669 0.00987897205221219 0.00540816682825015 -0.0638447915964976 -0.427677832671001 -0.352064841256733 -0.00845282692307814 -0.241296795411354 -0.504417118401304 -0.484623943468609 -0.330951305389042 -0.400008632755289 -0.544123497212389 -0.538111738992785 -0.493313802180005 -0.34672139946739 -0.151636271919126 0.196883770238327 0.667208891312536 0.687967098465725 0.755979275788337 0.698215469791118 0.789668427577421 0.802643386978535 0.663687429063235 0.678195676404268 0.547114930401394 0.643547221493828 0.603419577214298 0.560127205411631 0.715987632739361 0.651034500036927 0.625789369532722 0.592145276176327 0.731439924640664 0.628010274826979 0.545868069042405 0.382284679727215 0.619599997545805 0.71166683151912 0.652573194402439 0.687527741612461 0.361702699378251 0.286198418072682 0.0952826798263627 -0.253259542885985 -0.51576098557115 -0.52453250693176 -0.391571700577569 -0.284777745624489 -0.104911866544 0.151071833232621 -0.328060984388395 -0.0755608488776791 -0.427931654216112 -0.14738819782784 -0.38785968383504 -0.619930877166726 0 -0.321206588355232 -0.584638715467458 -0.239008870255134 -0.290704608738379 -0.517764848956201 -0.453089559634663 -0.449508644216917 0.0134529080230538 -0.459480612581776 -0.534744293629666 -0.781251973411905 -0.18299740799755 -0.301369847543604 -0.744849355357346 -0.833805019989008 -0.603684732281542 -0.505210040576451 -0.732626688610392 -0.515426411861363 -0.593515012960149 -0.601411177809304 -0.65343158002619 -0.462576212768107 -0.536607378687793 -0.418677928798347 -0.601884595220164 -0.578988742816207 -0.419843758723271 -0.529200915607333 -0.806486397833324 -0.790045410597387 -0.974913316080448 0.153412631147997 -0.535822936106882 -0.694825690867527 0.758691681452186 0.989908515838882 0.790464077312753 0.726221460710284 0.261441335504811 0.122800122434283 0.223490446367465 0.461930942823288 0.488229991827827 0.391679623415817 0.597735605835657 0.480841403362861 0.397302504642312 0.701140115649741 0.406782080971695 0.167852855808905 0.427964172638942 0.65285323839131 -0.327350425942868 -0.729335061003849 0.255856377009058 0.292806260229883 -0.678932861498476 -0.755949992635748 -0.23099244250908 0.339986208012417 0.101256556652454 0.184069929539061 -0.0810115515538778 -0.293383221007674 -0.107452135348135 -0.0292092401178677 0.268577664895173 -0.0221854674317508 -0.0394449313039695 -0.166722525106044 -0.277367129879603 0.0394980959907834 -0.360110340690429 -0.149542834381566 0.136892502764207 -0.240859869793364 -0.238354715252297 -0.122623567889094 -0.0617717769471174 -0.192429934084466 0.00427098466856806 -0.566111633423997 -0.0244277381432949 0.190473841361067 -0.00906924665493142 0.512490185950118 0.234537361670734 0.245502722128532 0.326227328470942 0.48859813530909 -0.220072635532951 -0.179981978444459 0.044855751783302 0.068178834704568 -0.153213480455526 0.0486313786874997 0.688887679550356 0.454196745105756 -0.519573124874208 0.513026372896701 0.936948141470819 0.893382484042052 0.702143617571938 0.690488166031008 0.933122341269652 0.907620227210026 0.76294127400065 0.903501229382536 0.942251947430253 0.894017302002808 0.817345599344196 0.947556311932901 0.951494906229477 0.892145051476484 0.902098417126159 0.906961695737564 0.911272633586295 0.861521897570866 0.852839811803153 0.836148936691141 0.937820856515887 0.974981712764264 0.985737088959615 0.971925381320744 0.977794244925963 0.989544118291386 0.9826119182408 0.986468133117076 0.994053249918306 0.989233835085175 0.968420741293884 0.990705136740813 0.989847955523098 0.959598891903527 0.892290419479953 0.980934601971261 0.975918983649491 0.83791368505707 0.757855110171751 0.941644560968055 0.949687737392585 0.80681553914367 0.806626264141614 0.771799644497057 0.479195906494401 -0.0490529291875987 -0.072159274112739 -0.0551521246583707 -0.42764703972167 -0.5923782100506 -0.555919007677638 -0.588732144015383 -0.326097586648689 0.451291129822797 -0.265582434311099 -0.121036114129616 -0.0991693292745329 0.0597714664082264 -0.0212330279727328 -0.390242536777879 -0.28985171647993 -0.123486196994835 -0.225161600126602 -0.364248550600974 0.180134802865891 0.594845020603067 -0.0481332131166097 0.335217573542991 0.816730871941706 0.806817003234459 0.725981064037817 0.858276454970415 0.856187315488119 0.413505955112187 0.375151815977941 -0.759798208653469 -0.389315278045213 0.156154174087191 -0.588914273103429 -0.940381108371121 -0.976026797801135 -0.933922151230857 0.388918249411601 0.499626983439586 0.489782828645273 0.497165083461115 0.480755220552835 0.317835339362066 0.304284875231386 0.369721328427919 0.176972547107372 0.0647838995207035 0.0579355098666817 0.344009756051989 0.367369554263704 -0.159157654368444
-0.319590368159175 -0.0335198922460599 -0.242372398470962 -0.524716222952114 -0.449943350966799 -0.130783326274156 -0.273320165083018 -0.513032538081216 -0.404811180975858 0.31769826159939 -0.12412831968647 -0.464988205763643 -0.0385386451062284 0.0875871179602163 -0.131884293116271 -0.162989854522287 -0.177889915825521 -0.253130383646492 -0.358036403939801 -0.356612419898389 -0.491241685387657 -0.458251634347799 -0.219927999243913 -0.353956818930238 -0.538258419624183 -0.553359136471649 -0.385925484827443 -0.383976546301369 -0.511122304466232 -0.587372486414809 -0.503597826570207 -0.406844081947519 -0.261405010886557 0.0908933124420235 0.582003516938344 0.603057960006876 0.650847301357474 0.57370644490014 0.657218009014475 0.717335149489838 0.559168521988822 0.579247224995795 0.464472031678403 0.515854563050814 0.473148722580957 0.45566640762666 0.536998322241418 0.311790056392288 0.353453841499529 0.448376141135218 0.465418442296049 0.217674144858695 0.326200195888808 0.401014707425058 0.0194016615985222 0.139884349184531 0.195383572614502 0.152897513374895 -0.133764612520417 -0.212450798607878 -0.304868253265591 -0.460553071987143 -0.643335495245203 -0.667939385994986 -0.568196422311897 -0.386101274642834 -0.269762466847766 0.0267838512525378 -0.40033950614842 -0.155564357024047 -0.519006635172741 -0.166951446251563 -0.431058881764133 -0.236465160331055 -0.321206588355232 0 -0.660830782657113 -0.347303524529465 -0.388573138810782 -0.434448964884576 -0.30958590155612 -0.497200345175047 -0.2610412639034 -0.529517186746371 -0.598896826016799 -0.694506142972951 -0.132846134157388 -0.214313563250463 -0.684286646672593 -0.740276525210259 -0.516997883606186 -0.440534902341455 -0.673197159870328 -0.31862327237628 -0.50584482012122 -0.511172217823823 -0.520227542379374 -0.311785920350353 -0.382601038815227 -0.252540948668876 -0.47991330544583 -0.521826159025223 -0.275657601795869 -0.406562148003539 -0.72734902482977 -0.776241232674456 -0.967812933189226 -0.0260109171482202 -0.766785258110916 -0.830021041034091 0.590696987312987 0.988006839801389 0.731860449647985 0.699709303095052 0.084711374647116 -0.122340049858268 -0.0739759230211244 0.331699844837143 0.342889498176552 0.199033944274109 0.453862781745293 0.413609450529906 0.241520828391118 0.507447613772711 0.290787961398653 0.134700392606148 0.291079343420088 0.530465419088967 -0.226341011383306 -0.612987587669599 0.113503630039214 0.281484981715262 -0.561395380286941 -0.719059245472876 -0.099114681505032 0.420610406384822 -0.000178053448583158 0.0888176899815252 0.0602008621962196 -0.195648799986955 -0.154768406191232 -0.178974160865916 0.0112064035198014 -0.264874426784958 -0.343486434740207 -0.392051205905766 -0.605562912441494 -0.356362757974542 -0.661301397470283 -0.571233459823221 -0.291588369563652 -0.692876530378893 -0.752323002441561 -0.557336082510519 -0.288637724137185 -0.489851410656791 -0.246100837600569 -0.5838899382804 -0.444352573089403 -0.0822496943004838 -0.405443860570686 0.254156858924162 -0.319353594373665 -0.199434189890672 -0.097049305850017 0.0290525400380715 -0.436916451274222 -0.348331268558291 -0.212578983961799 -0.157732424929695 -0.236391802785706 0.0406514881576703 0.509043140425918 0.23097330905858 -0.343425822243706 0.615637727026544 0.874411854044385 0.749362772758619 0.626193825940196 0.689035057669518 0.887988463405272 0.819494235228841 0.702249320945821 0.882365825960809 0.907389007971769 0.816740101060545 0.787411690254105 0.935852527697645 0.92439359031582 0.815589846367723 0.921641287707011 0.927353767087962 0.859516367094582 0.860959554011173 0.896657133985341 0.88059933231532 0.935945753111785 0.969854225316544 0.986616696258223 0.966637476077228 0.970732649189719 0.988107365256104 0.978140054936359 0.984175648899958 0.986512405077535 0.982746471259258 0.957590784078611 0.988059871299594 0.979397793297632 0.949079056872401 0.855503782015444 0.953814979132904 0.951963705268734 0.757480114343914 0.492443558930995 0.814965504458599 0.796449910162351 0.349756330480247 0.297073177211297 0.318360622565954 0.00698851430113597 -0.307547737927155 -0.315608128694973 -0.211385612686165 -0.495974139697305 -0.628188636094939 -0.605702320312417 -0.628764883452885 -0.494009158830614 0.237234796776821 -0.357931364323347 -0.378502833087485 -0.261727646141547 -0.12706884220112 -0.314275169572746 -0.593510468265311 -0.523016380863567 -0.40537939039163 -0.519204469075969 -0.56884378363002 -0.355003431726514 -0.230002095331293 -0.551143206886845 -0.248215628181203 0.485358999876169 0.397717270852119 0.282209270258529 0.469704407043217 0.471807883053184 -0.187449588861987 -0.177672852827631 -0.833699056941662 -0.763808394371947 -0.555092243585301 -0.834141567739226 -0.948662624537525 -0.983921748078807 -0.945531871992028 -0.0379669900338261 0.124681248570079 0.269249825222895 0.202689371147037 0.215140187382659 0.0644433504722334 0.112470651656974 0.0922592136591276 -0.0556448588600683 -0.0646989129985421 -0.0546873071469907 0.197301294625572 0.243033355611934 -0.200109669486929
-0.206429382416773 0.154738520646473 -0.069458789620847 -0.0979713595339512 -0.20325767710264 0.166629674621861 0.0134546158133697 -0.266262899061031 -0.145266082203416 0.504277869853243 0.299786989098181 -0.115793880000005 0.345115547261927 0.464926412792161 0.28010961388655 0.2809997629705 0.284381077257619 0.134807247061283 -0.0213803595449854 -0.0364868715847762 -0.275796206320895 -0.241004211030369 0.0906131652356916 -0.0932117618910241 -0.404297422421303 -0.398664829201797 -0.21713522420439 -0.238463951413861 -0.416485802914878 -0.477486500173205 -0.391807799751049 -0.26876032011558 -0.0666440873557776 0.312144612893701 0.766275591098078 0.770680130276497 0.817463943030611 0.804142068110162 0.85539839145167 0.879521252400724 0.784957023639477 0.807449126170348 0.764739475446568 0.805126880992705 0.769589416961958 0.744709694956264 0.815820864728935 0.698866710070581 0.695553918893027 0.749518177828421 0.734996761469142 0.658449851916896 0.552482767202719 0.689056248007802 0.590133118005348 0.530896901577279 0.41661052854357 -0.0788544686559931 -0.171894478511474 -0.235510890842102 -0.585668835410034 -0.589715340822883 -0.709853576233748 -0.727874909351064 -0.642772373043272 -0.53958670519806 -0.622950773239537 -0.518785978114128 -0.624441484025401 -0.389054199468884 -0.767028474578799 -0.418023091369893 -0.443650802395922 -0.316112012008482 -0.584638715467458 -0.660830782657113 0 -0.608996892115089 -0.112982018762145 -0.286565227631119 0.270830614782241 0.076493611982454 0.285497387471634 -0.141406066801307 -0.465252072167262 -0.661637340800804 0.548067107183643 0.358794556246897 -0.532262601542831 -0.630415025777875 0.152306854261702 0.150870855692272 -0.318662957191025 0.278367791367864 -0.00133140538908275 -0.193890433939159 -0.163130941846497 0.147209367121132 -0.0112668561972833 0.141277259177012 -0.132266522305648 -0.165742579771253 0.00271094284400183 -0.0598761507942135 -0.539822611732114 -0.611453928137773 -0.969670400168867 0.203834665237864 -0.729759557674261 -0.791991440763052 0.68152704745343 0.990001473930058 0.829016647111075 0.834015952936947 0.528833309955807 0.290104766310907 0.458504747380892 0.729712305358856 0.734577357164698 0.638050415685636 0.823137110586057 0.822738079614885 0.718347841051112 0.860752951694868 0.768124860869934 0.709510531913625 0.784785644387409 0.854612393366365 0.524730890753865 -0.221012540888589 0.696607384922754 0.597316786586443 -0.266888481766889 -0.556500794247998 -0.141719191219286 0.199158507323768 -0.287648866650639 -0.205772206361666 -0.347860082450348 -0.490033039048807 -0.404398815210966 -0.386533108623517 -0.107511773603583 -0.376308889210437 -0.429242311030541 -0.491439005932797 -0.686711988558029 -0.436836429798112 -0.686716200858618 -0.624456780111958 -0.419019763093418 -0.717993392400424 -0.757849290634541 -0.650377358773651 -0.421779808624126 -0.581432961677553 -0.480770834317557 -0.718137011021045 -0.452358299106599 -0.0948887243082824 -0.406474789996965 0.404038629542233 -0.412590354077422 -0.345542770948935 -0.271340310172046 -0.0893342687751251 -0.600099713093697 -0.507075400160959 -0.306936764745156 -0.224193284922164 -0.373546327805757 -0.00739700395683282 0.678243870880339 0.367708094872053 -0.480261368643255 0.786815424247323 0.955110261828642 0.908678951637066 0.798760410362601 0.863237333800402 0.955850649590547 0.917089140206437 0.875287318915034 0.953565043499276 0.967026801304262 0.918487651891667 0.906748573389988 0.97311878107869 0.969152866997309 0.921001942187216 0.953869788417468 0.950788901015841 0.941846094816858 0.920506608883332 0.921410575275564 0.905419194150064 0.959151301719711 0.982953815357379 0.992970074972682 0.981759485759665 0.984979547434677 0.996338612324692 0.992380819054172 0.992412372584305 0.996265514441086 0.995726881175688 0.986316589516878 0.995753887534325 0.994446000664332 0.982625611241621 0.933284473138671 0.985832549177482 0.990507366821007 0.945037714194025 0.865581889474419 0.953711959755961 0.948649565572777 0.837176394111646 0.742198531354041 0.713910205331919 0.43009750985358 -0.177742757889612 -0.262460303189998 -0.119460178401162 -0.457393240851333 -0.650014108850669 -0.618712982446547 -0.644822411455429 -0.485033450439732 0.472508091281812 -0.306113604203307 -0.239123378662861 -0.18636269260358 -0.0653262339344318 -0.224758952099659 -0.60362270918658 -0.488331176577618 -0.318098562298094 -0.467033271412012 -0.545518898807842 -0.125523136354129 0.0582225172731257 -0.48450239853082 0.253239938139873 0.842963379475667 0.699633453559253 0.551578068190871 0.781833318826911 0.785798841851915 0.26744860172468 0.301740792523052 -0.802291168281016 -0.672321776604886 -0.324490105060785 -0.818408011550163 -0.949696205707617 -0.983134829687721 -0.951255801335269 0.0869045866293079 0.282639573325528 0.415594704856179 0.410091223792353 0.350914400605837 0.252711835397398 0.294639635636896 0.284679333656972 0.110470919941564 0.105818073689538 0.102947273120948 0.294328089346313 0.328018966332383 -0.166468731757698
-0.220276033169368 0.149013083227189 -0.15129171734948 -0.123801612947464 -0.186850811049093 0.114656188624714 -0.053093200627803 -0.250511398747348 -0.119655838404984 0.471643817911957 0.259883113743311 -0.0564994732264361 0.334232804470679 0.411370098309179 0.321491362133492 0.338210002959378 0.149467510356058 0.00550404265459918 0.00788595058292713 0.00280552401135087 -0.427049033635025 -0.332129248140741 0.144799173538852 -0.133933775193289 -0.493571254718521 -0.465062935212528 -0.227066321347714 -0.28481885943908 -0.472782964381284 -0.510653859938975 -0.405996207129978 -0.211497155238795 0.000118714385780817 0.371410994690325 0.722650712839851 0.715606511091103 0.754657744154554 0.769452096242454 0.813733017332952 0.858313330788316 0.801091729464443 0.798789761337211 0.732165713563299 0.758043661710537 0.793029493171726 0.784797402767833 0.798155604491234 0.805588734863904 0.801901501556898 0.799014459732952 0.775000288890762 0.655067933102398 0.480560842607365 0.480561528557137 0.620970272906382 0.649959471020757 0.369918336049976 -0.223215724673879 -0.131674661739137 -0.189303970373305 -0.631991689236725 -0.574109710166328 -0.697900378733872 -0.734670932949679 -0.644409602410576 -0.433526983004373 -0.464833452143633 -0.398485762083089 -0.421669121988627 0.045188973294118 -0.438927641814856 -0.192339497740105 0.0546467507226291 0.703374697973129 -0.239008870255134 -0.347303524529465 -0.608996892115089 0 -0.313083117898205 -0.685603452522949 -0.497142705133018 0.163429769730147 0.369859666924468 -0.405545743504756 -0.495381134638235 -0.776839270159096 -0.131397215011055 -0.28973998949731 -0.791726221589348 -0.843449407979381 -0.630541253434199 -0.486088616581145 -0.761864275143871 -0.542015083674602 -0.646552431150855 -0.606216567527299 -0.620967445297251 -0.496656447199909 -0.551192825304451 -0.336096432114195 -0.61444372982341 -0.674841204535944 -0.332679654367844 -0.41248731846509 -0.76618292082819 -0.726703814879656 -0.968295116825998 0.270405367912113 -0.31108142021319 -0.53775107018314 0.792812824939684 0.992465242726266 0.879345174381546 0.814699670334544 0.475518567482984 0.327058959745347 0.474359610724955 0.667448099498671 0.664458002478348 0.634355780152999 0.791523450270719 0.751820287204746 0.672841248207309 0.828505594230571 0.637341880756564 0.421226122528214 0.675794033244016 0.780399993766975 -0.19156668781198 -0.675165634562321 0.4945983593146 0.409782309024259 -0.689965047925389 -0.676576820824383 -0.33471127974594 -0.0661732333209293 -0.211884072749016 -0.115755516079183 -0.342900595578908 -0.518195674811976 -0.328687868416892 -0.259352408716429 0.0270862067606267 -0.320704672853384 -0.261172847190467 -0.471684203793197 -0.629798305008508 -0.380420737831633 -0.593508370605149 -0.523288033185562 -0.16585531792397 -0.600463356182838 -0.609990541513918 -0.442440103462381 -0.289583726891514 -0.41069745072878 -0.147375479146512 -0.621111949694432 -0.182553829818572 0.0631744878450025 -0.233861129043351 0.452514349603689 -0.282611099479581 -0.280412058484701 -0.237425308026681 0.0575731696021413 -0.615092084322927 -0.564148694344012 -0.322108066567548 -0.275423730537362 -0.513712848820158 -0.385402009319488 0.62377799453088 0.194018982808251 -0.772447256453361 0.18654616356718 0.940826930701139 0.909261711860247 0.720850845727306 0.719804829185531 0.954146884335505 0.919912606579085 0.805913292600619 0.941928297789473 0.969541539033718 0.925815574209519 0.874680883648676 0.972770229036007 0.975718862543915 0.928644330267593 0.953006279886473 0.950262331814509 0.950038876910877 0.9226767139138 0.911589870066592 0.891891629781638 0.94481850092335 0.981201340901901 0.991613309779933 0.980123348799819 0.982097479417571 0.99611428242932 0.992720439211066 0.992660185544302 0.995232561642835 0.995402001211989 0.987288314995217 0.996501405029656 0.994761547567245 0.980558013874948 0.93994046861442 0.988940755847952 0.987556328462248 0.942522296358904 0.87690669284491 0.96335367155932 0.957199821214358 0.874598257591092 0.819452142879755 0.798594369947156 0.614564071505003 -0.0812809307481217 -0.19484323829983 -0.0756489705686438 -0.421176638338347 -0.649218346872246 -0.602730797785569 -0.643499117127921 -0.380130346457489 0.595136732881154 -0.252423969249342 -0.0549194127095726 -0.104887691625757 0.00155091326087418 -0.106141728983598 -0.500056612853461 -0.387461527305298 -0.19451448867129 -0.333699052906432 -0.417457649689083 0.109290544839668 0.359047024322104 -0.269349320737279 0.450476510265348 0.901717188520749 0.803034727476082 0.682892959741107 0.859582115540767 0.854686628664513 0.427206671538707 0.429568909576473 -0.692304261678811 -0.48246285231354 0.057804794231663 -0.623746647059111 -0.914348900130834 -0.976876841996959 -0.929266158608438 0.402591189198175 0.530114190566373 0.571048176821653 0.551445006937269 0.48381624414516 0.389119465471434 0.403920337011438 0.399269398085688 0.19127255592521 0.143508529654895 0.119240122439176 0.346176546342235 0.370507231521197 -0.116764774249323
-0.492791354339851 -0.366124737179131 -0.643609828292693 -0.707231574953684 -0.622259580241244 -0.562887411224339 -0.651005687616513 -0.710888656730392 -0.654203932746673 -0.109642062497334 -0.535550611351193 -0.668123335278119 -0.380658898756921 -0.327537822964496 -0.347076050076404 -0.283135554533284 -0.499283776971198 -0.571150330202191 -0.360720252822478 -0.306044421499035 -0.558943708943615 -0.477851166187281 0.0118393081729017 -0.194213263791746 -0.492747153659862 -0.466078696257125 -0.179530367560005 -0.213240350803875 -0.415026691225101 -0.4382783772358 -0.316543092481248 -0.124750183435917 0.0374450925769007 0.310747605426809 0.666082583914968 0.667217572105059 0.729218847858451 0.742911607759696 0.786711531646306 0.827783716495318 0.731080866314599 0.717932924445731 0.622561194483054 0.652673274612306 0.681384712292652 0.662385745145489 0.711994120824536 0.645909196026348 0.510164307216847 0.596513375073618 0.628431084364907 0.0659642682114114 -0.0769835486787706 -0.00741693398513073 -0.369466717721969 -0.0735214291291674 -0.463699321386367 -0.602125309158662 -0.435658612565279 -0.492887260406852 -0.707434432896661 -0.560502325162651 -0.776284540011437 -0.806010571512165 -0.681626306753468 -0.426481548257622 -0.392911459371646 -0.210095783835257 -0.350724453341818 -0.0190070249313826 -0.53457777573483 -0.473441811028283 -0.618297545610839 0.2343929643589 -0.290704608738379 -0.388573138810782 -0.112982018762145 -0.313083117898205 0 -0.572701914192558 -0.293495220463699 -0.35306438090541 0.374461371350808 -0.166818893099865 -0.258239022384149 -0.654193258126451 0.106878486213494 -0.104771913150304 -0.621949002570513 -0.751646957591198 -0.665511794317463 -0.46007476381197 -0.679207741231201 -0.436868153347516 -0.580753453334533 -0.521537343696063 -0.497670496614346 -0.382019828314831 -0.502317881401595 -0.273483340052053 -0.537330759580403 -0.572652771277053 -0.340343124414347 -0.424953904507435 -0.779826711124721 -0.808842337576795 -0.970514975535938 0.175663069702807 -0.392139999564986 -0.657855820262948 0.798091633761276 0.993158121332296 0.85606403452495 0.747855407328848 0.225907571487965 0.102168692933813 0.0833483423754886 0.365760219160769 0.440274823472982 0.318843827039158 0.421180347426481 0.346603918442149 0.323725093476612 0.523566383356013 0.0705753616012982 -0.0304993893981912 0.278453071139597 0.252453733256406 -0.69248900598094 -0.771307568730018 0.100805620796462 -0.0280439786219676 -0.78637656540814 -0.739683108655148 -0.0682944268732307 0.313467193135215 0.349703137382433 0.200528062379364 -0.118925635909204 -0.292796172580639 -0.127915567514419 -0.0141271010684849 0.102453362598248 -0.315049466179693 -0.228603743038094 -0.52373465874569 -0.704077451880136 -0.539614119422363 -0.651099989570881 -0.602669316036105 -0.308807132737721 -0.676724849264853 -0.662491984043479 -0.492489671449169 -0.392451193444742 -0.516270191999989 -0.28426364740096 -0.579348203984285 -0.260160619049823 -0.0547276176703191 -0.301540535292268 0.330024885825001 -0.547523238372787 -0.403556882106845 -0.321330550582525 0.0515091816897671 -0.544724423245267 -0.490573392322007 -0.254747806316615 -0.166402819225435 -0.375437574643177 -0.220009136184694 0.709744629516815 0.438469004673057 -0.628517466740165 0.427783034523751 0.958187265904673 0.917089793275191 0.790562490636826 0.776325958105147 0.95980694893039 0.930124796779955 0.851220640397688 0.943688267423267 0.96977855254387 0.929967535960608 0.893568673559401 0.967968252089121 0.968507133348489 0.913871240249483 0.938467734050968 0.927712069359868 0.926630014494109 0.902118428652807 0.891632462801505 0.868519685152213 0.930603912653929 0.972622460221144 0.986926546810581 0.968803919223684 0.973922249378607 0.991994729140854 0.989732754267357 0.986390396001984 0.995372861657851 0.99403665119474 0.981014411842784 0.992185194903942 0.993396070068213 0.97943444787853 0.933769327924617 0.986749407852733 0.981105157893152 0.928806380625756 0.806822714126544 0.944316194101352 0.946824540261627 0.854754181061099 0.765550460243518 0.777176632057547 0.554821166184914 -0.131181297919827 -0.206581377896703 -0.0699613266210249 -0.423866712275858 -0.671754576194093 -0.605672292801775 -0.644488489417445 -0.425765746180549 0.585712909966002 -0.267740918857946 -0.133231395944748 -0.163669645022184 -0.0702752923902634 -0.264621281226235 -0.62015536240724 -0.482801310357156 -0.315878930096053 -0.531210019460712 -0.615117820089836 -0.144919348545414 -0.00844016433235642 -0.555140823393594 0.120215581803594 0.840326015793938 0.663181095435657 0.502611029002061 0.776073739304835 0.675101332372728 -0.135356242490762 -0.0214438530880117 -0.801829959512776 -0.728753787545909 -0.518657761446305 -0.833813576275223 -0.949205007180523 -0.9778045068228 -0.920918187460001 0.399904838697781 0.480421714886381 0.607886031398366 0.521189617459719 0.443640300228206 0.3534786897281 0.368670565460537 0.284696671328615 0.0826639918383873 0.0766996266717468 0.0456901754429737 0.305268175237127 0.289587144962333 -0.0795718227792529
[truncated: 969,896 more chars]
