# Supplementary material for: Dynamical Correlations Reveal Allosteric Sites in G Protein-Coupled Receptors
Source: Int J Mol Sci. 2020 Dec 27;22(1):187. doi: 10.3390/ijms22010187 (PMC7795036; doi:10.3390/ijms22010187)
Supplement: Supplementary file 1 [file ijms-22-00187-s001.zip › Supplementary materials and data/supp_data_2_correlation_distances_delta_nma_gcgr.txt]

0 -0.197930216380427 -0.795999859518786 -0.987741266061554 -0.489570162115666 -0.744205422330373 -0.979654796571608 -0.956351013443969 -0.52138136978409 -0.951191012532794 -0.947287268324654 -0.962923055171018 -0.970468019034043 -0.964600777608715 -0.905912262787554 -0.938360830397906 -0.915729526420832 -0.956876738642645 -0.92653456067854 -0.692579370039543 -0.965503896561191 -0.927688636183425 -0.785812788286402 -0.919974870915636 -0.93289322670251 -0.852889765893419 -0.624683826489457 -0.951705015805371 -0.921341130469881 -0.788525320742691 -0.920704218087873 -0.972232489375118 -0.79474604742931 -0.329385193550085 -0.469287915310932 -0.394812408512527 -0.835606794083026 -0.980613337886164 -0.980816424053254 -0.980491073630891 -0.986349254612919 -0.982472436486396 -0.97266947661825 -0.97791996991212 -0.984043055623073 -0.980495806582185 -0.964168355929606 -0.972545343775667 -0.981280521326854 -0.974877730423883 -0.969433290349582 -0.971060351706698 -0.970997076076809 -0.9739191984839 -0.954726872318142 -0.967898700991094 -0.976765278187546 -0.966251767654708 -0.945941494168674 -0.947024825507232 -0.971942436556372 -0.951907910467221 -0.910681596461297 -0.919633370810728 -0.904815841340268 -0.819114439980408 -0.814728578111939 -0.71476854009641 -0.0184179152304525 0.971055373806884 0.171728775922123 0.982444579802184 0.993449243394746 0.995794913247272 0.996091050789955 0.996680953261711 0.997010085502783 0.996757243374879 0.997085847791833 0.997040245112873 0.996500142746542 0.996395224791836 0.996384774300406 0.989837166148427 0.956459379342267 0.96976140307526 0.0532815536486577 -0.485221931803752 0.930841329203189 -0.864744465967811 -0.907312744250224 -0.816757739641922 -0.954150192721118 -0.973083911983293 -0.975570894849902 -0.975906905660839 -0.984771080519138 -0.986677401255855 -0.986840783457568 -0.987938815736443 -0.9876251206884 -0.988218017298142 -0.98942520652891 -0.989905439634659 -0.989188285356389 -0.989688771576022 -0.990368929593545 -0.993328488699668 -0.992383044542295 -0.99229652258125 -0.992610457428539 -0.993466597901803 -0.99247973035386 -0.992267675627097 -0.9931371261486 -0.993093241951914 -0.991817381762589 -0.99299408727568 -0.993398024981954 -0.992844773931312 -0.992450519185064 -0.989701967180911 -0.991087270537633 -0.992731922819664 -0.981974985579507 -0.988092255032521 -0.987212901642796 -0.990053506315777 0.935195062846863 0.333505340673959 -0.992441479424624 -0.984412110448081 -0.987161108123473 -0.986200487649251 -0.987703429574138 -0.988336597958955 -0.98746602443442 -0.98626914571477 -0.983846096822466 -0.985625565106294 -0.986752118489713 -0.989339408155844 -0.988614530853814 -0.988999551385795 -0.987838386588111 -0.990271788465312 -0.989092198457784 -0.987655978173099 -0.985509638230028 -0.989486302884529 -0.989758597466074 -0.981400567538847 -0.98377875978739 -0.987393398890029 -0.986375558169423 -0.975233274049501 -0.976480979576477 -0.977650995398553 -0.977854426597584 -0.973352477695008 -0.97422146652852 -0.971676746118578 -0.959647129427847 -0.97175096074412 -0.983382675777608 -0.990544443742669 -0.98134498402049 -0.992502598771626 -0.990115864812356 -0.993466170171645 -0.987224071587907 -0.836833097338085 -0.989868567591879 -0.992770533855577 -0.986623162776964 -0.985332397153976 -0.990240669891458 -0.990715600968077 -0.991500263317339 -0.993106467534216 -0.992286279658561 -0.992697242398477 -0.993903141460925 -0.993836181566262 -0.993321800326454 -0.993337370155916 -0.991706023470609 -0.992639289606064 -0.993206109399504 -0.992107994460481 -0.991893333447679 -0.992382877568378 -0.992796116656551 -0.991278051258957 -0.991116093009642 -0.991879083006768 -0.991353675456948 -0.99178147471588 -0.992089203057022 -0.992459202276348 -0.991427920205575 -0.990668826229866 -0.992675604649799 -0.990110584269926 -0.989906629763717 -0.985535367201835 -0.95407810423462 -0.697621819606148 -0.611977961088215 -0.814501900212576 -0.983315473722241 -0.971824943703069 -0.972340198647813 -0.986818218334948 -0.980458884389675 -0.933701592398753 -0.961007939550502 -0.977698141120187 -0.900066797697524 -0.934774546162585 -0.984202918226825 -0.978124042584696 -0.69228888101805 -0.918297411203661 -0.984855810568004 -0.530807427988647 0.807706800321869 -0.969749050682124 -0.986097839561373 -0.977560133826713 -0.126474923822732 -0.986133003715944 -0.98972253006721 -0.642355891640783 0.905859251738631 -0.924583490448788 -0.958221311517406 0.498081779785113 -0.983380556463933 -0.949831887888665 0.960411855192353 0.922319917254126 0.894745223528299 0.773984771489031 0.834198871365513 0.904923884282646 -0.520433157124686 0.0682176943227923 0.932435314093687 0.408415376328186 -0.924286238442677 -0.807611787891968 0.471434836952954 -0.90040463904267 -0.970180388256527 -0.899616534481441 -0.913932197863025 -0.913260245218195 -0.949694464476214 -0.956938402384863 -0.946241416776459 -0.948094518359714 -0.954319397080569 -0.957007812452606 -0.965695409692588 -0.952437027299313 -0.930821051490498 -0.959494129090336 -0.964734634372556 -0.950702015251002 -0.735380605752013 -0.824428439163744 -0.915346055785692 -0.905704595265896 -0.937919023932652 -0.913802729992178 -0.798459319467647 -0.800763335438325 -0.797594893788775 -0.245370698603169 -0.134261571309705 -0.0890320941979215 0.108653750065065 0.542773478644432 0.744782608837434 0.0382365283483052 -0.476234911537726
-0.197930216380427 0 -0.618950774321551 -0.93398556986721 0.930687041660079 0.920046949032365 -0.812023323219651 -0.21308967643046 0.907934860752584 0.444130755347403 0.50641399487774 -0.819637053920701 -0.8799108957251 -0.895062645730725 -0.347920954647208 -0.694237377738878 -0.501795090463449 -0.879489918815311 -0.567118433003992 0.761753252732219 -0.911043042435663 -0.704854390548829 0.332706936852915 -0.686497785722662 -0.821672057180865 -0.433505158340736 0.498105501592221 -0.902613416330496 -0.81949502287971 -0.200223731931161 -0.812750317763688 -0.960736481112005 -0.507236325659456 0.33853737611203 0.213463104518124 0.279678148776677 -0.717822264334201 -0.978170044677626 -0.979970950304703 -0.976959675790196 -0.982959240224237 -0.977376296520997 -0.963010378089103 -0.971994987143874 -0.97943362907513 -0.973531383127173 -0.947319495633717 -0.962572179058604 -0.974568462168762 -0.962600349858784 -0.955948397852956 -0.961331986927151 -0.958140493839452 -0.962280013563124 -0.934095168146105 -0.95491572077064 -0.96717421764562 -0.952234556669152 -0.913000147464784 -0.908848710840744 -0.961539149903519 -0.928175499673063 -0.795838825911763 -0.789522584410974 -0.742328224985477 -0.476267161399411 -0.367016940236518 -0.069752528124713 0.542958429405416 0.97826184953143 0.0472695796172073 0.982127674909085 0.993094775170313 0.995754681694974 0.99613690218304 0.996736305878243 0.997083032233058 0.996805391038122 0.997103160974924 0.997099048323746 0.996707034543052 0.996605412047327 0.996731996167124 0.992803252823395 0.978997580317161 0.9796524965593 0.582907331850937 0.592068323090735 0.966309342632088 -0.601985549048908 -0.793549027527663 -0.319915867610687 -0.888080903510576 -0.960635917430954 -0.966040388697716 -0.963131253827885 -0.980620594668801 -0.984218440061074 -0.98402199889232 -0.985449892880282 -0.9854784543726 -0.986259489630877 -0.987652908617607 -0.988490216071234 -0.987769904284761 -0.987781478166323 -0.988325431607596 -0.992240315258132 -0.991277939135604 -0.991167783794938 -0.991358926865045 -0.992381557231536 -0.991243557795791 -0.99088079823598 -0.99198474354269 -0.991887672085599 -0.99027855464957 -0.991882055131486 -0.9924458969818 -0.991769134242408 -0.991305263747381 -0.987663377672554 -0.989320916904869 -0.99083212298096 -0.978827626747859 -0.986634658696498 -0.985731944809797 -0.989654997734367 0.939828259381811 0.506575809721739 -0.991961068900572 -0.982030242692201 -0.985430415547062 -0.98478749232796 -0.986223118034138 -0.986744787675018 -0.985999596182754 -0.984718061327185 -0.980942659059561 -0.983288875218129 -0.985200427192814 -0.9883269549854 -0.986929018510688 -0.987829902933229 -0.98702097297061 -0.989661713134955 -0.988846952101499 -0.986621456407835 -0.984550344170089 -0.988723976249175 -0.988955643385459 -0.980323763376427 -0.983615430874349 -0.986801115885836 -0.985782788960151 -0.975125743646697 -0.977334775308711 -0.977732090875619 -0.977074782170574 -0.970545031490278 -0.968019259223178 -0.955122681109829 -0.907552351005298 -0.956912036350013 -0.977868993885639 -0.98925226295794 -0.976645362392322 -0.991777780406218 -0.987700208035136 -0.993136708911476 -0.986061849297192 -0.734425489480314 -0.987757592361845 -0.992245652243801 -0.985810221340831 -0.983547812738085 -0.989075125144164 -0.989877398779325 -0.990854884874354 -0.992391967676551 -0.991480251612107 -0.991995615011803 -0.993256293781605 -0.99323451855392 -0.992870005869705 -0.992646280913972 -0.990690319149887 -0.992019257016674 -0.992584785844988 -0.991326000315318 -0.991193000230875 -0.991928939703734 -0.992189281633358 -0.990463112868499 -0.99049201239104 -0.99135721154968 -0.990717524820134 -0.991119883968313 -0.991646494475375 -0.992018933247807 -0.990895420179888 -0.990052374000102 -0.992227475827585 -0.989913443653126 -0.989994242408847 -0.985889889945222 -0.956872922428489 -0.739983394101198 -0.666542749954606 -0.86399068967662 -0.985255849533425 -0.976756704408211 -0.978084494334314 -0.987970639355594 -0.982648324642251 -0.950026088512912 -0.966712401710044 -0.978931117469466 -0.918501191074265 -0.944395418638613 -0.984000965196511 -0.977720037695018 -0.717886513346156 -0.916672825319802 -0.982203182606064 0.15463196554626 0.844953064606221 -0.967098255586204 -0.98408733322396 -0.975284656744055 -0.706914705118978 -0.987772636130051 -0.989482919661818 -0.755004704707712 0.718159254874507 -0.941393939140899 -0.961400866430619 0.0759604793297924 -0.983870922592334 -0.938927785149837 0.94118744401619 0.282539228616082 0.247460481357101 -0.518175234530078 -0.127079685519894 0.711823810809771 -0.817717403625279 -0.683472133484017 0.87559741093959 0.161252561711618 -0.924407509585851 -0.828772958078976 0.543576847997439 -0.837314976452623 -0.958650847942894 -0.813717523101003 -0.83397440676844 -0.847174463292924 -0.916438437495705 -0.925038552086141 -0.912901121629493 -0.910946697521275 -0.91047422440342 -0.928394168090805 -0.947712146080726 -0.913000678552681 -0.851650472291374 -0.934227655696932 -0.943495630814963 -0.906108609949868 -0.271835293195763 -0.612097877645967 -0.860556820754194 -0.83128048360582 -0.896928564085809 -0.833280876879957 -0.530754987618352 -0.539612010403271 -0.577401483680245 0.347187751607324 0.416582026018139 0.447663763066928 0.533902264933352 0.731463912174588 0.845434174037666 0.451312401357633 -0.224160129683337
-0.795999859518786 -0.618950774321551 0 -0.508268741776913 -0.665621172552135 -0.950048127339774 -0.970330621320889 -0.9625999887731 -0.852399740912521 -0.96472315126906 -0.958908963623708 -0.982385037469728 -0.978735437866412 -0.970724039548738 -0.963034457975698 -0.971927369223035 -0.917035440783273 -0.966640212303178 -0.965929915732653 -0.625213485699131 -0.971338304943411 -0.950731393664533 -0.877971097215924 -0.950069896708481 -0.957520419532053 -0.930227942590203 -0.856824151669616 -0.971707183785582 -0.956374258189301 -0.923375678936753 -0.963024941241794 -0.981388296397791 -0.912850553161088 -0.821241650784375 -0.889491776279032 -0.838361389320534 -0.92641884856455 -0.985087726737072 -0.984922206626442 -0.98452236125377 -0.986922301887144 -0.983577986120472 -0.977712836675108 -0.980612794168285 -0.984009694233465 -0.981346062123372 -0.97029116271612 -0.974591236913132 -0.980634426371236 -0.976229477926342 -0.973038258075927 -0.972242538420866 -0.972103878572014 -0.978254736261342 -0.965312852676508 -0.970894047378746 -0.980441733836972 -0.97535614745284 -0.956536478365214 -0.95951608230626 -0.981399924130638 -0.971398315281244 -0.936928585379753 -0.944672578083936 -0.933885143989088 -0.873757714414223 -0.821240136835366 -0.762016722012598 -0.0672714263168416 0.977328369134483 -0.859938709954797 0.983871197719029 0.993817576944282 0.996141606864877 0.99592662716022 0.996419488675746 0.997029742416456 0.996749755637464 0.997088718986102 0.997103160458768 0.996820274466164 0.996647522318983 0.99677767101882 0.993755610734738 0.978172597561246 0.973090594233048 -0.367067478733274 -0.0100566503406727 0.959559826692883 -0.788423920530702 -0.902780630330217 -0.800834388511198 -0.935929662436712 -0.968973949756001 -0.975551307941085 -0.974819281367982 -0.982937056718742 -0.985675091340681 -0.986444805519402 -0.987186192998321 -0.986548769498517 -0.987358515152346 -0.988907683465456 -0.989300180121674 -0.988507329324173 -0.988780280789931 -0.989365168560602 -0.992542539025078 -0.991645149731557 -0.991726279899619 -0.991865617335154 -0.992744120184164 -0.991774453804981 -0.991636944930605 -0.992502883964315 -0.992386378877402 -0.991214924597565 -0.992620143510068 -0.992963858441175 -0.992354356522538 -0.992244390152996 -0.98980509421949 -0.99064410250788 -0.992200261867533 -0.983018400525556 -0.987911699851874 -0.986540631468655 -0.990201818982434 0.892145640991673 -0.493097266408296 -0.992016727793045 -0.984312205307363 -0.987152085347257 -0.986563956080212 -0.987166007938665 -0.987860852723834 -0.987325658001298 -0.985903691012335 -0.982826013922111 -0.985156261418675 -0.986479424485395 -0.988876092573811 -0.987783593292818 -0.988436724918119 -0.987796500773408 -0.989909802137696 -0.98913169647765 -0.987274785867406 -0.985800976796753 -0.989034502332136 -0.989149438211576 -0.981667592668812 -0.984300764945948 -0.986739321304114 -0.985643199731078 -0.97631325203566 -0.977693647369315 -0.976791434654599 -0.975807056135775 -0.969273677807883 -0.965513269328029 -0.953069663082077 -0.916783406767634 -0.95796644355103 -0.976888031861802 -0.988577374935892 -0.975196261199246 -0.991486077806698 -0.986801352502572 -0.993163368679627 -0.985792601385077 -0.71834707780214 -0.987909045957524 -0.992386498524391 -0.986256495710074 -0.984409507414386 -0.989574305865656 -0.990298555781866 -0.991235204712939 -0.992726147518556 -0.991926646974765 -0.992332275092551 -0.993491168447394 -0.993489660531121 -0.993110703425625 -0.993005945660252 -0.991253464155391 -0.992464506706386 -0.993076254804951 -0.991882459188104 -0.991736125388579 -0.992321732698367 -0.992710484402727 -0.991179130418234 -0.991052287563534 -0.991869336656384 -0.991297897680547 -0.991804284023514 -0.992045404972491 -0.992403923686242 -0.991622203570491 -0.990829082958269 -0.992761126143071 -0.990467067087903 -0.990400666268979 -0.985777291761072 -0.950438720918194 -0.620418983884523 -0.487167607458392 -0.820037674497141 -0.984797913538311 -0.97520737872325 -0.975342164794595 -0.987664841402313 -0.981879829717635 -0.937651036203552 -0.962323817803701 -0.978843035691741 -0.887041897240215 -0.926002726200024 -0.983532227296365 -0.975615478247928 -0.444196279544678 -0.881445570663524 -0.981915834900058 -0.0148829472530894 0.830688038351644 -0.965376181812461 -0.983748233599254 -0.975998658920261 -0.286033248920191 -0.985804692484845 -0.989595468347126 -0.610465028046926 0.899183434858733 -0.91454378531605 -0.954231749142601 0.60159906105732 -0.984581895978413 -0.941604527655883 0.97460838439453 0.878378392234229 0.911426793407782 0.913227933405541 0.925156357176173 0.958287338740116 -0.249488814436232 0.445863714394419 0.964938938373912 0.659246468426252 -0.914904461705157 -0.704065098755011 0.704873662724722 -0.86964696936337 -0.964856806718197 -0.87878709774606 -0.894905263308674 -0.905108511622448 -0.954060167385272 -0.956072177217472 -0.94216996631521 -0.951858631513821 -0.955843537150499 -0.951843763004952 -0.965202650148863 -0.959123952279665 -0.930287756811178 -0.958099176438208 -0.964873396793964 -0.955510005631249 -0.767743854215588 -0.829194158026791 -0.926516425970631 -0.914258384651655 -0.949859069563624 -0.93958795915478 -0.857543047941673 -0.863511442460437 -0.880631605940281 -0.504601573124234 -0.403150875050698 -0.421688295319681 -0.204359104404802 0.409001286899732 0.68529700139048 -0.27725451344243 -0.642157456804021
-0.987741266061554 -0.93398556986721 -0.508268741776913 0 -0.247799515203403 0.0392971684859599 -0.885196654947781 -0.884379134748509 -0.286364554512133 -0.9323207364732 -0.784838201013206 -0.970145659422868 -0.975116086942244 -0.913971292752604 -0.723147700080005 -0.934200454161144 -0.788392557181862 -0.913226081680892 -0.896979304172891 -0.123007276590278 -0.954937223781086 -0.846810004067245 -0.504721826050308 -0.87812838829799 -0.861673379829177 -0.65405351345809 -0.0971747576792811 -0.937370582186644 -0.850989476217197 -0.54542070277836 -0.89523998299188 -0.967011516603408 -0.434219415389574 0.336055558108124 0.174958377384025 0.241545765288392 -0.572139578514182 -0.977449118593821 -0.976428716115343 -0.9720453711253 -0.981467161277127 -0.975350072556284 -0.954757956486241 -0.964363178590413 -0.976909034603186 -0.970221555615927 -0.929626016589903 -0.948377100927549 -0.969854865279549 -0.95736079644561 -0.942648809562209 -0.942614649269267 -0.944075415865924 -0.958345440949642 -0.889963635490972 -0.929113223270905 -0.963250907571502 -0.944228555677854 -0.853782938897084 -0.850184702921148 -0.962883852059755 -0.919113844127308 -0.54488240756112 -0.737845194057677 -0.820434717782033 -0.340453055898712 0.0748982845853359 -0.208572301594704 0.57322212085959 0.983327857969705 -0.445361400329317 0.982729063676485 0.992903346608876 0.995726629626189 0.995014082320114 0.996087907947008 0.996900349749447 0.996675926343878 0.997074294683861 0.99699366930805 0.996763654023356 0.996685231955012 0.996705373952467 0.993619998778225 0.988119584572993 0.987287883838773 0.903448869084697 0.850302811967555 0.973808694716747 0.237301374993422 -0.21693981872301 0.292932682996442 -0.751718405596081 -0.911833946010181 -0.937109316556469 -0.94485097017965 -0.971272113083756 -0.97680207811569 -0.978880912541936 -0.981326913344475 -0.980405413213353 -0.982055143956775 -0.984842542245075 -0.985679106011213 -0.984706606036217 -0.98529091704993 -0.987098923965135 -0.991839003591934 -0.990069818988623 -0.990183674359658 -0.990891026678577 -0.992112844362738 -0.990415379288864 -0.990491554532327 -0.991854916291103 -0.991584698655251 -0.989541847216971 -0.991742407604668 -0.992305927070316 -0.991255013839761 -0.990601787884387 -0.986710466221222 -0.988939760056661 -0.991828680666751 -0.972299280599404 -0.983844601370018 -0.982229447799696 -0.986071981364781 0.96827636147836 0.897442469406641 -0.99031710694562 -0.974892626992973 -0.980384373718067 -0.978794308002111 -0.98118726079679 -0.982521512816429 -0.981341815086772 -0.978463592998165 -0.972694370264805 -0.976446534543132 -0.979186275884411 -0.984159832065064 -0.98232608319681 -0.98309220687256 -0.981030463552572 -0.985421410140288 -0.983489422983835 -0.97982473567121 -0.974848548586428 -0.983366590957403 -0.984140542072799 -0.963460825011669 -0.969182426590678 -0.978598184034482 -0.975482814153267 -0.94083161647 -0.946203259778797 -0.948197730104088 -0.9434696811573 -0.909533915250676 -0.880872541722534 -0.713636301580548 -0.519579462012315 -0.879777582797672 -0.96607453937112 -0.985820167374931 -0.968434137171136 -0.990207806523122 -0.983478257965178 -0.992058092499715 -0.96987672769019 0.715033223122976 -0.985194070536562 -0.990744858733895 -0.976459932385742 -0.974059084734644 -0.985615403895145 -0.986611929771773 -0.987838117497882 -0.990967527366698 -0.990096419857295 -0.990867423204505 -0.992648371164417 -0.992880528624638 -0.992365838535962 -0.992106018045502 -0.989417603163591 -0.991400820419212 -0.9921526550155 -0.990185178422896 -0.990376934769003 -0.991335513842214 -0.991639792348522 -0.989322287210423 -0.98958727840802 -0.990646337020963 -0.989479431334095 -0.99044486623404 -0.991018362331481 -0.991365923283736 -0.989847107666359 -0.989210770479865 -0.991856330114619 -0.987478769513266 -0.987367652256741 -0.979700349714651 -0.905043481809306 0.132743714484721 0.298338581912697 -0.0347561945781069 -0.972686819175045 -0.940488132842746 -0.923974303328424 -0.979467639245228 -0.965500727182791 -0.699006961061588 -0.887902539931908 -0.960574282696935 -0.50160872427606 -0.712373155097508 -0.975278518324077 -0.963040858028772 0.532208126947034 -0.64034980744575 -0.980758810019798 0.0646110179534878 0.941934973854996 -0.936257208827617 -0.982556791242147 -0.952419255393613 0.944541951848618 -0.972709120658002 -0.986249799164903 0.827773495057577 0.978154712949143 0.0304233649484478 -0.840322694061554 0.950979117325204 -0.979682338914728 -0.902819836845347 0.986886355897516 0.977521744306597 0.982691513380448 0.980518577271499 0.956184128439462 0.97893758852965 0.911769849865696 0.957027148347247 0.98510369901036 0.942083300575272 -0.505614236604871 0.880959060218226 0.951796500092119 -0.287842587413427 -0.915872152820919 -0.341523848613142 -0.505890040574124 -0.443352607638991 -0.858194248389974 -0.911694318344165 -0.810241326002528 -0.86710841307678 -0.921830989400506 -0.922930239783286 -0.933991812907252 -0.915503398497197 -0.881304842075181 -0.939594937428292 -0.943633314193129 -0.922743270127771 -0.404690361475794 -0.646009877719144 -0.85960649753645 -0.855719940637684 -0.911607243561578 -0.875494902663651 -0.69686592551872 -0.713967742357005 -0.732984430992656 -0.0532759843737049 -0.012956158629075 0.0733872368231525 0.229543302711987 0.578591416562536 0.75291330525583 -0.0277115701442048 -0.559927668748048
-0.489570162115666 0.930687041660079 -0.665621172552135 -0.247799515203403 0 -0.641485876067652 -0.906982651408776 -0.847306278285994 -0.0514985738779724 -0.929945219625655 -0.543328505985953 -0.960295383343776 -0.979869639416654 -0.961591112869763 -0.691632037416976 -0.917353487188821 -0.882678212418728 -0.933660407526183 -0.818112954475332 -0.0144166059324506 -0.956864383706259 -0.823507844256614 -0.300516483415053 -0.871104735568899 -0.871285569276981 -0.536222304076476 0.125944692862221 -0.9294725265505 -0.819973176554278 -0.302772233030163 -0.864866972790769 -0.964114846860049 -0.360531038123071 0.4217420234598 0.348072131432046 0.433966702267669 -0.596264470837324 -0.976282692494313 -0.976272581990111 -0.973260978710621 -0.982475606695226 -0.977297122541884 -0.959186931155083 -0.967722581782584 -0.979160334958851 -0.974354838533434 -0.938279066366318 -0.954168721043924 -0.974465015787492 -0.962299892703821 -0.944014943312352 -0.951512948371684 -0.952896777598797 -0.952488252809601 -0.877773993856329 -0.93280223478823 -0.957175626109242 -0.930205621079598 -0.824252686647658 -0.770100995762902 -0.936314124430983 -0.837266227646459 0.0561012610088157 -0.0964827218656149 -0.287923467133583 0.452085645382547 0.681796594561437 0.629991996503501 0.749614686934656 0.979318512212189 0.436508432852404 0.974383376537777 0.990469593441842 0.995000020407012 0.994999822355255 0.996316886105736 0.99691872136409 0.996746621221544 0.99705681619651 0.99685393973642 0.996515130156557 0.996444801044313 0.996374086369605 0.99176702361105 0.989417355389538 0.989124369767516 0.951042432906282 0.940893781913278 0.976771854590368 0.678143486335255 0.554907769566749 0.760933599164673 0.0129574521969871 -0.785572585119929 -0.853265351868194 -0.878470626850963 -0.959486777949073 -0.97092592026427 -0.972057258376752 -0.978557126155813 -0.979974313547903 -0.981686634272449 -0.984651347022847 -0.986659216417066 -0.98586746881466 -0.986231586344888 -0.988460631467418 -0.9929838296642 -0.991477827339134 -0.991252652469029 -0.992441149138192 -0.993387638500715 -0.991824497870112 -0.991981157166135 -0.993396721827548 -0.99310397370695 -0.991260399528301 -0.993059372245652 -0.993597207707895 -0.992800288021924 -0.991923045660442 -0.987967304911138 -0.99056181995643 -0.992369994846856 -0.975315259435784 -0.986456156819989 -0.986675410052638 -0.988689374055037 0.968229336152762 0.907589188982488 -0.992045128919684 -0.978820071997781 -0.982545775442823 -0.980029512025601 -0.983855776468763 -0.984981347414846 -0.982930728650015 -0.980603848324711 -0.976090039410599 -0.978852855479658 -0.980698169276429 -0.985327012599565 -0.983725893204598 -0.984816134899007 -0.981353999498328 -0.986649945414607 -0.986115222559047 -0.980239103204485 -0.971164424001301 -0.982798718041749 -0.983923280318722 -0.958255088835429 -0.964320829920427 -0.9775431625865 -0.973150309641861 -0.925810100757476 -0.937573774663806 -0.945539521592513 -0.937129637766667 -0.867133395354137 -0.776886753781733 0.0754918423759956 0.358198676570736 -0.790365649895399 -0.962415389015376 -0.985089403198487 -0.970867714299572 -0.990170186962407 -0.981687252859677 -0.992386513477033 -0.968309883223688 0.803393820410651 -0.984706940351403 -0.9914020170605 -0.97867825591371 -0.975757526053219 -0.987376415331357 -0.988693506231082 -0.989807787868234 -0.992403464624903 -0.992111888235205 -0.992818645582275 -0.99401201703797 -0.994341541926804 -0.994011793546337 -0.99368583467763 -0.991815015842935 -0.992794823781431 -0.993289587703872 -0.991989437800967 -0.991959541624838 -0.992646663239038 -0.992827687564331 -0.991075593251237 -0.991262688948581 -0.991929531365985 -0.991240211763645 -0.991761411280786 -0.992263384694491 -0.992568877797404 -0.991084949651089 -0.990603975720784 -0.992691703061413 -0.989190598006395 -0.989034349728125 -0.984661150691606 -0.94850043537053 -0.599423193763711 -0.4806748642325 -0.656547912563606 -0.980401679525643 -0.965372528217429 -0.96412964013204 -0.985013241118516 -0.977537023026807 -0.915199760871507 -0.952304427360769 -0.974132273876528 -0.885063071589644 -0.936060108606579 -0.984606775281221 -0.979539295650635 -0.779096192401896 -0.942988090384281 -0.988159650347327 -0.721903380342607 0.860988253861341 -0.975171340314277 -0.990647720436695 -0.979118735374772 0.676090452033637 -0.989482526008429 -0.991252523222321 0.198698419148667 0.951451355801345 -0.857396150012928 -0.955381403983215 0.885937657807292 -0.987959591074189 -0.944211224899302 0.983711382347912 0.836346137898104 0.950686035968713 0.880983969796509 -0.000178881209103261 0.878920633251314 -0.364843318692623 0.245975810987998 0.951270596979219 0.492130785698747 -0.935604858184327 -0.837995092878556 0.598213422154359 -0.92058311451241 -0.976111863350773 -0.907997225414179 -0.921855425689697 -0.881404226656279 -0.935141899524671 -0.957170740340689 -0.943206155348403 -0.929632000531967 -0.948565157966038 -0.960362790117656 -0.963458193280212 -0.940072902165096 -0.924986159522872 -0.958491222559132 -0.961530156062006 -0.941599897848766 -0.649274207707863 -0.803556150366552 -0.901305243523363 -0.894526383239387 -0.926616109520285 -0.887833720596913 -0.744428468135301 -0.74411402347153 -0.712013047142297 0.0123804708355635 0.0401068044040695 0.147046790393059 0.329576949157733 0.619398283556367 0.781545742472931 0.196436514354724 -0.422193487949348
-0.744205422330373 0.920046949032365 -0.950048127339774 0.0392971684859599 -0.641485876067652 0 -0.773677992076295 -0.229298967381182 0.35005660920602 -0.881949474294974 -0.500709963009158 -0.95852714886891 -0.974970343327243 -0.975222806812758 -0.937647850171154 -0.943384811370563 -0.872889140320098 -0.963768559535828 -0.920371477097217 0.368627581207059 -0.964491570257528 -0.921063623728211 -0.616774751588984 -0.913323443322679 -0.942652410889456 -0.871720133352787 -0.561110556689052 -0.961734734125284 -0.936870370254117 -0.840024006829265 -0.940449615264427 -0.978948578325697 -0.851874556231656 -0.62202410763247 -0.743468501650563 -0.575146948227236 -0.884669763266718 -0.98397592642149 -0.983638860797031 -0.983578786407854 -0.986994440005128 -0.982888756490231 -0.975283403772173 -0.980053279650152 -0.984401207847357 -0.981454541583104 -0.967061995942816 -0.974000311714535 -0.981584877170972 -0.975453162826712 -0.971143436852877 -0.972886347197716 -0.971556938204312 -0.97533833817537 -0.959963480383423 -0.969474507772766 -0.978331865333209 -0.972044330754087 -0.948067007609502 -0.939956928115586 -0.975137915466824 -0.958952297303544 -0.855328426373608 -0.849359594759148 -0.805977893778336 -0.526921055080194 -0.0934252674315187 -0.0605393078213238 0.367511154249222 0.976745442362334 -0.81206982147843 0.969040871104688 0.989928467779484 0.995187643263403 0.994965446497101 0.99628935650747 0.996993086529348 0.996743554109734 0.997049476704526 0.996894665156294 0.996640115673689 0.996561966396221 0.996612959195809 0.993194170817966 0.989803285904607 0.987649716097282 0.881028385798517 0.919937686144627 0.976161251351033 0.137936345546611 -0.410707389308269 0.284608209750404 -0.583074963715091 -0.932592007843328 -0.95559800660596 -0.953044263343636 -0.978045563820106 -0.984045309757686 -0.984719288523204 -0.986740682814299 -0.986651768062657 -0.987736358358797 -0.98935765322674 -0.989928467007672 -0.988883333712331 -0.989602474567482 -0.990522544424567 -0.993701513148122 -0.992859205404585 -0.992650597287515 -0.993092773581921 -0.993895681384505 -0.992876302938537 -0.992640989992861 -0.993673070541265 -0.993567710932874 -0.99219213611133 -0.993411597586173 -0.99386035973222 -0.993342645357701 -0.992797302344118 -0.989383764398927 -0.991179182542961 -0.99255742821039 -0.980577445236275 -0.988348490168878 -0.988294009017114 -0.99074768726424 0.945956510863801 0.574285590887781 -0.993176606316998 -0.984477423972022 -0.98757578331038 -0.986517021008767 -0.988101885235372 -0.988704792816044 -0.987772946179506 -0.986502270151854 -0.982895976315803 -0.985369955945212 -0.987134982521381 -0.989976490491175 -0.98847511823291 -0.98982049613382 -0.988285637081923 -0.991298584562376 -0.991081477065565 -0.987591210096219 -0.983328104944833 -0.989012139860675 -0.989314334652468 -0.977983001320335 -0.981662036406341 -0.986355062434033 -0.984700420112397 -0.970721725403747 -0.97539186730094 -0.974329047587498 -0.970022301124514 -0.952053761991493 -0.914334056582996 -0.642017659932614 -0.059930860294055 -0.907580243087271 -0.973780850120124 -0.988230723957962 -0.976411860910677 -0.991296597151238 -0.981412308699256 -0.993285509226016 -0.979068265500684 0.626129052935616 -0.986160940083225 -0.992690593324763 -0.985745705160473 -0.983080902360161 -0.990023943026882 -0.991139271856128 -0.992276869138547 -0.993754352045102 -0.993295591168327 -0.993882614321702 -0.99474685760239 -0.994816051963781 -0.994501338723443 -0.994259522730593 -0.99260894966132 -0.993186428481087 -0.99367795597959 -0.992632680096707 -0.992345763766735 -0.992905504356506 -0.993177016428473 -0.991576579808814 -0.99152012496003 -0.992191437822676 -0.991671256026561 -0.9920551785653 -0.992390392591108 -0.992738218990532 -0.991540247619338 -0.990849437997659 -0.992833285297461 -0.989905688598122 -0.989778307719636 -0.985565281778518 -0.948945011937334 -0.577464769382472 -0.422532442569761 -0.721880553442957 -0.98295584965508 -0.972155585419069 -0.972420737278331 -0.986681270105564 -0.980337558333339 -0.935387443962017 -0.960442450266372 -0.97683335154525 -0.896606625943878 -0.943595034501999 -0.985170519563098 -0.97908757173962 -0.758617629825941 -0.94326051917766 -0.987400087439513 -0.494267794307461 0.82517864873895 -0.978323831501668 -0.990596460154147 -0.982535810493082 -0.248122310881451 -0.991510373436155 -0.992152199139457 -0.450796475373427 0.904523988525604 -0.919112309424036 -0.966130903588527 0.745749114293741 -0.99071607213608 -0.951091086113983 0.982076677372765 -0.368219421584925 0.890357855610913 0.777929465729258 -0.47316017465998 0.84876719452909 -0.778328247714005 -0.605144827160941 0.956647307901631 0.252856338693753 -0.96128894280562 -0.912468473987134 0.660296453898909 -0.936329755277335 -0.980007258083616 -0.909196310980498 -0.924073914913289 -0.923041461103732 -0.955239353685115 -0.95945059540883 -0.954271688070609 -0.953630670039813 -0.952827462218949 -0.95592169880823 -0.968520139198449 -0.954309793393145 -0.919172273603561 -0.956616385143637 -0.964591588353516 -0.94810240905531 -0.649504117263873 -0.780748275469706 -0.911300952858135 -0.895384326108334 -0.938030525845906 -0.916108046620762 -0.781704238703512 -0.78800625834022 -0.809300761399643 -0.169648587767431 -0.0661764595012726 -0.052251871712791 0.146035165960176 0.573343476022507 0.771825352271355 0.0423338074520132 -0.524344183854903
-0.979654796571608 -0.812023323219651 -0.970330621320889 -0.885196654947781 -0.906982651408776 -0.773677992076295 0 -0.654008273813922 -0.83666840651597 -0.9502566167747 -0.84284356807648 -0.978639615489183 -0.965450468293521 -0.916359288438604 -0.916340757885336 -0.957912663867442 -0.638561656168888 -0.932418169867335 -0.941660539963126 0.427761323396233 -0.955409483448172 -0.890886496498661 -0.647354907913142 -0.895206840683401 -0.900972983188134 -0.830372316501132 -0.475079463314777 -0.953168911935157 -0.907940927583239 -0.808161563322291 -0.934445530552475 -0.974171751978308 -0.741765379505795 -0.360857789411609 -0.550240696187865 -0.27840656272523 -0.753692189140131 -0.981083653029137 -0.979999061767525 -0.977653262265911 -0.9832096559336 -0.976474364460287 -0.96227143978898 -0.971314915887225 -0.978789351696136 -0.973243014471593 -0.947859483200656 -0.960251774041346 -0.973479004478922 -0.964425917976122 -0.959036065530996 -0.957744419815076 -0.955498419216436 -0.969871151613193 -0.941664560999565 -0.952682568619561 -0.973563718202592 -0.969249443916613 -0.933792393157104 -0.924221204026209 -0.979197386317761 -0.968936886921032 -0.876463390994693 -0.915176940982566 -0.925310984959861 -0.821175437439412 -0.543449446176443 -0.743562310845017 -0.42958711780215 0.970657367273463 -0.958811879051761 0.939913612301113 0.984594982638202 0.994196739900402 0.991794615504429 0.995086204690061 0.996792148908462 0.996535580999311 0.996950505800424 0.996658219385799 0.996519272439215 0.996471929513641 0.996520996539852 0.993101050811726 0.990729701804524 0.987998856825677 0.866748209192428 0.9123598204379 0.974980336192108 0.0741961538192662 -0.441696830516113 0.0845284980861879 -0.600532070136693 -0.919418739298739 -0.951708573717854 -0.952045473125173 -0.974499426569428 -0.980979366184283 -0.982773199349269 -0.984366349910505 -0.983140470143141 -0.984968313327401 -0.987054305993945 -0.987093894541285 -0.985875939327019 -0.986898214663415 -0.988124294068152 -0.99235896840787 -0.990934392865534 -0.990947210046961 -0.99137108383779 -0.992520266898728 -0.991013694336223 -0.990942475800194 -0.992136115763348 -0.991922265741172 -0.989973449227772 -0.991906939523889 -0.992446556156647 -0.991532138602113 -0.990797081701669 -0.985793219580541 -0.988452439173065 -0.991653459114409 -0.968958833448421 -0.983593612655778 -0.982868959646774 -0.987147561848621 0.970038603281373 0.894931499782598 -0.991354175161321 -0.977402304049679 -0.983073810008359 -0.981788127229717 -0.983357618769036 -0.98446654280615 -0.984030679845391 -0.981561099557746 -0.974806295077896 -0.97915166517789 -0.982966541389456 -0.986909757948294 -0.984238585746022 -0.985999069883624 -0.984749168338256 -0.9883880459966 -0.98759733348224 -0.983564771409652 -0.977917688786515 -0.986064996647276 -0.986604062985287 -0.970016880119693 -0.97494735098326 -0.982165525488666 -0.979886025002933 -0.958619804415562 -0.965270188783091 -0.960186368794109 -0.951439950696113 -0.919619888824123 -0.809873328308409 -0.046374682658903 0.461766077972926 -0.829098542536554 -0.966637890038196 -0.985749404641449 -0.96934493910977 -0.98937287353197 -0.970098423715754 -0.992016893175998 -0.947683582022402 0.909367470562286 -0.982048911882733 -0.990829509004414 -0.977114023339217 -0.97378439549938 -0.985498076029486 -0.986946786002927 -0.988839443057474 -0.991505179589483 -0.990449912100462 -0.991635128890373 -0.993218677015415 -0.993296098396666 -0.992827735214997 -0.992420012285404 -0.989371906288419 -0.991089156750175 -0.991890421534864 -0.989800479558305 -0.989932548321127 -0.990969622391964 -0.991252669563188 -0.98852517213037 -0.988753948236864 -0.989959406954537 -0.988535534557607 -0.98964832395933 -0.990247193231129 -0.990684601664259 -0.988665894689477 -0.987781782280461 -0.990947326976445 -0.984965742438533 -0.985153497958216 -0.974634987187642 -0.826909088086693 0.642925052363535 0.730244704490071 0.679738553289348 -0.958549443856945 -0.896533864149628 -0.830868045530787 -0.970807732160973 -0.945387567552364 -0.176448440085435 -0.748384194153785 -0.937554289325116 0.20679416967995 -0.343878865729057 -0.967712898362638 -0.946608641956696 0.777007975752213 -0.438800031712624 -0.979929016414905 0.245399596897341 0.95176159449572 -0.930340378650955 -0.983658342241031 -0.927662627778011 0.968839552512733 -0.965093687514641 -0.984169644328636 0.932878658827302 0.983434903723405 0.76840554345342 -0.625033658431137 0.970722891318647 -0.986038721135952 -0.891309998851043 0.990306709261689 0.954225028730445 0.9860515097218 0.983124836906286 0.922128667395467 0.978483059960643 0.957832803268836 0.976416035073219 0.989100880660896 0.973043529863201 0.0793704809824507 0.978242621837503 0.981532379757558 0.493531164246061 -0.894927434400184 0.624303665091013 0.403400297092547 -0.143517221855719 -0.833439549222008 -0.866488583930397 -0.704862337668711 -0.861877635244516 -0.902099621357314 -0.884822830223842 -0.920746023165287 -0.908400415484353 -0.828495076708731 -0.920060133606022 -0.933774203997223 -0.913398700675814 -0.141264727721826 -0.405592120263549 -0.825490210529311 -0.812731393358927 -0.905040228685991 -0.876940182621075 -0.650043708110772 -0.683873775132828 -0.762680454197071 -0.0868746766237317 -0.00809028824487717 0.018033731029947 0.135415245237116 0.55397630187534 0.747595137351365 -0.163183806627379 -0.640154507305158
-0.956351013443969 -0.21308967643046 -0.9625999887731 -0.884379134748509 -0.847306278285994 -0.229298967381182 -0.654008273813922 0 -0.497799516708145 0.414841407103008 0.934869431760263 -0.972874323066939 -0.967326692995096 -0.47611331477236 0.471573653213567 -0.882408102258765 -0.302243937417843 -0.739018482441169 -0.687230385773567 0.606321931415222 -0.925071792462628 -0.4461253462064 0.335129055129066 -0.699232420782745 -0.452557122409812 0.188114963670213 0.704829838616264 -0.852443902556046 -0.412826014685608 0.389069924803782 -0.703727773133967 -0.942133265377442 0.505382982184812 0.791354629818286 0.831198729950961 0.836077400607077 0.460241381889284 -0.967791798722499 -0.96714781498653 -0.942268486873441 -0.969531133625679 -0.955885448153683 -0.879599924373613 -0.928208381445289 -0.963398976700699 -0.947434399457504 -0.813515737304047 -0.888540382167076 -0.950607991216154 -0.920273292693732 -0.877982318121445 -0.887636747994663 -0.886973385697916 -0.917224368578336 -0.624380856863796 -0.809926018849578 -0.921984956005574 -0.898882144464982 -0.588340489525095 -0.107366190483024 -0.919278003723323 -0.792970843203187 0.733468262203975 0.640819919739907 -0.119079683825159 0.686851096942615 0.874469473641944 0.714253365755809 0.65634351687883 0.980514595887612 -0.78640226811971 0.918114254110232 0.978391033958452 0.992095631961372 0.989444086327166 0.994376206780342 0.996439675867023 0.996392560991728 0.996822895197098 0.996337070411164 0.996246526153182 0.996313417580728 0.996198452624243 0.992196859322989 0.99289408569236 0.992000908164406 0.971965711300548 0.96983078506129 0.982310146126935 0.863527598881879 0.849799608925638 0.894881662241612 0.781267101230338 -0.0165944224556119 -0.46399759879201 -0.636346836157416 -0.916538109943692 -0.946189276941736 -0.95433993255443 -0.965853340944028 -0.966067942616258 -0.971641772040699 -0.977372577184148 -0.979118902641506 -0.978095378696966 -0.978381335250485 -0.982776009412511 -0.990112255948443 -0.986918162943051 -0.987184039599503 -0.989065050262568 -0.990546749236771 -0.987417757119178 -0.988431324733806 -0.990853249397056 -0.98987744181066 -0.985969843879754 -0.990425184327366 -0.991280908469416 -0.989146760365483 -0.98722949875619 -0.979040079717349 -0.984744080176049 -0.989910497254704 -0.939373181680556 -0.976587672012393 -0.977521094334126 -0.980416983130861 0.982232676641173 0.969354737471549 -0.988641053778689 -0.957292801284378 -0.967369564710137 -0.963036280687262 -0.969961327942409 -0.972642492826788 -0.971061814567491 -0.964693759095066 -0.947763224573537 -0.955026584449192 -0.965068238228116 -0.97555042318309 -0.970036675323752 -0.97270012772569 -0.966560905109764 -0.976003522800927 -0.975003868406996 -0.95993184154964 -0.929241230500676 -0.964778046596851 -0.969723670541965 -0.887702609333769 -0.904980226077543 -0.951850114389675 -0.939206389848266 -0.744065065852647 -0.801847970502854 -0.814945803608015 -0.76318053346506 -0.170470749665349 0.525248463544654 0.912271215219645 0.913731964855256 0.226414153001818 -0.929651088929748 -0.976969175530859 -0.954072287909352 -0.98504703596253 -0.944683620681252 -0.989085129016056 -0.647429872570118 0.958169600479568 -0.972960199539761 -0.986982275705317 -0.943736024457526 -0.940790944973254 -0.974931306132921 -0.977917713635262 -0.980589492231208 -0.986962597529708 -0.986118934833382 -0.988439225614423 -0.991151486246351 -0.992030987639492 -0.991676911614129 -0.990534676943661 -0.986571093323223 -0.990050212792397 -0.990660531736168 -0.987502389808582 -0.988809846132145 -0.99030236227127 -0.990051168287791 -0.986645420356274 -0.987835207459086 -0.989015897533787 -0.986851346167658 -0.988536443692901 -0.989684612200258 -0.989931875878008 -0.987005507785805 -0.986757163118156 -0.990184240651578 -0.98195157224491 -0.982629611856429 -0.97128658196186 -0.805620406540198 0.656569669684197 0.727660784024943 0.816097432559345 -0.936598230121632 -0.798983975061882 -0.566815042435076 -0.959256678107337 -0.918762198044017 0.300693135036864 -0.531182141629868 -0.910485920075942 0.341944808242243 -0.290845861442904 -0.965869015120683 -0.951434313970219 0.616425904229046 -0.708447076918338 -0.983910033696764 -0.582809726475791 0.949377626944642 -0.931173183040691 -0.987113153625753 -0.892058513256936 0.977397563481382 -0.957594555178766 -0.98205992912867 0.952991785050166 0.985153664720662 0.863361422982312 -0.483013128529772 0.973440805559529 -0.982790432017427 -0.869164428889208 0.989803351703062 0.949722267740467 0.985865371991369 0.978280677063443 0.785415534772362 0.961768440507976 0.932653234903642 0.958278814246416 0.98220690125909 0.954737103007109 -0.00855472577670916 0.97046168190317 0.972485265607384 0.545528397777256 -0.849930170508989 0.705819972475086 0.475192858511134 0.390231011631754 -0.585554190339576 -0.843273744072793 -0.523638011749866 -0.6711331476487 -0.878797820686388 -0.904935824287151 -0.886221214163667 -0.833794152027835 -0.821424918380198 -0.918204783438286 -0.914251769259232 -0.874872861841032 0.0574018991759617 -0.383867313468722 -0.741250406667245 -0.761328912917994 -0.843453780742754 -0.74504135067984 -0.42332596458588 -0.452854657893074 -0.466844907108329 0.302613166150635 0.275325268052454 0.393695832571003 0.460160650181415 0.660745238030231 0.79236914548156 0.153566252262655 -0.50465336928895
-0.52138136978409 0.907934860752584 -0.852399740912521 -0.286364554512133 -0.0514985738779724 0.35005660920602 -0.83666840651597 -0.497799516708145 0 -0.676251126027684 -0.567135344183345 -0.988160432746023 -0.993590785826441 -0.988792780747155 -0.954464056572868 -0.968192561545976 -0.944400614678475 -0.977534499166394 -0.926216874176493 0.0450498416764357 -0.975332566828334 -0.931005446602734 -0.588349940182836 -0.921695223397361 -0.939242225177127 -0.816511679265958 -0.269317806530912 -0.955881911686449 -0.913505227347066 -0.693249390398158 -0.92121655560102 -0.977148743919388 -0.712495901697441 -0.130730153746862 -0.16393241937007 0.219263032544662 -0.737674811128113 -0.981862430931028 -0.980164814887768 -0.977303959255054 -0.984311910238695 -0.978960439860609 -0.964906682059474 -0.974169236433661 -0.982545125673759 -0.978835374070292 -0.956885887731242 -0.967389128775897 -0.979827326470832 -0.97271715961782 -0.964122074331715 -0.967885946252494 -0.9671580473883 -0.969048473118077 -0.934595421421287 -0.957101354859152 -0.970926416143278 -0.963190260240634 -0.919924557374534 -0.84300312463628 -0.95541142477517 -0.915701325189605 -0.12858366111208 -0.0112067947775359 -0.23139968417201 0.455936237680048 0.781216309160184 0.681307797110808 0.530976603793604 0.973268273810203 -0.73656764262768 0.915995152220408 0.979912482574432 0.992857429190946 0.992239464078388 0.995391359035863 0.996647719144885 0.996572711099354 0.996885032082487 0.996409299780046 0.996228937416839 0.996254585327133 0.996157360739435 0.991601364921689 0.992597289770548 0.991483727695464 0.965974739353197 0.970475551195235 0.981288250376756 0.791968894767109 0.748922086694514 0.853328694927878 0.721860417302966 -0.583616417875551 -0.798533641770186 -0.821402086683005 -0.955344437075741 -0.972532442150873 -0.974259832920482 -0.980488867606232 -0.980961716147094 -0.983553716487015 -0.986263203668959 -0.986635991940552 -0.985421867944446 -0.986935827761236 -0.989436283723321 -0.993118131366216 -0.991740267522421 -0.991632419522812 -0.992833698430987 -0.993536492269973 -0.991991008581457 -0.99227092970491 -0.993736506149326 -0.993341388060054 -0.991264151145695 -0.993261636328066 -0.993825423215699 -0.992953287688076 -0.991644017770993 -0.986557266612592 -0.990054158593582 -0.991916774357823 -0.969865592582462 -0.98574153461046 -0.987838147386044 -0.988427397601391 0.97017140567204 0.924460560219598 -0.992714636729605 -0.979450485486588 -0.982830841600552 -0.979882289574562 -0.984641629523132 -0.985631598078354 -0.983743051604482 -0.981483877861129 -0.976438719084712 -0.979080070801667 -0.982052950372633 -0.986722361750032 -0.984279319069022 -0.986660054882272 -0.982734028868669 -0.988260353684295 -0.988786845066061 -0.980959758176035 -0.965353325316661 -0.982403108293683 -0.983908491665862 -0.953577246507945 -0.959723043066922 -0.97670599120839 -0.971804479554932 -0.923360038905998 -0.942462644560684 -0.943533261721294 -0.924263770341207 -0.78861235630155 -0.201502554565163 0.868449296566956 0.897175769686969 -0.42795982088013 -0.957937915600457 -0.982992509701057 -0.97060429832328 -0.988242745764054 -0.955387731081794 -0.991662329852904 -0.908689822536574 0.941940771594823 -0.979167917425961 -0.990883917625667 -0.975125446245333 -0.971309557013362 -0.985850641171513 -0.987956979416796 -0.989614499449541 -0.992178951202988 -0.992100836939312 -0.99325777685422 -0.994316784333684 -0.99471126447579 -0.99449178814871 -0.993969575713524 -0.992054510873171 -0.992899088973797 -0.993313903970552 -0.991876463766783 -0.991899426781675 -0.992563510599047 -0.992639778559119 -0.990668593112768 -0.990880100893075 -0.991513299494832 -0.990725772865322 -0.991317122856749 -0.991847427172126 -0.992142760501698 -0.990378311504147 -0.989994184240761 -0.992079726107985 -0.987448632049818 -0.987655284434255 -0.983083556722134 -0.933707769463293 -0.30843528401102 -0.081960782734686 0.0199820387396029 -0.97295558757688 -0.950955529854256 -0.944661631161828 -0.980726226476513 -0.970212490470642 -0.875613760584506 -0.934587402576815 -0.965907946557362 -0.849849304299041 -0.940943898614176 -0.98442165550769 -0.979838296182775 -0.874386760141119 -0.966307416859443 -0.990536676488158 -0.901590884999919 0.743855334190699 -0.982165009966801 -0.993516357662114 -0.979991480386858 0.819705496188731 -0.991570135979364 -0.991302746510064 0.638160581507042 0.954136111288641 -0.71444086592602 -0.949517808988939 0.902757317966474 -0.990585320238526 -0.942176470789613 0.986239434742719 -0.60763314616389 0.958246590398438 0.901088539105169 -0.787126612941918 0.673021664800924 -0.48210864185597 -0.194064430001346 0.917839871049708 -0.183313665328123 -0.957451152453281 -0.854090634359709 0.242439576212524 -0.96195143843511 -0.985543545465211 -0.948802569284023 -0.946828139633066 -0.929337653368779 -0.956019338451405 -0.96925938078561 -0.963232990070905 -0.954302185975213 -0.961515131481154 -0.968707690121686 -0.972069877792698 -0.954304470753499 -0.936114415401047 -0.963558920156542 -0.968333647860095 -0.952183607683469 -0.685017039109019 -0.808392904167774 -0.90495367520597 -0.897004719130766 -0.931755381308206 -0.901190234680457 -0.758779019032589 -0.75901318493743 -0.748170905613192 -0.0487029709729526 0.00498653224251517 0.0841063231624202 0.26085562604813 0.599161976613847 0.778310753045029 0.13260078983421 -0.483217564214845
-0.951191012532794 0.444130755347403 -0.96472315126906 -0.9323207364732 -0.929945219625655 -0.881949474294974 -0.9502566167747 0.414841407103008 -0.676251126027684 0 -0.716031885624126 -0.601680954114375 -0.896885160647238 -0.986959961919799 -0.985703154445563 -0.943726247966042 -0.699319903152197 -0.973747293423373 -0.942857166704801 0.86766550971179 -0.965268843701644 -0.933585425623148 -0.506144000619894 -0.889199302822185 -0.940417305306431 -0.90012977275923 -0.44031966331567 -0.958894432918254 -0.940535967448468 -0.869279715494114 -0.939333289284468 -0.979282295518308 -0.856005703267561 -0.666444484411557 -0.712190068819433 -0.371069265442212 -0.836055644479562 -0.984361249177933 -0.98325985937344 -0.98134293057966 -0.985534542404899 -0.979791005405674 -0.96962858059529 -0.977993411054001 -0.983285378855837 -0.97939094325748 -0.96415774743963 -0.973311639745172 -0.980887959307288 -0.974478881199084 -0.972456051119541 -0.974586982092355 -0.972112100444989 -0.97740014465803 -0.967150779124956 -0.972640395235712 -0.980421137697877 -0.979108299506911 -0.967676632160716 -0.954872206115538 -0.980253292159409 -0.976727177602417 -0.942328443962512 -0.935522599337493 -0.89775287777443 -0.854266900958032 -0.524159656851872 -0.600878632633223 -0.67140181081069 0.945317313033645 -0.963730898157769 0.743776300247536 0.966830830331525 0.992172337730681 0.989468205880341 0.994827161608107 0.9966769016728 0.996483687481883 0.996831913860647 0.996279763971935 0.99616984952066 0.996209787261961 0.996173909962376 0.991793182089959 0.992505775967515 0.990320321654881 0.920188779558069 0.960497993149594 0.978278266769166 0.210465023869765 -0.214707593073199 0.433381184184457 0.165804501941374 -0.903505523892014 -0.948869576000604 -0.940173337597565 -0.975178105296662 -0.983837688307159 -0.984594228689858 -0.986613576601277 -0.985783274491167 -0.987443760329971 -0.989107107936213 -0.988636322900456 -0.98719022868132 -0.98879676371327 -0.990193992903754 -0.993409091245319 -0.992378222187756 -0.992178645497518 -0.992881495613918 -0.993672053990577 -0.992349662071469 -0.992249641094424 -0.993519095566759 -0.993295197642051 -0.991377321279242 -0.993001106732354 -0.993591637075751 -0.992864626860738 -0.991745763814314 -0.986501876344988 -0.989776785770569 -0.992002839238009 -0.970585580106692 -0.985886376129266 -0.987507277111721 -0.989178118112374 0.966826551149061 0.87536016310929 -0.993014878186682 -0.981726117194102 -0.985594303472413 -0.984284133210855 -0.986963110242755 -0.987507472416134 -0.986750427975371 -0.985270794864778 -0.980712692212287 -0.983456415524851 -0.986356192847897 -0.989646385194312 -0.987110618880835 -0.989744045918938 -0.987789680490606 -0.991496724102901 -0.991856316063021 -0.986771720351084 -0.978589559597109 -0.988178268402922 -0.988802111437801 -0.973811560398463 -0.977828020737911 -0.985319453176375 -0.983399014486429 -0.968274606433485 -0.975736633584465 -0.972347042467447 -0.963554618864191 -0.934886836880596 -0.722574113983555 0.680464014220248 0.84917231300763 -0.784713040211092 -0.971207723452122 -0.986152147903372 -0.977437617947492 -0.989125160480958 -0.938017049537502 -0.992280831066878 -0.924111554346994 0.940751650992817 -0.979870711721816 -0.991758828905611 -0.981145299291472 -0.977638521688861 -0.987549209989984 -0.989348186687621 -0.991138872656786 -0.992944894086535 -0.992559044341966 -0.993709550827617 -0.994613942479906 -0.994774174295184 -0.994511602294489 -0.994020266938398 -0.991800996483085 -0.992544327194388 -0.993109426563163 -0.99147471722067 -0.991300977897257 -0.992069350514919 -0.992240929923378 -0.989809779066923 -0.989872689127769 -0.990770866594375 -0.989708564849469 -0.990399253858265 -0.990884214642231 -0.99128270552342 -0.989201037293148 -0.988359743983915 -0.991073368272194 -0.98506419771079 -0.985397288860374 -0.977419657178795 -0.856643042534336 0.570916567960126 0.704910774648381 0.75358028884557 -0.956658871191448 -0.907286000185289 -0.867937069363029 -0.97138509600946 -0.947786726737702 -0.520106032675972 -0.833916432774684 -0.94126987156184 -0.25417005212272 -0.81651431331139 -0.977093912676445 -0.964813322522065 -0.142837112369543 -0.924298180828437 -0.988159224613628 -0.746655434273662 0.875560428512864 -0.976928805680844 -0.99251575165139 -0.971371276389325 0.932793944197924 -0.989705553086908 -0.990090879244951 0.852112910210085 0.968354094263314 -0.171976806090803 -0.92710341502955 0.915443588552061 -0.991857524629196 -0.948793344898749 0.987005163914651 -0.87544628822509 0.96451374772765 0.946352111155482 -0.654736865336517 0.835921203435473 0.136537758988278 0.531595004627686 0.961178866731902 0.694757297035071 -0.95464109559477 0.894611016661471 0.939363184399316 -0.92401920752143 -0.98421736084135 -0.533885786484258 -0.727093091896734 -0.888598744768991 -0.942669145005161 -0.935665280388843 -0.930443420933822 -0.939790538254811 -0.930853511287185 -0.931820186189154 -0.957869938505624 -0.935335748768484 -0.852662803093015 -0.936476181706096 -0.952565196194557 -0.926197689129293 -0.127786889743784 -0.41848005288171 -0.841171507927054 -0.810946905966188 -0.907681487943766 -0.874509041224966 -0.582498260102952 -0.616438733258613 -0.729448659647322 0.0911988043568718 0.209289261636311 0.198914531606533 0.279874066083365 0.638000371791199 0.802851842919726 0.0544751484241067 -0.564849591608201
-0.947287268324654 0.50641399487774 -0.958908963623708 -0.784838201013206 -0.543328505985953 -0.500709963009158 -0.84284356807648 0.934869431760263 -0.567135344183345 -0.716031885624126 0 -0.32013052141037 -0.0146729969635887 -0.111040219823262 -0.891154290340108 -0.922955234568314 0.19980046384994 -0.924895809317818 -0.93521699949005 0.71456320004459 -0.955519790440313 -0.867793225760184 -0.382607076333686 -0.854529033573709 -0.830995868494943 -0.705916119886945 0.105545234644916 -0.93849261439741 -0.841625795028909 -0.620193746896728 -0.907152605871939 -0.969488829747511 -0.398390663053152 0.244943170013553 0.336232038778441 0.567488828795115 -0.137834240047223 -0.977213643229326 -0.974355795252301 -0.965123715853244 -0.978262791138264 -0.966435637392644 -0.932188833837208 -0.959002948979944 -0.974025330388668 -0.964917182940317 -0.920325642367248 -0.94641993739226 -0.968612896078799 -0.956800592021491 -0.949794683041383 -0.949200369996357 -0.942695629785245 -0.964086265233987 -0.916565323903958 -0.934785737349923 -0.967248995209274 -0.96935927047017 -0.929747382581081 -0.827684525915972 -0.974657306929851 -0.964348045115012 -0.617378841604214 -0.727398426480012 -0.870607355560611 -0.573139715955329 0.617130276956514 -0.427267120352348 -0.706607545568192 0.947707416122125 -0.969932153382297 -0.248712017187567 0.876693617447637 0.985786683320517 0.973186986583658 0.9914673095813 0.996212667117936 0.996221706457458 0.996666863102366 0.995797456677645 0.99592102939706 0.99614966882854 0.996002085980249 0.991827055665788 0.994050754516527 0.992572620692312 0.966661648006034 0.974629032530529 0.982115673178673 0.784169054402997 0.736943714339801 0.824766204876138 0.809454296799286 -0.401540487487834 -0.807614843983921 -0.831815264778293 -0.948248803882951 -0.969018086158478 -0.974013756386234 -0.978079569678255 -0.975371925551306 -0.980314827570551 -0.983403255002107 -0.981529441895267 -0.980083000631865 -0.982911529796387 -0.986072124546534 -0.990785423030929 -0.988417869205296 -0.988839187244206 -0.989768156549966 -0.990974682587067 -0.988495408861293 -0.989158016592241 -0.991024791743315 -0.990218932145437 -0.986626099734784 -0.990482423326673 -0.991223494278429 -0.989194869069312 -0.987108691275343 -0.976963976293245 -0.98322908077205 -0.9897795688852 -0.928095146623507 -0.975452709080863 -0.978158241854928 -0.981217648677169 0.982036995670977 0.966502039392159 -0.990148618992804 -0.96561047023837 -0.974742564402925 -0.971214629231848 -0.975515891459989 -0.977534974689683 -0.977601208102776 -0.972594089538177 -0.957937351225749 -0.964706343740609 -0.97492696056776 -0.981987477362073 -0.976788904377364 -0.980491106859077 -0.976774315118422 -0.983365188129919 -0.983794406479862 -0.972635620759408 -0.945154832880426 -0.974178081490668 -0.977623863116383 -0.926731942388018 -0.935494806071854 -0.965419429416818 -0.958461330353305 -0.881062280327407 -0.913315347201414 -0.888891060192173 -0.832654339215196 -0.378034793740462 0.701061573120412 0.956062517577596 0.959067520275923 0.396743491422168 -0.944717451749374 -0.977270547958527 -0.963757776229486 -0.983298531682776 -0.761540677528037 -0.988490929455581 0.425061274076028 0.972302067406705 -0.966907651529814 -0.986670858946666 -0.942076066994678 -0.940851919997014 -0.973118389595961 -0.976943951507598 -0.981339528185892 -0.986851547510822 -0.98510658569814 -0.988814373836857 -0.991545303077431 -0.991928367704148 -0.991510658176023 -0.990283464454919 -0.985682583961697 -0.989314641082171 -0.989991085051188 -0.986124113046031 -0.98771663934805 -0.989331962486404 -0.988951315618589 -0.984444592210296 -0.985810999264802 -0.987318665839529 -0.984106347131821 -0.986510681919166 -0.987878335905171 -0.988078248542325 -0.983912795289702 -0.983437121372006 -0.98790052138027 -0.974208231258428 -0.976140128987945 -0.954330174147144 -0.312182727866224 0.88812528957678 0.912799895756552 0.952933665577859 -0.703345089976231 0.242221765935467 0.776349776608726 -0.872594418271123 -0.579067392038706 0.891507775945719 0.670371021677147 -0.642675151467123 0.878843398647254 0.699914160531003 -0.937822209534588 -0.896822523726998 0.869774221270451 -0.440829199611139 -0.983264773414577 -0.762219339760738 0.946901270217861 -0.920203764579504 -0.987804208860044 -0.607108788391695 0.986601800013633 -0.817448766750146 -0.969165982735127 0.974808491257539 0.98880580218054 0.954496266486926 0.382085567054307 0.976542426544076 -0.985230925469302 -0.883372615569108 0.989691883824546 0.852765014801564 0.987852258998724 0.982568482515075 0.71289109739486 0.956221414710862 0.94913868461894 0.959674431470129 0.979414514863974 0.956855282211343 0.643679138200392 0.983531134621598 0.974013579556792 0.841106764150503 -0.550008734530436 0.958814625363042 0.900138367542489 0.635155409297937 -0.393419894813175 -0.63980648202349 -0.0835523520551403 -0.707812973512322 -0.856786158635021 -0.845189918773537 -0.858933341144445 -0.846842926876746 -0.752642739901838 -0.893747382752061 -0.909388405176439 -0.885642937319904 0.321313649085116 0.00769491957838842 -0.67901364205748 -0.699628523268694 -0.854278749955082 -0.796919856997802 -0.4031052845453 -0.473294382982042 -0.615890582279295 0.150158448378184 0.18726194826719 0.251449803622933 0.294118106407158 0.608161674823416 0.764846977765518 -0.112166450053737 -0.642157648715263
-0.962923055171018 -0.819637053920701 -0.982385037469728 -0.970145659422868 -0.960295383343776 -0.95852714886891 -0.978639615489183 -0.972874323066939 -0.988160432746023 -0.601680954114375 -0.32013052141037 0 -0.396524140776855 0.910840823244792 0.981198767279656 0.792562894003482 0.938679548757438 0.835639711571372 0.915055272637421 0.965615430477232 -0.620013754211105 0.878387605523756 0.92974898519514 0.758758504937341 0.858778873922689 0.897969777071797 0.953443500109865 0.378533869816032 0.813159605514133 0.916648013095482 0.63666201166058 -0.832661994442976 0.904461759272061 0.932220001111947 0.960964257075865 0.957350575809686 0.909551918244198 -0.951046863776779 -0.951851551690798 -0.721177866065312 -0.927740083870014 -0.873205648566118 0.0867756448977072 -0.72027407228635 -0.935758881380549 -0.862395156112553 0.00379828535469222 -0.652362285610444 -0.90492201933234 -0.785070388500591 -0.661543689938407 -0.778686655946067 -0.737289469518005 -0.796075483527428 0.123621783190844 -0.430891700855712 -0.757007812125633 -0.839701041882781 -0.33021464785918 0.728703166065841 -0.720513058150232 -0.588280855300451 0.890673828136105 0.900065319126574 0.611052241819289 0.802312453381036 0.909813556834445 0.736797378135412 0.0265627179827833 0.944909731841616 -0.928559031052734 -0.581930795818212 0.78836477424536 0.978776977451999 0.967205434548204 0.990095979652114 0.995785285070536 0.996137784367519 0.996574364682073 0.995407999836215 0.995616320093744 0.995919819082628 0.995591659465045 0.98970611622533 0.993936668108445 0.993060981509311 0.979361640138524 0.982168306361148 0.984323531821872 0.912633275079735 0.927853936281175 0.943033671297428 0.944446323636442 0.829176097188122 0.741907828479796 0.694737711694648 -0.571815994683891 -0.820499328522471 -0.836252143681264 -0.912137990751758 -0.927533810566298 -0.948373935956621 -0.960481117775315 -0.964529010177514 -0.963593232410561 -0.962272878777221 -0.974530345001182 -0.986537532660608 -0.980358433613971 -0.981343431567785 -0.985487355051242 -0.987351687286127 -0.980481645724927 -0.983573720103126 -0.988960126101625 -0.986323595695863 -0.975414275572667 -0.987800745410194 -0.989597318697365 -0.984163378045844 -0.97809512797248 -0.954330521570014 -0.971434791180326 -0.984188390434867 -0.797073715238217 -0.962007812530475 -0.970531138511055 -0.965400233985149 0.986773163824122 0.982751634035355 -0.986209230095241 -0.899788386346496 -0.922745683020823 -0.913016112599975 -0.942534985146201 -0.947722978781693 -0.946264928791716 -0.932934534696069 -0.879893545158587 -0.889559103381712 -0.929036474594306 -0.957775710533558 -0.945600922754449 -0.956858093511018 -0.938235823993822 -0.960233919567208 -0.967343442457306 -0.916010158171259 -0.716614576954145 -0.915477954501579 -0.942478331115729 -0.649623685144093 -0.699584675342552 -0.895521539838004 -0.863846859153498 -0.286558337141874 -0.51420443238269 -0.497671694727158 -0.374246238164028 0.667979862625218 0.888970368714409 0.971976893313371 0.972257819798724 0.836414447995119 -0.889106712615822 -0.967422200986848 -0.953621307868392 -0.979109052923168 -0.355709583087268 -0.985582299107999 0.817879410756952 0.978878847104374 -0.947350942675368 -0.98256411520567 -0.859104718439862 -0.86124417208555 -0.955440258957403 -0.964038286829593 -0.969210249561619 -0.980387058530101 -0.980348092840164 -0.986121941330456 -0.98972287074709 -0.991322961334009 -0.991291353856994 -0.988880343647222 -0.983467639042039 -0.989010405208487 -0.989395170933808 -0.984537587192352 -0.987309260553116 -0.989210005295273 -0.988249390952452 -0.98292737234492 -0.985356980330762 -0.986726241370196 -0.982828156251183 -0.985649254799353 -0.987665155946235 -0.987665403081881 -0.982255911942775 -0.982492048846542 -0.987089226717532 -0.970766975369751 -0.97384556393932 -0.95436420392357 -0.418589639808176 0.862072192273726 0.88990952830232 0.953585860969159 -0.645609652276446 0.30434095393199 0.7831382841289 -0.85373018191215 -0.540479517905235 0.876161009451001 0.656536565119768 -0.569465053079383 0.830901701597102 0.375233443338537 -0.949210571624135 -0.931157407358644 0.590310038181533 -0.849743651601794 -0.987464032449307 -0.884182023079181 0.94463831986642 -0.947177016080749 -0.991867657234331 -0.662606704021419 0.985096291819181 -0.948372680179245 -0.97653463483461 0.972630526521443 0.986556405650254 0.932070465081139 -0.317267342667417 0.970507781807067 -0.986378832974899 -0.894245309641676 0.988678506192577 0.0688962478391235 0.980765603538802 0.962914473234963 -0.640806176467746 0.831824115292033 0.804755012896051 0.826300963595158 0.946282353576242 0.841979023799483 -0.536880861399688 0.946961818798713 0.922377064057752 0.692536469773777 -0.828346875014528 0.939380899929957 0.872234988652493 0.716156831546255 0.276541110253428 -0.481296809518528 0.133985212447549 -0.0250154088725658 -0.719995848976479 -0.853645393466484 -0.749915494769325 -0.441287554854958 -0.50330076403653 -0.851366984956905 -0.826502968528199 -0.620422627394943 0.726573678465876 0.406268233590926 -0.112939291133521 -0.223344244777138 -0.407266272041109 0.0635373125445781 0.417944034004341 0.39085863184834 0.347298023266362 0.706242748344261 0.664308083397965 0.731826673077478 0.720563814146032 0.782156287884843 0.859156144235879 0.481766914522634 -0.338155097177648
-0.970468019034043 -0.8799108957251 -0.978735437866412 -0.975116086942244 -0.979869639416654 -0.974970343327243 -0.965450468293521 -0.967326692995096 -0.993590785826441 -0.896885160647238 -0.0146729969635887 -0.396524140776855 0 -0.145063875007451 -0.451220918446108 -0.742920351895736 0.874406831118722 0.217796327853472 0.852421651051768 0.972020103267139 -0.695305483692756 0.693761161316286 0.881891844520914 0.386216734758377 0.200917400578412 0.637430839080104 0.885222291983861 -0.613809476812502 0.0672433478841627 0.724234118693156 -0.369416840444512 -0.933434769071526 0.594278439897933 0.768549538620577 0.831346737717205 0.891073823311399 0.594155513785767 -0.972699341131005 -0.971244129610076 -0.925445786220649 -0.958925818213065 -0.935122381796978 -0.762332705509838 -0.902116139416522 -0.959168664296838 -0.92976187011674 -0.738745578198784 -0.874166412516717 -0.94173518326135 -0.896005931772689 -0.87166279423234 -0.909818462905254 -0.894067813866012 -0.913522907103266 -0.72684982719677 -0.82847872082636 -0.906112073127562 -0.927345447910312 -0.779746236841993 0.208238079213241 -0.893825613990648 -0.852410163063458 0.796522837781037 0.777157221227811 0.282836923000302 0.666973337852985 0.870059569914655 0.490244823502725 -0.319526215933933 0.928332968854064 -0.950898500630485 -0.421871741015276 0.857409071181138 0.9847684291058 0.979132211738368 0.992653233954622 0.996257618212204 0.996343532330289 0.996681340274996 0.995738771591708 0.995840478866251 0.996066323568799 0.995897198233384 0.99113925147799 0.994141097332123 0.992938845348886 0.976232771475723 0.98291940762244 0.985018000051092 0.915334564469528 0.924365368296567 0.939631302304107 0.954977891222031 0.841818856024059 0.700831184976936 0.764284773805023 -0.467086048071296 -0.87247924973028 -0.871697872554356 -0.923317226515651 -0.938181462803285 -0.960302011695068 -0.969254055321838 -0.970419263812367 -0.968405870307455 -0.970218247669405 -0.978732307462617 -0.988434735979682 -0.984919861147047 -0.985304816000042 -0.988063801586209 -0.989500854939468 -0.984914686875353 -0.985829060950928 -0.990305515665457 -0.988837334981999 -0.980659472874558 -0.989145173473849 -0.99093903269827 -0.987550192907244 -0.983058297676107 -0.96543737810067 -0.976927933368404 -0.984876095645419 -0.8873803511665 -0.972402498771321 -0.979168804119702 -0.976080531217251 0.983160816055681 0.974968152350792 -0.989272723398404 -0.935092891209753 -0.949503157216962 -0.945683393914929 -0.964611325622526 -0.965989962572874 -0.964311970432337 -0.957826936618994 -0.931430043078019 -0.939459261489283 -0.958003287648828 -0.972990904610453 -0.961568996842305 -0.973726615004691 -0.961948336034586 -0.976791095687031 -0.981627904484499 -0.947537268365351 -0.840510268709907 -0.954746342832381 -0.964176274340954 -0.819331246684048 -0.849441294248785 -0.938543158504432 -0.915247927371778 -0.653822741196582 -0.802478456205793 -0.74917990179608 -0.612541388196459 0.545542858259549 0.871514868992536 0.975056672129733 0.979695084779077 0.908320499506205 -0.816443355292245 -0.962210462283285 -0.948746297849492 -0.977653498514926 0.733027254396727 -0.986751006548505 0.79079405929665 0.982155943747723 -0.930248160396067 -0.985730563444891 -0.919916260264599 -0.902415458198636 -0.965741975361058 -0.974714030492921 -0.980174442347931 -0.9859480520071 -0.986145278617656 -0.990405342834672 -0.9924252258162 -0.993324683068945 -0.993273354284843 -0.991645183550447 -0.987493823896842 -0.990431449910728 -0.990892992898322 -0.987546154748351 -0.988761493025266 -0.990183591656955 -0.989643240268338 -0.985281193513284 -0.986691469279403 -0.987898196775321 -0.985358355983404 -0.987116193236159 -0.988575135604978 -0.988806634903661 -0.984667704719118 -0.984269031912676 -0.988143467009391 -0.976085260599378 -0.978463750388454 -0.965739272277338 -0.655098366372904 0.802475141451885 0.854444362062074 0.932356877621019 -0.857560333191478 -0.552318233643364 0.101991223075532 -0.925118128309038 -0.823780691145709 0.608664137675346 -0.0211196047706629 -0.793188566798032 0.58709848389573 -0.52537098555046 -0.964428105977717 -0.95048461943238 -0.0880698516659779 -0.929523387880265 -0.989007924838373 -0.85925674021667 0.933951929150039 -0.970708514680436 -0.993864019634803 -0.85850290794448 0.979182519896877 -0.982612125124236 -0.982096052611813 0.968602506794415 0.982048286118693 0.885804587590989 -0.660780458479018 0.962687531224243 -0.989576814838528 -0.867170389189562 0.989016272650081 -0.917607909663813 0.968167176975684 0.932405242648037 -0.90381492412346 0.360172697214379 0.29193457122222 0.0653550896804899 0.847206377922305 0.387309494705363 -0.884243560723655 0.796404702979603 0.807730674765516 0.0949817228752817 -0.959289733164322 0.850307823777901 0.740805427857035 -0.00979353138514153 -0.66188289335551 -0.792210754486221 -0.697770942162262 -0.728816654534963 -0.800414183965431 -0.878284811786633 -0.89046759237481 -0.717253780577162 -0.560064451090173 -0.872313536060703 -0.880998653087871 -0.737641018581013 0.615281680481363 0.269361038099322 -0.450997366659081 -0.452692055030236 -0.670288704392285 -0.408817571450656 0.16212295414013 0.115873646686938 -0.056739905043379 0.611906938851251 0.591747159500791 0.647539933463253 0.641886637540102 0.74964557842142 0.853802967671849 0.405679146938897 -0.427518565093861
-0.964600777608715 -0.895062645730725 -0.970724039548738 -0.913971292752604 -0.961591112869763 -0.975222806812758 -0.916359288438604 -0.47611331477236 -0.988792780747155 -0.986959961919799 -0.111040219823262 0.910840823244792 -0.145063875007451 0 -0.750831410006902 -0.47511918959088 0.754729333146141 -0.474019432774366 0.556654254323511 0.975381576688266 -0.939316983433036 0.173158032938976 0.778055457093833 -0.680922533081826 -0.676364409110621 -0.286894955432792 0.658396054136468 -0.935763670653086 -0.757946028199831 -0.302712014881669 -0.899519353017052 -0.972438909419524 -0.139389685039881 0.334366650751603 0.269389431755042 0.6468081844399 -0.121865845064326 -0.979779014948933 -0.97657141271776 -0.966855043626892 -0.97720324960328 -0.965143621576736 -0.922781713897352 -0.951226296196434 -0.972717223980508 -0.962403131757944 -0.885255517985198 -0.924330283025948 -0.962028302220528 -0.94109356587682 -0.918791965706375 -0.930917831646391 -0.923547659377599 -0.942929702558095 -0.826208506614517 -0.869842128753268 -0.938677061887255 -0.938269092303488 -0.779120266015655 0.321483994767204 -0.918495613903226 -0.871783614631936 0.908028752511866 0.917544546532281 0.613246973830029 0.887942963163203 0.94895113284709 0.72735472201109 -0.0405367491979702 0.925589971568699 -0.965844299108881 -0.650786837618754 0.597455722435219 0.979929327384522 0.958770813942971 0.989647215108831 0.99607649760647 0.996178118394101 0.996592872696967 0.995499289813624 0.995757612166902 0.996054091963917 0.995870772868 0.992239418500428 0.9949271789207 0.993908058481215 0.981226456568114 0.98723345665614 0.988018320036401 0.954317163735473 0.954223564500246 0.958007844259909 0.974053260225668 0.932368875108735 0.85764926898721 0.893812345264641 0.428779451469945 -0.781394075377133 -0.839464645443191 -0.901158657239465 -0.923464367561407 -0.960449366433443 -0.972208972143263 -0.970789584371067 -0.969015971859494 -0.974520841377898 -0.983041710011894 -0.989772409634333 -0.986588569756047 -0.987835941482581 -0.990065890486075 -0.99091297871412 -0.987633933495875 -0.989144245052494 -0.991904559492785 -0.990568611191627 -0.985845876696815 -0.991192064948312 -0.992034793224004 -0.989569004817355 -0.986926136372748 -0.974120549181604 -0.981803214928201 -0.989347388651858 -0.909216910086334 -0.97467749379552 -0.979300368436041 -0.979573229696503 0.983294544561678 0.972945495552486 -0.99018802002359 -0.952340880917603 -0.964369202870403 -0.958118173399639 -0.969318794614854 -0.971822262818111 -0.970179263632357 -0.962478361301097 -0.939086714521806 -0.948349325481943 -0.963285507964987 -0.975154326930818 -0.96341946457386 -0.974538396282918 -0.962879978533676 -0.976889367537561 -0.981322059278979 -0.940476839709281 -0.792044653137471 -0.944467872268611 -0.955838086653818 -0.72292455429532 -0.759340166628267 -0.904086362180673 -0.837188073853755 -0.261409221398341 -0.559614601822905 -0.19604512584663 0.204965467085125 0.874721092390222 0.939152399410253 0.984415054461222 0.986729032461143 0.959275226865014 -0.346434678727018 -0.923918291439066 -0.938997392501571 -0.965704757217218 0.940282976866338 -0.983234949498213 0.940331247076339 0.985593302995158 -0.902596336031878 -0.983336732220023 -0.872545114937609 -0.862614931053688 -0.956605193270599 -0.968877903904859 -0.977582475813368 -0.984642327925644 -0.983844152556926 -0.989658560829659 -0.99226486960243 -0.992934911312785 -0.992761455657241 -0.991228670383333 -0.987087286549919 -0.990181288616665 -0.990725492020783 -0.987183108174734 -0.988807687623227 -0.990070022996062 -0.989657635347878 -0.985212386342135 -0.986544733833763 -0.987783445665993 -0.984707522931832 -0.987117197546271 -0.988270824648756 -0.988459695673501 -0.983920807828869 -0.98353123423562 -0.987686335958428 -0.971603573730875 -0.97434237090277 -0.94977364096005 -0.0331630828949477 0.916622855839963 0.93890317795025 0.972495782012295 -0.0895628812858056 0.701655458044398 0.909299076243924 -0.699233707948648 0.0912556840079516 0.938051372108943 0.841987995067267 -0.222601178534251 0.92633087762314 0.762656786384383 -0.937537924353946 -0.893379080236447 0.846463906736755 -0.805491305727088 -0.98861462349313 -0.92710014361166 0.929107024182797 -0.960314945646821 -0.993197338959374 -0.500257089596738 0.988207966103925 -0.852880261868929 -0.962883364600232 0.979098711585102 0.988163852635161 0.959968448366554 0.089182957330988 0.96968100129396 -0.98940612282108 -0.918799807658866 0.989876881803373 -0.884546762356449 0.982824518789085 0.974535084251751 -0.82637455799993 0.578894336278545 0.76393240334335 0.734334649097995 0.872663604995904 0.182045408415866 -0.648307660072825 0.939185715369393 0.75904696704083 -0.327203310284956 -0.868435942300984 0.915347112518141 0.842801148516319 0.372794759877057 -0.4930079709379 -0.698017522220139 -0.330783187805449 -0.739647922581256 -0.850609887790146 -0.88468851979844 -0.895005714684668 -0.844634133152581 -0.7322345706513 -0.910311253694419 -0.922991171012201 -0.880024420575119 0.509541953372272 0.0826220364239087 -0.698542333912221 -0.717776780005804 -0.869260875221419 -0.808049705012761 -0.415132039475623 -0.484679593344422 -0.632636983257586 0.200130584460574 0.181916042073729 0.283699599551487 0.351129938244442 0.623722477786412 0.777923084896952 -0.129861673596036 -0.682186758351505
-0.905912262787554 -0.347920954647208 -0.963034457975698 -0.723147700080005 -0.691632037416976 -0.937647850171154 -0.916340757885336 0.471573653213567 -0.954464056572868 -0.985703154445563 -0.891154290340108 0.981198767279656 -0.451220918446108 -0.750831410006902 0 -0.649402901345737 -0.916765371774174 -0.9700923691891 -0.956235989028893 0.115280832858185 -0.986640666750152 -0.858157866007387 0.184390506330258 -0.94373900072891 -0.790762215257531 -0.213308219990544 0.677810177513704 -0.959364379719045 -0.6811306514242 0.0303581580855865 -0.904375281839261 -0.974686788350832 0.426927633780157 0.73739263779351 0.856844570723553 0.858419232759455 0.660308285973519 -0.97280618463513 -0.965910735635793 -0.92773221349983 -0.969936083830758 -0.9538305967449 -0.845123738898895 -0.926852022271483 -0.970540615784161 -0.958604652858457 -0.842638977770304 -0.909096789764461 -0.962975233435917 -0.947879956027954 -0.917933812818923 -0.923877373997371 -0.915827687650763 -0.941613501703098 -0.685257828404646 -0.814202836132611 -0.920627713945795 -0.938526454970385 -0.756851902650672 0.742143583614974 -0.770580023270102 -0.710379839294503 0.927977449146419 0.957561743131735 0.846780702928732 0.912221163683694 0.962792953944622 0.876790103781984 0.106994969025905 0.896755673086115 -0.952498218699346 -0.883058389585342 -0.554934769322237 0.939480720271841 0.794844175679467 0.974979308271393 0.994862701716308 0.99573885691507 0.996288092204289 0.994488003723771 0.99522719648438 0.995792704653725 0.995367228693983 0.990493197160234 0.994960812708339 0.994138660973466 0.984602054734645 0.987836449434174 0.987498432242318 0.954554101529768 0.957867870903224 0.960885584372122 0.974168183026433 0.941529098151127 0.894499432091853 0.887218972552859 0.394477487854052 -0.618839089409883 -0.781518084816774 -0.892396315647063 -0.912602535373603 -0.953075956023409 -0.966711709823514 -0.963859516841116 -0.963902930117559 -0.969556055782069 -0.980982190607736 -0.987508355484047 -0.981746203454825 -0.984158943439961 -0.987279559800909 -0.988158208760061 -0.982482899276207 -0.986351710900377 -0.990107322426798 -0.987130672519607 -0.979467697307919 -0.989145702262655 -0.99007788599429 -0.984714882372854 -0.980188164064388 -0.960092667734752 -0.973076080556678 -0.986975463449198 -0.813557291124817 -0.963805287950624 -0.971720706198113 -0.967844515377267 0.984964571875237 0.978909432404961 -0.98741288719594 -0.93661052178633 -0.950389879666152 -0.935774201584237 -0.953134640266905 -0.95976872223367 -0.958344930092231 -0.944355378479888 -0.902931355296942 -0.911936665202445 -0.942727593652741 -0.962225059590509 -0.948772893675153 -0.960555816098543 -0.940915795708209 -0.960380405852384 -0.969300213763232 -0.899434836028054 -0.45399213965311 -0.846990544370788 -0.911825759586462 -0.30423128780471 -0.324358849787303 -0.75724673031363 -0.631363787138962 0.354908567815622 0.192519736123115 0.522526976886779 0.633401669004033 0.925431024283137 0.959655910234724 0.987025219358287 0.986597898165212 0.946350618796549 -0.810926231969548 -0.946625540044736 -0.957349761242041 -0.967900798307358 0.888765491653801 -0.979852610303052 0.962543254803482 0.984872523926907 -0.922408414939985 -0.97791964954767 -0.660290265589028 -0.764346326789452 -0.935475122338511 -0.949917208557365 -0.961746023218954 -0.976179306973587 -0.974740561904484 -0.984822058627878 -0.989344189992768 -0.990543438530486 -0.990457774608489 -0.987626994818722 -0.98256130397527 -0.988617551845262 -0.988780958341477 -0.983184448327263 -0.9872186207518 -0.988779118216446 -0.987653230544562 -0.98201156180613 -0.984550616268342 -0.985805390792535 -0.980494470791966 -0.984627260028012 -0.986499398441689 -0.986168097601882 -0.979311593161484 -0.979934981940687 -0.984750172395349 -0.957975321432278 -0.963594906094835 -0.919618373666677 0.452689717580123 0.937739234060556 0.953151015483978 0.9832766981482 0.839863544997296 0.933986718507857 0.971092132806226 0.51085399292735 0.841324595914387 0.972971004766361 0.945095575213163 0.649157210880103 0.95880494024506 0.898352469277796 -0.899536843452908 -0.854477617149616 0.839419584244525 -0.831293646435524 -0.989169959474331 -0.969988383539083 0.844123929095108 -0.951899289203237 -0.992198095387552 -0.0281953760480561 0.989341356254781 0.136464663979289 -0.939489024066736 0.97886532409722 0.989299647880211 0.968816348293262 0.397699632616246 0.970928405244834 -0.98770265791229 -0.941822206588101 0.98910918714373 -0.246512032687123 0.986760143047701 0.980155579795714 -0.502033881866044 0.808108930994343 0.875232476436131 0.887509466900285 0.924504060438538 0.434285323480414 -0.300126720737902 0.95354076452756 0.73883500711954 -0.593080109334395 -0.699242679766023 0.855813347697434 0.632988790029835 0.229020685389449 -0.152498960802584 -0.691352176175875 -0.302697123051731 -0.713106585453165 -0.921439303035985 -0.93331308999404 -0.867531972530798 -0.873173335545463 -0.874039126699503 -0.932472094596987 -0.935982943376668 -0.92958383573737 0.190612024957113 -0.302570514085941 -0.718140192759034 -0.783861387015583 -0.878217165915595 -0.810444801160585 -0.47869870785578 -0.539955504579769 -0.578792926786595 0.123081322471812 0.0850878635386443 0.241815382838195 0.322701160299837 0.596618188227238 0.736275100364704 -0.189143622384021 -0.683220236909626
-0.938360830397906 -0.694237377738878 -0.971927369223035 -0.934200454161144 -0.917353487188821 -0.943384811370563 -0.957912663867442 -0.882408102258765 -0.968192561545976 -0.943726247966042 -0.922955234568314 0.792562894003482 -0.742920351895736 -0.47511918959088 -0.649402901345737 0 -0.677619974392827 0.611544247017499 0.979500628945115 0.977519641658683 -0.94887699639839 0.917843272754642 0.941781778471995 0.618485422801914 0.890294301149997 0.919801791803174 0.954191897362883 0.229299362021245 0.873264935038577 0.923530631182383 0.469444135187937 -0.89775452697452 0.921751428569631 0.925045172248292 0.959100986746693 0.961360429617083 0.926574403604656 -0.958244768510574 -0.95045220211111 -0.419809265474344 -0.872573888213616 -0.769101971365061 0.578445784329615 -0.545244571585554 -0.939716771830618 -0.85842621638324 0.114216622412315 -0.619911391031471 -0.917768680834462 -0.831840966437961 -0.699199710816324 -0.822777291541886 -0.787923305375901 -0.803590782170127 0.372820952098048 -0.149519027833956 -0.422236225469984 -0.847683661222843 -0.352253001867147 0.897653911866022 0.206079877822773 -0.254898711246666 0.928881957181749 0.94544523967035 0.846931461225396 0.884546116132319 0.945830017167037 0.825935194293218 -0.181424383078482 0.863083235161357 -0.940788944040298 -0.897126554892923 -0.480808885712059 0.938421450042903 0.864857374923688 0.978518710075085 0.994652769109741 0.995674222363844 0.996168502945935 0.994097475729464 0.994942126107936 0.995531101669454 0.994949639381077 0.988190881240492 0.994423181389681 0.993595713428068 0.983698218596653 0.986976455822928 0.985894291742156 0.94877869910482 0.958978837937932 0.962316734779489 0.974562315427631 0.953601944293806 0.93938325532357 0.939320785490795 0.82225108103525 0.478322124395831 0.378994825516834 -0.325067393774618 -0.681757508501157 -0.883972724149304 -0.926339759323247 -0.938665744633446 -0.939701635137386 -0.937766414651236 -0.968178266258346 -0.983344893221858 -0.972862100715671 -0.976576952259119 -0.983680724029333 -0.985065553614416 -0.972432872902905 -0.979643408457298 -0.98835858608964 -0.983146804802235 -0.959773761640114 -0.985639337255897 -0.988175458101924 -0.977037178417333 -0.964429031017897 -0.911142526610382 -0.946327022122273 -0.976555457100053 -0.530998326744042 -0.949727208662146 -0.967121224689196 -0.948593371204583 0.987240227476164 0.984856628435886 -0.985159463637284 -0.835324711623912 -0.863575353193281 -0.832210445632818 -0.909826252331229 -0.922736188794572 -0.920930867878683 -0.894205967048832 -0.764693668739865 -0.774040780700982 -0.879144586079097 -0.930844839019419 -0.89170667142001 -0.931972644442149 -0.880227594751534 -0.926698271685208 -0.956065840526996 -0.747778815973767 0.290556239127335 -0.614757584674361 -0.832032792784443 0.216952368174428 0.169128064131469 -0.534152359269356 -0.352269699297336 0.581180035071044 0.443880721122669 0.648294570115597 0.68009551920196 0.929787600788817 0.957826375251195 0.986031292920823 0.986139138991914 0.955081068308096 -0.719865264863057 -0.940225854979624 -0.95005725030339 -0.96514557779176 0.938857363986683 -0.978363706706856 0.967803743571333 0.987135807007323 -0.854496779789037 -0.974844872410281 -0.411530672964323 -0.531893159762298 -0.903968146056162 -0.934127682363027 -0.950216893030235 -0.969039027436922 -0.969390834849141 -0.983777845128931 -0.988536327482945 -0.990077704572039 -0.990385631479701 -0.986592520907538 -0.980557202930602 -0.987969269608223 -0.987978362351544 -0.981469734386914 -0.986380244226271 -0.988139411240367 -0.986501107685308 -0.980307344431701 -0.983565480394624 -0.984646509921745 -0.979271768833256 -0.983743453134732 -0.985975073913472 -0.98557523060464 -0.978342642550997 -0.979155376412322 -0.983728233291261 -0.95600064650639 -0.963466992347133 -0.933151734663467 0.215283412228442 0.9166361431579 0.936834872949256 0.980484185726118 0.757448476308303 0.901632096913558 0.959232484194362 0.327968041892606 0.766767301067783 0.960630666747483 0.92339996017096 0.605734487239453 0.9345261093162 0.669903300459662 -0.931899702351578 -0.916236951994108 0.0166069657463717 -0.949934847420706 -0.991137592753959 -0.976615014874494 0.849693382015627 -0.9699698490555 -0.993777831036134 -0.0955807652614381 0.986843727757786 -0.873805668773588 -0.952180849726812 0.976924154561622 0.986362610998186 0.955537053477078 -0.0984259914337518 0.965311941395529 -0.988593656867593 -0.92004598531381 0.988896683970327 -0.869458167288179 0.979254187593335 0.960292669848491 -0.885278688981958 0.173002305599765 0.513846830640738 0.447046985772631 0.73199249415888 -0.322435618380401 -0.803042315139833 0.805973073234589 0.267320217056728 -0.596192853920018 -0.891958694399737 0.598479501125587 0.505985738959852 0.0583236579626651 -0.067663839634903 -0.731373089454701 -0.559112534707389 -0.578315329443255 -0.902780530600891 -0.946845114738762 -0.869415414184901 -0.719323309685448 -0.783220460817522 -0.913920114097749 -0.906206061502637 -0.814709114224759 0.617933557912659 0.136922094355464 -0.24698182523856 -0.417246806425783 -0.537411549097268 -0.130035117623697 0.237048977705163 0.201190403039961 0.200959605035298 0.629338197248065 0.559449540330001 0.663121631038651 0.660942692534491 0.742095824861016 0.834632374008879 0.340374085095659 -0.48186798107051
-0.915729526420832 -0.501795090463449 -0.917035440783273 -0.788392557181862 -0.882678212418728 -0.872889140320098 -0.638561656168888 -0.302243937417843 -0.944400614678475 -0.699319903152197 0.19980046384994 0.938679548757438 0.874406831118722 0.754729333146141 -0.916765371774174 -0.677619974392827 0 -0.766698158599343 0.953095847561544 0.991720457041318 -0.984468283252122 -0.448766281416026 0.682480838064585 -0.888167350980346 -0.910674694226654 -0.859291262612627 0.419680683879884 -0.958295919890365 -0.888648746858539 -0.698710685828465 -0.931506143950177 -0.982318438500902 -0.33046839251728 -0.0878500464819862 0.171609638287436 0.775003663478045 0.144466564706975 -0.983380595392325 -0.976926315228354 -0.946591947783982 -0.965134314913835 -0.944015148746678 -0.827865396753738 -0.926263765547489 -0.97022999718805 -0.952480271034973 -0.856212324924272 -0.91126347603183 -0.95524232694242 -0.939463203767325 -0.922224996611341 -0.93226090145169 -0.921254865302569 -0.947897142228387 -0.771439303200524 -0.736594212292588 -0.844016905939591 -0.929974964622253 -0.725475201223179 0.870116344099414 -0.582008527993171 -0.697894077679908 0.924471176824663 0.93400925824109 0.793667909764262 0.879877902066464 0.949272893596197 0.784908062885792 -0.278618194120548 0.839759510074823 -0.958338289357577 -0.858399041291062 -0.240805296357526 0.962575996113674 0.923825839419681 0.985295342778579 0.995507494273117 0.996009016032209 0.996397385050028 0.994778745073302 0.995391053398241 0.995876733388874 0.995528581611493 0.990907795021456 0.994997956171504 0.994074211934387 0.98411788648674 0.988601173578085 0.987779713799389 0.961357830262575 0.964788278921522 0.964696841348626 0.980550064491681 0.966193454324373 0.948045371835283 0.956114645210031 0.924015274914471 0.691309273327107 0.608938777921818 0.421134002865456 -0.254661846270882 -0.874279789483044 -0.924841323138922 -0.928834097089851 -0.932855696338963 -0.94288539091254 -0.968800204970941 -0.982275784473517 -0.975819637862336 -0.981145175662688 -0.98515750739116 -0.985913814494124 -0.978562068010452 -0.98286161505101 -0.989117556842853 -0.985627232868056 -0.972126080509235 -0.987642880906081 -0.989313549514723 -0.982567640822549 -0.976022688227938 -0.942924803380355 -0.960843512579835 -0.980733685751614 -0.767376859688794 -0.963537063314519 -0.975201971993943 -0.967508477355297 0.984214985750638 0.978502109010592 -0.988403057400678 -0.908393769116411 -0.929144723419336 -0.914787835261973 -0.946862849508983 -0.951292971507043 -0.951075317219638 -0.934621061434416 -0.864556881792221 -0.882648671724695 -0.93089912146243 -0.953687909747408 -0.912292817801623 -0.947539809248978 -0.914479707234634 -0.943570540256801 -0.96288232290848 -0.76781372472926 0.135400792644337 -0.737536181023764 -0.835074880589235 0.0742883627798182 0.0130104421802571 -0.502192604334693 -0.123107605637535 0.570278455641275 0.371103420717651 0.723221617271487 0.791646829429813 0.946688261639564 0.962871330330455 0.988373386470646 0.989303763977095 0.974373045483597 0.495731955758016 -0.731580447695818 -0.881240557190909 -0.909801395205117 0.978760831651094 -0.966591376582308 0.975431726495742 0.989164569247195 -0.437764157876036 -0.967825811250053 -0.337864290165206 -0.325809047490367 -0.848160528046402 -0.920269087721199 -0.952624741717697 -0.965432304386978 -0.961896061146755 -0.983385524030055 -0.988650275500831 -0.989311533256435 -0.989691889220446 -0.986422066583372 -0.980805986032196 -0.987533674730068 -0.98769385890492 -0.982107139536489 -0.986382218617905 -0.987944402585475 -0.98667175519263 -0.981148205478103 -0.983629497095208 -0.984759681083112 -0.980435030554041 -0.984390201389172 -0.986022112274759 -0.985933509949568 -0.979853740038805 -0.979726771479198 -0.984093260234873 -0.959338035856961 -0.966574557172258 -0.937445365956401 0.298121007921568 0.927229149686386 0.948774297142756 0.982920554321741 0.781829590619839 0.896175033770395 0.959904188680969 0.414229500761045 0.798612341789602 0.961909365382646 0.928741696626237 0.676451979194665 0.94736288328828 0.711683289773559 -0.924372881170351 -0.889767937490033 0.336936141865627 -0.948385475686436 -0.991151940729501 -0.975859796474104 0.848099643839942 -0.971540449241029 -0.993488846442213 0.476666706046315 0.985992622052064 -0.728555390241578 -0.877235159909115 0.978091991240769 0.984409257108878 0.962323091749674 0.474834707825646 0.962215721327202 -0.98565998407429 -0.809277962167151 0.987536538766739 -0.926237690579924 0.9755483130418 0.963688742178542 -0.894770360139236 0.09688391573838 0.629130475832703 0.479515554685267 0.633903413848423 -0.196028555130636 -0.457212486685628 0.83847386102046 0.316291434817658 -0.0226760450255246 -0.312376863322165 0.756733564943305 0.785884135640752 0.0855146893575636 -0.0924800982402725 -0.6636092316552 -0.699343938673106 -0.872317023191408 -0.921101208721227 -0.941473702984191 -0.924349999877249 -0.885772080988725 -0.829929652845329 -0.927418837104138 -0.93924494399442 -0.909013903099599 0.292014829704494 -0.116326258778805 -0.687267896934235 -0.734660142963197 -0.86121533252567 -0.800112490885811 -0.461059744435481 -0.517746961709428 -0.625640464936441 0.126675590872114 0.0788741060893419 0.20040685703629 0.265685410748408 0.56172120767484 0.750132755147541 -0.193452490708247 -0.712313242551761
-0.956876738642645 -0.879489918815311 -0.966640212303178 -0.913226081680892 -0.933660407526183 -0.963768559535828 -0.932418169867335 -0.739018482441169 -0.977534499166394 -0.973747293423373 -0.924895809317818 0.835639711571372 0.217796327853472 -0.474019432774366 -0.9700923691891 0.611544247017499 -0.766698158599343 0 -0.909002777518989 0.987177361489333 -0.982490021366232 0.594121827413122 0.851660000925345 -0.824405883777248 0.08765569116363 -0.269732299673001 0.809451248285229 -0.953048781298721 -0.551640080729002 -0.241730866254427 -0.933134211489436 -0.975514597238224 0.448229910119958 0.62363002621728 0.802744841414277 0.865239441643561 0.755195403947303 -0.975037473996256 -0.967022843390196 -0.890911239739918 -0.952755779859893 -0.907035832488126 -0.429749870640221 -0.860597651469537 -0.958020325030275 -0.920902983361399 -0.617878246771821 -0.827347950992693 -0.938563594816976 -0.901040139674181 -0.874654821241833 -0.888274824859181 -0.843923017813526 -0.929422094383786 -0.604879607700669 -0.430956444365471 -0.731458021828712 -0.934562222670963 -0.754869249938434 0.883677564781723 -0.477200677594698 -0.771400009163723 0.876181814214233 0.874641024464436 0.722812210451749 0.813794600933845 0.917750364353657 0.517301904580105 -0.708469814086766 -0.140574779033746 -0.975713717001208 -0.955806918759886 -0.919919552584507 0.762398275060188 -0.34889992749766 0.934011283764737 0.994333807468003 0.99562443619202 0.996183551581862 0.993818570493996 0.995048981869518 0.995731040902196 0.995236750527542 0.989758454255594 0.995035882883953 0.994157216221459 0.984084287678961 0.989412064253005 0.987919271678147 0.960626026871625 0.964599043182478 0.964467842367623 0.981643241957428 0.968805390926319 0.953616575856495 0.960990580845952 0.945382603806281 0.850346210973429 0.786585915148154 0.746599152235222 0.347797313343435 -0.805075644578046 -0.899030130041927 -0.900868420528197 -0.913819479421378 -0.930210405039785 -0.967877086549167 -0.981452085307211 -0.969181096556351 -0.977755217942651 -0.983721186124562 -0.984778052654097 -0.973210536084132 -0.981964106265017 -0.988378458109594 -0.982420738026293 -0.964670532309349 -0.986327161586939 -0.987600419924757 -0.976098835186241 -0.966938592977915 -0.905127064017196 -0.939339587378386 -0.981966839872343 -0.37692759320301 -0.946769908512216 -0.963139127940124 -0.952895198888143 0.987604995338349 0.983832407158481 -0.985896523505683 -0.871999332939378 -0.907755712956444 -0.88352010905908 -0.920631687876486 -0.932241663825468 -0.936657048980092 -0.907699721277108 -0.752074162488927 -0.78498827222569 -0.90003565110135 -0.936078104669851 -0.868817177527512 -0.920682834861752 -0.869495111797362 -0.906361702538917 -0.942576644053128 -0.502547451814809 0.551192601728495 -0.160038951486404 -0.524266836535958 0.486088335369854 0.448326044021024 0.185487789018913 0.432279286690919 0.705426659759303 0.622883061971931 0.85003572452384 0.871713194829985 0.95649138677721 0.966983036820106 0.988722342924918 0.989076504160697 0.974175881959515 0.33556659554333 -0.654220087231623 -0.923100776472078 -0.868777563435525 0.982801634068441 -0.945855718930955 0.984710351106747 0.98990857620537 -0.331607069542423 -0.947865387226521 0.514993431955123 0.319219673974232 -0.606569232779415 -0.809763850807968 -0.901255652399583 -0.93382639127257 -0.916312045064545 -0.974560426659257 -0.985052316654649 -0.985377252615181 -0.985777637916057 -0.98008942789877 -0.971086473172455 -0.984596728481304 -0.984241566175645 -0.973059564305718 -0.98314605805633 -0.985370218174665 -0.982728894065736 -0.972780494670583 -0.978308739679392 -0.980091215478562 -0.967892486539539 -0.978025127141003 -0.981244110069002 -0.98007537995113 -0.967085392666518 -0.968016564254579 -0.976105220087028 -0.906851106588325 -0.930333741988494 -0.731677977122551 0.893499047795405 0.972076066028908 0.979937006243114 0.992844240864544 0.978814847751548 0.983704795777215 0.991447168516446 0.970327237153418 0.97837845147571 0.991169969565066 0.986723136047848 0.962495140798208 0.987292265028875 0.979998975603699 0.00605524178017172 0.223511901352706 0.960992775665943 -0.556345677849997 -0.98978201422696 -0.98308314556815 0.876568860173395 -0.936167553935066 -0.992022189647473 0.894660549697316 0.991764215446845 0.936275096185496 -0.081643205767709 0.983031719144008 0.989592769008412 0.979911067423544 0.798021362331399 0.96677769222164 -0.98587196845611 -0.92807410784411 0.987269659168981 -0.893532983753977 0.98438569269559 0.979464383269823 -0.85234402329982 0.2507939669113 0.762597808969347 0.726714859770936 0.719566757234027 -0.440063764184598 -0.136601467784337 0.922171332196854 0.289038351220931 -0.252327590869691 0.626119903209151 0.854813653683732 0.904777224978482 0.864948041889366 0.935056523720481 0.8382162349181 0.832984222905106 0.637550471888018 -0.459607319923952 -0.357117220999918 -0.0866938154641528 -0.450002842347152 -0.350814197830996 -0.806028232148325 -0.815708622093367 -0.789331799184339 0.84865974874549 0.730527119768235 0.0345358466127246 -0.284863010407031 -0.717880095599457 -0.623288484886571 -0.0519504712200502 -0.190279116704382 -0.510164719489884 0.208777986129592 0.153458772761631 0.309396627695994 0.316545865841464 0.587179239156142 0.729722544403111 -0.384641377510302 -0.776114750271743
-0.92653456067854 -0.567118433003992 -0.965929915732653 -0.896979304172891 -0.818112954475332 -0.920371477097217 -0.941660539963126 -0.687230385773567 -0.926216874176493 -0.942857166704801 -0.93521699949005 0.915055272637421 0.852421651051768 0.556654254323511 -0.956235989028893 0.979500628945115 0.953095847561544 -0.909002777518989 0 -0.917664253448038 -0.986754977255178 0.322581402357308 0.924219277441556 0.817046893077006 0.947303647004563 0.862101938020885 0.95530896484047 0.502726091185589 0.836649385861313 0.867263400352446 0.396921490509765 -0.88711372361899 0.912806156111625 0.911072454765125 0.966935355208118 0.960725151435358 0.950510140899267 -0.945942265969116 -0.933706913208612 0.482886148818333 -0.553921670836913 0.378937859320892 0.90518103737901 -0.00570441772336823 -0.906049112131243 -0.534032787255123 0.53206516097738 -0.533497415941152 -0.913176200649026 -0.82258793470558 -0.815560460632567 -0.862255399342837 -0.723856583706906 -0.886321453650338 0.0572337036384073 0.0359630854394693 0.29655652599865 -0.913628799354229 -0.790249464253092 0.859741326593776 0.581098212768934 -0.639108088500977 0.747449389024405 0.834372501261403 0.697737410003969 0.647408446996627 0.855886602325093 0.470809081286281 -0.777538584761009 -0.485048541572718 -0.966166652850245 -0.96925464811101 -0.95084451208923 -0.320053247076436 -0.84551968265307 0.523151080431267 0.990440771369257 0.994470822907959 0.995371864850487 0.990731349970587 0.993644886273556 0.994737541075765 0.993567654737697 0.981439106370266 0.993903037926396 0.993030967964408 0.980937514420824 0.986576960894003 0.982822725996969 0.924533504540558 0.943213542582339 0.946906486215476 0.970143561395986 0.945563276520138 0.926308886102799 0.928585047530327 0.879697827621081 0.772312893613126 0.680325910007632 0.48113236834079 0.0468740260100828 -0.78540830592158 -0.878900493971399 -0.891445529071815 -0.903897432197005 -0.908733231786475 -0.960681818158013 -0.97720809815923 -0.952347269592711 -0.96467880937048 -0.974598941022698 -0.977326034853424 -0.945209845861451 -0.968141600706743 -0.982005783260673 -0.966241398809396 -0.897104553070857 -0.976567026338988 -0.979753706524256 -0.93842252193111 -0.902722487590473 -0.615040590077124 -0.779653097633136 -0.964631947441968 0.401280843386517 -0.909645539703019 -0.946922633246548 -0.896074781323072 0.988759619987046 0.987016626880946 -0.980402567726668 -0.739008277042775 -0.798217842588884 -0.745572557090775 -0.843788965429927 -0.874684138619565 -0.895318676797695 -0.846333600617143 -0.454852589496785 -0.445840083189473 -0.816860223623801 -0.898528199076021 -0.794316112274864 -0.88479329916662 -0.8017646082035 -0.853214039109251 -0.921323340877991 -0.333101734042194 0.673932195098388 0.322226609247012 -0.298189685170695 0.560680742447961 0.530098278196007 0.265490094683382 0.284474945956158 0.638859476719642 0.577285226152781 0.805264199220766 0.814364684586859 0.933894359101223 0.959774822030229 0.984684562211395 0.983294370570111 0.947328076475149 -0.721130258633343 -0.903067609849954 -0.956258171010815 -0.935508567654314 0.972565203239485 -0.955477474544066 0.984544501399105 0.988950328103453 -0.682487944476709 -0.946288182360475 0.640536701502506 0.346890269213134 -0.587391801984022 -0.755118515546223 -0.852795481672487 -0.908304906320582 -0.887657966924496 -0.968050062624292 -0.981182377710453 -0.981642666221845 -0.982528578241767 -0.971678421887992 -0.958735978760454 -0.981643682567581 -0.979982309956722 -0.960026461852851 -0.979003283075662 -0.982332187080581 -0.976659052342208 -0.961684947603447 -0.972401978259498 -0.973969083102672 -0.951321654970567 -0.970586252264518 -0.976595722814629 -0.973407944921134 -0.952814387786761 -0.957035308797001 -0.966894015335425 -0.838935286134269 -0.891611827396744 -0.544287791165441 0.915974197983893 0.972408075220321 0.979214991440637 0.993289818332324 0.983869255222993 0.987218103822646 0.992701740926846 0.980299198502275 0.983551606848107 0.992154852956329 0.988717023821021 0.97251723655354 0.987418165107717 0.978741625040346 0.242328120111964 0.138372113886729 0.926377597355229 -0.833833312013118 -0.990048070799336 -0.986536635508351 0.746774024745305 -0.939875024680813 -0.991456139591407 0.883809509153195 0.991297808175377 0.913828161692724 -0.331042710183041 0.98259566328015 0.989526425924451 0.979128361668438 0.762760273386712 0.968136924619792 -0.986775473189011 -0.940603973631246 0.987877916527075 -0.807694087715689 0.985287689057947 0.978169689306631 -0.785546984161977 0.527976182643937 0.808251084223059 0.797083843893494 0.82702933343763 -0.130862823090113 -0.170114004818198 0.925283827442114 0.494518266217421 -0.123596758064834 0.489358674571133 0.853900886200947 0.886356180848097 0.810719193916934 0.917939520412968 0.784195489682098 0.749393293278458 0.679365155715246 -0.484413899776243 -0.572437386902034 0.0988000665429706 -0.0332575437038698 -0.271675467539438 -0.713524206618279 -0.673395357382635 -0.584377733098991 0.895402160520843 0.813299748137297 0.7070160982313 0.486363476681953 0.196616471513633 0.3810393263881 0.553345994670106 0.494942893208243 0.280183791146451 0.588148300159905 0.532579310502723 0.637725998608245 0.591708281092403 0.708651721946929 0.795416444294173 -0.00600586592949019 -0.669953486772293
-0.692579370039543 0.761753252732219 -0.625213485699131 -0.123007276590278 -0.0144166059324506 0.368627581207059 0.427761323396233 0.606321931415222 0.0450498416764357 0.86766550971179 0.71456320004459 0.965615430477232 0.972020103267139 0.975381576688266 0.115280832858185 0.977519641658683 0.991720457041318 0.987177361489333 -0.917664253448038 0 -0.873872466594481 -0.994664406330511 -0.985975932252751 -0.924405452303153 -0.842520177457485 -0.972074336626752 -0.478712988980992 -0.906959005959333 -0.885176080157387 -0.860320119950724 -0.91809375546323 -0.975345351021186 -0.171994204258522 -0.280582359517927 0.745798176502267 0.92416595370847 0.883949258400343 -0.976760428258552 -0.960913617662403 -0.122628700360493 -0.50648814845128 0.525579127615506 0.825447869088096 -0.448259144478602 -0.894245537210426 -0.584723303371359 -0.393777756004163 -0.791287153662951 -0.886186954570721 -0.88800036599004 -0.923770245263803 -0.906909622865967 -0.770352353895888 -0.940473347177202 -0.590245069231757 0.314064489441652 0.585038831662345 -0.922358954844927 -0.800734901412137 0.902023987258418 0.547363014019764 -0.701929075728919 0.812355474187842 0.896079616445005 0.680563937421339 0.646409036375338 0.90349608527283 0.611317305836004 -0.769928292889304 -0.13312409203797 -0.958564147391814 -0.956414369599889 -0.910077322694192 0.660513837371641 -0.134922203021305 0.92403009094504 0.992756879591692 0.995043156256855 0.995588588563221 0.991813449851004 0.994052583388266 0.994971537762328 0.993934536788301 0.983310746696123 0.994114963788094 0.99311625414282 0.980914629123431 0.986353904186579 0.982414606652184 0.930383414536367 0.944388854522208 0.944441821721196 0.97349572967165 0.957228689051752 0.936546169519527 0.943570856667781 0.93947019533339 0.899334708131604 0.867598412759852 0.881545580103837 0.829417784830527 -0.187930943348375 -0.501231409802488 -0.63258425413155 -0.702317183322197 -0.529025319240064 -0.757446274862081 -0.907423413516637 -0.797058042283465 -0.904937471546869 -0.91095452146904 -0.920281147056934 -0.808737177235611 -0.908786692306534 -0.951349761159651 -0.896988596654968 -0.603489873700669 -0.951881607311007 -0.958850982472315 -0.842595279811159 -0.788284568559175 -0.0390697076692483 -0.22834993078554 -0.900882004918107 0.506448974378938 -0.899326870472575 -0.950998301432838 -0.889080329823602 0.987495936485509 0.986185925190183 -0.981926317535556 -0.601475570033739 -0.718566581277874 -0.674570837045216 -0.793706952697567 -0.815763692819196 -0.880130558884011 -0.811993847380478 -0.0144560077038798 -0.0560608276614491 -0.76902106094984 -0.854837193016536 -0.440957254571223 -0.73962983323325 -0.665353944578298 -0.685968765067568 -0.847372582780859 0.293010083261429 0.785864696802364 0.603130983741776 0.279828075303318 0.697684938509254 0.665656321471778 0.625542636457788 0.663665472654062 0.749153760391976 0.716214810275398 0.890556123335759 0.898382172558291 0.955083963412494 0.967492790873593 0.98711466648465 0.986856842050988 0.970312401128012 0.321232741415891 -0.590708688970971 -0.871007402933698 -0.790057788873667 0.985975711568376 -0.903145497543435 0.987498340040933 0.990994757634775 0.561378523549843 -0.880106233903059 0.829134058875936 0.784575711515937 0.445134528866583 -0.138482827998931 -0.625847255475436 -0.665133591157846 -0.454054598971599 -0.932499332084719 -0.964813504127707 -0.960281984308011 -0.966300907890586 -0.936250362675272 -0.905915375702304 -0.969746792460428 -0.965660717808017 -0.927140825224697 -0.966738683410092 -0.973670346318317 -0.962312483235541 -0.939834441674772 -0.959162944152983 -0.960701483491649 -0.930400548238774 -0.960574668486794 -0.969474815035255 -0.965355927437051 -0.943098308818411 -0.946987918363264 -0.957312581720939 -0.810197736561381 -0.891837732290374 -0.674182238744312 0.899542445152766 0.966890454038364 0.975489105377477 0.99267479165142 0.981042610537352 0.984121325294414 0.99088726141008 0.978593037637847 0.981727056790346 0.989947953142244 0.986334742532263 0.97375267106276 0.984432910382932 0.96077474549424 0.2700538823018 0.186958589268937 0.757776779144993 -0.915446502337283 -0.988133704938442 -0.983570673706608 0.821459494002703 -0.915425684602219 -0.986838074755361 0.933538158826727 0.988712396428557 0.865183228156448 0.632875717549492 0.983329622265965 0.986436560703494 0.978666934092764 0.902737329494961 0.974935629841747 -0.979214985516065 -0.477372132487115 0.990089620002758 -0.76870428207061 0.985102817670268 0.979345663922538 -0.652916009284272 0.793815861297386 0.921203138911351 0.892847907065721 0.898021098739297 0.771066141248634 0.798673146345439 0.948116348620807 0.838218554158812 0.881091117044947 0.932296240924565 0.927253947078691 0.950190485259903 0.93519732334116 0.96409594381358 0.934495029679571 0.841127244880978 0.619005584003289 -0.143813036259972 -0.176115924100382 -0.0195766521006698 -0.342243426599041 -0.309756855331903 -0.5848896966941 -0.759584906100383 -0.826076419627691 0.785996944117651 0.746514225933279 0.571998421970319 0.207748158781787 -0.315836849510552 -0.256657578564413 0.213530989059849 0.0377930684790738 -0.258621290079595 0.255699581031579 0.211097169145291 0.295842718365704 0.196317886498006 0.501127539525744 0.702000337176471 -0.340293731224122 -0.76463134000672
-0.965503896561191 -0.911043042435663 -0.971338304943411 -0.954937223781086 -0.956864383706259 -0.964491570257528 -0.955409483448172 -0.925071792462628 -0.975332566828334 -0.965268843701644 -0.955519790440313 -0.620013754211105 -0.695305483692756 -0.939316983433036 -0.986640666750152 -0.94887699639839 -0.984468283252122 -0.982490021366232 -0.986754977255178 -0.873872466594481 0 -0.926132213875471 -0.392932116407425 0.552252066872397 0.922290070123336 -0.816546757809968 0.870996783249129 -0.734447821844751 0.612090868172763 0.372633331595805 -0.814393957887636 -0.966840451792567 0.777351146221224 0.677668288264831 0.88623046412168 0.945383543076507 0.913534697817622 -0.973979109115584 -0.960957269881866 -0.13153737786475 -0.47126109768943 0.550736217326523 0.872444748668661 -0.0342348994991424 -0.796100288500362 -0.0681421249110951 0.370243106470431 -0.317932082720779 -0.726805761417691 -0.635228326049898 -0.756086879717297 -0.829392294301002 -0.713012203474002 -0.895390523061476 -0.558190680918282 0.0270551783302649 0.329894093956335 -0.91064665095443 -0.826695418781207 0.697403371345423 -0.254415634996772 -0.804470614900057 0.583639219239079 0.532476043288337 0.383312709296825 0.403008364609495 0.749550918819809 -0.215221118016583 -0.868158746730808 -0.796365342511245 -0.978345339520241 -0.970642727207248 -0.951871849005863 0.175953506614422 -0.760389833065925 0.852032258595874 0.993231331539906 0.995328702370753 0.995903673620035 0.99252802077796 0.994536796106288 0.995420454141891 0.994717905247179 0.986359602024022 0.994605094301739 0.993590280579301 0.981502491845754 0.988576242794357 0.985574418502245 0.946035026384129 0.955867598097617 0.955552245250567 0.978878179680953 0.966119815984656 0.95382798865663 0.960848374963083 0.957882839907543 0.93592620482829 0.933967105853619 0.934579690973407 0.899221881467981 0.417556941753313 0.218605457299561 -0.41375096208599 -0.555752312589899 0.000394761182110464 -0.537462832091161 -0.882122373556554 -0.700300043425644 -0.876100494381885 -0.909217596200041 -0.916392132567363 -0.781855760420535 -0.914337667771976 -0.957556248946455 -0.901255921493056 -0.625737526703332 -0.958999155538572 -0.963400593471948 -0.855407550599451 -0.814592691241925 -0.137567256243566 -0.328369708644795 -0.927280508988372 0.555746813573456 -0.893647999285935 -0.944282142116601 -0.886579032037873 0.988467316980675 0.986808122431896 -0.980085987972837 -0.377171980520607 -0.55596891164662 -0.532549176271347 -0.715623814147068 -0.740761369938291 -0.834918867388027 -0.743848194465547 0.198184369225111 0.147530484260156 -0.671129338888596 -0.782904744000271 -0.171940290329403 -0.60301012519476 -0.492996302600369 -0.508289166244453 -0.817153053097693 0.452204726492723 0.823740264202855 0.638703528013731 0.368274340524696 0.708547675404123 0.690912481376712 0.650509026031561 0.690354901639394 0.74497755717767 0.669936387525717 0.871742501188869 0.881497580523899 0.954155110827984 0.96376088420681 0.98755832018894 0.987780378425265 0.972977787767841 0.535207291212663 -0.243668509092392 -0.900939576884129 -0.641654767679815 0.988571306943516 -0.865136316850038 0.988597434129574 0.991480140217821 0.740143883183537 -0.850198901876362 0.827926584789879 0.799044817948003 0.482367301786101 -0.117402654922588 -0.600465044332562 -0.60612087338863 -0.443130173480424 -0.932806093821842 -0.963653245610133 -0.959807194152041 -0.96647732191844 -0.936407715545011 -0.912589231882559 -0.971698123066932 -0.967146707726697 -0.928322694706729 -0.969173750260889 -0.975233355392653 -0.963981373006099 -0.941184303899497 -0.960931452438682 -0.96228296827943 -0.925381713795878 -0.960307694572702 -0.969001074727145 -0.964375259025099 -0.937478700667974 -0.940971068938902 -0.9543371905498 -0.749706956945846 -0.85734450794883 -0.257580086860097 0.943742828224541 0.978725818481627 0.984970985056797 0.995126977916685 0.990347682593031 0.990958919191947 0.994601100597443 0.989551388613315 0.990480482488107 0.994332282691025 0.992225309408734 0.984878770990647 0.991617852478888 0.984781843499013 0.785052009839446 0.745769207079492 0.936840142739663 -0.87837191809487 -0.989424620304998 -0.988420656922973 0.40308786923973 -0.937276610008636 -0.988751284223265 0.902261161193685 0.987844447784046 0.897128680012194 0.563063788505185 0.974350697166775 0.980714852172481 0.971649611700975 0.708088450337247 0.938319259495846 -0.984758745788517 -0.912350855127214 0.982409016137901 -0.96048404733123 0.972566505211493 0.962860984166983 -0.944633792371393 -0.689305001045858 -0.00228743480672029 -0.270712371437475 -0.34447273001021 -0.816427844978982 -0.71477106081127 0.656068744565748 -0.58630412734236 -0.619114897113458 -0.0489422322153381 0.503372497186692 0.694681061320368 0.0113197867047861 0.627474805045279 0.86040799613034 0.707022214295553 0.634570410389221 0.668684957015583 0.5485942132037 0.571144969802025 0.590295783650721 0.663766946832142 -0.169152791706088 -0.151422318273707 0.0907561873844318 0.947010942038792 0.930531298129408 0.828756994113021 0.725107490724615 0.339192482162729 0.363604012426551 0.597276980136389 0.535975230943691 -0.00703882246937796 0.505253324901809 0.443356820992843 0.575191006919842 0.487879750195422 0.645295653181074 0.780650848242592 -0.287355037634943 -0.788185966505655
-0.927688636183425 -0.704854390548829 -0.950731393664533 -0.846810004067245 -0.823507844256614 -0.921063623728211 -0.890886496498661 -0.4461253462064 -0.931005446602734 -0.933585425623148 -0.867793225760184 0.878387605523756 0.693761161316286 0.173158032938976 -0.858157866007387 0.917843272754642 -0.448766281416026 0.594121827413122 0.322581402357308 -0.994664406330511 -0.926132213875471 0 -0.882580392676516 -0.86440196918589 0.972836109583778 -0.0952945372884389 0.872294476047286 -0.840096917695186 0.573775127047334 0.061924636875664 -0.891877946158865 -0.960759133447568 0.846068416865654 0.796382686375455 0.943917350640816 0.933504451711213 0.93937235558709 -0.958335201484297 -0.939913696489964 0.584986179962269 -0.0184609216163156 0.845656861839172 0.94466979634626 0.382787964146184 -0.757761676305406 0.55590545761524 0.748586363438993 -0.00459813224134343 -0.808460520289954 -0.630867671933468 -0.731156488963396 -0.615077901165121 0.541639642546508 -0.450820760767344 0.612623108118318 0.805446979268803 0.920101973845913 -0.705525013008025 -0.489864744684046 0.886113015590848 0.893267749229267 -0.0901453351457566 0.805572753969876 0.852722408677348 0.833191812149493 0.768818594043624 0.882920698930454 0.584530626437658 -0.756585465444716 -0.802249245029852 -0.973470364279494 -0.977256204512363 -0.972385053765215 -0.831460134247843 -0.943929878586532 -0.741639318598439 0.987718683658765 0.994286718600844 0.995317491471735 0.989453687989476 0.993723552531501 0.994975788351873 0.993888214645069 0.983396561030675 0.994490991482636 0.993642213946992 0.983497988337618 0.989394552010307 0.985783869033272 0.952759994088522 0.960328323710844 0.96095905848082 0.980089846831769 0.968022639501243 0.958523927019969 0.963779334140167 0.961969981278078 0.949349943944296 0.944079060438851 0.945680146448958 0.924451836454847 0.693164543345008 0.51100672118702 -0.093030915544747 -0.314617942521424 0.301460557742287 -0.538156256887956 -0.858671430991533 -0.289875019882349 -0.815213240624652 -0.879811424825375 -0.8938161141925 -0.663089887257616 -0.918106499491685 -0.951817901736917 -0.851032201414449 -0.540563692002337 -0.954887546121978 -0.952635255155939 -0.714718335502549 -0.681364514279769 0.219542826554459 0.0458961689005029 -0.94041474104084 0.721218940187513 -0.865393321434661 -0.929772739277295 -0.818323724160646 0.989314992771881 0.988157618873911 -0.97619593126479 -0.472792553151448 -0.606760531178419 -0.474075651984732 -0.607901044313126 -0.683463142892736 -0.804686466732374 -0.650025259697661 0.564088760845416 0.631227558385341 -0.357903549633851 -0.635215044229931 0.304941257847436 -0.145602152213479 -0.0656244504201942 -0.0428914274568352 -0.451635925051656 0.751521844986253 0.884757963179194 0.853502010818934 0.787773979685608 0.84598777895252 0.831014283744898 0.845213243287556 0.844064602481642 0.847478154782865 0.828468715178106 0.918198229875715 0.921600787953145 0.960805463709656 0.970848461123356 0.987666893314726 0.986559615604381 0.967909820926592 0.390508933157645 -0.0911390757976346 -0.905434236445267 -0.439564008467286 0.987035612867274 -0.616002216952798 0.990480341608001 0.991298964054798 0.664556556326772 -0.566507039958236 0.919318319602067 0.885147548485279 0.759445683177824 0.533844315538955 0.0764648856303628 0.056381534513802 0.276543454770799 -0.879216299290636 -0.94764651958225 -0.93896887449484 -0.946767139074352 -0.882857410951163 -0.864055439151205 -0.965573607101807 -0.954180664901395 -0.873252547513443 -0.962013284553866 -0.969328466348347 -0.946786173442337 -0.908586432178225 -0.948260977523246 -0.947245809234112 -0.844621110157935 -0.941400242858321 -0.957245958074658 -0.944975918873041 -0.891780526911447 -0.905258096974533 -0.926133661345116 -0.390735299807012 -0.66360854207514 0.591873094336002 0.965878252948514 0.983564447222947 0.988355709430195 0.996222492110085 0.994543941652379 0.994717222600057 0.996627386018716 0.994615792654797 0.994452216185682 0.996518210490593 0.995408569467642 0.990862438238927 0.994318411691403 0.992571409897567 0.942090777805389 0.906456772495087 0.969862374752894 -0.587601929982587 -0.98811039148735 -0.989321742072918 -0.191355150354923 -0.890493982851224 -0.98715916831311 0.93554765435468 0.991309155024071 0.970407156925552 0.829894737193481 0.979064876642114 0.986858524020617 0.980603598976319 0.847417399260009 0.950918308668279 -0.980907016714888 -0.927217027573823 0.98143419843601 -0.88719385502892 0.983614248959325 0.979110681619551 -0.846426096058021 -0.025579825312587 0.707601576451117 0.705675510196655 0.536385570118069 -0.624199911349575 -0.00972648561006481 0.897648723235517 -0.162495614453542 -0.405358920879876 0.686135409541772 0.785239824828198 0.810659683997464 0.632902697605263 0.889188546927166 0.916063000314692 0.863466991523248 0.862002683918205 0.654546118386882 0.608849304826284 0.7340494369576 0.451362795927693 0.146963422869361 -0.339713154811509 -0.260752926195889 -0.476979605912314 0.943789492370463 0.911480491543551 0.839931618081824 0.599111746637992 0.137090393435831 0.0623055223981489 0.320901329221635 0.175329825356265 -0.272102431837577 0.171104400504136 0.0785348648703606 0.295497158071094 0.257052687171616 0.533049093572912 0.630251919186092 -0.591491082935054 -0.838556513035691
-0.785812788286402 0.332706936852915 -0.877971097215924 -0.504721826050308 -0.300516483415053 -0.616774751588984 -0.647354907913142 0.335129055129066 -0.588349940182836 -0.506144000619894 -0.382607076333686 0.92974898519514 0.881891844520914 0.778055457093833 0.184390506330258 0.941781778471995 0.682480838064585 0.851660000925345 0.924219277441556 -0.985975932252751 -0.392932116407425 -0.882580392676516 0 -0.804065881955051 0.993575190899914 0.941225911978733 0.97124197415285 0.878127461489177 0.964012458432345 0.857484846737965 -0.454780168823644 -0.94763213269882 0.941035720045716 0.884630434535894 0.975182787179047 0.971049708250103 0.973031854155209 -0.953086389652118 -0.923665124812865 0.874877044680551 0.827665534550553 0.951514235513452 0.969555253160895 0.738884289995536 -0.0297103772520887 0.768087666596899 0.81405936294824 0.12564484900207 -0.719326230500722 -0.625957955917462 -0.617047657079727 -0.604140988521127 0.175929401503671 0.282921858469052 0.694545155958432 0.787044187528449 0.91862166936292 -0.48892813166991 -0.305741639553845 0.908435334313104 0.923226967262203 0.378903634389625 0.848888512557289 0.904862376740218 0.88652577605758 0.829792945824136 0.909329530594772 0.797484985645369 -0.520041973632516 -0.437605955108492 -0.949913019185569 -0.968782444364883 -0.958763228732746 -0.66830286547803 -0.898651670490952 -0.346036434415224 0.986756186216322 0.993767050509935 0.994875099414683 0.987687054727078 0.992918507747795 0.994362789863105 0.992786250112542 0.978399735782154 0.99391492339436 0.993166413192419 0.983066356878884 0.988272946404563 0.983413305303976 0.943898552995207 0.954918182052465 0.956479044440442 0.976001098411349 0.961765363150942 0.951506015447217 0.9556493311198 0.952825963602342 0.940963725546808 0.934408187058895 0.935317157539276 0.915923404301859 0.723160220230296 0.600435884136896 -0.0556086700348948 -0.176785682693387 0.627150499371978 -0.0344216515577655 -0.745553832611581 0.316550916619768 -0.389813821476617 -0.757486266105598 -0.761097394749005 -0.0173165917816947 -0.823470246255492 -0.922211246529912 -0.6525140519897 0.143977928986869 -0.931529864667604 -0.93128530244644 -0.351293660573949 -0.318833348027477 0.552855444262717 0.478720082990902 -0.8664683486319 0.735219039714719 -0.857732301816097 -0.940192572208703 -0.753591008682062 0.988581161543805 0.988664737175881 -0.975679645561072 -0.245508013434414 -0.30698167246456 -0.100836350139433 -0.369958241181469 -0.485549374484761 -0.699573677522879 -0.495725710279907 0.692428127854612 0.760980375721797 0.00179186888007896 -0.369657260371828 0.539173557448096 0.0828155837956383 0.149917982768233 0.157862252270272 -0.353460214815376 0.767785841387127 0.89119859156291 0.864634624799141 0.795895632076397 0.852307118576146 0.839782623267617 0.845771061414909 0.836596823908829 0.848995203873125 0.834330483536555 0.914486749924579 0.91654417988459 0.956498915150762 0.969602199839084 0.986134637416513 0.984323189670546 0.961822707317439 0.176215939845229 -0.39683038320923 -0.908309770525941 -0.627983814950676 0.986078106138092 -0.727210149663332 0.990206640983263 0.991230836824045 0.643455014051086 -0.630300273000831 0.916427681151239 0.879781432448077 0.730582817095207 0.47778129133195 0.0476964941377723 0.00287842952834474 0.13455090312193 -0.891839975308374 -0.947197710403718 -0.942358664390379 -0.953052691143177 -0.886000162376231 -0.875921996255103 -0.966826521790763 -0.956561102283963 -0.88722699875834 -0.963561499236812 -0.970750588113367 -0.948308679860861 -0.917939899909972 -0.952553840752117 -0.949314305345905 -0.874922255581034 -0.947951424564985 -0.960687301850923 -0.949936458301146 -0.908491681357899 -0.919702211591718 -0.92979380274128 -0.500185726394596 -0.729419692636466 0.210900347227117 0.952748155973571 0.977463613999789 0.98306232449819 0.99527648795661 0.992856586639363 0.993340245660937 0.995609027854369 0.992841206328092 0.992764703610179 0.995186967308587 0.993627116365493 0.988176040826976 0.991390310600911 0.983639897898926 0.830725271776441 0.670701587902942 0.761489002060349 -0.94662482654003 -0.989999483369945 -0.991064522354732 -0.727359130473826 -0.943449565126155 -0.988704943631883 0.901797931064528 0.98876505605563 0.928132110796699 0.64129231724671 0.976398927993769 0.983693397900971 0.975804673199689 0.792836020121654 0.953255630604057 -0.982125507774566 -0.908638853109955 0.984582940642563 -0.890812292771169 0.983120899869801 0.976351248148398 -0.84959883421299 0.0659890734366227 0.733600879113223 0.719796132044991 0.60446350792347 -0.508120343219417 -0.0440910088816491 0.880791685659222 -0.0868355058825976 -0.328051058809169 0.636964791857897 0.755465193610565 0.728136654949441 0.372844881673746 0.871075181909799 0.807990328293479 0.487767381675278 0.423600535709859 -0.503477892262442 -0.675625472181288 -0.1069420407925 -0.373264745009875 -0.721349650981143 -0.772596152717748 -0.798996408173757 -0.880279055227253 0.849473768008331 0.684900528932376 0.749458774508306 0.217121304121955 -0.00609913662081488 0.105176140296838 0.243318455295932 0.0988762660174905 -0.00963568135936267 0.284930063621307 0.163381019531416 0.372707813291729 0.346677193141518 0.56147615992456 0.665535400135127 -0.410502873841717 -0.792918249253533
-0.919974870915636 -0.686497785722662 -0.950069896708481 -0.87812838829799 -0.871104735568899 -0.913323443322679 -0.895206840683401 -0.699232420782745 -0.921695223397361 -0.889199302822185 -0.854529033573709 0.758758504937341 0.386216734758377 -0.680922533081826 -0.94373900072891 0.618485422801914 -0.888167350980346 -0.824405883777248 0.817046893077006 -0.924405452303153 0.552252066872397 -0.86440196918589 -0.804065881955051 0 -0.846204196927231 -0.973027716224052 0.891384137075361 -0.0905263463510192 0.924388736662608 0.465082131109815 -0.854170117740435 -0.975888762842225 0.832127303069411 0.488688580594083 0.920052265812757 0.969313724833169 0.960598754352612 -0.977977246852225 -0.955912821823759 0.754865922378177 0.771757764280844 0.93141075303131 0.955936960623377 0.549625898348921 -0.28422100857444 0.522138455826831 0.458082633537538 -0.444917125985906 -0.802431887697413 -0.820498963554658 -0.833224655862129 -0.907472366639849 -0.801551536774886 -0.44468008981495 -0.130622775417136 0.38962418287221 0.843574089070536 -0.728302544612883 -0.673729999004118 0.83134586789025 0.83472211533225 -0.160787444772661 0.768659114255515 0.832388521537273 0.822212200991427 0.755049528094262 0.872922734283131 0.610723623041549 -0.703155075354307 -0.666045991969486 -0.965532776188556 -0.968176651056044 -0.952912002024603 -0.267994348423885 -0.833298109126615 0.581369663151293 0.990870410041841 0.994658385766851 0.995385537125156 0.990200085406996 0.993719456341684 0.994931907457034 0.993914419986361 0.982779052268801 0.994382699823718 0.993507193267 0.983294631280508 0.989203251701734 0.985203913249236 0.950764491909167 0.96011811995199 0.960467127330102 0.980142387057306 0.969550849888916 0.960994671822701 0.966066062919951 0.966818898843096 0.958921767168432 0.957939263482239 0.958803374473996 0.946847037906198 0.838411120729341 0.834940496801094 0.346756629578766 0.20444304151931 0.854773068303194 0.657901777377861 -0.271252287976712 0.620784295356863 0.201779892263781 -0.525101878849015 -0.506921956023771 0.348756171652919 -0.685889861415544 -0.879929410436799 -0.515738375779479 0.360730514629593 -0.914953422870504 -0.919253098483998 -0.355771791234815 -0.344420933733552 0.5501020538161 0.497729144047943 -0.799025500035478 0.67621738065362 -0.875230684105524 -0.950419868557411 -0.822387927723332 0.988196244429099 0.988862326873976 -0.982749747355502 -0.15479957209461 -0.190417480865472 -0.0352021283947839 -0.445921783555219 -0.52429532468329 -0.728436194716434 -0.559226250146393 0.653218696555302 0.715912381522437 -0.196563505446851 -0.385927615418758 0.577595490684215 0.10294937429307 0.151892547159302 0.201647784309312 -0.588878262347982 0.762792522149745 0.896725382091397 0.847878559614145 0.762029933596685 0.830952035699568 0.822159219448991 0.830122044884915 0.829693363265025 0.827737418031535 0.789644556879888 0.907416465530269 0.911978970185379 0.960775842126418 0.968953781275578 0.987947814621859 0.987352485527803 0.972113311717622 0.544160785583694 0.0340096539518388 -0.90491928813071 -0.355521850737417 0.990247593102502 -0.691105257631609 0.990875338159837 0.992068172941948 0.858937788886068 -0.612043893172305 0.901774265327676 0.881821488094991 0.745407175446924 0.397253763763009 -0.137991562799853 0.0358271198341026 0.108939438393471 -0.901475717253963 -0.94383571973162 -0.932758061891514 -0.951140025191701 -0.883157150302461 -0.875615970569841 -0.96397522130587 -0.954228396064243 -0.892651941629828 -0.961437375836585 -0.969272679789461 -0.946867673168069 -0.919848472462658 -0.950997110403491 -0.947058512011697 -0.886254233206458 -0.948254838865315 -0.959372950119245 -0.950016019421916 -0.913310205654196 -0.918076808406241 -0.925926937066506 -0.529456893241081 -0.75263640838 0.107264815472438 0.953131581875289 0.978156304545556 0.984133875758393 0.995678961587484 0.99369832418216 0.993665757226003 0.995651584197884 0.99369779881885 0.993755196162874 0.995288711556895 0.993636270911723 0.989619267829616 0.991729173748892 0.978539819995117 0.802552779355346 0.65528465806382 0.0342697189093436 -0.97095978073837 -0.990548761500861 -0.992014549126364 -0.912420743494204 -0.962403786852982 -0.98888860075385 0.835639413123706 0.981959883538166 0.819567717880561 0.53237715263365 0.960126865974858 0.96586293950271 0.959529532214673 0.449013634261787 0.891470122209616 -0.985557210376776 -0.926964755244696 0.977360563568201 -0.969310026977685 0.968950986342688 0.95681169682347 -0.95447349827893 -0.817600990853119 -0.37422518857756 -0.45449381117327 -0.63183364123492 -0.890214227475711 -0.806259994509054 0.409026638865671 -0.801756180452189 -0.827926169604558 -0.430184828436196 0.144090544031424 -0.129748152196704 -0.798399096370168 0.232130716947833 0.526580839111986 -0.537655541693471 -0.547854791249261 -0.673217103727813 -0.791283278780788 -0.58665293493549 -0.579742867816951 -0.709353986971742 -0.776261117957273 -0.830333744844479 -0.862323686723069 0.917262716200386 0.822432646177998 0.7699978951218 0.410993253837365 0.0253737484904143 0.155384545599651 0.395824152262445 0.287502671613237 -0.0391587943817547 0.40621942398258 0.292440904482673 0.488159818792581 0.437994352982533 0.615117864232333 0.744034981101256 -0.365733588095475 -0.812456764815831
-0.93289322670251 -0.821672057180865 -0.957520419532053 -0.861673379829177 -0.871285569276981 -0.942652410889456 -0.900972983188134 -0.452557122409812 -0.939242225177127 -0.940417305306431 -0.830995868494943 0.858778873922689 0.200917400578412 -0.676364409110621 -0.790762215257531 0.890294301149997 -0.910674694226654 0.08765569116363 0.947303647004563 -0.842520177457485 0.922290070123336 0.972836109583778 0.993575190899914 -0.846204196927231 0 -0.959075603152735 -0.935187794196745 -0.991981020652417 -0.694774236973461 -0.906382548783664 -0.987451817457121 -0.990269002468746 0.466940668332161 -0.0548807948077269 0.448910623312049 0.861540143619105 0.871201871809865 -0.978580055912511 -0.962308497555445 -0.0564109556401864 -0.348185477057205 0.671997454551128 0.883916155768741 -0.158518011439727 -0.850907166163471 -0.528102792379978 0.0108699550579828 -0.58694992602046 -0.877075888209725 -0.858908706413313 -0.723023104333636 -0.807691294192832 -0.262621393378294 0.785999247278284 0.620238743386903 0.755581826176577 0.937784873706574 0.263739021100193 0.0228947107543864 0.894675412617412 0.94436584792105 0.685025775871824 0.888854293003624 0.903974496009078 0.926433553728815 0.901763486710867 0.931614806443233 0.81118217528931 -0.419735214758261 -0.741545076565237 -0.971638370971424 -0.972481762316184 -0.967566272757444 -0.692263509378158 -0.927256475286564 -0.473788427059655 0.989828733588569 0.994817385842806 0.995604779242546 0.990528883567973 0.994297075897306 0.99547353327039 0.994654688438361 0.987332435121641 0.995163776280149 0.994398301103941 0.986898884851461 0.991647015846386 0.989102756276727 0.972259849198776 0.974846678556327 0.974882676020621 0.986854357395488 0.980686602882419 0.976058214402863 0.979766988828982 0.980216262199496 0.97570532743426 0.976312405806267 0.97625870995638 0.968868904613391 0.929462703631034 0.936442765498347 0.779636166513257 0.682136479884572 0.916863843490263 0.774827976428826 0.129393558560503 0.766363741319234 0.250612918087953 -0.593779197500614 -0.583777783420877 -0.0079557633536306 -0.874152262305598 -0.931338239242817 -0.734979498345181 -0.389312565598724 -0.953270176343699 -0.945201925304094 -0.645307511496007 -0.687607464139506 0.159642402820648 0.044101849152329 -0.928917371305014 0.599230516175363 -0.897905631165852 -0.951772786856645 -0.856610981189095 0.98751067793386 0.987439032571071 -0.982014140936583 -0.540358113531694 -0.545667160350052 -0.250681711834457 -0.558315546708079 -0.655073795644769 -0.754577624166599 -0.542028234513254 0.68287511047341 0.775390538697527 0.104631502546235 -0.0760428533449358 0.729311587163534 0.541083290628125 0.539570734056717 0.562817181723744 -0.0869463377948334 0.871146054131751 0.927220137369026 0.905781411118519 0.881260738354407 0.895745328254634 0.888528715412601 0.90567253691362 0.91080434687406 0.895621249182369 0.873469530405795 0.938233611806887 0.943575094587345 0.972879790721973 0.976291964423929 0.99056214315139 0.990056638906939 0.979352117329279 0.815870886824594 0.738565406233487 -0.874722040290074 0.552883160366603 0.991554747156926 0.294681958105616 0.992205937264603 0.9923532773816 0.912725920832786 0.211743960129964 0.936177928043601 0.923714895260037 0.861117044878287 0.696400609144075 0.356914556644086 0.558947147756467 0.540287348122283 -0.859437214245736 -0.928189890372154 -0.911662088572286 -0.937186241510594 -0.850265843133976 -0.875913485130351 -0.964389776987461 -0.951244571188083 -0.882335598694409 -0.964028529415519 -0.969846684712463 -0.944721003115344 -0.918683520467662 -0.951778420835348 -0.94575608690005 -0.853411711183128 -0.943993156805678 -0.955103539856941 -0.94171452669455 -0.892958843582392 -0.898976204659498 -0.909758845496956 -0.292055147055944 -0.579134846517606 0.702618394221392 0.971115375939288 0.98482936262182 0.989900940382705 0.997077331510144 0.99677016285331 0.996451284833431 0.997534580036027 0.997198995166712 0.996967648655971 0.997716723626371 0.997082435118192 0.995008594989258 0.996215737668278 0.994185284721985 0.961098810492062 0.932032726394188 0.92318726965741 -0.956594732631752 -0.99113090601072 -0.993028953370087 -0.957129120130302 -0.959660066664697 -0.989714795108253 0.86537612094713 0.986099417565084 0.951925578255891 0.803307024893231 0.95643411453863 0.967935348916264 0.965398193997549 0.410070972552399 0.798905284617848 -0.984911155155235 -0.95330213799672 0.962776053070767 -0.970667903973812 0.970809709740572 0.964654082189871 -0.95614303942552 -0.891156447971073 -0.591544170841367 -0.517259935124988 -0.809726121780236 -0.937862197006716 -0.821486786013247 0.362428526128572 -0.89818378579603 -0.910515839042559 -0.353991205627717 -0.0407159718902756 -0.560913513846369 -0.831900649802549 0.270009485203015 0.708308383044601 -0.352668905905016 -0.257909217038844 -0.197095469014832 -0.634684346965239 -0.260426819719651 -0.69452918235065 -0.809159200880655 -0.876844859249085 -0.889024083045479 -0.912438706159196 0.875163812894294 0.710525161077169 0.346242485113967 -0.422292370246066 -0.718466345297317 -0.730003428720922 -0.408119421317625 -0.563104593944603 -0.722695335324697 -0.319075453261739 -0.445455807752642 -0.139010737597617 0.0178494166357068 0.42353766908364 0.47452054909529 -0.775047822162481 -0.893091255987137
-0.852889765893419 -0.433505158340736 -0.930227942590203 -0.65405351345809 -0.536222304076476 -0.871720133352787 -0.830372316501132 0.188114963670213 -0.816511679265958 -0.90012977275923 -0.705916119886945 0.897969777071797 0.637430839080104 -0.286894955432792 -0.213308219990544 0.919801791803174 -0.859291262612627 -0.269732299673001 0.862101938020885 -0.972074336626752 -0.816546757809968 -0.0952945372884389 0.941225911978733 -0.973027716224052 -0.959075603152735 0 -0.983433559411521 -0.990339873696473 0.485428701581741 -0.184123890095174 -0.980327504704349 -0.985167453904776 0.91278567216946 0.825711887299277 0.955212479673705 0.929755613168288 0.957745604550446 -0.954913177377618 -0.926599021174287 0.833839552364465 0.689097603019331 0.916855753618666 0.955140605475578 0.538721806881154 -0.479647412596734 0.150331814315959 0.43698360554884 -0.513239716072126 -0.822914743490151 -0.803116317483594 -0.686899042610357 -0.655971853971503 -0.170904923296488 0.65455340802618 0.503337517755475 0.608074367427586 0.91895355861175 0.352116368102501 -0.165252522975798 0.851047773151309 0.946135206771659 0.729434606960089 0.819934447190178 0.879286146973988 0.923233357950474 0.871689388127198 0.902104343850792 0.828377780981893 -0.278334341298477 -0.747265665371904 -0.957292140594543 -0.974172747776435 -0.974150005410568 -0.906385598957809 -0.960503269682247 -0.92227614793892 0.971717359654022 0.992222419555684 0.994227883044141 0.981657110955811 0.992251604609412 0.994174845315674 0.992375622178519 0.977458896444761 0.994212829707349 0.993626370011939 0.985067031631723 0.990614623173043 0.98595500121985 0.957226922073582 0.964250195660153 0.966209738806266 0.980488009925977 0.967710188788363 0.961578744256981 0.966217448247443 0.962495984077299 0.95411996013844 0.954445335854296 0.952650812326346 0.935904322067743 0.854922317250526 0.846519407280816 0.550550787707909 0.460874814163139 0.789472378665517 0.338043040404947 -0.192836462411832 0.706563639926394 0.28224411132182 -0.51899009867529 -0.441730096806906 0.221420047606261 -0.822184334137468 -0.900749736790747 -0.483716793555732 -0.0629737791968405 -0.932902410362716 -0.907991495405315 -0.134383734694795 -0.249925627087011 0.563995355650933 0.486334827751511 -0.907897716422077 0.743261557835468 -0.86419353657885 -0.941409775089004 -0.709980842433202 0.986698858823386 0.987317564010746 -0.973403878403456 -0.576607606509899 -0.531239795248262 -0.13155259745981 -0.381162311097288 -0.535810085614501 -0.679108677937928 -0.439088808555162 0.684890850606121 0.800692433586686 0.32609902670745 0.0351191296922449 0.684669746820681 0.425108174904432 0.465252676868182 0.450421879925468 0.041595401995268 0.82989290676498 0.91497800737519 0.897358431766563 0.864330780453801 0.880756807186892 0.874365219474345 0.883309664539422 0.876304713012794 0.865960578391567 0.845347215191301 0.914683281052288 0.920438718453887 0.95801052019859 0.971696516803575 0.986782487677691 0.984299893042128 0.958553440251568 0.361890708228568 0.251031108146604 -0.910053860985335 0.0750438570662495 0.986679195898428 0.238878846865462 0.990898379299559 0.990512782500092 0.77690513698521 0.283417910107184 0.931112079032635 0.897281700470906 0.814218786042932 0.686826503527789 0.465548512279112 0.568318580565416 0.534025586907083 -0.809635137731614 -0.903947066475744 -0.893217794333799 -0.915079044767079 -0.761970297231302 -0.843219756936889 -0.959901856707008 -0.935317175786913 -0.815975597884224 -0.95778603769831 -0.964161151885654 -0.917182731132636 -0.880823130902277 -0.939578617586049 -0.923761404635823 -0.701943016954749 -0.920748529968392 -0.940789309710818 -0.911030690609369 -0.820291121454801 -0.846135782407094 -0.85292763224554 0.200295371098802 -0.129624936777129 0.847665650728878 0.976063547348066 0.985122452468509 0.989446648237827 0.996931418667952 0.996920133498628 0.996764927532282 0.99766458609006 0.997423774961587 0.997111586915595 0.997800576013453 0.997320319801546 0.995321655296368 0.996007415890032 0.994293563261994 0.968012014379376 0.930473339622934 0.902602283691943 -0.951645869054767 -0.990907477702597 -0.993002834315052 -0.960423271789772 -0.954698965971774 -0.989587285088613 0.863756594964715 0.987518203469688 0.963120834533656 0.79285679747792 0.957622241002859 0.973469308255139 0.96784963780994 0.446631134427039 0.80463430386463 -0.982690348593071 -0.957321054497962 0.96065674540843 -0.947869702279382 0.977286043202491 0.97152074151799 -0.922255132613521 -0.795558545382022 -0.190402471496066 0.101617576846584 -0.537090431351366 -0.91407541076159 -0.718730206937054 0.678796401753511 -0.84786489100451 -0.895642835032571 -0.189125010776754 0.250817915703712 -0.434095930663494 -0.766510100319361 0.448522903746812 0.641782810679924 -0.268333612131948 -0.197000713424477 -0.66566128137264 -0.788323251479212 -0.355324816382896 -0.76142182139787 -0.875128783165036 -0.883225336219072 -0.895481896455027 -0.941405872915471 0.685296490651735 0.107937706083553 0.507645404504222 -0.349819624177428 -0.524209197386671 -0.540573421181302 -0.302646834848429 -0.474548459781098 -0.579195269588706 -0.341713539905979 -0.419064840263391 -0.114451124265053 0.0273277214531584 0.423665098631354 0.335140750017573 -0.773157972514764 -0.888224479588813
-0.624683826489457 0.498105501592221 -0.856824151669616 -0.0971747576792811 0.125944692862221 -0.561110556689052 -0.475079463314777 0.704829838616264 -0.269317806530912 -0.44031966331567 0.105545234644916 0.953443500109865 0.885222291983861 0.658396054136468 0.677810177513704 0.954191897362883 0.419680683879884 0.809451248285229 0.95530896484047 -0.478712988980992 0.870996783249129 0.872294476047286 0.97124197415285 0.891384137075361 -0.935187794196745 -0.983433559411521 0 -0.885539004039591 -0.883368955947504 -0.894535245540668 -0.98714747246642 -0.991125151993243 -0.0451864444883397 -0.318598547920497 0.957935399903565 0.962024555574256 0.971428191955733 -0.979681537802101 -0.954036945461521 0.879513416305314 0.84953349419672 0.94259634072815 0.960955891911079 0.356537459143315 -0.436486718685154 -0.0741856384741966 -0.413845717419713 -0.732323741557957 -0.830667517750954 -0.82015741903185 -0.77460309378797 -0.810141827956068 -0.511858039763228 0.553871277293519 0.299515318460549 0.571306806453406 0.922674632537001 0.149361208168395 -0.215314961947988 0.887027843737739 0.947550862822532 0.717133952763525 0.853795791496461 0.914635682566763 0.929006010578274 0.882838730427477 0.922953574768868 0.875299461768706 -0.0621087471061037 -0.446882227326764 -0.936982735494938 -0.964233242706899 -0.958917365492349 -0.713569980605441 -0.913827831909581 -0.639414866355345 0.983510700100857 0.99323674268727 0.994489863204801 0.984713637830506 0.992487443150717 0.994173309570232 0.992400615366958 0.977387147230669 0.994056486429872 0.993398723577106 0.984434430422504 0.989864130491874 0.984785751702219 0.953768884660678 0.961073054800733 0.962941123495857 0.979488214867793 0.966726429871502 0.958820240377908 0.964505733216573 0.963768135573949 0.954759834779158 0.954374015558955 0.956806562905748 0.944919076865769 0.865994255169738 0.874841369618439 0.633933001076343 0.56418549340477 0.859575960385238 0.675520687214267 0.27405872999616 0.793985348372958 0.641265294223543 -0.14456373205581 -0.029147378981208 0.569051615424344 -0.60595842789323 -0.834732022090656 -0.198580834501999 0.387822478414393 -0.906003549512324 -0.885587809768052 0.0449363042188709 -0.0476124699045184 0.671976327490426 0.628470087394332 -0.813792374528374 0.687438567002303 -0.888754470307067 -0.959745239125759 -0.778037207911361 0.985841183478088 0.988406418378717 -0.983351204947209 -0.622890894343858 -0.491999421094467 -0.0590451270251771 -0.458866814612827 -0.581365860893122 -0.707711691675377 -0.519776456351746 0.636188890608029 0.771740446879986 0.186685348567871 -0.0114078838679181 0.674800546089945 0.379794210395765 0.408868898971116 0.406446350544251 -0.193009480980621 0.817661661077255 0.911974283321724 0.88836915664349 0.849887286030384 0.869454761390099 0.862443101148627 0.873751028430006 0.869103084341548 0.855006403276257 0.829372676801435 0.912111343457371 0.919998453202328 0.958502169982357 0.971736214964797 0.986940435982942 0.98501899777077 0.963497891819576 0.498616771640442 0.307364137410802 -0.901359580598246 0.0877327160180933 0.989098035696785 0.0359436144920012 0.991248168376906 0.991306693016996 0.856602441305621 0.121944506590204 0.925310075102183 0.899451723660523 0.82038226272021 0.637106109241012 0.31829465122711 0.525110889253853 0.473111350321561 -0.856668392685413 -0.915714112968153 -0.899742046481739 -0.931130490844515 -0.805626513172548 -0.861518175105877 -0.960022645294811 -0.941967580635186 -0.857201604980805 -0.958367900985965 -0.965143617101634 -0.926224312657631 -0.899535087492909 -0.94257036537036 -0.927913342111626 -0.805511610987412 -0.93200551092196 -0.944907233154582 -0.924742054307282 -0.865841012160548 -0.871969988779308 -0.863457180991922 -0.0241924880655605 -0.382416541606455 0.691185838312029 0.967566981120231 0.980215427477123 0.985193118438623 0.996174802445011 0.995959065497494 0.995829468509387 0.99684323433599 0.996310480436459 0.996093738087373 0.996707406962969 0.995833253627517 0.993466026358268 0.993417440372361 0.984307916305913 0.915109870303981 0.807404034253231 -0.484654144517136 -0.979257022650901 -0.991512235017651 -0.993410126895002 -0.971117750817888 -0.968846287084851 -0.989796429816206 0.818173089678442 0.981666093086847 0.905221881099045 0.697323090615062 0.951557044433983 0.959878862333276 0.958155258644403 0.348353552157385 0.82806177639869 -0.984588941235754 -0.94681378139824 0.970648636034744 -0.962369519201225 0.97590162033367 0.969615861434835 -0.937535781535843 -0.788919785068257 -0.114768919890344 0.110662453404956 -0.472231395596218 -0.897704214053972 -0.699967776421429 0.698539830739006 -0.812041144859726 -0.866386506606675 -0.00545383564357347 0.400232979702398 -0.31046189223523 -0.814408646932739 0.6025672595844 0.662064982693332 -0.667146234696412 -0.573773547226638 -0.606989787570742 -0.863044216654589 -0.791381320350232 -0.846840921102803 -0.89264382751302 -0.894262484998343 -0.932800329528035 -0.957409769318497 -0.355300873853851 -0.602028358483964 0.0794929689575233 -0.534852422331903 -0.666912100058142 -0.615856478236353 -0.318222124385932 -0.50980633978471 -0.535079604662607 -0.259656167118719 -0.327452493387607 -0.0649511630447939 0.0629289426892681 0.46699729253755 0.46883312391008 -0.703411220843281 -0.875216069749672
-0.951705015805371 -0.902613416330496 -0.971707183785582 -0.937370582186644 -0.9294725265505 -0.961734734125284 -0.953168911935157 -0.852443902556046 -0.955881911686449 -0.958894432918254 -0.93849261439741 0.378533869816032 -0.613809476812502 -0.935763670653086 -0.959364379719045 0.229299362021245 -0.958295919890365 -0.953048781298721 0.502726091185589 -0.906959005959333 -0.734447821844751 -0.840096917695186 0.878127461489177 -0.0905263463510192 -0.991981020652417 -0.990339873696473 -0.885539004039591 0 -0.844767639198543 0.927751017413873 -0.346681048850927 -0.988138754478655 0.55266298120812 -0.175553943125241 0.899216532343331 0.971106936798461 0.968324371785887 -0.983515360228451 -0.962953398838936 0.847579765873858 0.863231389716005 0.946207334515988 0.961346828698454 0.313254600313211 -0.471460322123616 -0.314594441580699 -0.671671362827396 -0.827459715673219 -0.879537452249921 -0.891579096621285 -0.872477419202596 -0.925226942273227 -0.889125774737624 -0.326606720861549 -0.773415232803245 -0.655886963820001 0.677950027998999 -0.61371281358515 -0.820911866773803 0.221809649240779 0.835460011620272 -0.0992119416968672 0.355068081676615 0.569892088119202 0.829163459675045 0.679664072820127 0.74922503082741 0.466173123968135 -0.732790008349627 -0.882573159090433 -0.972990759510526 -0.976413229273154 -0.972014027754408 -0.83697247477338 -0.947411566101323 -0.769623805887386 0.986157139904952 0.993971144760597 0.995029896351866 0.98663399534562 0.993190275006727 0.994758040704457 0.993495663234184 0.979430092252854 0.994454232781694 0.993600628296316 0.983068517101949 0.990456414192514 0.985748048404037 0.948942452877547 0.958751140528798 0.960778872372058 0.980353474986089 0.965839000757994 0.958439781893704 0.965556178184165 0.963249143427232 0.953412116485948 0.957726829146762 0.955419338089688 0.937979368637984 0.851974544663576 0.884259559842947 0.57958813713871 0.493168515168987 0.846932757370635 0.627541863179431 0.295522695142988 0.748474176517524 0.669081770475437 -0.164511014966805 -0.000507416329839713 0.590420816006293 -0.532681775556138 -0.817201323687866 -0.182103432548956 0.444531164066916 -0.899530620294075 -0.879557317230049 0.0501911704765079 -0.0111300905757964 0.692849227558419 0.648298420103488 -0.791274872801086 0.70034894320278 -0.885027522704369 -0.959350095618176 -0.793513642483328 0.986169579137082 0.988584937890927 -0.985614158475181 -0.52648047590185 -0.320081146703385 0.0555473566508956 -0.512976663232462 -0.621306089099195 -0.724940144962717 -0.600422156073946 0.455810829792016 0.631518987443021 -0.157225937889789 -0.16557212271816 0.5525210452029 0.0942307777909112 0.214684656595821 0.212368879575533 -0.625526944385586 0.717830333732903 0.900272021791602 0.841848006951996 0.752434399881981 0.796040846135871 0.801522240882592 0.798504331396971 0.782231516586249 0.747811313473489 0.652948948023384 0.843937628394668 0.859912313207139 0.945737482914015 0.963798196578426 0.986794383271709 0.98534136594875 0.958834223871891 0.24255542361605 0.138642530424764 -0.939444840454026 -0.0198418297094149 0.990075829569197 -0.202041505680593 0.990865953467734 0.991006274191389 0.876202850123842 -0.159579063995622 0.878095589462806 0.837628442841762 0.691878677291963 0.318992848465659 -0.123928291838666 0.266528751403142 0.098384127022848 -0.898171081310089 -0.92510812740288 -0.907896534877859 -0.9388697170085 -0.838486737050951 -0.88740937936275 -0.961033218639064 -0.943591447023101 -0.870126974312393 -0.958869700967545 -0.964501174352415 -0.923209845517291 -0.896462859118136 -0.938809399201496 -0.919579118994222 -0.763412658090729 -0.920683267141051 -0.934437746066243 -0.907602937810288 -0.822888588950058 -0.817978419666097 -0.80496323728576 0.264852855800667 -0.0582439364768898 0.845759717274304 0.976861037709527 0.985222127301408 0.989441923293009 0.996999014888179 0.997215140942253 0.996966310912229 0.997609524785653 0.997589282479624 0.997480058061216 0.997769111600457 0.997155126827934 0.995713581961064 0.995607200702903 0.989626578719753 0.950322972766066 0.892462771292578 -0.635934648678434 -0.983397345045892 -0.992054942632249 -0.993882268872177 -0.983963594834997 -0.977786750865877 -0.99093031770804 0.438592943467148 0.967098493934651 0.814760112916705 0.381487583644679 0.833305307751825 0.83916445748563 0.901366170701291 -0.720887570664366 -0.523629437309227 -0.988534195845916 -0.9717935992975 0.856534231234484 -0.984616544459167 0.894559862443905 0.863127090096714 -0.978194226381713 -0.961570819970593 -0.933062785859335 -0.919216259622156 -0.948069212973405 -0.971899381339419 -0.952277112906266 -0.824950577828035 -0.960036266317104 -0.965528091011158 -0.920330549912645 -0.816104387985877 -0.921023175113521 -0.964606008504258 -0.844887958158523 -0.783077021974322 -0.953094629252178 -0.929798719586366 -0.881169974306155 -0.933580270172828 -0.909177905310662 -0.928579941272589 -0.898278288157535 -0.897958300736307 -0.933211000027297 -0.936822992001123 0.918648632572976 0.668147205659551 0.79477800581236 0.499201844316281 0.140181112658794 0.275632611283514 0.526556125117468 0.52357699327464 0.0118936588779183 0.486487909696633 0.400237820470027 0.661142134640542 0.679144158919982 0.775681432876313 0.801731386538303 -0.545735147799271 -0.877144105765382
-0.921341130469881 -0.81949502287971 -0.956374258189301 -0.850989476217197 -0.819973176554278 -0.936870370254117 -0.907940927583239 -0.412826014685608 -0.913505227347066 -0.940535967448468 -0.841625795028909 0.813159605514133 0.0672433478841627 -0.757946028199831 -0.6811306514242 0.873264935038577 -0.888648746858539 -0.551640080729002 0.836649385861313 -0.885176080157387 0.612090868172763 0.573775127047334 0.964012458432345 0.924388736662608 -0.694774236973461 0.485428701581741 -0.883368955947504 -0.844767639198543 0 -0.685003087205496 -0.975227554574329 -0.976872792578061 0.771155253524563 0.530599781150839 0.911640119778514 0.88455276822991 0.950614400246475 -0.967779971709559 -0.943042749786886 0.872697106646895 0.860863852633698 0.959096100446452 0.973176216304281 0.672310711367281 0.0245401037068492 0.351759117027067 -0.104260312563158 -0.631156471500447 -0.690888960633891 -0.615510674218596 -0.603458467723417 -0.71044923334115 -0.377906748743619 0.659613005113792 -0.146370709835337 0.134798417261583 0.878024966832514 0.425416382801681 -0.435533147217272 0.627023017182385 0.92391778568226 0.625783932329177 0.635005866421069 0.755040511806043 0.897309581237479 0.809361089995818 0.830281715146588 0.712023726694306 -0.482315231688171 -0.877963671270544 -0.968753198900351 -0.977065553610568 -0.978151324024465 -0.929838343106182 -0.969295011173535 -0.945683468983951 0.963907151972026 0.991491269572009 0.993803594000789 0.977427835709143 0.991828573927481 0.993892854644431 0.991983284817726 0.975362596090699 0.994118128609961 0.993438111522706 0.983779430155539 0.990993258005757 0.985645956660789 0.955103463022184 0.962966742091871 0.964928703685129 0.980603374772051 0.967323215793805 0.962575551657498 0.968186997587764 0.964491074770177 0.957433447349064 0.961468553780366 0.958797980170581 0.944287185958257 0.896622623106367 0.916234359740493 0.812131316771375 0.787893320785687 0.885550576832644 0.759205633425313 0.694940041422822 0.872630792398166 0.819975205264529 0.414774219759425 0.515448073858974 0.732458146007882 -0.439619985245685 -0.724468029904029 0.271945623770934 0.490694002018818 -0.887941626036128 -0.79920508650513 0.471568198068109 0.319017279428692 0.783455736080843 0.752988166306066 -0.87081788528649 0.798279086151551 -0.855623052112855 -0.945864148962728 -0.644685153195828 0.986561339008439 0.988579071635448 -0.978961162355189 -0.616042284227846 -0.432395974786019 0.130762584557926 -0.24805326768567 -0.391885152939794 -0.56910245828266 -0.331392046596557 0.715749149983216 0.822719128787719 0.481996346663743 0.389804172106832 0.762995726799112 0.577199377510771 0.592954406560566 0.579120938354851 0.0736686645947107 0.838818551468477 0.923578999205479 0.899918102722932 0.869189068381367 0.868989549291894 0.86780098254002 0.877534454927033 0.866935220457452 0.83136869080495 0.788513852133987 0.890753338898973 0.902937868002655 0.951957912807865 0.969023050298788 0.98636253944908 0.983883910734737 0.955515859520942 0.488962483175155 0.579334374282751 -0.912537004914712 0.56393173800783 0.988400444301665 0.694412326873393 0.990897697977218 0.98983359547404 0.882157979205458 0.681581345452937 0.926595381398901 0.896934472161056 0.850737897855998 0.751516007636757 0.605296475340655 0.771051481888016 0.716997845275282 -0.694646516459052 -0.803445561191663 -0.748376875038112 -0.829070460830905 -0.419217681939372 -0.743872805902343 -0.939718484634699 -0.875102517204806 -0.593938286244336 -0.936215303069169 -0.943137282690745 -0.80371026829344 -0.745365506654721 -0.88920903762523 -0.818336065283247 -0.00235586800694006 -0.819706368201305 -0.871537870329633 -0.763128887263066 -0.476815570697111 -0.521294939238322 -0.502347836457006 0.702758911365726 0.608516415528379 0.942399327403065 0.984258818359031 0.988401212912673 0.991967092686752 0.997405961673904 0.9979197681135 0.997734759452944 0.998255026250207 0.998453386155656 0.998283844119476 0.998538136182024 0.998322694423516 0.997444104206652 0.997288813171889 0.996172841318102 0.986808886230562 0.972172049305924 0.894884541899905 -0.961149410018289 -0.990973336565963 -0.993523456629922 -0.981404050127353 -0.964874958443232 -0.989719474026496 0.796310126562324 0.982419494878339 0.9631841999966 0.84665822955007 0.904392891807745 0.932278531617268 0.947171369681037 -0.314215376268598 -0.225681137983497 -0.985121022034381 -0.969504777197732 0.853595372789606 -0.976017470099199 0.951976272055394 0.944551759697207 -0.961340322491874 -0.938004385916045 -0.838919372950504 -0.749543113150224 -0.901503583755212 -0.960377803218336 -0.889257034643599 -0.244316087796726 -0.938830202812377 -0.944930250461228 -0.688642250791184 -0.454870756813206 -0.810155056443995 -0.900240263321613 -0.275279301996466 0.3901337124808 -0.74433990290859 -0.591576427541359 -0.0192854449817806 -0.519064156448457 -0.248205820288866 -0.622607732118473 -0.651551228565386 -0.750319871669734 -0.811141010182265 -0.777517224886171 0.881969189537574 0.765186424542009 0.832762660615571 0.426063839827188 -0.0298764767063801 -0.18565837630455 0.0916645871368546 -0.109636021201371 -0.600680605038041 -0.372624272442052 -0.462511624918998 -0.0115545357014568 0.190856215798131 0.571667737660159 0.212733771965295 -0.871895543940347 -0.927696827491525
-0.788525320742691 -0.200223731931161 -0.923375678936753 -0.54542070277836 -0.302772233030163 -0.840024006829265 -0.808161563322291 0.389069924803782 -0.693249390398158 -0.869279715494114 -0.620193746896728 0.916648013095482 0.724234118693156 -0.302712014881669 0.0303581580855865 0.923530631182383 -0.698710685828465 -0.241730866254427 0.867263400352446 -0.860320119950724 0.372633331595805 0.061924636875664 0.857484846737965 0.465082131109815 -0.906382548783664 -0.184123890095174 -0.894535245540668 0.927751017413873 -0.685003087205496 0 -0.877287695277231 -0.956912803361012 0.932259496813909 0.836722210901901 0.95337691477774 0.938571722523517 0.977036990478722 -0.924716282305904 -0.890314104493307 0.961696464107432 0.95047733829635 0.965450390360178 0.969685276715667 0.790522348823229 0.286833038809607 0.321896310036111 -0.124570731297522 -0.577142089744298 -0.681583772622516 -0.660146403295353 -0.601011990684327 -0.667941847670229 -0.362075740503411 0.63084402846026 0.0989036148845899 0.283822905933445 0.895717089228872 0.432252934065672 -0.314330528795236 0.758613984569334 0.937455045562264 0.714563799636774 0.712568550872128 0.838484389458008 0.910071376859208 0.832408563918388 0.863192674760998 0.816689024537489 -0.163483534456533 -0.769388823154846 -0.943176521918583 -0.971575518471614 -0.973907678994208 -0.924804272112429 -0.964515653484258 -0.945172925905941 0.933528181124698 0.988186997979209 0.991867676993796 0.96065804610234 0.989238691102455 0.992116739964978 0.988277671486698 0.961547427999833 0.993051740040686 0.992540213305465 0.982279263830284 0.989492469460866 0.981113489150625 0.940623936992855 0.953276142843051 0.955735955566787 0.974107173497215 0.95653375500494 0.950414811868247 0.955784975122499 0.950867780345772 0.942512539372927 0.945692215208994 0.944139232063501 0.925680355869137 0.857221058225825 0.87745893481748 0.730375328264629 0.717057658553937 0.844770773851038 0.676836699061453 0.622241734508553 0.857303628714908 0.806746926190609 0.40430724589778 0.542748043034244 0.756705915903431 -0.210345336828545 -0.603513666839301 0.451658202706183 0.638904108908104 -0.81408023112071 -0.664812274407688 0.65320934659875 0.599200136780058 0.837948114912022 0.815932699369437 -0.767407613128577 0.812702544284464 -0.841992151269323 -0.948198735993356 -0.434385958932018 0.984868030414757 0.988901718739971 -0.975532057698408 -0.612564915027327 -0.337421401677791 0.271798220364254 -0.0697074009078726 -0.238121575454261 -0.417045902992781 -0.216374850652469 0.692813591038072 0.808630293529346 0.524392341363371 0.407784199283697 0.736419281712835 0.531867669420961 0.558801046719669 0.537954978780725 0.136944629747785 0.817663064523581 0.915777036626375 0.89622996450673 0.862888251358441 0.863248722549193 0.861730834306836 0.868839803123211 0.852126549655041 0.822728234819855 0.790738521432787 0.88321280606683 0.895674535524949 0.943491390749417 0.966816596393627 0.98343341851657 0.979247491306384 0.940592576529931 0.212421573638839 0.297921745620487 -0.918620616768941 0.309123530403619 0.986192318107138 0.611941817992531 0.990299937153172 0.989047047314857 0.82358926018592 0.642759100973903 0.924798274036283 0.886612988817367 0.833656841214341 0.73952350119086 0.608058421313756 0.748170730041403 0.689000016502575 -0.688593345256459 -0.798607669073409 -0.768795334537454 -0.833337282403848 -0.388018857314303 -0.741539291246798 -0.93845140599765 -0.867641667161861 -0.580235731603286 -0.931872506281803 -0.938851598106538 -0.774497892035715 -0.731196945574821 -0.882434101478377 -0.793380266881184 -0.0232982471520523 -0.811358537678752 -0.863628236494184 -0.740680852777379 -0.466441303638174 -0.531317267520859 -0.444251670000375 0.709349672052674 0.630500093694213 0.929664433641778 0.980962426139616 0.98507403075759 0.988677297154217 0.996678462569643 0.997235477367883 0.997133537117983 0.997697205719508 0.997646682536435 0.997456452099097 0.997713132009153 0.997240234198505 0.995861113050071 0.995245765387988 0.991116551962908 0.971723266538833 0.936267232012487 0.324558892125743 -0.969642004844714 -0.99074438756718 -0.993421667641756 -0.981067260293016 -0.966666071626512 -0.989822402220854 0.788314761480305 0.982174259895124 0.953746516997624 0.8069715433573 0.924565977902244 0.944376872511161 0.951442393659574 -0.151477279996633 0.251897845457113 -0.984772158189583 -0.967830883954981 0.926026186151233 -0.969003082272533 0.970022517754423 0.964125938491838 -0.949956081314546 -0.906954187038936 -0.695291070492426 -0.438279085176933 -0.81458206158706 -0.950427527975984 -0.851041982799408 0.331235604253401 -0.916661663848496 -0.937975811480408 -0.559607790995141 -0.132604002964281 -0.758488344344123 -0.893154674449678 0.0720589562252879 0.435445533436819 -0.783243897603247 -0.643571716552774 -0.593866165558398 -0.826561751606155 -0.672149424448581 -0.817341299838595 -0.843155454714184 -0.829856501217464 -0.877806284527833 -0.891230250538626 -0.15723713712016 -0.398643117250087 0.446711500666762 -0.189625026883525 -0.293050230573069 -0.328980172022087 -0.195443107208856 -0.375275730908915 -0.474553402407253 -0.473519671473779 -0.499737623640596 -0.186801303202908 0.00787754967638741 0.445595264045248 -0.044807181926575 -0.848938691779486 -0.920663903770751
-0.920704218087873 -0.812750317763688 -0.963024941241794 -0.89523998299188 -0.864866972790769 -0.940449615264427 -0.934445530552475 -0.703727773133967 -0.92121655560102 -0.939333289284468 -0.907152605871939 0.63666201166058 -0.369416840444512 -0.899519353017052 -0.904375281839261 0.469444135187937 -0.931506143950177 -0.933134211489436 0.396921490509765 -0.91809375546323 -0.814393957887636 -0.891877946158865 -0.454780168823644 -0.854170117740435 -0.987451817457121 -0.980327504704349 -0.98714747246642 -0.346681048850927 -0.975227554574329 -0.877287695277231 0 -0.950407559007856 -0.297914767275982 -0.551416772850965 0.973630498590556 0.983390350632794 0.98864866706284 -0.967900597312584 -0.919326115219593 0.971682120474445 0.967162700695014 0.966756351635155 0.964432824869791 0.778789090172879 0.438700990597708 0.127526981877166 -0.454589610316811 -0.646925600369921 -0.738461372287325 -0.791217067493019 -0.722884306012093 -0.836841295171096 -0.790722081687338 0.21479253302554 -0.477369475573592 -0.416685115661701 0.781329907272888 -0.209389813853589 -0.688766823686698 0.459721735805076 0.893216635087228 0.401844436827044 0.504820009587699 0.703400265168953 0.866816933140752 0.751378120701302 0.794275736817839 0.671599243916172 -0.538087706680124 -0.841203164951676 -0.959988276364018 -0.974578666389673 -0.972697705800781 -0.896078746891054 -0.957159336148334 -0.902567605666759 0.970555742330416 0.991316288261656 0.993296138850637 0.97460343606758 0.990851832738607 0.993184864813796 0.990533540950403 0.967308377751831 0.993507049353653 0.992820917798995 0.982265036764981 0.989703923733223 0.982311035090801 0.94096610048419 0.954415076668426 0.956397044312631 0.976272919837462 0.960053224297797 0.953945388448912 0.959797743015797 0.956808355007827 0.949219393031269 0.953285081117111 0.950990647817505 0.935554886536786 0.874902423646853 0.898760337781372 0.725996384509248 0.7345837565673 0.880203222836158 0.744041497069364 0.679076494299929 0.867143035598278 0.85302904427376 0.472454261775003 0.637088298420854 0.824253863720521 0.266776055103197 -0.356974624239437 0.593065751390767 0.77567901872565 -0.661672027165744 -0.517968874545515 0.71368353253579 0.688986119048188 0.854093653598321 0.840017286227667 -0.435690806795679 0.792547287651926 -0.846892202681325 -0.955540876028072 -0.463768526399211 0.983975889025152 0.989513077375859 -0.979763392426912 -0.251346186259872 0.241901466496753 0.575978003721971 0.148366700576753 -0.0182100301710546 -0.237668142361382 -0.112449009528822 0.691838928833937 0.788680734333292 0.492279266536631 0.503353780688411 0.75567792423611 0.517146699277639 0.569251723420184 0.562735175586665 -0.133106348692709 0.804837981727232 0.917970803634317 0.888346339982245 0.840531307571201 0.844187284892053 0.848514560826188 0.852232002659432 0.830412408795842 0.793370459937299 0.740009925032948 0.865638268548254 0.878810133151504 0.943559034438515 0.965257369231411 0.9849077203226 0.982000976087859 0.948296970506466 0.143953644675963 0.194872924011945 -0.93783981654587 0.206775149780197 0.989041703525655 0.414864636095521 0.990604243272685 0.989945621087607 0.881706355404808 0.492061888301933 0.907003122067962 0.868587337901987 0.789307388897501 0.616688951381196 0.397880406265751 0.642904436296782 0.498384037478413 -0.796361276238089 -0.836571385785347 -0.810540119776801 -0.877486509246722 -0.558574126922028 -0.795565119431291 -0.938861371521753 -0.885940286587374 -0.706437031062164 -0.931206073697258 -0.938363126300743 -0.80658340726158 -0.780772355314237 -0.886902618112981 -0.805605970071986 -0.329525842868425 -0.832911885505723 -0.867302565008532 -0.775956073714208 -0.581587295818308 -0.592487110989961 -0.470189199261551 0.647448637734165 0.545362812210905 0.905009788694312 0.97715233215708 0.982537539541814 0.986297900016989 0.99620735400648 0.996818328708793 0.996683746086877 0.997120769335697 0.996920036806339 0.996843489010844 0.996787544138196 0.995752003910112 0.99413408916984 0.992216741147558 0.976227599404428 0.930440890354923 0.830104257755816 -0.836977236208954 -0.980673429810955 -0.990589731522925 -0.993411221334789 -0.98537933654141 -0.975658260867011 -0.989770397747224 0.319214189242571 0.957479496075172 0.810631465981017 0.42524723380915 0.774452650524591 0.768468229407886 0.883741892312424 -0.743341889161993 -0.637116594309383 -0.988347860197245 -0.973541147381151 0.814442418624408 -0.983684258086491 0.910082457471892 0.878487590682245 -0.976409066507415 -0.95915148238356 -0.925461028022952 -0.902639935728846 -0.942307110328597 -0.970073921507861 -0.946497422114663 -0.793410985558736 -0.95732448887445 -0.963235065867681 -0.905643512504959 -0.804531405814886 -0.91689915384437 -0.959548914006539 -0.813811099003402 -0.772655312750544 -0.948463229968835 -0.918678906868253 -0.880632598988184 -0.929199435944831 -0.914903224543776 -0.929191373032294 -0.913851602069837 -0.885328926388205 -0.92071049036488 -0.92113815473126 -0.745102785603647 -0.761749451871963 -0.0945158084731678 -0.374026010049904 -0.33874990019005 -0.350709257820697 -0.259362101716395 -0.292014117743935 -0.32199883260268 -0.402661262323358 -0.451510568925731 0.210337864154954 0.473128695288409 0.659781046787704 0.337618008474642 -0.814614698579612 -0.92577310240974
-0.972232489375118 -0.960736481112005 -0.981388296397791 -0.967011516603408 -0.964114846860049 -0.978948578325697 -0.974171751978308 -0.942133265377442 -0.977148743919388 -0.979282295518308 -0.969488829747511 -0.832661994442976 -0.933434769071526 -0.972438909419524 -0.974686788350832 -0.89775452697452 -0.982318438500902 -0.975514597238224 -0.88711372361899 -0.975345351021186 -0.966840451792567 -0.960759133447568 -0.94763213269882 -0.975888762842225 -0.990269002468746 -0.985167453904776 -0.991125151993243 -0.988138754478655 -0.976872792578061 -0.956912803361012 -0.950407559007856 0 -0.384382157621645 -0.443024265287886 0.904130259810247 0.966781323741462 0.985201795278483 -0.971126838513866 -0.926025492511008 0.975630972681911 0.972071664303463 0.966620045067027 0.959575096488297 0.754529559734567 0.242979130277943 -0.348732505106275 -0.732837157111872 -0.765465424392862 -0.828039646004803 -0.881064315454638 -0.823815067747358 -0.898208059460434 -0.899222025766085 -0.470691829134645 -0.827800316790368 -0.835210996752798 -0.0264411438673969 -0.644827446734714 -0.871367839963007 -0.699609789910429 0.61427820527106 -0.352838284936361 -0.476308935547252 -0.413960176838182 0.645725094082262 0.289346990065981 0.0932963514532554 -0.206721121871472 -0.8184173881518 -0.941958213121321 -0.977760882749337 -0.982046912590439 -0.981652058829221 -0.95053345955233 -0.975269616611467 -0.957206236526167 0.954140844407941 0.990603392085673 0.993254985396144 0.968763295016442 0.990814420336315 0.993353254525813 0.990825066673372 0.964320523100636 0.99374446340579 0.992891723871505 0.98033998172319 0.990309294341108 0.982443493293997 0.931896943703341 0.950300526373158 0.95246848302266 0.975451063396917 0.955162954168084 0.950931448627874 0.957318156158246 0.949516407327707 0.941883109523173 0.951243901418417 0.94011773421429 0.912837127756209 0.850703762066345 0.883990239946143 0.646369299522835 0.671701277137614 0.838797777780823 0.588801300356385 0.595739804450566 0.8317844075542 0.823619077213802 0.292619757020283 0.561158828405136 0.789231082924792 0.023568972323459 -0.480220089970871 0.528238439925947 0.714820933777476 -0.720270463973636 -0.514825262605298 0.7163972851153 0.693793289678836 0.851270918518292 0.832221883755371 -0.608972948859349 0.819830671945995 -0.82945800632593 -0.949970503020509 -0.351627076298789 0.984836937378685 0.989880521002536 -0.978593679630605 -0.202943860868556 0.352420294781793 0.653759473168791 0.18626446375204 -0.0418097365420203 -0.173057721462841 -0.102469732023903 0.596284878053515 0.70505996964245 0.402101730465483 0.515527181673869 0.710143278891363 0.401379026915714 0.523599733496131 0.512785065986582 -0.325511720528499 0.738108196844246 0.91203760707202 0.866867397321234 0.791880894724817 0.788233919143584 0.812440003296001 0.803410428924625 0.755844052784065 0.687886872104461 0.58036118708501 0.783868243225623 0.798399449188965 0.922241032531895 0.955668414092349 0.983516072014902 0.979813384895042 0.927406383190536 -0.212877410073296 0.056208326304932 -0.951558400320624 0.188433965963329 0.988303432587505 0.465610648007538 0.989856770120235 0.988387445651246 0.862584378722714 0.491291650994206 0.867987401394719 0.790834858424652 0.667304540795745 0.446200157725271 0.221121975903137 0.544780636335759 0.287174876384648 -0.810577456950528 -0.824446906510429 -0.801507994948504 -0.861943367932174 -0.543419757143684 -0.816502069278679 -0.934604231606679 -0.862512296100817 -0.662012792362312 -0.924765080000266 -0.925804332391053 -0.730166698823694 -0.722375727481039 -0.858925032903585 -0.715574153547399 0.099398556740264 -0.743677839720741 -0.796864485246623 -0.599730578995014 -0.224330695241687 -0.251089907387378 -0.0820569283726315 0.792672214622485 0.780740873882878 0.954097033912785 0.984422099411423 0.987299316115988 0.990457807108982 0.996953581818621 0.997762588862096 0.997659252013281 0.997982534476369 0.997977686046795 0.997947683198728 0.99795785819856 0.997197135126411 0.996016964236722 0.99485729907074 0.986633555048608 0.961391144553922 0.911969853175072 -0.720400819468379 -0.977145824021488 -0.990097070571762 -0.993358516462344 -0.988180441447973 -0.977942500705119 -0.990014792239123 -0.450096005726393 0.926412271983711 0.810217421639339 0.0769756691291866 -0.148558555572462 -0.0508754031493808 0.694850577815113 -0.905193385417183 -0.922768959321268 -0.988896203353502 -0.980329478670047 -0.604063351833365 -0.987376698939039 0.302077497146606 0.113857548506679 -0.982937246728777 -0.977685767825638 -0.966803162606378 -0.960368920717232 -0.97383291004582 -0.981447291173275 -0.969514609839004 -0.943043886852999 -0.976985034381774 -0.977249059440443 -0.956753982453961 -0.933478724534468 -0.96086729229454 -0.973016328393189 -0.936334613075107 -0.950330301595898 -0.971339011174963 -0.964533358371334 -0.955456187908691 -0.950651048749859 -0.934380699135526 -0.96006581810316 -0.939834819441485 -0.907436160791345 -0.92281124381036 -0.917456739533503 -0.747845839442851 -0.801074426222755 -0.176610327136318 -0.177996089808266 -0.0465555216144426 -0.280379720970224 -0.24711806159643 0.0636887184247035 -0.392774166856759 -0.5131744358339 -0.545095911392518 0.472039920560857 0.701520957883329 0.750797125775608 0.161509025620822 -0.841091116986742 -0.939551234393064
-0.79474604742931 -0.507236325659456 -0.912850553161088 -0.434219415389574 -0.360531038123071 -0.851874556231656 -0.741765379505795 0.505382982184812 -0.712495901697441 -0.856005703267561 -0.398390663053152 0.904461759272061 0.594278439897933 -0.139389685039881 0.426927633780157 0.921751428569631 -0.33046839251728 0.448229910119958 0.912806156111625 -0.171994204258522 0.777351146221224 0.846068416865654 0.941035720045716 0.832127303069411 0.466940668332161 0.91278567216946 -0.0451864444883397 0.55266298120812 0.771155253524563 0.932259496813909 -0.297914767275982 -0.384382157621645 0 -0.724421360376979 -0.85916660235148 -0.370346772306791 0.933150094128448 -0.955893695345215 -0.926225162140846 0.950751543306381 0.902897251254281 0.902534288246762 0.87737852311214 0.610789973076395 0.370280185153976 0.20936980769596 -0.000107456928806065 -0.144120646545146 -0.219082993950896 0.00380737581321046 0.249322556802697 -0.0572805249245976 0.266439064479897 0.849396481442372 0.542767797409111 0.57101297667576 0.908797308133618 0.852406708741585 0.469219402770049 0.789749001496468 0.947218771744962 0.873134999700719 0.813719356021009 0.867516906423468 0.935320118414157 0.895249165302093 0.893778138676592 0.871799794818499 0.454953658655934 -0.695598164849885 -0.933628089128379 -0.96556904264574 -0.973459982740542 -0.926463322233976 -0.967489507337652 -0.956444660973481 0.883776148973726 0.984352833519391 0.989837866000932 0.949724844804135 0.988012525540166 0.990956702808474 0.987516071491173 0.96785391502495 0.992689643784105 0.992075279036435 0.982748204712865 0.990359780509641 0.983000861649711 0.958205809952307 0.964914266133378 0.966524233723692 0.977990559774014 0.965601006551553 0.963703327233135 0.967142659922072 0.961243698820249 0.955714204493418 0.960970686403071 0.955490503480462 0.937843398425919 0.911119547622601 0.926134978452065 0.870971329686625 0.854303371702094 0.881628758038213 0.794610781852944 0.799481392533828 0.87557484113156 0.855640589759799 0.644473129276201 0.708743877208247 0.784969440640283 0.122405555138204 -0.21519156201896 0.55748213435743 0.542357266147805 -0.723698756443753 -0.377354826772249 0.66177654945685 0.557115949031538 0.782994353254982 0.742267238812614 -0.83202759310429 0.778234865049705 -0.857949673261192 -0.947011954547219 -0.353074431521192 0.978321678649621 0.986276711218345 -0.965499952007471 -0.583608121036908 -0.121459553536533 0.526758094264454 0.275186124418113 0.16771643152845 0.225361918334177 0.296114554684422 0.710806825103112 0.811268252756569 0.741863048677106 0.734650758621753 0.815527455430738 0.754360970696166 0.786017922889641 0.75892024384239 0.572626817495152 0.87670589891799 0.937131370544329 0.921195014001878 0.904133633348078 0.899466460659423 0.901371740359332 0.904695772477248 0.897953353619453 0.873130108547908 0.847723171597061 0.90199983981434 0.914699170383956 0.950704273982985 0.969946077637602 0.983906878542942 0.980128980436211 0.948585137411232 0.698466828722421 0.79050923044773 -0.82585377625594 0.804288521012071 0.983875860831386 0.870663432847299 0.987733615031662 0.984926919050818 0.890156921377347 0.85322160279302 0.924639259069087 0.89443113183926 0.866647728952678 0.812912594662134 0.763160270833765 0.843997838702901 0.784829839252351 -0.138040269417121 -0.222657378626776 -0.13522338605754 -0.333225166050427 0.265213276936907 -0.445599385063765 -0.85357637618757 -0.559859929767391 -0.0705730257167809 -0.851063996596228 -0.849169492024735 -0.31991338255476 -0.426386901108009 -0.751922927024286 -0.437427184607327 0.513251837790761 -0.578312157637223 -0.682180074135916 -0.343868834670582 0.039867921974591 -0.0415467240089583 0.116057669683863 0.822159857425117 0.825194970478722 0.961837902616284 0.985088437118886 0.98699614312247 0.990456993145966 0.996902065232243 0.997807303152983 0.997726478241575 0.998094425006371 0.998097271175209 0.998059254310113 0.998131270377152 0.997469149790198 0.996453396697914 0.995760962810056 0.991671351169992 0.978332860786839 0.959888877016102 0.625719071759807 -0.944784462330481 -0.986366641825966 -0.992000578103274 -0.979482741393139 -0.949432668799334 -0.983774788560757 0.656327790237849 0.965522321363626 0.951498545079302 0.838159063721299 0.781079485984395 0.843453014017817 0.906288713192997 -0.365889203073616 -0.502559470666226 -0.978471601210492 -0.961071824910761 0.601492358836631 -0.967712508170222 0.93294259036515 0.929285047386601 -0.94927715275156 -0.927603638026165 -0.777893985184359 -0.627903475344604 -0.886632403103748 -0.949403801291776 -0.820540152985982 -0.109521080542644 -0.930012218478619 -0.924180385531096 -0.4595917032918 -0.365447046026118 -0.780185717140622 -0.843357449092619 0.0495406200211128 0.344507016790565 -0.648666770450194 -0.349250539166849 0.0981148824020227 -0.529481696824687 -0.404851564685752 -0.621298814147803 -0.753056711289774 -0.779110693580463 -0.823832048116772 -0.826561598522531 -0.421962073857965 -0.682840483248675 -0.334264968809018 -0.68248441491905 -0.74944743484 -0.804663094930687 -0.77709992772044 -0.887550980646536 -0.937071768176112 -0.941814147297938 -0.954816930817962 -0.903270158400974 -0.800833857660691 -0.282517367709989 -0.930252100868653 -0.960512349535511 -0.961461834509623
-0.329385193550085 0.33853737611203 -0.821241650784375 0.336055558108124 0.4217420234598 -0.62202410763247 -0.360857789411609 0.791354629818286 -0.130730153746862 -0.666444484411557 0.244943170013553 0.932220001111947 0.768549538620577 0.334366650751603 0.73739263779351 0.925045172248292 -0.0878500464819862 0.62363002621728 0.911072454765125 -0.280582359517927 0.677668288264831 0.796382686375455 0.884630434535894 0.488688580594083 -0.0548807948077269 0.825711887299277 -0.318598547920497 -0.175553943125241 0.530599781150839 0.836722210901901 -0.551416772850965 -0.443024265287886 -0.724421360376979 0 -0.443726226755041 -0.612372655247503 0.942608601380338 -0.212057541668526 -0.554741745790876 0.9677345482183 0.919057927173434 0.909206443252742 0.855576911261377 0.50208839791644 0.200990812233001 -0.178873221043308 -0.227885312969886 -0.222278487665071 -0.440196364722067 -0.274951476750751 0.222323683827877 -0.0364262460445523 0.231083028790228 0.843471726354977 0.664149152224199 0.665586328119583 0.915852316780424 0.847720135707206 0.611515366247356 0.851830453574519 0.948910558274227 0.889982692057227 0.859366155481712 0.901347289020113 0.938704107740535 0.908923401033702 0.912799367479791 0.903889955759366 0.701404230658317 -0.110981357881191 -0.811350500609579 -0.941279520756488 -0.956932698147429 -0.865966165097761 -0.946931167568337 -0.92795176675565 0.885246847651833 0.980397926247745 0.986699241307013 0.936569945511908 0.984742840815275 0.98808006607849 0.982519010805576 0.960565998990606 0.991145570376084 0.990620088607388 0.981031567207047 0.988394358531067 0.978901988572506 0.952920968082741 0.960498842506547 0.961723397854738 0.97304867721351 0.960191460290179 0.958005574605668 0.960317053961652 0.95519023304275 0.950478791926203 0.95432379131591 0.950157391585389 0.93458569276093 0.906222655847555 0.918719697832224 0.859844501261355 0.848209427633313 0.879572446939379 0.786257739011374 0.785582420808449 0.878423722549559 0.858034924704643 0.566504600667626 0.675078259433589 0.781165847008206 -0.0904978758521618 -0.513762399229303 0.459526752004431 0.464252085171824 -0.815209092323689 -0.611250372180337 0.580182405128792 0.413692348630435 0.701924161923634 0.655268143252625 -0.823782851893078 0.657429648817676 -0.888623736086041 -0.956685132915233 -0.420224943236518 0.966927658691551 0.983934066390352 -0.960721341310246 -0.633947565629203 -0.104823832271182 0.568443799819343 0.298562214856287 0.132234068374634 0.290972875632472 0.35390937993732 0.704751706198677 0.813602501267258 0.759459114667493 0.749359026455167 0.818766179988134 0.764719972713087 0.800687088155519 0.77426784769415 0.625083642842615 0.882959577676535 0.938204975746992 0.926055426978894 0.91035013276991 0.907250530795781 0.908832011096917 0.911062073251976 0.903910059898071 0.886725938227168 0.870515262637132 0.910146063123636 0.920913679871328 0.949562470555245 0.970135506400266 0.981212414945576 0.976764691997631 0.944616203134525 0.693441877291875 0.76585085880329 -0.803303027749331 0.778738535939895 0.983011332730796 0.86038744639507 0.987742588877484 0.985123549947247 0.881170491500914 0.847902171612066 0.92786595853046 0.898131420061567 0.867262795053027 0.80966108574412 0.755209973079848 0.834444501256094 0.758498966619146 -0.374186027886481 -0.483320597955186 -0.513340501200723 -0.669803632644252 -0.0850328323217836 -0.722817979617153 -0.919674306795717 -0.801090420578301 -0.567883734516425 -0.920960934838781 -0.920387420609822 -0.711035575925413 -0.767018849220116 -0.877015208222737 -0.755970171090726 -0.17833188937616 -0.811123261846066 -0.834331412750472 -0.701538820981828 -0.521184398518751 -0.560029930026739 -0.373299373471583 0.665088564603482 0.672104510628919 0.924532496248333 0.975463194698537 0.978735448675299 0.98337946562437 0.995899135694186 0.996992559055557 0.996945735927085 0.997611149608856 0.997341473764282 0.997054566829634 0.997129047017403 0.996361143255648 0.994719400869277 0.992617482204737 0.980860803715477 0.949405104343745 0.887058958865926 -0.67802624579604 -0.972995357159536 -0.989676399302143 -0.993231002627725 -0.985910542038207 -0.971468066473343 -0.988892333349708 0.520180684177838 0.970022655884362 0.941754154296708 0.77633921516297 0.812211185773579 0.853924351042202 0.912290461017778 -0.496155649396958 -0.397762299517044 -0.980480318974607 -0.963435799652486 0.797346846540653 -0.967367476058119 0.955137003741052 0.951205911777734 -0.952862040477891 -0.934520677091375 -0.762591839697198 -0.521478663337323 -0.886461276894765 -0.957526822016954 -0.837933271946214 0.00770338020951469 -0.941904620804254 -0.945047727060966 -0.510021099164368 -0.402143044585352 -0.866794850657813 -0.897206069009462 0.0707321319835294 -0.0705511545125402 -0.881816027166879 -0.707880261377757 -0.718993896080954 -0.913466422041801 -0.873834936626409 -0.920393387578691 -0.922996339540565 -0.91471593546961 -0.936791092137643 -0.935523417670189 -0.863976420193163 -0.905384423972064 -0.876397582759919 -0.931584324143159 -0.937725068200397 -0.947569252355578 -0.946546110422762 -0.978740472346316 -0.990825367846906 -0.978164885993952 -0.984411157376139 -0.987103035116682 -0.975424337664405 -0.863604635528104 -0.976487877172113 -0.97514736954234 -0.967461233493351
-0.469287915310932 0.213463104518124 -0.889491776279032 0.174958377384025 0.348072131432046 -0.743468501650563 -0.550240696187865 0.831198729950961 -0.16393241937007 -0.712190068819433 0.336232038778441 0.960964257075865 0.831346737717205 0.269389431755042 0.856844570723553 0.959100986746693 0.171609638287436 0.802744841414277 0.966935355208118 0.745798176502267 0.88623046412168 0.943917350640816 0.975182787179047 0.920052265812757 0.448910623312049 0.955212479673705 0.957935399903565 0.899216532343331 0.911640119778514 0.95337691477774 0.973630498590556 0.904130259810247 -0.85916660235148 -0.443726226755041 0 -0.642655925412132 -0.0787450175428148 -0.828282126979157 -0.87098592952863 0.832902786162383 0.687012646794308 0.622809646214888 0.215374369419816 -0.550133169391311 -0.642607372991449 -0.731927512595108 -0.74166138632363 -0.745163553174574 -0.810934721969444 -0.681454492531156 -0.258378028259587 -0.677820585105791 -0.448642070369084 0.851059160472056 0.452767963481949 0.438752086984626 0.937042067081995 0.859550576905197 0.504692486340478 0.868087729628453 0.963501949064649 0.906052433704423 0.879721150970416 0.92819012274119 0.955520935105157 0.928599161061093 0.935502185364489 0.929161272696533 0.740117172446672 -0.102802115556378 -0.864712208142191 -0.945721978709665 -0.954459713897154 -0.776429337846308 -0.9359116162234 -0.871583335977296 0.960895924070548 0.988921196524452 0.991244478962488 0.967198529308963 0.98942784601338 0.991511448631414 0.987942335166542 0.971264898358072 0.992879471017827 0.992126032443268 0.983346757829106 0.989901267112279 0.982895773954704 0.960099182971814 0.964939676954369 0.967117316506714 0.978896332467378 0.966432499384545 0.962936833249055 0.967997950222128 0.964300004491787 0.956155011290444 0.961498857396649 0.960588770093894 0.942148554173149 0.902615453579995 0.928856690360667 0.855836709569576 0.808485844343153 0.864112829843633 0.747833584275215 0.695876427413703 0.820034062535653 0.806014100432054 0.129925152380292 0.297453486713137 0.574859122716151 -0.510451541785051 -0.773081920126938 -0.245982174588086 -0.154260248706797 -0.878230626975512 -0.824697887975832 -0.12447127062473 -0.292181452206991 0.249109376951027 0.100418316318174 -0.855380190666805 0.141485855228703 -0.933395490463628 -0.971905669935957 -0.802986195807328 0.928835438156752 0.975427191593937 -0.978702101375773 -0.876131946870062 -0.638294894130048 0.0945789416235628 -0.502614884501942 -0.63280621669051 -0.398631227418967 -0.338154044202483 0.147883389145695 0.563272279035897 0.473335382622495 0.500356003398334 0.645483777530262 0.526364386976474 0.649743688936579 0.563602151650757 0.0223033491339429 0.828213143785554 0.927328711238348 0.900157360956666 0.875516737075042 0.879355738930247 0.881960662076755 0.882325468676823 0.880435165148704 0.853800783708643 0.813963655948819 0.884017217685068 0.90700362804408 0.95158105917999 0.972304368573479 0.985236035812932 0.982419302551519 0.954456224550808 0.670051823223747 0.744873578594612 -0.901401011784313 0.722775963261274 0.988362011411034 0.797564606022665 0.989930216256509 0.987712869667215 0.89237668986116 0.728954443410613 0.897910094510229 0.857878148670808 0.782053861426118 0.533982596451269 0.315463819500038 0.650686635549769 0.276883893926098 -0.844453430903311 -0.845795775740667 -0.836739934812004 -0.897035820119853 -0.752313032653371 -0.894100345073698 -0.944935282288569 -0.907631769047616 -0.849515419747934 -0.94039109267316 -0.938215065423528 -0.861833058670783 -0.873716969031801 -0.903859551354775 -0.846270120867282 -0.676532194965891 -0.864027711570151 -0.861288187207984 -0.806143985610507 -0.71831692694745 -0.673098573109605 -0.514149073436026 0.448116738925479 0.507847796553886 0.884002974409225 0.966228635312698 0.973051466963216 0.97874104444503 0.995199827985132 0.996517941655298 0.996397030767667 0.996904435424073 0.99639053858112 0.996126616666639 0.995475156212958 0.993511037033659 0.991780592846276 0.986601196650894 0.937529533735296 0.852551745500361 0.699417811115125 -0.901122209443678 -0.97931941194124 -0.989082109659648 -0.993064689487649 -0.989244342214595 -0.981422627813525 -0.989621905508241 -0.363512476179613 0.92550288414452 0.768149316997243 0.270860948630322 0.179254062551756 -0.0768172913858195 0.720448521121656 -0.876061905159403 -0.873062670572913 -0.987020582780514 -0.976266673754066 0.261711468284835 -0.982897084491772 0.902340139465925 0.896745114405062 -0.970970910256069 -0.961189253574264 -0.922951905945828 -0.861801915214398 -0.940608887346099 -0.971086772167143 -0.929169400489253 -0.677432403779581 -0.958436032386136 -0.963576692593227 -0.826303518113859 -0.686542950618458 -0.915613165754053 -0.949412340958777 -0.411089297974179 -0.415663396506887 -0.94693505766394 -0.901023131174901 -0.66441509033147 -0.894188262078453 -0.914188854579523 -0.908515850558433 -0.880831515077376 -0.897986808759121 -0.939823166004522 -0.916173317992132 -0.787507177079523 -0.874447711190328 -0.861055070182656 -0.911860293303813 -0.933232499859803 -0.916111566542986 -0.886005563293721 -0.958109586227159 -0.980598938029879 -0.917147658063964 -0.949743827419103 -0.95662990437815 0.160535172780171 0.731892182713298 -0.870305678274288 -0.921414954481719 -0.936660574014873
-0.394812408512527 0.279678148776677 -0.838361389320534 0.241545765288392 0.433966702267669 -0.575146948227236 -0.27840656272523 0.836077400607077 0.219263032544662 -0.371069265442212 0.567488828795115 0.957350575809686 0.891073823311399 0.6468081844399 0.858419232759455 0.961360429617083 0.775003663478045 0.865239441643561 0.960725151435358 0.92416595370847 0.945383543076507 0.933504451711213 0.971049708250103 0.969313724833169 0.861540143619105 0.929755613168288 0.962024555574256 0.971106936798461 0.88455276822991 0.938571722523517 0.983390350632794 0.966781323741462 -0.370346772306791 -0.612372655247503 -0.642655925412132 0 -0.350718148774602 0.320560520975586 -0.523316149167725 0.832159994312924 0.819093509453978 0.904438479017597 0.733619614028547 -0.457921897651135 -0.31208020167325 -0.313879543387965 -0.630117683907666 -0.745820075532236 -0.67948393397607 -0.115464880508668 -0.0776251128160728 -0.665853615957 -0.105682879841509 0.866302708726143 0.273516572915824 0.415656821077049 0.932917204860076 0.850271328194158 0.40517121005334 0.831824539563303 0.955712610473742 0.882252542815893 0.838091897271252 0.910462366012102 0.948113812932173 0.910383133196053 0.918355805536753 0.914529871330077 0.662196715659338 -0.381296898571492 -0.898214262413151 -0.943589940636872 -0.95277588224752 -0.729616101602995 -0.930137929077784 -0.8378984155002 0.966567293842829 0.989366246104017 0.991449577654725 0.968332640521506 0.989582184439762 0.991537053705581 0.988307509488192 0.970173065609652 0.992993260185884 0.99207848839524 0.98161570644199 0.989931246116677 0.982172798810272 0.954680711092578 0.959988152291524 0.96317457130662 0.978009597959926 0.963008318243877 0.958837529082855 0.966198406082647 0.962748005856784 0.953034092977014 0.960594098210971 0.961074671810085 0.943776057824703 0.905222922391339 0.939383365326439 0.905996906988787 0.871687586941113 0.896402355716975 0.875636969472915 0.879884389948152 0.887217813128488 0.901153918731011 0.735733043584042 0.74352992826303 0.795312466967553 0.354205009425266 -0.298269911607401 0.370778375629952 0.439205014582247 -0.704844204120153 -0.588039638699147 0.343636692236856 0.281408576133191 0.695778361445613 0.561607012016551 -0.7498280289698 0.310370362092077 -0.930655861158002 -0.972218241644846 -0.792601309521474 0.878338487035538 0.966252581699615 -0.978523146815185 -0.888292392967547 -0.640304878628256 -0.0538749402537589 -0.612974550348883 -0.650861021277215 -0.46637366066096 -0.49897640792781 -0.0472664405496656 0.489333822171967 0.311563361587277 0.374755411893089 0.58817594698341 0.464883059641478 0.547020084228069 0.437619405011999 -0.23327030586751 0.78144753695734 0.915720135222082 0.870689001842636 0.841905423509494 0.835952301628417 0.839818742606206 0.84271335883878 0.843960498141509 0.782289431861021 0.691466648624263 0.829954365039795 0.873362625270073 0.940971289591632 0.968354345690732 0.984391738389272 0.98159757939634 0.950303254230682 0.707455398710801 0.796831923134512 -0.886694976366825 0.799655348582409 0.989481473129926 0.838212585114671 0.990159426435666 0.987311002852082 0.923658649499206 0.786399923855116 0.879250891281429 0.848409117779662 0.819263944467865 0.577568789523936 0.349639670202826 0.778363175251345 0.559799985799969 -0.81161510085794 -0.753133644351936 -0.62947533912078 -0.830186466982695 -0.56031275622444 -0.839722943646863 -0.912596397263435 -0.83913173036234 -0.727292763882693 -0.897689868981598 -0.885573692931713 -0.674107814312344 -0.719267443778676 -0.778826685879643 -0.549114211153802 -0.0619377327471062 -0.617522274688463 -0.579381989059111 -0.411973651418501 -0.146289505873511 0.0785541753292782 0.344770329595679 0.793584070424106 0.835341606092108 0.949686771790376 0.978972502349761 0.980970991827987 0.984887221032639 0.996011090272994 0.997378168949092 0.997315292488079 0.997659531349911 0.997502376275134 0.997389995292252 0.996763231574603 0.995623165419947 0.994896041894341 0.990782647127663 0.963355381204316 0.946788476079785 0.912326365321793 -0.860122751364478 -0.977452819682723 -0.987690085057682 -0.992829312623827 -0.989403596517279 -0.980092369879135 -0.98802502709532 0.0290019177115505 0.88909463931625 0.821617182051541 0.686458643174142 -0.0240878886656417 -0.572236389719106 0.638559095502236 -0.860957761109231 -0.892810321093982 -0.984978092904129 -0.972157493148273 -0.25651276347104 -0.982913279360167 0.780062951583499 0.825252897068422 -0.96810753448944 -0.957605953443333 -0.912221358002489 -0.844370631673442 -0.932064431969304 -0.96602231043385 -0.900197336429403 -0.518505805324595 -0.94751544952136 -0.947351516088187 -0.623425021976964 -0.386623542072079 -0.833454561088091 -0.915450789485015 0.204316644871357 0.672680072774784 -0.856050660848945 -0.553762821033708 0.80378450091406 -0.230485984478209 -0.72092603642567 0.0545201408660913 0.307056942920262 -0.510456378101023 -0.839031613455515 0.00467655223813762 0.635297856495527 0.0120544562427358 0.369108016242034 0.0902475023550238 -0.359038094645414 0.715817909585964 0.851280806897844 0.758509936792148 0.851760136851728 0.872107086707188 0.850353618810163 0.912274796178882 0.961961801357385 0.957365297368649 0.427815145873173 -0.246121452259736 -0.732692768425786
-0.835606794083026 -0.717822264334201 -0.92641884856455 -0.572139578514182 -0.596264470837324 -0.884669763266718 -0.753692189140131 0.460241381889284 -0.737674811128113 -0.836055644479562 -0.137834240047223 0.909551918244198 0.594155513785767 -0.121865845064326 0.660308285973519 0.926574403604656 0.144466564706975 0.755195403947303 0.950510140899267 0.883949258400343 0.913534697817622 0.93937235558709 0.973031854155209 0.960598754352612 0.871201871809865 0.957745604550446 0.971428191955733 0.968324371785887 0.950614400246475 0.977036990478722 0.98864866706284 0.985201795278483 0.933150094128448 0.942608601380338 -0.0787450175428148 -0.350718148774602 0 0.0257171700865947 -0.850249053637022 0.907162404453589 0.932848032473349 0.930356380981809 0.827892628042313 0.582550765280843 0.536837999864627 0.147488393234195 0.220166245995172 -0.00376094840887565 -0.146587214655049 0.604576274315621 0.747848141690654 -0.0985601386028808 0.361299064266664 0.931391209506878 0.717047701746076 0.695877374618079 0.947321452944924 0.92069218484461 0.749101306760891 0.864477747790394 0.961962906808659 0.923549240982891 0.894131147238111 0.91881187651355 0.958111027550015 0.937766242374599 0.935246594193979 0.920779306627135 0.744459352598401 -0.363606090738566 -0.930110452289984 -0.948534594877097 -0.956786161240823 -0.705283952468017 -0.930993062063155 -0.807055725639674 0.975884688853439 0.991231002160067 0.993015503471605 0.978829582153527 0.991509294292687 0.993244949942611 0.991518774364793 0.980362040673505 0.994051526042335 0.993326056169269 0.985719422369968 0.991914449502236 0.987187698630296 0.972406685148408 0.975305442746475 0.976645406833073 0.984952383767513 0.977388442353868 0.975995229302554 0.979155713760493 0.976838125064377 0.973217096259824 0.977177806245235 0.975017255588364 0.966196968574884 0.953600716194929 0.966098993863768 0.948021500836909 0.937915097783381 0.949692303210747 0.932690720219418 0.924987197228532 0.935353577083898 0.943368750261503 0.809670137977299 0.8252159382015 0.87343018509789 0.461223819274266 -0.379122291841096 0.451702020509907 0.489225631657236 -0.819737169325873 -0.721078415286424 0.283426106449718 0.0118356263122208 0.473770341563588 0.328205744261976 -0.85521411703168 0.183841495899851 -0.939070222647054 -0.974797814493632 -0.818720562075166 0.942853194028314 0.98065679374837 -0.982470015375619 -0.779979448507167 0.0975609617211355 0.655936760653966 -0.0222072267718941 -0.0935553629093754 0.32575330452452 0.220646777371755 0.595369424519288 0.801159377689403 0.775435049863776 0.822493522856983 0.846329509490727 0.795655901654466 0.84215027217613 0.799864931057938 0.355647073881586 0.896293601471381 0.949015551191958 0.923520755859941 0.908755047992074 0.908379165838072 0.910607744019412 0.911025305578363 0.913176202310717 0.885826219599648 0.839278322030033 0.902090811624022 0.919962886691731 0.962317517382058 0.973634452159615 0.987962007536901 0.986224253499626 0.968017721418963 0.856171545848333 0.894617635975815 -0.834090562379656 0.88930554840176 0.991181697921012 0.906533673358966 0.991512436535539 0.989031845564089 0.954654057052823 0.878454395790332 0.919824022691124 0.907470439833771 0.880416792197353 0.739524953877395 0.622179615072865 0.853210516533096 0.666829740438019 -0.756425140885482 -0.650808198759918 -0.566020120072231 -0.820238280062019 -0.52162544484312 -0.85047019050801 -0.922018487368852 -0.861432712273449 -0.779647453913477 -0.921085389873851 -0.914875344557463 -0.779022733816281 -0.821595162500832 -0.866080922291159 -0.748164884305957 -0.397113584264438 -0.786216067945009 -0.767122410540114 -0.665400803193105 -0.486574945356128 -0.336059912601238 -0.0846327030152491 0.696625502685099 0.764037422398794 0.950443150441449 0.980414127780828 0.983108980066054 0.98724508009771 0.996408074498263 0.997783808292949 0.997744681021779 0.99813902858825 0.998002252699947 0.997968419006654 0.997688303627409 0.996621216593443 0.995730379809718 0.992926400731753 0.973250381883537 0.951131851714104 0.918719260013391 -0.865077549459338 -0.978901942821683 -0.988607214256275 -0.993260186202493 -0.990268831876744 -0.981573191793761 -0.988573454363849 -0.44454266627173 0.799286142161854 0.785624418962904 0.529759833416759 -0.539111823287398 -0.76456756465545 0.386173880050989 -0.902111535017796 -0.926299176079476 -0.985101884644804 -0.973714397125747 -0.72940140286027 -0.984976265222833 0.259233128913186 0.394907993905203 -0.975251709665343 -0.969199756556924 -0.944313307676849 -0.920091258752796 -0.959557112333534 -0.974105536107538 -0.932927786834673 -0.834529152710986 -0.965021809383508 -0.960042252565773 -0.806531207347981 -0.772728835329006 -0.910016458586605 -0.934495185187363 -0.380283995692608 -0.0303661187531313 -0.903366473867649 -0.687561726321798 0.594529239377544 -0.618462315257163 -0.801760776363952 -0.177261623512793 -0.308866349310471 -0.794182716303874 -0.888230573857465 0.00986921493898184 0.300418474904506 -0.722962828699649 -0.694104219808522 -0.765074072531325 -0.831457232968647 -0.363297035654481 -0.211028463824193 -0.658933512209406 -0.901488900663553 0.354344055027691 -0.418870949997472 0.561274962521414 0.939947412604459 0.930531927929738 -0.197683164019966 -0.640853565871783 -0.891671032450411
-0.980613337886164 -0.978170044677626 -0.985087726737072 -0.977449118593821 -0.976282692494313 -0.98397592642149 -0.981083653029137 -0.967791798722499 -0.981862430931028 -0.984361249177933 -0.977213643229326 -0.951046863776779 -0.972699341131005 -0.979779014948933 -0.97280618463513 -0.958244768510574 -0.983380595392325 -0.975037473996256 -0.945942265969116 -0.976760428258552 -0.973979109115584 -0.958335201484297 -0.953086389652118 -0.977977246852225 -0.978580055912511 -0.954913177377618 -0.979681537802101 -0.983515360228451 -0.967779971709559 -0.924716282305904 -0.967900597312584 -0.971126838513866 -0.955893695345215 -0.212057541668526 -0.828282126979157 0.320560520975586 0.0257171700865947 0 -0.191142161745274 0.94698194587312 0.247546959798557 -0.834998891236935 -0.94325407882229 -0.922926643417563 -0.942675857591048 -0.964700045328585 -0.966673536835025 -0.956052236120305 -0.966026949142093 -0.970465158752366 -0.949030037957311 -0.963294894877551 -0.968948483376941 -0.918667588325527 -0.942919460694879 -0.95683201580649 -0.918504833496268 -0.88457717712178 -0.941876648243856 -0.942161772347642 -0.757652028431821 -0.811584474352731 -0.897116712986832 -0.905827149427869 -0.522568734059538 -0.672316875912951 -0.840301247101403 -0.826382379377209 -0.89238867122654 -0.963685238797671 -0.979924000241113 -0.983770425026866 -0.985166385267464 -0.973749528819753 -0.98367003072154 -0.980022117957596 -0.319644467465925 0.95479004922777 0.981239354371417 0.670695911495888 0.975231346495841 0.983805728408132 0.976033331106681 0.867010359310902 0.989978194511846 0.989277449409341 0.966814420382606 0.98771615321869 0.967303224548447 0.804336829310666 0.896592491628319 0.896295566486578 0.936400570058899 0.859752741707665 0.880098587518831 0.860938205198702 0.742080417130144 0.770018765302333 0.834480887875365 0.538273740135373 0.134487855912047 0.0374311824377073 -0.0451586304507785 -0.765465906763746 -0.716031634008552 -0.505402278207211 -0.862179425901055 -0.830416332100256 -0.524457771653143 -0.59857398172656 -0.901389007203057 -0.821499158371045 -0.639122025663505 -0.924485375832823 -0.940532402882162 -0.815243447755628 -0.8140107661181 -0.949157788627114 -0.915297901785475 -0.534045859602901 -0.617204040354746 -0.363702263224692 -0.361258582133087 -0.913693126527842 0.380603155559619 -0.912256364768608 -0.963351006481923 -0.65510912881205 0.95074016130279 0.98027774599777 -0.972703728563526 -0.891281987435243 -0.740380691898167 0.0945025624206613 -0.689750960488611 -0.843449889482842 -0.734178989662925 -0.701194340978125 -0.69938103515266 -0.61124515219371 -0.553982234046568 -0.287930554376122 -0.33730216315344 -0.645285857667182 -0.296266199940465 -0.348397810129266 -0.818312386186376 -0.183996070534003 0.8231273533882 0.661835751080225 0.227814497527592 0.270591386632729 0.532962163024404 0.331024214634384 0.0140332079665174 0.00979433991718198 -0.170740704843916 0.04297358938791 -0.0765417152951898 0.665375550676451 0.873066862123285 0.958790249787463 0.932766476311758 0.364531972337266 -0.866466110831666 -0.799114679453473 -0.973037448688977 -0.745415833512075 0.965539244257176 -0.510421375736383 0.979384280877851 0.966887263642739 -0.289481811592696 -0.538682122968367 0.0970244304629212 -0.540281960623226 -0.744556815479127 -0.776725040191777 -0.797858798242572 -0.767484056756253 -0.866316098363594 -0.943966551759044 -0.943399806217004 -0.946293906877087 -0.951146431567341 -0.912483211860366 -0.955101787652607 -0.968544010854077 -0.946699550145946 -0.924877753990188 -0.966371841500796 -0.961074659365181 -0.912162485206493 -0.927219896872032 -0.944096956197578 -0.89811036605578 -0.69888308510809 -0.895662395205781 -0.888577203320068 -0.783375824451039 -0.618270660887695 -0.628690215336717 -0.393633182537245 0.691595255350443 0.799876377830554 0.957576531988907 0.981244737007387 0.983839764315698 0.987230072043373 0.996461391832121 0.997862741174397 0.997786901433932 0.998199134824981 0.9979699380798 0.997922153834013 0.997700041917349 0.996108428609432 0.994188416377612 0.990974290617625 0.956921989788758 0.77889343753366 0.183520653812445 -0.94159818878847 -0.982967714998943 -0.991217141191996 -0.994170752945734 -0.991927692856792 -0.986634103806808 -0.991399292171824 -0.955540846956867 -0.681839773899492 -0.636567158309375 -0.92097899209361 -0.952142614362855 -0.938660666949752 -0.87101149728494 -0.97257366853516 -0.976882469845351 -0.989570009416031 -0.986709598551678 -0.966935772595662 -0.989310100880959 -0.922908477156848 -0.931217598768514 -0.987444167223574 -0.986631347255162 -0.982702652339828 -0.980314430088977 -0.985599862352249 -0.988135936467792 -0.982500019971285 -0.977700167886323 -0.986840901123125 -0.986289439779796 -0.978807598188474 -0.975704958952975 -0.98208889849702 -0.98366518604762 -0.97411541734901 -0.979244616949223 -0.983349960139529 -0.980482010170743 -0.980880909438922 -0.980839946418268 -0.97794232637601 -0.984150442841447 -0.983184138817721 -0.977590077815641 -0.979361213641172 -0.980397781567659 -0.972620397524083 -0.979171704819502 -0.974169312762417 -0.959103426639382 -0.945484731298014 -0.963619348235979 -0.95609258954314 -0.951627037132422 -0.970321731312345 -0.945047171920615 -0.953413631898268 -0.67801990721051 0.59543909808944 0.371807211787228 -0.791536963539306 -0.830154208473838 -0.935755295208656
-0.980816424053254 -0.979970950304703 -0.984922206626442 -0.976428716115343 -0.976272581990111 -0.983638860797031 -0.979999061767525 -0.96714781498653 -0.980164814887768 -0.98325985937344 -0.974355795252301 -0.951851551690798 -0.971244129610076 -0.97657141271776 -0.965910735635793 -0.95045220211111 -0.976926315228354 -0.967022843390196 -0.933706913208612 -0.960913617662403 -0.960957269881866 -0.939913696489964 -0.923665124812865 -0.955912821823759 -0.962308497555445 -0.926599021174287 -0.954036945461521 -0.962953398838936 -0.943042749786886 -0.890314104493307 -0.919326115219593 -0.926025492511008 -0.926225162140846 -0.554741745790876 -0.87098592952863 -0.523316149167725 -0.850249053637022 -0.191142161745274 0 -0.794659597109799 -0.971435209270253 -0.987844752128698 -0.985624239681176 -0.975707227761663 -0.978423843519154 -0.981086742943949 -0.973285727088722 -0.971028715379795 -0.976701604915235 -0.969854225579339 -0.952239317800409 -0.970311330312822 -0.970992365828519 -0.928103117082087 -0.952178033194916 -0.963432203459179 -0.935760658217284 -0.902112088905988 -0.946094013351843 -0.953226137247781 -0.878438928778574 -0.884847988614883 -0.930296008588106 -0.932941042033453 -0.82004772301088 -0.855327811516188 -0.911037898362937 -0.902257336435792 -0.918724481779227 -0.965940873783244 -0.979580927091923 -0.981771893498093 -0.984405294989152 -0.974912099339581 -0.983098411662429 -0.980418924417696 -0.841606626403648 0.72794755256625 0.941642719743714 -0.33505611508316 0.923581631671131 0.951278381957921 0.936975667162656 0.394299864397652 0.976844893839232 0.973896467068825 0.879522949655658 0.975224242881361 0.901716724484097 0.134552510383521 0.568849670078701 0.538568342222981 0.747699935745274 0.36961929412523 0.503385685505966 0.387831313151909 -0.0178166259848937 0.115661665659325 0.362954934954915 -0.362215296202867 -0.633381124143109 -0.631210016099356 -0.6516556627796 -0.88796237021555 -0.885383048679395 -0.835266393343428 -0.936027141707611 -0.929137695182683 -0.856471188455751 -0.877082714170422 -0.961480757570268 -0.936874618551233 -0.89279009486772 -0.971985472721472 -0.975590809353618 -0.927818147419178 -0.938823183082403 -0.973006007140684 -0.951335309419769 -0.742744875850991 -0.772743094431354 -0.630789805325173 -0.584152007548783 -0.938493000426796 0.441581905084965 -0.899656947312479 -0.959541388901553 -0.611377727901563 0.938236603980952 0.982744727795806 -0.985792474867563 -0.965225048807175 -0.906065984556487 -0.37325739187973 -0.875875074616396 -0.940103443312702 -0.871801301072946 -0.859470795977113 -0.894792364800521 -0.873997487228496 -0.82826164492303 -0.713131816852737 -0.766102529040424 -0.849235480789893 -0.72693725265815 -0.728819606071129 -0.906335881050216 -0.725214124818113 0.530630856758347 0.0648403604686712 -0.511320896901081 -0.542886034744395 -0.209503891814478 -0.447487599938835 -0.655572249915745 -0.661941882505329 -0.720620992830493 -0.662464313175588 -0.723035260089089 -0.248475703028781 0.477181776461883 0.857518502183964 0.718423545475157 -0.563946269149236 -0.914300603623001 -0.874711045761094 -0.975678780818468 -0.842037871157921 0.930598648195332 -0.73210483892247 0.963805037461297 0.917643146280757 -0.707050373370483 -0.766856846304556 -0.632668921012124 -0.841141106927977 -0.891829115193223 -0.903016642635763 -0.908749127933611 -0.898414514309369 -0.939458618948791 -0.968996039531586 -0.967958364509456 -0.970262223322867 -0.972827945419588 -0.956441771152694 -0.977131121513327 -0.980430846509553 -0.966739390760967 -0.955620680019043 -0.977302158616427 -0.970335722298272 -0.927842951279996 -0.942005697971741 -0.949325915240471 -0.890297222220636 -0.523464902281118 -0.86053502544985 -0.834015395279673 -0.592258367021771 -0.200234329281679 -0.230875724420797 0.125359028284537 0.836082461139449 0.902570688321114 0.976622510373166 0.986757661576901 0.987908822723137 0.990643269168072 0.996843330794343 0.998236701606708 0.998154819440697 0.998640962925113 0.998564559497979 0.998587721362206 0.998569065420559 0.997696890247394 0.996411170611029 0.994572851576892 0.979651597735279 0.895040767781985 0.4897435756864 -0.948501972211187 -0.986500986996326 -0.992906102530206 -0.995042710963019 -0.994345196789696 -0.991093486090955 -0.993361878805521 -0.977040956814831 -0.932616810688033 -0.842022169884219 -0.958504618529418 -0.976298587550199 -0.972643653838 -0.94762254151009 -0.982418672485501 -0.984610925875924 -0.990372812824325 -0.989021895992065 -0.980277449468943 -0.990348431389325 -0.959730259124426 -0.962526545103666 -0.989500098435726 -0.989082491108408 -0.986048611278918 -0.984458493245708 -0.988451343459602 -0.990151553952764 -0.985190054112655 -0.982059050456078 -0.989217375583709 -0.98848025094106 -0.980975044108564 -0.979413850790582 -0.98481645440175 -0.985113636370634 -0.974785686465736 -0.977415694546233 -0.98411495950508 -0.978096234062018 -0.972378222253703 -0.97857239418561 -0.980134040117177 -0.978010158752537 -0.97643797117534 -0.979044414623381 -0.981103433346581 -0.96986169279431 -0.957621787683881 -0.971741010323843 -0.969003182604258 -0.937043693204346 -0.907384843439685 -0.940371223917765 -0.923331548214165 -0.761239583325971 -0.849063871554953 -0.870848001957142 -0.799465222637995 0.306797363759847 0.694902894062708 0.576584001922203 -0.402493654101321 -0.545580645102044 -0.882146434911784
-0.980491073630891 -0.976959675790196 -0.98452236125377 -0.9720453711253 -0.973260978710621 -0.983578786407854 -0.977653262265911 -0.942268486873441 -0.977303959255054 -0.98134293057966 -0.965123715853244 -0.721177866065312 -0.925445786220649 -0.966855043626892 -0.92773221349983 -0.419809265474344 -0.946591947783982 -0.890911239739918 0.482886148818333 -0.122628700360493 -0.13153737786475 0.584986179962269 0.874877044680551 0.754865922378177 -0.0564109556401864 0.833839552364465 0.879513416305314 0.847579765873858 0.872697106646895 0.961696464107432 0.971682120474445 0.975630972681911 0.950751543306381 0.9677345482183 0.832902786162383 0.832159994312924 0.907162404453589 0.94698194587312 -0.794659597109799 0 -0.624618195078828 -0.964902786527713 -0.989523582173201 -0.911066048105704 -0.986515888768098 -0.988686528006647 -0.891821596760578 -0.950918340904523 -0.983642364461492 -0.898084295229036 -0.322744849453786 -0.974637540488615 -0.975434342825695 0.644490789720841 -0.859026641051461 -0.959859984900074 0.228391778431373 0.620373266369224 -0.79935463147537 -0.895107177932132 0.731072543546124 0.415418985314652 -0.608818558065307 -0.608890829096132 0.800009117450736 0.556823537925246 -0.179260660381629 -0.0755077098111242 -0.597524278921159 -0.95222520502384 -0.981570996189641 -0.980371822274579 -0.982038989622488 -0.95150549458078 -0.976156205400918 -0.961857922717867 0.924609250014443 0.985876930951405 0.990640820974777 0.95906131095722 0.989567521039334 0.992130019519458 0.99030070954403 0.970402639091861 0.993645552622299 0.991896720499804 0.975328857649116 0.990807925181799 0.98366629982866 0.949832818770491 0.95770472271414 0.961800910686859 0.980913273190578 0.963316374673422 0.962098826214575 0.970372618380446 0.965917258983692 0.958722352212546 0.970274320441503 0.962250204747782 0.933749575310069 0.913293108595538 0.947597850004134 0.841769149211376 0.731344551543731 0.867600089895616 0.531411820584668 0.424986840528608 0.661311181030995 0.810190755461462 -0.740409995050139 -0.547841399948938 -0.102005826151962 -0.889973012999218 -0.933453232974115 -0.808201571687068 -0.839886352508575 -0.950548752816733 -0.923039414987113 -0.72788139480871 -0.788282216337534 -0.630807205173807 -0.669842264457774 -0.948250492584494 -0.215886328482595 -0.949952570310655 -0.977199362883067 -0.911871526214186 0.943638560060023 0.983639634644171 -0.992976847457713 -0.956619991679722 -0.693075924134446 0.267314639762912 -0.83581103634259 -0.894720346851878 -0.591812766812256 -0.719257134034184 -0.780100194675455 -0.450162586931157 -0.140385463168416 0.299604633903723 0.141359900137577 -0.191632500853549 0.334031124446012 0.0479815388721864 -0.80600714108516 0.460182144219694 0.900530155175777 0.751842002494854 0.591135501137877 0.599379540297935 0.695559007947474 0.608209458889697 0.570542489044726 0.383863682191583 -0.0283224660508094 0.342571546450198 0.439196216725233 0.886032364154811 0.946451175487194 0.984026852984602 0.981350287921171 0.918619360041907 -0.110820513457646 0.463801873731362 -0.968440485235231 0.476241521361935 0.990042968111998 0.587110539665013 0.989498910885337 0.98173284140423 0.848781827169886 0.254402276597939 0.403367499638865 -0.0007031185573835 -0.395053123679067 -0.7215954344042 -0.772068953084992 -0.388056857479264 -0.83482227016439 -0.9579194910918 -0.946497859177677 -0.938616260560886 -0.954852829738011 -0.918693778900164 -0.961909048039604 -0.966331708020456 -0.94194203613038 -0.92079594957112 -0.9579097076735 -0.945322363116904 -0.877097141506365 -0.894099095479152 -0.900665492010077 -0.81066526285523 -0.385652169329188 -0.753315150242708 -0.709606420487147 -0.532742374174024 -0.1521912021896 0.0481836175561107 0.224877998415295 0.810025577234747 0.886465674184166 0.977328091856473 0.987585304149148 0.989616104748535 0.992495323284988 0.997093713715278 0.998333594182801 0.998233388600785 0.998611512172349 0.998570291435814 0.998679011698664 0.998577685287273 0.997643426562479 0.997090503629292 0.996064514757719 0.987937613266336 0.968214302099684 0.954273824645534 -0.825723825579149 -0.981074287633554 -0.991110056115444 -0.994750371073705 -0.994238011058209 -0.989626709256439 -0.992572335721842 -0.958938802110494 -0.855542054021681 -0.00778578782085409 -0.851953424067251 -0.967748067016018 -0.967785593671773 -0.900718107716697 -0.978510385107724 -0.983748761904981 -0.991185897385765 -0.988645804116744 -0.977511953425127 -0.991329540858661 -0.949630608454404 -0.947862239528089 -0.98939114323057 -0.988536656911151 -0.985932631970854 -0.983559813832978 -0.987517462128413 -0.989761239238271 -0.984064562199654 -0.978578108583583 -0.98763303586057 -0.987326367667527 -0.97761817395673 -0.969075490467259 -0.978086004824135 -0.983944148735888 -0.956236326230839 -0.945609764642282 -0.982117046332316 -0.96437078135556 -0.728216292366349 -0.908890186073389 -0.956937070041468 -0.767759368163376 -0.537488305828657 -0.879979651971619 -0.887899630218144 0.692767857618773 0.66955303106499 -0.120000319178752 -0.0240632820428621 0.616675459213052 0.765334837806042 0.832390974968515 0.821161567502643 0.893132543649094 0.804661131612176 0.85712693109428 0.81255461170494 0.889597227068427 0.936246457126003 0.935177604381406 0.720041047372546 0.476389552770266 -0.502136938976852
-0.986349254612919 -0.982959240224237 -0.986922301887144 -0.981467161277127 -0.982475606695226 -0.986994440005128 -0.9832096559336 -0.969531133625679 -0.984311910238695 -0.985534542404899 -0.978262791138264 -0.927740083870014 -0.958925818213065 -0.97720324960328 -0.969936083830758 -0.872573888213616 -0.965134314913835 -0.952755779859893 -0.553921670836913 -0.50648814845128 -0.47126109768943 -0.0184609216163156 0.827665534550553 0.771757764280844 -0.348185477057205 0.689097603019331 0.84953349419672 0.863231389716005 0.860863852633698 0.95047733829635 0.967162700695014 0.972071664303463 0.902897251254281 0.919057927173434 0.687012646794308 0.819093509453978 0.932848032473349 0.247546959798557 -0.971435209270253 -0.624618195078828 0 -0.79140805585225 -0.978479011940438 -0.939025397575336 -0.983411749569407 -0.977752442169371 -0.941008135835212 -0.984653408595807 -0.986088530177763 -0.955551917280304 -0.912660108832814 -0.98948129729208 -0.989830330227949 -0.769441146008731 -0.981323910100421 -0.988719413182168 -0.955681293960065 -0.801380895028933 -0.975243794347904 -0.983168236439139 -0.866273168699627 -0.911832729944955 -0.96921105121015 -0.966406138458875 -0.687444075008809 -0.882686887310888 -0.959667091782954 -0.943511280119614 -0.949273871511077 -0.984995398099479 -0.990544179732191 -0.988790100533278 -0.989233554530218 -0.97842757933069 -0.985382940124668 -0.979178666034563 0.779138193688073 0.981918412569961 0.990384095144263 0.938870769989434 0.989310681701093 0.992013620526146 0.99036842533962 0.952540906091069 0.993591851882066 0.990717371324454 0.941663465087281 0.990042383515111 0.980198433255024 0.856623037466676 0.893510703303423 0.917870715173556 0.975138129597293 0.918188776068223 0.917950822625226 0.953048244900409 0.937609539002305 0.909106351866703 0.954659507489205 0.931891390132976 0.814002017482382 0.754993816367303 0.903233995139645 0.542557186125336 0.25702969009623 0.648838161697558 0.0415927135231458 0.439903015610056 0.473391417260463 0.767638098870668 -0.461113192601025 -0.217750073756313 0.078077342447361 -0.787271486719604 -0.871363085228993 -0.609563561858251 -0.724590316396726 -0.920000754549106 -0.831853494581409 -0.239527194019755 -0.161176316300733 0.509020793014567 0.147435208329514 -0.951310995473918 0.765471217040129 -0.909601958507299 -0.962879596196804 -0.846688265298541 0.984009363386057 0.989490517490499 -0.995180310262411 -0.965382190592489 -0.756729136816646 -0.247670415963994 -0.91256031907969 -0.92817521263425 -0.833948953413207 -0.89326741974531 -0.897695781697188 -0.81342728218184 -0.80922529110468 -0.627541390100554 -0.549172252745049 -0.722993137878408 -0.574430784448303 -0.608486530208031 -0.906236213926026 -0.534371551167068 0.741760323900155 0.0691604536727492 -0.327109605332679 -0.501688853665192 -0.229866115448796 -0.368297088421601 -0.511853501543718 -0.696786164109544 -0.809852949823844 -0.672583570174864 -0.656989595166785 0.331738932248799 0.854655711037855 0.974154957687871 0.970427521901381 0.690798400772291 -0.724049738716811 -0.175237145480088 -0.975531960765046 0.0985664583872842 0.987972342795604 0.289868922230193 0.985681777074929 0.971435519145127 0.758441600457516 -0.082689422315288 -0.378409889532237 -0.644022781235432 -0.658789159570409 -0.799689529044952 -0.837691577578297 -0.457386743263083 -0.800526791940435 -0.949497819262973 -0.92374713308388 -0.882741728083001 -0.918804730691853 -0.851355191877722 -0.940221740481506 -0.941996935390868 -0.863402343176391 -0.767861756606049 -0.906379001143123 -0.835667228995895 -0.30450347298331 -0.324811842081191 -0.347559969306061 0.339198930516513 0.877302751485121 0.654381582408759 0.652378111016496 0.770335692856274 0.879215708423944 0.897893457574424 0.884762208826063 0.949308972876628 0.964508885770342 0.991279645416062 0.993829390261795 0.9943537780102 0.996243200757311 0.997798495653071 0.998677146275802 0.998565765803954 0.998972504836126 0.99905234460628 0.999156534461753 0.999187024164672 0.998935985469184 0.998743377472892 0.998295890976599 0.997113984316034 0.993727323874764 0.992179827977867 0.862289771254737 -0.96475411387178 -0.989579750710244 -0.994837052645028 -0.994485705388466 -0.988401898405792 -0.991858888614456 -0.956636144277809 -0.869130048834435 0.697480879827683 -0.727902210097904 -0.972738316451766 -0.972383274500237 -0.907022380808679 -0.97853272888077 -0.985462412951001 -0.991104912681518 -0.988992389921413 -0.982022315121635 -0.99161896454027 -0.964641756251596 -0.961667079082134 -0.989867013957274 -0.989128966220485 -0.98664638982277 -0.985009975477283 -0.988448054622462 -0.990098787674739 -0.984542504036997 -0.980402569221823 -0.988067942216554 -0.987345172678244 -0.978722217685154 -0.972341404946959 -0.976963942578176 -0.983627688838337 -0.964315306359131 -0.943124021738877 -0.977841183556859 -0.960237572329856 -0.317888244396702 -0.454513531039338 -0.792377640258897 0.291373466498567 0.824657791952993 0.645699457341646 0.860233138291632 0.959183144698917 0.948734302368081 0.93595661525745 0.955879722298871 0.974257196684201 0.980420210900805 0.962104432920808 0.964065363205386 0.970992295789765 0.929407273549944 0.941816302811959 0.934166882287568 0.939350158801206 0.952635132296628 0.95771212008051 0.853316653641229 0.607392890903874 -0.531885009245157
-0.982472436486396 -0.977376296520997 -0.983577986120472 -0.975350072556284 -0.977297122541884 -0.982888756490231 -0.976474364460287 -0.955885448153683 -0.978960439860609 -0.979791005405674 -0.966435637392644 -0.873205648566118 -0.935122381796978 -0.965143621576736 -0.9538305967449 -0.769101971365061 -0.944015148746678 -0.907035832488126 0.378937859320892 0.525579127615506 0.550736217326523 0.845656861839172 0.951514235513452 0.93141075303131 0.671997454551128 0.916855753618666 0.94259634072815 0.946207334515988 0.959096100446452 0.965450390360178 0.966756351635155 0.966620045067027 0.902534288246762 0.909206443252742 0.622809646214888 0.904438479017597 0.930356380981809 -0.834998891236935 -0.987844752128698 -0.964902786527713 -0.79140805585225 0 -0.851237131724548 0.904923569256074 -0.726526232181681 -0.550090152329488 0.368381370733145 -0.94018563571756 -0.921639440286176 0.0174839934336274 0.00936677566545904 -0.974993851068808 -0.961646109497557 0.60034118135861 -0.96879719131494 -0.968838528116506 -0.701336314952992 -0.237413091798888 -0.952466907040044 -0.964291617274325 -0.633057220969201 -0.820764940965201 -0.934251345777035 -0.931151132002701 -0.0108285443992914 -0.678499926936869 -0.90436441917364 -0.896784742446914 -0.929668117251294 -0.981021822647107 -0.990055127989333 -0.986059528139891 -0.985980803841684 -0.954435624065542 -0.977912669478039 -0.948148770467601 0.978090577117456 0.992304719251985 0.994687722839855 0.984034689898533 0.993685017857071 0.995168836483346 0.994178969132227 0.981471148717936 0.995410495167785 0.993825015379294 0.969203288009114 0.992542434059865 0.988850705925203 0.94724638434304 0.95240886753865 0.962511678336973 0.986561040507672 0.965157760592254 0.961615669411155 0.97723077736882 0.972387077426572 0.95965089476307 0.976823147880826 0.969664278274943 0.93900119775663 0.918178391643391 0.959431020800581 0.877326012755771 0.794882311501709 0.911600539589309 0.852338171010843 0.831971735136181 0.803888252071639 0.911744474039919 0.270356373602666 0.29568124179998 0.62504153129053 -0.405665800488108 -0.870256803851596 -0.659711737255488 -0.606347081858027 -0.950894228491559 -0.927775166141922 -0.687134823216435 -0.728814592190356 0.0937883463399141 -0.249604080408591 -0.955314494509282 0.476105996025008 -0.936389675302312 -0.973173549492748 -0.928686238326314 0.985847976116069 0.988091053456908 -0.994409828917956 -0.893234843154467 0.0662526583952051 0.328769246466643 -0.881128211967374 -0.8893573618395 -0.695727018261063 -0.831233498675617 -0.820467102077482 -0.62842893888563 -0.65364706217432 -0.210538292633642 -0.0290035335781222 -0.41682049611573 -0.136120761713209 -0.289514454086731 -0.877825177290687 -0.0362284608540453 0.835569948740703 0.275434496588011 -0.0485921261734041 -0.0913417644421424 0.140231048903354 -0.0447588365855035 -0.075884304617477 -0.407657135299729 -0.69646468284888 -0.398869544935161 -0.28727499755605 0.757032035346296 0.913005103456184 0.983858166615388 0.983825013413609 0.919233003137907 0.0567161533815615 0.595122934038835 -0.965953411083743 0.599084935753864 0.992279106646913 0.420982494454746 0.989280799650718 0.984539813732236 0.928463956743451 -0.00729370328304598 -0.118556065484371 -0.228892652089314 -0.350659090382399 -0.752886711785945 -0.822927855401854 -0.249995164750677 -0.769716293669827 -0.957761334279878 -0.93546226391554 -0.900533624833951 -0.949259779074438 -0.910168467619408 -0.954689044650218 -0.958170551666756 -0.935010299274685 -0.899375397253156 -0.945640701900113 -0.929726796277285 -0.815885794704649 -0.787090232496279 -0.784360506031378 -0.563657941782641 0.564432652883309 -0.11448352547246 -0.115160879286418 0.134664079291927 0.646520134972341 0.774833224798027 0.729870422637671 0.913846148812156 0.937049308108893 0.98847951318585 0.99298387330694 0.994450811686672 0.99653325299388 0.997929861202064 0.99878417020208 0.998638874779967 0.999032081550332 0.999154879612935 0.999195673438511 0.999235542085339 0.999041535045812 0.998791190574746 0.998305102712548 0.996883534185834 0.992936975259077 0.990852805128703 0.641959569129641 -0.975181877340662 -0.989963472643092 -0.994566701258536 -0.994158104747046 -0.988865284872192 -0.991596805561813 -0.946372717856247 -0.900180209376415 0.219816508618349 -0.683873505310798 -0.967950139488825 -0.972659658467473 -0.897584852283654 -0.976265553131875 -0.983194201107544 -0.99055061938996 -0.986731750836661 -0.977154710943465 -0.991539138561317 -0.964620314197446 -0.960172370445429 -0.988790641001236 -0.987536303511511 -0.984587877364849 -0.982693240162788 -0.986626128971537 -0.98858146625069 -0.981350739606847 -0.976073160653573 -0.986042953926433 -0.984602783470265 -0.971702816849282 -0.966122622844824 -0.972009379938367 -0.980132933000968 -0.952387840892318 -0.914917417010087 -0.970769391182427 -0.949542911640052 0.468511137418763 0.0792089431772135 -0.667510537782092 0.793486536723922 0.935245739980392 0.861738137986158 0.948862691867645 0.980872497063324 0.974037161194944 0.956198711582133 0.970283217043742 0.980576527384121 0.987024069686829 0.977089508436073 0.977385164105186 0.978407483892254 0.94682085460681 0.967783484385265 0.957255506209326 0.955231526391746 0.96813660023331 0.971673800713498 0.91836377261645 0.750883080519945 -0.513130651027039
-0.97266947661825 -0.963010378089103 -0.977712836675108 -0.954757956486241 -0.959186931155083 -0.975283403772173 -0.96227143978898 -0.879599924373613 -0.964906682059474 -0.96962858059529 -0.932188833837208 0.0867756448977072 -0.762332705509838 -0.922781713897352 -0.845123738898895 0.578445784329615 -0.827865396753738 -0.429749870640221 0.90518103737901 0.825447869088096 0.872444748668661 0.94466979634626 0.969555253160895 0.955936960623377 0.883916155768741 0.955140605475578 0.960955891911079 0.961346828698454 0.973176216304281 0.969685276715667 0.964432824869791 0.959575096488297 0.87737852311214 0.855576911261377 0.215374369419816 0.733619614028547 0.827892628042313 -0.94325407882229 -0.985624239681176 -0.989523582173201 -0.978479011940438 -0.851237131724548 0 -0.890394474885846 -0.941299409471379 -0.728846503352475 0.774520475475253 -0.934751510205349 -0.932422785622183 0.916281032257086 0.904920973591379 -0.974126704736934 -0.917781424914563 0.965270156390339 -0.836022519297261 -0.911635182949917 0.947931867443769 0.928082658753348 -0.615926301707745 -0.653484880369444 0.938949941497857 0.788341462046338 0.221476254927481 0.239087030971934 0.925763835253036 0.852000102450627 0.705206240205031 0.469609406453473 -0.575606209889039 -0.955982507905703 -0.98478967370969 -0.980282054282079 -0.980537406541266 -0.910513855544591 -0.967604856992945 -0.914394122012761 0.983127852774506 0.993257617950025 0.99474164763977 0.986130941287561 0.994012003793644 0.9955705932414 0.994648102381332 0.987471597552374 0.995798642518087 0.994777823043971 0.984790425794615 0.993365019587094 0.990829862551256 0.976377579920435 0.976373456738869 0.978935925636029 0.990496021527458 0.98291185949811 0.979968232310776 0.985823698995685 0.985688602515485 0.981486006888035 0.985631988923386 0.984427065551543 0.977713381847972 0.967362700055707 0.980264934196469 0.970037098170124 0.95860509305109 0.969265868730552 0.963112042191255 0.95150608825661 0.946309489887801 0.962689478655494 0.771554890640948 0.711741212313617 0.806345640748987 -0.534328482347595 -0.903265507581864 -0.564078484253922 -0.553620540507813 -0.959826573149866 -0.937916695018197 -0.646618821569605 -0.758117350981233 -0.0240810806685514 -0.274473360845587 -0.956198117945048 0.304381975489276 -0.944798787785263 -0.976061049886706 -0.928106501698273 0.984898589425763 0.989819964113333 -0.995285109700755 -0.939788471878716 -0.532306811763221 0.211581519574231 -0.833397404635531 -0.867957002217574 -0.626992801850847 -0.687497741808906 -0.301328869694713 0.424187593924921 0.191917389184461 0.533510025670458 0.666352033332741 0.464624238156316 0.613106425702925 0.466307650247276 -0.665958481721819 0.774591650471781 0.926123368210175 0.832933406830106 0.783511872995207 0.777263345135261 0.796242708117567 0.790759123760544 0.811160015241047 0.671898046819121 0.357466581423249 0.729758042197136 0.802899806808948 0.950436600894094 0.966110408672959 0.990814958524887 0.990469110178152 0.97276593726296 0.791833834139872 0.877210262843724 -0.943397784360875 0.852069367667469 0.993723608916258 0.841338497333749 0.992927353955419 0.990095009406857 0.959697187609404 0.740918235194158 0.828816944242861 0.816929159261022 0.755655514004325 0.159517941647132 -0.256091192505174 0.717875751514193 0.076094124567254 -0.93910461325486 -0.919596181203714 -0.879308586980973 -0.946487075779266 -0.873015495139834 -0.946238634269504 -0.961738835026057 -0.938737490158297 -0.888690959435551 -0.955425022788811 -0.947537432511117 -0.865768717433925 -0.850688068895833 -0.879015469654195 -0.789967330219109 -0.0381187995747161 -0.71493154040711 -0.720568411764018 -0.576457827276404 -0.103375202290196 0.17393167235715 0.175362263949187 0.826496161854501 0.857188535652044 0.978797262841186 0.990273240083354 0.99261154918394 0.995327245439956 0.997897838026212 0.998825228923781 0.998687588496154 0.999062879566864 0.999286277976385 0.999261240095016 0.999328417021428 0.999193457652707 0.998857236891603 0.998258985136821 0.996993092689677 0.992607111923258 0.989290297052295 0.674901961742426 -0.977556272466718 -0.991573377712363 -0.994663887005304 -0.993829127677293 -0.988584607860332 -0.992265713717262 -0.818469080200372 0.618986983045019 0.887222391322572 0.336502343463888 -0.903167667605166 -0.922707037862578 -0.366831238330308 -0.960331668588243 -0.972882856708595 -0.989722209406993 -0.984593177566716 -0.950569258162674 -0.990033341180556 -0.871526664863221 -0.836532088778872 -0.986552787673591 -0.984271293181634 -0.978801757682006 -0.974453487367341 -0.982320076706553 -0.986520372950601 -0.974958938826452 -0.958892019199572 -0.982534495877844 -0.981271803897895 -0.953487928826173 -0.933177650943036 -0.957943800981727 -0.973498500841421 -0.882747341600691 -0.660680627625655 -0.955010557635779 -0.86381104586781 0.746110148837337 0.349319256078946 -0.381377804792719 0.78247865804352 0.875423593010422 0.543074811793477 0.735246211218834 0.959982713023376 0.952613281011893 0.920825910525212 0.937057179663604 0.953490236066923 0.957584158332119 0.946107952128079 0.944784694045691 0.955454514747474 0.831117938445591 0.930749059008094 0.908784114040935 0.922095941856628 0.952111029975257 0.958926242763158 0.869578073371037 0.194862010824755 -0.840745179380371
-0.97791996991212 -0.971994987143874 -0.980612794168285 -0.964363178590413 -0.967722581782584 -0.980053279650152 -0.971314915887225 -0.928208381445289 -0.974169236433661 -0.977993411054001 -0.959002948979944 -0.72027407228635 -0.902116139416522 -0.951226296196434 -0.926852022271483 -0.545244571585554 -0.926263765547489 -0.860597651469537 -0.00570441772336823 -0.448259144478602 -0.0342348994991424 0.382787964146184 0.738884289995536 0.549625898348921 -0.158518011439727 0.538721806881154 0.356537459143315 0.313254600313211 0.672310711367281 0.790522348823229 0.778789090172879 0.754529559734567 0.610789973076395 0.50208839791644 -0.550133169391311 -0.457921897651135 0.582550765280843 -0.922926643417563 -0.975707227761663 -0.911066048105704 -0.939025397575336 0.904923569256074 -0.890394474885846 0 -0.660494875614231 -0.806679342365072 -0.746033998612725 -0.961272593289162 -0.973026361413695 -0.401385783317987 0.0203512266207849 -0.974634378466991 -0.96459918477877 0.752156395114262 -0.927913017163036 -0.958296994778251 0.483252146361775 0.590829255890641 -0.880176608548941 -0.922525870767463 0.572481816923288 -0.146684110181366 -0.788640827716129 -0.80539864932425 0.600806724752923 0.0991939449359011 -0.576862108653616 -0.655473493993497 -0.849642522543699 -0.973151161238196 -0.986682431998918 -0.985339234568709 -0.986759223209392 -0.969801972296284 -0.981069856528547 -0.973487915355133 0.877145389741438 0.985625900741888 0.991422125939689 0.961690478295233 0.990950158871301 0.993610313392061 0.992358989841806 0.97691369649801 0.994652028180999 0.993135821271213 0.976791725056759 0.9920006308499 0.986729032657683 0.958873227892233 0.963585504109047 0.966282735851098 0.985863319598448 0.973641896360374 0.97090279733743 0.978456498579786 0.977969475715937 0.973775753451511 0.979802517415851 0.97650419584061 0.967209930950686 0.957086052198006 0.971911122375534 0.960903231340562 0.953933780378907 0.958322718411733 0.946762013561831 0.952155133131103 0.952547488955903 0.960684295200193 0.857429844177972 0.852015185625814 0.861153842303246 -0.483968309100079 -0.745854065402287 0.439132689109205 0.000915026511088867 -0.927186592074387 -0.750162610092504 0.547809161064644 0.226298786739535 0.753281345960152 0.656873325223094 -0.954857252037352 0.843611281854996 -0.868829112078326 -0.9390355733739 -0.700390720885689 0.989099456085542 0.991592116691581 -0.990674664726128 -0.88840731079537 -0.386007282202189 0.552038466076268 -0.395916577970182 -0.544686860624791 -0.229318255846679 -0.271667145841023 0.525410797378426 0.749842005503854 0.573567394962396 0.761699892251898 0.823354967832273 0.663670786890481 0.729885280665705 0.674689517790423 -0.278451319653973 0.822607089323262 0.932473823801351 0.87988031155176 0.84482657266614 0.800303073413956 0.824568989122778 0.834989775090685 0.822672880395158 0.660137792089843 0.434816751077914 0.761150120939618 0.799963976767308 0.935329317726178 0.960627958288103 0.987296470984247 0.985842567288061 0.953315658886923 0.560174426853626 0.827852722019958 -0.944934988061866 0.850867744886786 0.991487782479019 0.902724779877763 0.99165854788083 0.986701361823764 0.939799286536192 0.87864176544608 0.890322571196861 0.844180592471204 0.837282626742827 0.708549392632463 0.585610862211811 0.880857981606479 0.75934367476164 -0.760713480464443 -0.635018501215986 -0.339271860439141 -0.646028183094712 0.0576830164995185 -0.800163009869836 -0.913205999093194 -0.613576287378996 0.0820577639207305 -0.878610262815062 -0.810555113366065 0.203509831527328 0.112752726471644 -0.390321613050758 0.298887160692583 0.888266466123572 0.356641560942612 0.159353071223322 0.562465383457099 0.76553545898807 0.769333083194962 0.741644339349748 0.923426935315286 0.934065147275625 0.986830079865168 0.992481690889699 0.993768012713522 0.996192541642379 0.998018353689049 0.998841628613888 0.998686512035619 0.999065259117024 0.999321418259968 0.99931132066562 0.999367913815241 0.999290695787946 0.999110255549702 0.998696829662901 0.998619550304037 0.997012685674841 0.99540782911903 0.982397617816111 -0.912590662955135 -0.990648214050692 -0.994799432271749 -0.993512828663208 -0.98405295919893 -0.991791846864978 -0.613076965222583 0.94311925008871 0.976273255083077 0.807581267551023 -0.84458718717039 -0.778059081132693 0.438200142055405 -0.94451679032122 -0.969280145199814 -0.988564614030313 -0.985521378113523 -0.951124031017801 -0.988141787585386 -0.724628546221916 -0.62903693659218 -0.985687733118982 -0.984474411625165 -0.976659207432413 -0.971834165626532 -0.982545922249896 -0.986802446473888 -0.973808799470864 -0.956366241813438 -0.983187053798787 -0.982117129876463 -0.953693357231393 -0.93753408415491 -0.958474751087699 -0.971292835909698 -0.904308896004679 -0.780534290778627 -0.938680443403023 -0.845072861286824 0.199378062447213 0.218101458192191 0.124502920842045 0.365619942788565 0.62959181477041 0.368050647453059 0.696884546659667 0.884296630620892 0.884274809453861 0.861795789529047 0.898892615563024 0.921798872155398 0.902172518945404 0.750189585183175 0.768973942139484 0.836215262307742 -0.0825942397591155 0.357530832418514 0.290481248994858 0.627257721936416 0.751729848074572 0.823445431010326 0.18966338053493 -0.732460503111481 -0.927485022131011
-0.984043055623073 -0.97943362907513 -0.984009694233465 -0.976909034603186 -0.979160334958851 -0.984401207847357 -0.978789351696136 -0.963398976700699 -0.982545125673759 -0.983285378855837 -0.974025330388668 -0.935758881380549 -0.959168664296838 -0.972717223980508 -0.970540615784161 -0.939716771830618 -0.97022999718805 -0.958020325030275 -0.906049112131243 -0.894245537210426 -0.796100288500362 -0.757761676305406 -0.0297103772520887 -0.28422100857444 -0.850907166163471 -0.479647412596734 -0.436486718685154 -0.471460322123616 0.0245401037068492 0.286833038809607 0.438700990597708 0.242979130277943 0.370280185153976 0.200990812233001 -0.642607372991449 -0.31208020167325 0.536837999864627 -0.942675857591048 -0.978423843519154 -0.986515888768098 -0.983411749569407 -0.726526232181681 -0.941299409471379 -0.660494875614231 0 -0.792398966002768 -0.856112058068781 -0.961643078193698 -0.952796543042265 -0.931194680518206 -0.906307409411641 -0.982641795298383 -0.979574136243625 -0.923604103030247 -0.982469742485127 -0.98005338233606 -0.956005687216525 -0.902695749973979 -0.969533078379543 -0.978398346315316 -0.929809451404287 -0.940055335789777 -0.962575926958883 -0.964527969256281 -0.84927203397178 -0.902018666367915 -0.95421685205136 -0.957129914065171 -0.960896867090941 -0.985945721013646 -0.991269140327186 -0.988840274109269 -0.989399047050339 -0.977150729801661 -0.984037947811504 -0.974963477130829 0.918296678666366 0.987719909927047 0.993177037036837 0.973492163677019 0.992128599058214 0.994287585314207 0.993565485201586 0.976727185254093 0.99475396507336 0.992698434332976 0.958157269491349 0.991472025486529 0.986439107170154 0.931367876333632 0.941745751287584 0.94655903588954 0.983861426158178 0.963666721940769 0.95770787931915 0.972824958921141 0.972290936752931 0.965444962206239 0.976127729596284 0.969513822408579 0.956161725844802 0.943250157139437 0.963606333352474 0.935081969576063 0.932178796408533 0.951001441786088 0.914107165478052 0.936834972390567 0.94718208562012 0.957439151261132 0.830677474880625 0.863652321963365 0.887021507795229 -0.532692922301823 -0.708665189390066 0.562952795808874 0.183235076721344 -0.929303723723471 -0.738273132826775 0.612567901812051 0.255924160978113 0.808772093719152 0.76527251755639 -0.960057960494691 0.904170792870525 -0.721235799843163 -0.816454799069605 -0.664585937235537 0.99002044865339 0.990176429541531 -0.983009027883841 0.0404879654362946 0.480416882084403 0.566405404074088 -0.373803982055825 -0.508206097742349 -0.520816115645103 -0.510254531080931 0.547793816483059 0.577795226150099 -0.142831617019951 0.572955419553383 0.759145721229414 0.426301104718547 0.497481698369254 0.511799703340215 -0.655531801604009 0.642530592660309 0.905363631883436 0.774100272272923 0.671933259540114 0.489163674858035 0.618903252168079 0.649333542481274 0.57635699966272 0.0860568968258067 -0.300559237365503 0.418077463663871 0.474592448794076 0.874795219270958 0.935653440577344 0.984155266933324 0.983458886520865 0.93372738805787 0.269264546101459 0.767746673247189 -0.956258739420382 0.819736803942004 0.992204934553442 0.861199313218819 0.991574616384292 0.98729523882289 0.948379166411801 0.825052911456705 0.823995324674813 0.748782933847995 0.761376333189022 0.563369319656565 0.308767378945366 0.837674754705811 0.693172149430001 -0.804047469084294 -0.684622277442124 -0.266101373863029 -0.598890554619016 0.157362014937918 -0.715741675574537 -0.885861092617455 -0.433133291142074 0.496042115469575 -0.801712766635658 -0.674726684669069 0.534692598233285 0.608788535721218 0.203897182215787 0.596771622627083 0.933723257258473 0.699498578310809 0.509802489017282 0.736149114612907 0.855154647959845 0.857603262018969 0.806396231029213 0.936091066420979 0.938484990284136 0.988602673529069 0.993271360735262 0.995020831990592 0.997230632260667 0.998222676576726 0.99887492587581 0.998671203548518 0.99900364801546 0.999249276084125 0.999227705540827 0.999269453161144 0.999159493329267 0.998999056643941 0.998751293201057 0.998812649454153 0.997527397183568 0.996381303121251 0.993113538076769 -0.0668150947368527 -0.987864409085346 -0.994563952482926 -0.993209035731028 -0.980466368667695 -0.990357964212339 -0.740400604325513 0.904496222659578 0.973544031844722 0.757755982321164 -0.908316877707848 -0.871383386231444 0.122251146566363 -0.953403122185931 -0.975354628489634 -0.98914721211366 -0.986072834537116 -0.965927507456357 -0.989464142784658 -0.907012733973173 -0.886007721291019 -0.986947431722303 -0.985927959691704 -0.980289539575657 -0.977877544476148 -0.984894052995402 -0.98751501189352 -0.97758030292504 -0.969095270724591 -0.984710935463214 -0.983291807819622 -0.965883568505239 -0.960007005418737 -0.965794589746283 -0.975802672859767 -0.94963203328268 -0.911730505350667 -0.954183804301558 -0.9259207925754 -0.0196555907609464 0.544404710872814 0.599071661351894 0.63613288857762 0.867121913052566 0.863815584156293 0.955686332754239 0.96635007621117 0.962204652872562 0.945355147118199 0.958447355423841 0.964925341859178 0.967406760084613 0.89505995705719 0.903656746323893 0.933508212337796 0.288556050363385 0.645135005993057 0.65765725276221 0.793967250525077 0.814526485696989 0.855012642761957 0.600131135637651 -0.693569201040605 -0.930380134902079
-0.980495806582185 -0.973531383127173 -0.981346062123372 -0.970221555615927 -0.974354838533434 -0.981454541583104 -0.973243014471593 -0.947434399457504 -0.978835374070292 -0.97939094325748 -0.964917182940317 -0.862395156112553 -0.92976187011674 -0.962403131757944 -0.958604652858457 -0.85842621638324 -0.952480271034973 -0.920902983361399 -0.534032787255123 -0.584723303371359 -0.0681421249110951 0.55590545761524 0.768087666596899 0.522138455826831 -0.528102792379978 0.150331814315959 -0.0741856384741966 -0.314594441580699 0.351759117027067 0.321896310036111 0.127526981877166 -0.348732505106275 0.20936980769596 -0.178873221043308 -0.731927512595108 -0.313879543387965 0.147488393234195 -0.964700045328585 -0.981086742943949 -0.988686528006647 -0.977752442169371 -0.550090152329488 -0.728846503352475 -0.806679342365072 -0.792398966002768 0 -0.871844187734894 -0.831556015984994 -0.932211450328446 0.596359971158329 0.516025194330172 -0.987250965916301 -0.969804108695819 0.672018665037102 -0.976850818580104 -0.969794776074748 0.00222988682473251 -0.351878944224266 -0.952193781585887 -0.949302654455448 -0.393628501415698 -0.79416961211494 -0.855239532623032 -0.88436036044096 0.267665001938052 -0.219484294366647 -0.718405519037698 -0.846744892480664 -0.920622593908319 -0.978744551449353 -0.989722268249354 -0.985625454040902 -0.98520950585463 -0.945171223291318 -0.973671070118617 -0.93177230140278 0.984910868782417 0.993759684330645 0.995362233783915 0.988712163734752 0.994597500140854 0.996081824632086 0.995375792252701 0.989303212102177 0.996135351599602 0.995144833880159 0.983515748392551 0.993421430951812 0.991447122958748 0.975738171009631 0.975553465739933 0.976529620735179 0.991073392787588 0.984635436251807 0.980792089750161 0.986254281340914 0.987527237620867 0.985116239874546 0.987450201278752 0.986186672563085 0.983842640858092 0.976651042984592 0.984087742041352 0.979433499858994 0.981408857822219 0.985657296793987 0.982381572868029 0.981258605433172 0.983720548967397 0.985045864104741 0.947929515639392 0.935985170390145 0.930672522226061 -0.284119765490622 -0.826251549494248 0.349014185437046 0.302220284605781 -0.939809590523731 -0.885942770172189 -0.00913530826853786 -0.433133549980686 0.551512756256846 0.52714410023804 -0.945892147361301 0.768152650222251 -0.875820348073437 -0.93900772596733 -0.856373272307448 0.989422004425481 0.990189352583446 -0.988621604737502 -0.0472738874508498 0.331226516044491 0.501321367880559 -0.289825578314291 -0.345840012237823 -0.452676895863708 -0.275631842377686 0.841117680856712 0.889115058846663 0.471875327733762 0.753311869947324 0.866766344308016 0.756420603979077 0.755396477595829 0.758260163113526 -0.329476458277689 0.855220697306717 0.936065671028455 0.877292274316439 0.845228710703907 0.817502712025544 0.83284657256365 0.852399169797036 0.858661734630576 0.733966689603889 0.521356962750079 0.833974064410961 0.863194262408242 0.959864643191705 0.966358894035546 0.991370576171555 0.991430344206619 0.97838797007957 0.842648543271905 0.903356533784597 -0.928471864139521 0.890490962978214 0.994357306483712 0.888282517116951 0.993921035846494 0.992083102973475 0.972889859958651 0.865207668137302 0.922529113373013 0.9234778338841 0.911266785421009 0.789453632746148 0.565680950566772 0.900495127468326 0.841622840857659 -0.847919068338818 -0.838432465963605 -0.659497431901138 -0.877367399764833 -0.449688766915139 -0.836805520847898 -0.942966617310349 -0.87038031232529 -0.535472560092745 -0.927784674944108 -0.921335380214897 -0.684674078187647 -0.555632071451773 -0.782121211382575 -0.636818224667982 0.550795682281584 -0.553178553183679 -0.693883750217948 -0.470229172535408 0.0936717045451361 0.191547898134092 0.0120500565618386 0.826830532454269 0.803838591616173 0.975845696162675 0.990046746316173 0.993444437010303 0.996323218949594 0.998197790326656 0.998899621669463 0.998643556402494 0.998974526162126 0.999355236075579 0.999266300573617 0.999312013687291 0.999222964894268 0.999093440236042 0.998767424406342 0.998805143343607 0.997190409537869 0.995587736697624 0.989035352407263 -0.925051521298993 -0.991794612730816 -0.994833334734145 -0.993183763166802 -0.984790501954579 -0.992162364738963 -0.200374177914008 0.961195313389796 0.971397211546122 0.846220936747373 -0.647572829034964 -0.611491820686615 0.731699286504822 -0.928309491696309 -0.959136470496964 -0.988889265142159 -0.982595879157877 -0.913584087972681 -0.988989028690153 -0.771542252940491 -0.715472258316127 -0.986283026277595 -0.983285418298825 -0.976331687600705 -0.973904115874951 -0.982318190595468 -0.986203711786798 -0.97432290481583 -0.960377461510121 -0.982718230384962 -0.981038034361589 -0.956943756639428 -0.944615649153866 -0.957944579096402 -0.973827346935286 -0.927429749837518 -0.840768503219095 -0.951546353627893 -0.90684563960199 0.401041727067999 0.56129353650711 0.510026901463226 0.709006428197725 0.862771896264217 0.766399102807046 0.932167281764161 0.969148307252543 0.96717285904626 0.939590355380295 0.942995161891114 0.934710619316287 0.889378328011782 0.750204782219956 0.800790506701659 0.847168920940854 -0.365190785667327 0.391236568371183 0.289918495386402 0.638541836534093 0.697669299814239 0.7706443264502 0.578277032022286 -0.771636535400947 -0.930590757718721
-0.964168355929606 -0.947319495633717 -0.97029116271612 -0.929626016589903 -0.938279066366318 -0.967061995942816 -0.947859483200656 -0.813515737304047 -0.956885887731242 -0.96415774743963 -0.920325642367248 0.00379828535469222 -0.738745578198784 -0.885255517985198 -0.842638977770304 0.114216622412315 -0.856212324924272 -0.617878246771821 0.53206516097738 -0.393777756004163 0.370243106470431 0.748586363438993 0.81405936294824 0.458082633537538 0.0108699550579828 0.43698360554884 -0.413845717419713 -0.671671362827396 -0.104260312563158 -0.124570731297522 -0.454589610316811 -0.732837157111872 -0.000107456928806065 -0.227885312969886 -0.74166138632363 -0.630117683907666 0.220166245995172 -0.966673536835025 -0.973285727088722 -0.891821596760578 -0.941008135835212 0.368381370733145 0.774520475475253 -0.746033998612725 -0.856112058068781 -0.871844187734894 0 -0.963786533048812 -0.950556120755243 0.904243070091046 0.958453584201277 -0.93580740576387 -0.0456627471324455 0.976921951419552 -0.432163251395746 0.391105453418536 0.974698722359097 0.943057160556745 -0.106105793918151 0.274709559474424 0.951374773737272 0.823177314734389 0.705694145440269 0.563377350204861 0.921726958263192 0.874702462068591 0.865671840074459 0.492797395651221 -0.650045162380618 -0.958547544699999 -0.984554378976164 -0.983226718284558 -0.984427832845145 -0.953785912265336 -0.975600988428156 -0.96031577181605 0.966704337675599 0.991976069853742 0.994296778264554 0.982568149030105 0.993751976447478 0.995718777091928 0.99469261177247 0.988307553496074 0.996081107369186 0.995309422449423 0.98800291314807 0.993813199024251 0.99164087844333 0.981299698341626 0.98141269512722 0.982149785060246 0.991916146399328 0.987215594317501 0.98476269458444 0.988418736657686 0.989358612759693 0.987738319672637 0.988970306920607 0.98863134052501 0.987006825601486 0.982145087550474 0.987365898711721 0.984395985493449 0.987277816767625 0.988838550092361 0.986990051881288 0.984048357331011 0.9860599975419 0.98075659977887 0.931946619612698 0.920569768625358 0.896798109858879 -0.674388995332616 -0.833464818686161 0.373625864953315 -0.00182413203260342 -0.940510029236953 -0.859634241518812 0.25180587671731 -0.289942071933059 0.58054075692932 0.545658432477786 -0.955696955522649 0.788136634681652 -0.879294116453179 -0.939922415912633 -0.784875358186483 0.988874538186351 0.990164374035472 -0.985491576551712 -0.704811559412113 -0.484864882599976 0.359437474707268 -0.0845069047654012 -0.253501171500075 -0.319116862983267 0.106863425889627 0.934437184835765 0.968331774029117 0.888363784284724 0.897754838302415 0.939592811703886 0.893469392340314 0.886381162808747 0.877173207849136 0.606546298899681 0.934561873547498 0.955781583715355 0.939910048404408 0.932548101276862 0.922485554185436 0.919262752840197 0.932980937284894 0.936543753682668 0.89873821065916 0.854947271717073 0.932720938579638 0.943010199266542 0.975758499030251 0.978563101700986 0.992433191022301 0.991947882458801 0.98165575709607 0.87908138866499 0.92084783627659 -0.891481343582057 0.912207020212259 0.993675126162558 0.939941368544424 0.994050593388418 0.991725202510039 0.964736980790243 0.930914597644896 0.959764190240677 0.95428912986598 0.946433655315505 0.911814946159791 0.866973225836885 0.945136355722796 0.925254302293468 -0.405350627991009 -0.534148826633292 -0.190740054675496 -0.585208336277797 0.32703784412855 -0.650151695145224 -0.925511567846737 -0.753993746538037 -0.0786381461575459 -0.91298010125099 -0.905421132504645 -0.507105771198817 -0.451471056346274 -0.777957412847022 -0.577438176520672 0.63361007337134 -0.582343088387302 -0.7197849783791 -0.437029758112423 0.0711161996399296 0.0356560681479037 -0.0506362765561429 0.824950599678746 0.807091875613848 0.973479353705663 0.989131786950641 0.992251831126457 0.995344252983997 0.997990563195228 0.998761965408738 0.998535345532229 0.99892916431854 0.999324402440966 0.999201073469466 0.999288388186382 0.999211875572664 0.998969131632487 0.998636983116712 0.998734045375783 0.996834787330986 0.994272100643024 0.989567706360416 -0.843115836493699 -0.991411035263065 -0.994560821120438 -0.990669883504841 -0.975670793055445 -0.991061417313259 0.754867744083978 0.986324588996318 0.98570957004223 0.931461688706118 0.679433617526536 0.822699385891361 0.933075664843667 -0.737151419026041 -0.878413426637077 -0.985700103778074 -0.978779399626818 -0.500217515370141 -0.981971549748137 0.781627440967447 0.829819713695692 -0.97712792916263 -0.971136562053306 -0.944088791126516 -0.928892964406523 -0.965455981863981 -0.978653973239328 -0.945289119467622 -0.840920770111259 -0.970851724574331 -0.96951318976268 -0.862438899119992 -0.817864624185798 -0.905370828400423 -0.941583776192249 -0.689590890838505 -0.172596352844547 -0.763191363646812 -0.471364029247374 0.489176421132961 0.524877872214408 0.620889250880028 0.422287980401942 0.447547851755239 -0.0554975713246028 0.272791003418067 0.671550889060967 0.857296334109336 0.787845901007822 0.766596528952083 0.569846270950105 -0.173201064958737 -0.428411156638348 -0.176251556792177 -0.283330264235568 -0.808156283947606 -0.586941995254708 -0.682959030218773 -0.375144946449238 -0.0809517528992481 0.318044238543024 -0.417235870307442 -0.892620808524834 -0.944301363686744
-0.972545343775667 -0.962572179058604 -0.974591236913132 -0.948377100927549 -0.954168721043924 -0.974000311714535 -0.960251774041346 -0.888540382167076 -0.967389128775897 -0.973311639745172 -0.94641993739226 -0.652362285610444 -0.874166412516717 -0.924330283025948 -0.909096789764461 -0.619911391031471 -0.91126347603183 -0.827347950992693 -0.533497415941152 -0.791287153662951 -0.317932082720779 -0.00459813224134343 0.12564484900207 -0.444917125985906 -0.58694992602046 -0.513239716072126 -0.732323741557957 -0.827459715673219 -0.631156471500447 -0.577142089744298 -0.646925600369921 -0.765465424392862 -0.144120646545146 -0.222278487665071 -0.745163553174574 -0.745820075532236 -0.00376094840887565 -0.956052236120305 -0.971028715379795 -0.950918340904523 -0.984653408595807 -0.94018563571756 -0.934751510205349 -0.961272593289162 -0.961643078193698 -0.831556015984994 -0.963786533048812 0 -0.896505555631819 0.95087792812933 0.930958776096277 -0.912398421394081 -0.560836626168353 0.949859700415647 -0.949341415209777 -0.881627878952856 0.898792434482275 0.851798491137938 -0.823714827110661 -0.908057587886235 0.624399435011526 -0.160052300911498 -0.703348620378872 -0.804747359571696 0.536592621891294 0.191040810147199 -0.370358178662669 -0.754112579137322 -0.887247854019903 -0.979091592374894 -0.988957173345743 -0.987511417504231 -0.989066880074013 -0.977131900237889 -0.983623034366251 -0.978834074028253 0.817160049022084 0.986562981094479 0.992758123106622 0.971916873222076 0.992660347105961 0.995100027323906 0.99414671131589 0.986077998933544 0.995797079206702 0.994787393822871 0.983513162442541 0.993448587363316 0.990873395343581 0.976909810159948 0.977228465809789 0.977810271639758 0.991249907011404 0.985337174103557 0.982710319115748 0.9874045227622 0.988453457361079 0.986759101507057 0.988546239721127 0.987867824573126 0.985912808583662 0.981992807353776 0.986722509342295 0.985814186225094 0.987329495584122 0.986267938883482 0.98210647445939 0.979238069698208 0.981410830774962 0.966078847016142 0.888768927472946 0.874381497196007 0.785306013674207 -0.835730466008741 -0.794048007820792 0.213915505104897 -0.522334932098693 -0.932825849915686 -0.797582654093014 0.223054694603158 -0.368228498634891 0.493071462079195 0.467282159143479 -0.967510799766184 0.864064897016222 -0.778298132005733 -0.816964528502185 -0.677590778387293 0.988281652832597 0.987917317002293 -0.973008919981881 -0.663646202447976 -0.72496997362698 -0.150219799972794 -0.15699921476304 -0.304874833366241 -0.551473532392818 0.0795071076543016 0.950906843541973 0.977887727440403 0.900895728497346 0.901740708331758 0.950572483612889 0.910128515935245 0.894832935122645 0.890622812585809 0.710259071220928 0.938570857425215 0.956802618038264 0.942104661290206 0.936497672220631 0.918189633718388 0.915736305135445 0.9329882729623 0.934113877468909 0.878909532122892 0.824930575999505 0.925260780747603 0.935670258136406 0.971586227746848 0.976102175857537 0.991263945345647 0.990603975027201 0.977124940047502 0.853949285424416 0.927169260077597 -0.902199244291177 0.927764589288596 0.993101981766395 0.956025153054695 0.993886315094213 0.990729111391218 0.961616929021181 0.949218943737135 0.963244216052367 0.955037900234192 0.952005773073403 0.934879759586831 0.91577855599449 0.960359901255593 0.947541590328036 0.389886335753748 0.286442226695986 0.60036869236564 0.540115554887885 0.776487540522964 0.0809304971543319 -0.817043143575109 0.0977692081513716 0.716283389451389 -0.755067447873633 -0.68044732265238 0.405145059359378 0.408660094591787 -0.257470133140118 0.166290308139005 0.874053147574782 0.160938887811116 -0.24288272840641 0.310575263962072 0.633918187533175 0.57485153233677 0.433968330735549 0.890760604760727 0.883076580510213 0.982042046530137 0.991113554051795 0.993775797913828 0.996565228692863 0.998168407024393 0.998838615203445 0.998587476447828 0.998918115314207 0.999258405064197 0.999196800127119 0.999233140268153 0.999072216256667 0.998902292805159 0.998700302040955 0.998817236863184 0.997426967629556 0.996166225322019 0.996359679616113 0.950236123315399 -0.987123922592862 -0.994287421450648 -0.988871249745954 -0.943173260011241 -0.988753033100756 0.869774979526153 0.990369871025061 0.99161339939497 0.9615811708061 0.703016003399784 0.905086455567396 0.948902264609395 -0.630286829111552 -0.899057057792439 -0.984656650812368 -0.981218600182689 -0.770063917983858 -0.979822387378079 0.761978660040079 0.832658810989204 -0.975280491956908 -0.972534370195798 -0.945708780832484 -0.930746190527777 -0.96818137216692 -0.97972534051547 -0.945903005746197 -0.847498822329499 -0.972564114863422 -0.971244834145026 -0.868827853785354 -0.837087084385818 -0.899599781221782 -0.932337609159521 -0.748696215677645 -0.187897112455397 -0.356287760166596 -0.0814222731633685 0.576892516624258 0.81820102657273 0.881871978865766 0.668768831531551 0.723404142447181 0.700208654915017 0.878140166694238 0.839486147847013 0.9120618954546 0.896783490010734 0.879254559233727 0.823562662865592 0.374886868167049 -0.300498149589632 -0.0456311826181424 -0.0939673565389793 -0.812664637670245 -0.628167076838795 -0.706265993784607 -0.443567918870402 -0.252642940392696 0.163157477525025 -0.539272929543944 -0.905812030663184 -0.947028303324328
-0.981280521326854 -0.974568462168762 -0.980634426371236 -0.969854865279549 -0.974465015787492 -0.981584877170972 -0.973479004478922 -0.950607991216154 -0.979827326470832 -0.980887959307288 -0.968612896078799 -0.90492201933234 -0.94173518326135 -0.962028302220528 -0.962975233435917 -0.917768680834462 -0.95524232694242 -0.938563594816976 -0.913176200649026 -0.886186954570721 -0.726805761417691 -0.808460520289954 -0.719326230500722 -0.802431887697413 -0.877075888209725 -0.822914743490151 -0.830667517750954 -0.879537452249921 -0.690888960633891 -0.681583772622516 -0.738461372287325 -0.828039646004803 -0.219082993950896 -0.440196364722067 -0.810934721969444 -0.67948393397607 -0.146587214655049 -0.966026949142093 -0.976701604915235 -0.983642364461492 -0.986088530177763 -0.921639440286176 -0.932422785622183 -0.973026361413695 -0.952796543042265 -0.932211450328446 -0.950556120755243 -0.896505555631819 0 -0.936214313071753 -0.975439619024572 -0.992493960741559 -0.984272597195738 -0.97296737880638 -0.990661065044757 -0.985571200163736 -0.950166246227832 -0.933414558509911 -0.97535837334313 -0.977054399498894 -0.931973180007532 -0.952855362627741 -0.951353373513907 -0.955404697765992 -0.801177190868068 -0.857874869174831 -0.924053767017524 -0.950296976758384 -0.961024396275782 -0.986324120233619 -0.991698559997215 -0.988368913121759 -0.988711432519765 -0.969646189538967 -0.979486239264591 -0.961318365887348 0.973818106497996 0.992302633019218 0.994993700487473 0.987349332053659 0.994379457517231 0.996024788915615 0.995464577922432 0.989642236980687 0.996158222264869 0.995173648366597 0.980777260813274 0.993382294516079 0.991697955661557 0.975493624899829 0.974586783746459 0.97385661552723 0.991357285217431 0.985763993337549 0.981488265830454 0.986653213126078 0.988647189045963 0.987025002430938 0.988645447799321 0.987423506284954 0.986649431840162 0.980223320136238 0.986461068764973 0.985519704032105 0.987328582609175 0.990679174904341 0.988355663223394 0.986912423489381 0.990527473224793 0.981861105321549 0.908687407465921 0.89529944123799 0.775695342958585 -0.894194229102467 -0.877372215236675 -0.189631447245934 -0.59087656172156 -0.951511513713408 -0.899117899854944 -0.324882320723397 -0.678492268797927 0.352084123787819 0.387955315704036 -0.970543042507894 0.850250887669903 -0.791861389943443 -0.83082895226392 -0.83169538867706 0.99054208297896 0.989982514068035 -0.981920988980692 -0.081753011425908 -0.430776236873522 -0.203918611761088 -0.352392440130361 -0.416639872749824 -0.692191393889014 -0.314742492768293 0.902811822324633 0.928514853010909 0.288891818695212 0.602888444778465 0.905006816488066 0.851506696072485 0.782551556116656 0.831624184073638 0.23291142968907 0.896468673698274 0.940488957201025 0.906994987573512 0.894272920778787 0.853867738487287 0.86072948780767 0.896351155728662 0.899834484431729 0.79300136192071 0.669629751400281 0.894947486070582 0.908904458385621 0.967264855692986 0.969153660870628 0.991635682906944 0.991765403081103 0.981070856848074 0.879835916581077 0.928783498565792 -0.904903011859797 0.921036221614869 0.994247384395945 0.932547343557538 0.994233781818033 0.992407757568583 0.972806296083827 0.922752511140089 0.955213098017946 0.954149560017755 0.950785440440711 0.917323244692502 0.859191256590531 0.950385548345975 0.942238983973121 -0.148494469075789 -0.450022196734429 0.232901326071149 -0.141509080343329 0.578292343820898 -0.115919675642965 -0.88267776334016 -0.533810362477778 0.48908404285104 -0.843902770060421 -0.841978517132583 -0.216436038498008 0.088904492570195 -0.547054967005789 -0.383970364587332 0.792510162311358 -0.259119544769713 -0.605942205382212 -0.251595281440237 0.334294874675963 0.288004238850535 -0.050379457732145 0.8373606715491 0.787947438232229 0.975774995057369 0.98998906854107 0.993852002318329 0.99674255902475 0.998251078811232 0.998819358388337 0.99846420483725 0.998806755383778 0.99914311669865 0.999050558038408 0.999084995971046 0.998929135567526 0.998694201516179 0.998591515323371 0.99876322506608 0.997397750534109 0.99608295212384 0.996892796586928 0.974655635408821 -0.987180350569665 -0.994186701974352 -0.987870378516233 -0.944818202493082 -0.989366900009776 0.863787421230467 0.989951014460261 0.990771187419015 0.957639929613463 0.658334952739376 0.873581257727915 0.947223638524063 -0.725655535790329 -0.914948933994013 -0.98648535093015 -0.980748428689989 -0.803936374696072 -0.984727671951087 0.167426508575916 0.41339432208129 -0.981604913731149 -0.977775793812074 -0.962967626096529 -0.959846261628207 -0.976297394638027 -0.982636957491489 -0.962724337225832 -0.92839332382618 -0.977554055264593 -0.975683528191972 -0.928651546644415 -0.911721949097184 -0.926639796372854 -0.954610751177739 -0.892690692752202 -0.625211383407821 -0.641294859119019 -0.532814492548371 0.52033462673484 0.863317565661614 0.91771035025679 0.765486621963231 0.852056013383508 0.875519244323755 0.959091274103163 0.931678100053846 0.953713799088315 0.939837974937221 0.913831934325783 0.887358437601107 0.714329247283805 0.0445255044755189 0.379500425291609 0.466083052887286 -0.76791453638205 -0.42078079963971 -0.527374258718597 -0.105784645932568 -0.0227151944106867 0.34835198327692 -0.0443515596274821 -0.891497673453754 -0.942241142148788
-0.974877730423883 -0.962600349858784 -0.976229477926342 -0.95736079644561 -0.962299892703821 -0.975453162826712 -0.964425917976122 -0.920273292693732 -0.97271715961782 -0.974478881199084 -0.956800592021491 -0.785070388500591 -0.896005931772689 -0.94109356587682 -0.947879956027954 -0.831840966437961 -0.939463203767325 -0.901040139674181 -0.82258793470558 -0.88800036599004 -0.635228326049898 -0.630867671933468 -0.625957955917462 -0.820498963554658 -0.858908706413313 -0.803116317483594 -0.82015741903185 -0.891579096621285 -0.615510674218596 -0.660146403295353 -0.791217067493019 -0.881064315454638 0.00380737581321046 -0.274951476750751 -0.681454492531156 -0.115464880508668 0.604576274315621 -0.970465158752366 -0.969854225579339 -0.898084295229036 -0.955551917280304 0.0174839934336274 0.916281032257086 -0.401385783317987 -0.931194680518206 0.596359971158329 0.904243070091046 0.95087792812933 -0.936214313071753 0 -0.971219658157197 -0.991088902087042 -0.956049020877494 0.251471811411509 -0.974658193419396 -0.884631552333772 0.886395221833799 -0.657179907002598 -0.947045174887797 -0.861122108736652 0.171618458823286 -0.776801698265681 -0.462284862832467 -0.759459814919222 0.418481986207057 0.271689177997139 0.105405976516775 -0.770754020852157 -0.916662016886915 -0.975735026355471 -0.988884592684706 -0.985914416319159 -0.985511116239366 -0.952067962425619 -0.97436448068995 -0.945280235714636 0.982278952606147 0.993700897729031 0.995335812124237 0.988654936700446 0.994578981866867 0.996194110580703 0.995464838858011 0.990245454163657 0.996237353342621 0.995452510730746 0.987270605714608 0.993431722887112 0.991671214942339 0.979977247020763 0.979972719977666 0.978899086654175 0.991605461843099 0.98770255231492 0.984077614380407 0.98753620095815 0.989632903687503 0.988081429965465 0.988731641438704 0.988870169578216 0.987562621556407 0.978044127634435 0.985954948270776 0.974105306432078 0.969326235681687 0.990408595375133 0.986006653107181 0.970930579404129 0.986244660493297 0.958083878903395 0.716383757331894 0.724694949656096 0.737472499307829 -0.883712935178288 -0.921585912634654 -0.338813510948359 -0.287088719170991 -0.953703102256699 -0.923983789860776 -0.28028543947203 -0.577610278329391 0.446838728347139 0.447736947679988 -0.958386832566202 0.811137484503262 -0.838048489454879 -0.905014065754644 -0.809679114619715 0.990536385558782 0.990405502013373 -0.981796487930805 -0.148289854813268 -0.338299734620684 -0.00829809845765389 -0.198719712129945 -0.315050523104212 -0.634950473278408 -0.201911655611422 0.911715419114992 0.942846191389228 0.602500636528716 0.625851957468894 0.908871652683452 0.855998125842506 0.804152271695662 0.834690682948193 0.447490595690864 0.917837433759203 0.945331775985974 0.927749387236321 0.91668141292173 0.902839863083216 0.899259905536618 0.923024442779446 0.926864923456745 0.884073826223121 0.841190751757669 0.936428449460502 0.943840975416435 0.977330405045589 0.976700514070482 0.992990815740671 0.992904082792688 0.985191072480147 0.882411494504675 0.904563294285294 -0.898373151383229 0.877119101318714 0.994226328884781 0.891436496967581 0.994167293711121 0.992865043845472 0.961900129655562 0.871667732007075 0.960222236701324 0.957371705917889 0.94599884192053 0.903815988407448 0.826175034414165 0.921823147415313 0.915428453548383 -0.544967495570158 -0.815191971059108 -0.676507034412936 -0.800187470051718 -0.146835564119265 -0.615849748142166 -0.941058477883016 -0.868006187434141 -0.357950176888625 -0.933309276612825 -0.940550080967174 -0.797244361578295 -0.653610621885767 -0.866332852966379 -0.824033894394026 0.227292119242672 -0.795524156653883 -0.873568429128093 -0.780183956423822 -0.460651269661425 -0.520530692545409 -0.656951691868519 0.667296339056794 0.500128059959516 0.954467296859662 0.986607362279268 0.991982792884176 0.99538250088218 0.998064777929201 0.998543038942592 0.998168921369318 0.998676331720028 0.999048694092274 0.998803451451844 0.998970660573319 0.99885474205283 0.998378368227242 0.998405105340257 0.998698193773672 0.996410090243762 0.993360634696855 0.995319301455003 0.730640022785841 -0.991195958201954 -0.994189725216634 -0.982235320361175 -0.954576768011769 -0.990876695502143 0.905729486540328 0.991435371984004 0.988182796474128 0.94375486625158 0.921498801735005 0.957098693388257 0.968218895111349 -0.244888847248942 -0.596715090654009 -0.985866793674275 -0.975743620211465 0.537438321154193 -0.98012668496911 0.882139899904528 0.891038114020878 -0.975889454448714 -0.965823244310429 -0.930478991494884 -0.921253221262529 -0.960131387840647 -0.976157321807975 -0.942469525691551 -0.815045937651086 -0.966633216893609 -0.966287083487893 -0.867952144589256 -0.815122737932586 -0.879661451159292 -0.934269965903535 -0.781187307207436 -0.285246497735645 -0.420825481964349 -0.311048065034661 0.428985462367521 0.804923974313162 0.900897846154962 0.70021916593784 0.69004005991961 0.556842467052724 0.864143181181832 0.809766774368541 0.944080524148194 0.932078883711229 0.88946000877115 0.792546826474331 0.212559685153663 -0.355916616485379 -0.0180783316314503 -0.053813449370988 -0.7629907623637 -0.454698830550692 -0.568203459542697 -0.222783781597863 -0.0964765868381048 0.298825204885843 0.0557079423143909 -0.875227227403304 -0.93124069010496
-0.969433290349582 -0.955948397852956 -0.973038258075927 -0.942648809562209 -0.944014943312352 -0.971143436852877 -0.959036065530996 -0.877982318121445 -0.964122074331715 -0.972456051119541 -0.949794683041383 -0.661543689938407 -0.87166279423234 -0.918791965706375 -0.917933812818923 -0.699199710816324 -0.922224996611341 -0.874654821241833 -0.815560460632567 -0.923770245263803 -0.756086879717297 -0.731156488963396 -0.617047657079727 -0.833224655862129 -0.723023104333636 -0.686899042610357 -0.77460309378797 -0.872477419202596 -0.603458467723417 -0.601011990684327 -0.722884306012093 -0.823815067747358 0.249322556802697 0.222323683827877 -0.258378028259587 -0.0776251128160728 0.747848141690654 -0.949030037957311 -0.952239317800409 -0.322744849453786 -0.912660108832814 0.00936677566545904 0.904920973591379 0.0203512266207849 -0.906307409411641 0.516025194330172 0.958453584201277 0.930958776096277 -0.975439619024572 -0.971219658157197 0 -0.927656227942961 0.934449425809152 0.970180583583221 -0.964630944773299 -0.714475517197639 0.95783909878001 0.762798924617594 -0.932451892804956 -0.898689869657805 0.74854906867119 -0.421870978529476 -0.62085721941738 -0.805944810308052 0.522074129620425 0.266511425233147 -0.0476900756557222 -0.775400573617959 -0.910380059372914 -0.97994939966736 -0.988943948457261 -0.988630840900226 -0.989537106747347 -0.979704224916174 -0.984891520869746 -0.981624342622367 0.78038266687583 0.98822659374184 0.993535994416261 0.974335657183396 0.993235174232218 0.995781324131178 0.994595280603087 0.987400882595922 0.996186256290595 0.995420037465126 0.98726131928302 0.993659607364102 0.991488459040639 0.978541297349416 0.97932655895527 0.979272297306309 0.991641072972179 0.986428256999903 0.983463941647549 0.987448983589428 0.988752863130013 0.986881870083921 0.987926832023438 0.988368198304148 0.986264862708749 0.976802794122371 0.98511060920523 0.973901203451724 0.970976653531024 0.981949497225409 0.950466748122162 0.920973249103463 0.962483603316952 0.677222933545281 -0.168765656159788 -0.00868233343365863 0.105308666455501 -0.923449560449621 -0.924189541148791 -0.505509357906758 -0.638586205571261 -0.951226069633298 -0.901091504889186 -0.141160367227682 -0.490402836694711 0.418190510079582 0.360843408616108 -0.967863718840383 0.862508744336442 -0.765871855347869 -0.814934853582359 -0.630641106122733 0.989271103674742 0.988394411868903 -0.9659684422883 -0.538086320771203 -0.676032557336863 -0.312810847975833 -0.224992396982166 -0.42876657979061 -0.682526637243676 -0.180718542717742 0.911382580952461 0.955519276172584 0.800366672406232 0.652931354395751 0.915660199584063 0.856360464565312 0.833667915234327 0.83275916644365 0.694027374681845 0.934725679483866 0.951234732869497 0.942923670810761 0.935786501813199 0.924540214550617 0.918023183362442 0.936173153990718 0.935823640616321 0.900889275310376 0.872594885351154 0.94194711612381 0.947847498060527 0.976289542354422 0.978847457408731 0.992433044714646 0.991734248913527 0.97939493842598 0.747826236575975 0.858652714683044 -0.926138093619882 0.847180409096313 0.992894464535837 0.925086802634628 0.994050165058271 0.99157249781201 0.926602198531701 0.910489404942848 0.967431221769959 0.956927137434124 0.944565023554947 0.924707911290127 0.893541344181635 0.93764963914261 0.927706567375895 -0.125310051108901 -0.681977166562195 -0.511526220332917 -0.458540338125508 0.357619930934178 -0.41514682080152 -0.923354394215777 -0.715332160067127 0.248784450748964 -0.906909049930061 -0.909680073238823 -0.528978397206929 -0.331983311264326 -0.789711636640979 -0.676105673483431 0.679410258173239 -0.621347299593001 -0.799968787855224 -0.543111088213052 0.0210630678839278 -0.185843684294811 -0.401395919310102 0.797511950494415 0.740826797705563 0.969278135561731 0.988465664183977 0.992572712603771 0.995729005729986 0.9980442066608 0.998559511093728 0.998256947865371 0.998719540029502 0.999054856686698 0.998843166633999 0.999010548762367 0.998878094831806 0.998377088793678 0.998406209953206 0.998733320123703 0.996600708916941 0.993476922359717 0.996010650927181 0.962193463074463 -0.988939587420542 -0.993719933213409 -0.976730136601888 -0.903878275421469 -0.990029336913867 0.936414332935807 0.993962755045438 0.992934498241112 0.961471961546062 0.944735490412207 0.9789206395284 0.977402457505665 0.156616110182162 -0.462438864959104 -0.983933810499168 -0.979018442550622 0.498950955915503 -0.967014300624805 0.94509950559582 0.947226637450795 -0.961525122636434 -0.953159675461701 -0.881866583125837 -0.832223495849966 -0.940440327038346 -0.971986463179376 -0.915534049502179 -0.500448219775579 -0.959295068470694 -0.963022442835885 -0.78406722206328 -0.678859910883971 -0.82981444140445 -0.894116740873993 -0.605017878986874 0.0511222909680253 0.431353012328942 0.435860441219954 0.377612440320601 0.812868573668252 0.906228865300606 0.59848130637026 0.463019594988608 0.319306848136319 0.784382919463187 0.567183127102498 0.913956661499463 0.908581195897821 0.875716762333053 0.721743937384004 0.131404818250214 -0.371464646520848 -0.164660552534695 -0.248523323188381 -0.741366007035181 -0.545345823625234 -0.62081468854748 -0.366429193906425 -0.226501879951528 0.185089956049576 -0.257145057313645 -0.879925674558903 -0.929560820390102
-0.971060351706698 -0.961331986927151 -0.972242538420866 -0.942614649269267 -0.951512948371684 -0.972886347197716 -0.957744419815076 -0.887636747994663 -0.967885946252494 -0.974586982092355 -0.949200369996357 -0.778686655946067 -0.909818462905254 -0.930917831646391 -0.923877373997371 -0.822777291541886 -0.93226090145169 -0.888274824859181 -0.862255399342837 -0.906909622865967 -0.829392294301002 -0.615077901165121 -0.604140988521127 -0.907472366639849 -0.807691294192832 -0.655971853971503 -0.810141827956068 -0.925226942273227 -0.71044923334115 -0.667941847670229 -0.836841295171096 -0.898208059460434 -0.0572805249245976 -0.0364262460445523 -0.677820585105791 -0.665853615957 -0.0985601386028808 -0.963294894877551 -0.970311330312822 -0.974637540488615 -0.98948129729208 -0.974993851068808 -0.974126704736934 -0.974634378466991 -0.982641795298383 -0.987250965916301 -0.93580740576387 -0.912398421394081 -0.992493960741559 -0.991088902087042 -0.927656227942961 0 -0.987579116776278 -0.949862840697831 -0.987649737318824 -0.892793034147696 -0.302258521202827 0.923394779757457 -0.541377995527373 -0.944766737487342 -0.385800541438571 -0.479346744675545 -0.541792803982369 -0.87535218896159 0.259762493129709 0.426457919888907 -0.171009035296013 -0.87103404082508 -0.910417382700406 -0.982324760072801 -0.990749033620467 -0.987773599671923 -0.989344993852682 -0.975796978856857 -0.981507556314831 -0.973680654113384 0.92600016130235 0.990214958755173 0.994622252590118 0.986310715985672 0.994513566813587 0.996239918160383 0.995632514127773 0.992096485164772 0.996502512050853 0.99576173276983 0.987801836083895 0.994281211184212 0.993500960815795 0.986292114370379 0.985090028960095 0.984830607011903 0.993470176524235 0.990262278570821 0.988400355257323 0.990893612106744 0.991483779641382 0.990672573970424 0.99167146731843 0.990648577124161 0.989339397492143 0.984185061578711 0.989206798799939 0.983341343444162 0.969304964960065 0.979321355594204 -0.669540497883558 -0.782976778075534 0.494656676164051 -0.940629513383737 -0.9497446587687 -0.945898107610652 -0.938070344269372 -0.977509088030513 -0.974200810370318 -0.947979821529261 -0.95337302283984 -0.978987699982168 -0.969225224059384 -0.9217604737934 -0.936970777597322 -0.836109749848217 -0.834009374750441 -0.985006268353984 0.56019948273054 -0.878995778823224 -0.854070134347638 -0.887439034934648 0.987201219267076 0.983992721356501 -0.975507388948061 -0.815219742489917 -0.891263673904107 -0.797528587988417 -0.796620594124575 -0.873087925971609 -0.883213559560359 -0.679871327397835 0.630480052078978 0.69368660235314 -0.0686889591903894 -0.158081226696748 0.837916038113554 0.839432107020604 0.818754879838778 0.828170977063213 0.670924903327728 0.942257898333742 0.954563370144014 0.946029460639829 0.943354908576585 0.933699894794833 0.92852426994513 0.946863980836142 0.951328641075347 0.925240775589405 0.902016730915509 0.954453583153226 0.958992837206346 0.981600192481936 0.980570595876623 0.993233970492892 0.993085904673893 0.985580687996441 0.906930630941813 0.935620773577273 -0.887445726611267 0.913932058449609 0.993565121567887 0.941253341719232 0.994343085812015 0.992282855877719 0.945425461689944 0.910985404760592 0.968993018681473 0.962173143634433 0.945602500485826 0.915367501525631 0.856505898666822 0.916498694488502 0.897935093428751 -0.595272831882298 -0.884796587826409 -0.8155527929742 -0.788456522297655 -0.584415063614852 -0.790014911748392 -0.950292129729684 -0.886636299854904 -0.587664675107113 -0.945467257615564 -0.947051563035886 -0.864620251573711 -0.784853827464782 -0.9010439657505 -0.88645797275982 -0.0712871063187105 -0.85162072479798 -0.904178075979752 -0.838656752401238 -0.609358731227427 -0.683530081700342 -0.798085520159887 0.52652258472848 0.381397384269268 0.957077362699873 0.986271337677577 0.9924570848277 0.995876840374883 0.998024063354017 0.998464162033578 0.9980299964224 0.998570894786127 0.998684178006737 0.998551114150256 0.998808777333348 0.998563726730965 0.997708956264663 0.998156112087828 0.998428279857125 0.994981377655976 0.991896950114951 0.996039455747191 0.984952154043762 -0.985321415067359 -0.99292467179627 -0.967982726055593 -0.835302375123138 -0.989101281802065 0.929869220633052 0.994526287255208 0.994073883784911 0.963852319848048 0.933170871765982 0.981073561938872 0.977241334126547 0.0547107273767281 -0.633261369997026 -0.982850725158762 -0.979351740283183 0.0105558197248188 -0.967189672443145 0.922484439943188 0.930378944285696 -0.961218387664119 -0.957079178773463 -0.898906039904455 -0.868531972093783 -0.950812197738743 -0.973194113918712 -0.919813956078922 -0.672971493643942 -0.9642958205591 -0.965476108817683 -0.812973277844873 -0.780293613007228 -0.868748394963494 -0.897507423846895 -0.725133303276573 -0.311612474811952 0.491455434608525 0.379175486254641 0.253135117022848 0.793276296136991 0.891199522320424 0.333354434720799 0.296872240787652 -0.205679599054578 0.555926444858287 0.176459013363692 0.871676582129468 0.81440872337378 0.34317579805487 -0.0336755956764378 -0.714607903046704 -0.807060970197596 -0.6463393771917 -0.712889320514883 -0.871273188251285 -0.69924337441867 -0.7750984243477 -0.609408849251496 -0.407472957100882 0.052984740686995 -0.363895178480544 -0.899518981799285 -0.933568059974718
-0.970997076076809 -0.958140493839452 -0.972103878572014 -0.944075415865924 -0.952896777598797 -0.971556938204312 -0.955498419216436 -0.886973385697916 -0.9671580473883 -0.972112100444989 -0.942695629785245 -0.737289469518005 -0.894067813866012 -0.923547659377599 -0.915827687650763 -0.787923305375901 -0.921254865302569 -0.843923017813526 -0.723856583706906 -0.770352353895888 -0.713012203474002 0.541639642546508 0.175929401503671 -0.801551536774886 -0.262621393378294 -0.170904923296488 -0.511858039763228 -0.889125774737624 -0.377906748743619 -0.362075740503411 -0.790722081687338 -0.899222025766085 0.266439064479897 0.231083028790228 -0.448642070369084 -0.105682879841509 0.361299064266664 -0.968948483376941 -0.970992365828519 -0.975434342825695 -0.989830330227949 -0.961646109497557 -0.917781424914563 -0.96459918477877 -0.979574136243625 -0.969804108695819 -0.0456627471324455 -0.560836626168353 -0.984272597195738 -0.956049020877494 0.934449425809152 -0.987579116776278 0 -0.863120224971131 -0.17803163842808 0.951533439656754 0.943101368306927 0.947430440850943 0.71420994788467 -0.468074648153014 0.103195468020964 -0.242785098685984 0.798915149622543 -0.427425348010978 0.713166709507038 0.86583984011581 0.763981110267421 -0.602949869581166 -0.866853815071495 -0.970424688828993 -0.989450597238126 -0.983274378158901 -0.983504680989321 -0.924706931818776 -0.964899888062473 -0.899422964343153 0.986585946152814 0.994111039399495 0.995721596074955 0.99166455840302 0.995143258367317 0.996385088649269 0.995865833739438 0.99276716798591 0.996413693842015 0.995782020248816 0.989440681443591 0.993972752009776 0.993133279257529 0.986637495359559 0.98587475830167 0.984445713827452 0.992788534099269 0.990610944656975 0.988233052087575 0.990107158357786 0.991259795699217 0.990273595629926 0.991187052126793 0.990610993795845 0.988488810124591 0.973211390753408 0.983080921438416 0.930616927750264 0.709727743254217 0.914674175732375 -0.82891825870765 -0.951703896570438 -0.807366531006396 -0.972252730666467 -0.973475391120028 -0.97506543564654 -0.962942329432746 -0.981605918700104 -0.98223367120011 -0.970770447283851 -0.96053357948662 -0.982791623656806 -0.980029538213071 -0.955339729957395 -0.952524298880131 -0.863244605646751 -0.89045534963585 -0.984514458511805 0.273100093795297 -0.912592292085041 -0.92211721789986 -0.922171690258109 0.988766048136052 0.986856667679482 -0.982803904264356 -0.775441403362823 -0.858152011331018 -0.759714494328541 -0.825077645885244 -0.880293036978232 -0.877228534475681 -0.735475127547088 0.319673790094705 0.291117092032594 -0.493774051361574 -0.622239692365485 0.531851069154258 0.472572980252436 0.540596787130476 0.576306836119075 -0.0946150382895457 0.902971101485124 0.937946175213939 0.91855332362978 0.910952856562974 0.91145981097143 0.905754069051368 0.93071676319675 0.941267116091315 0.919251298142672 0.896776369829908 0.956056413800616 0.960432146927714 0.98373183264449 0.979896722493504 0.993818412691916 0.993946121410025 0.989394952083903 0.928970578022521 0.921404476911623 -0.888227913063116 0.845353010076108 0.994246687953742 0.771980957304114 0.994028154495234 0.993200509240888 0.9349044516754 0.515612382037367 0.953728225374232 0.948071657357636 0.905363898659885 0.766108093142765 0.36267979371101 0.567559094440792 0.569918315432261 -0.903608354308706 -0.959704412461082 -0.947320456383986 -0.951740363211788 -0.915439203296065 -0.917223184709544 -0.971579658807806 -0.960494140095592 -0.904197771636519 -0.96968545893331 -0.972885843032132 -0.955130772873536 -0.925320272934711 -0.953988505441249 -0.953867892242128 -0.835006654126128 -0.941857607928887 -0.955753710799192 -0.942139719473342 -0.880975094086619 -0.8909344706364 -0.924144418031273 -0.271042871383696 -0.496095502992247 0.878885625906434 0.979010294427886 0.990155044590645 0.99418265631763 0.997632250825265 0.997724144714028 0.997219905966904 0.998125257791745 0.997733737952268 0.997554980211773 0.998268705830104 0.997851582401272 0.995966275567087 0.997401827332716 0.997638797568799 0.988572303730581 0.983090963950368 0.994143549714723 0.954635110532009 -0.988587921199707 -0.992304661804517 -0.935327331877748 -0.912565375644513 -0.99116043760535 0.915130203897289 0.993780437061562 0.99091688130093 0.927614347896786 0.956376050077079 0.982946955154363 0.978809341473235 0.113568944931315 0.00020531323588813 -0.985463820106401 -0.976812988683885 0.788989320794222 -0.972085772263041 0.937888496063017 0.936977919653876 -0.966452016839309 -0.955191022855591 -0.893338723215999 -0.870098479317802 -0.946059528931885 -0.972399306385196 -0.923726612407889 -0.646395933249819 -0.961809800763513 -0.965182523707532 -0.817957366178207 -0.75296369258328 -0.860878889640573 -0.905818527152096 -0.700724874341962 -0.216844072388911 0.616114124658328 0.651530244668761 0.390895133639294 0.826416135858454 0.905711876762801 0.487829259759016 0.395405309969578 -0.453856870947768 0.253134178054304 0.185801813188336 0.9048493548401 0.844997366416839 0.331596950999626 -0.0261414171217328 -0.679045221068171 -0.739973416113915 -0.458399794796775 -0.533048120316322 -0.801210339297561 -0.441671045860601 -0.565603203796619 -0.288594335991507 -0.0781890172515931 0.341621906485166 0.265280061453075 -0.832420976799349 -0.908987655033308
-0.9739191984839 -0.962280013563124 -0.978254736261342 -0.958345440949642 -0.952488252809601 -0.97533833817537 -0.969871151613193 -0.917224368578336 -0.969048473118077 -0.97740014465803 -0.964086265233987 -0.796075483527428 -0.913522907103266 -0.942929702558095 -0.941613501703098 -0.803590782170127 -0.947897142228387 -0.929422094383786 -0.886321453650338 -0.940473347177202 -0.895390523061476 -0.450820760767344 0.282921858469052 -0.44468008981495 0.785999247278284 0.65455340802618 0.553871277293519 -0.326606720861549 0.659613005113792 0.63084402846026 0.21479253302554 -0.470691829134645 0.849396481442372 0.843471726354977 0.851059160472056 0.866302708726143 0.931391209506878 -0.918667588325527 -0.928103117082087 0.644490789720841 -0.769441146008731 0.60034118135861 0.965270156390339 0.752156395114262 -0.923604103030247 0.672018665037102 0.976921951419552 0.949859700415647 -0.97296737880638 0.251471811411509 0.970180583583221 -0.949862840697831 -0.863120224971131 0 -0.739090861924875 -0.985994806972659 0.826439577343871 -0.877659907544802 -0.983841060967849 -0.944004976348477 0.275347624951795 -0.8645399556117 -0.777288469888891 -0.888644794210464 0.238022681071676 0.089525147972792 -0.402159622077247 -0.855839829752321 -0.936762690525804 -0.981281801505753 -0.989673183717079 -0.988976721954101 -0.988804773994659 -0.976372476373438 -0.983674277116199 -0.977707431171305 0.94104726356726 0.991770815963839 0.994755634851215 0.98400435773639 0.993868639160022 0.995987916220234 0.994885642063117 0.988213298846014 0.996113257420377 0.995446025164262 0.988458090952354 0.993203712310311 0.991298967514871 0.977423462420591 0.979480493877688 0.978630467398383 0.990821349525879 0.986299515781282 0.982621634774957 0.985804419269393 0.98711428704091 0.984352731927178 0.984733803011635 0.984158550661339 0.973588413764992 0.881854656795284 0.801962558674988 -0.433713976140961 -0.666174978167971 -0.522719728481204 -0.957493119669892 -0.970945504502185 -0.812076070841167 -0.941343367308674 -0.961029933114908 -0.963381140903837 -0.903880700921205 -0.967747699916198 -0.974210642974635 -0.935832126689769 -0.880279222727051 -0.971677989756817 -0.966247397989349 -0.843564925828321 -0.825336328786326 -0.338515358918255 -0.536133122538266 -0.974851565784076 0.76798316193992 -0.833072881454588 -0.868007498759784 -0.767214821993036 0.989733782035381 0.988645006415228 -0.969614278283646 -0.600977488907135 -0.710358379365125 -0.542328859969088 -0.652785224478131 -0.770315453202741 -0.820009526432013 -0.653982126980524 0.506553688339533 0.630151631087688 -0.309148341191645 -0.657795280691728 0.198904725710132 -0.257869188472351 0.0541065327530662 -0.0207780594308364 -0.560591845471863 0.816630644195484 0.917273432498926 0.897387434635398 0.85508645974192 0.874211396292693 0.864227823818628 0.884693971337916 0.87985938661241 0.858270395398899 0.82213965369499 0.926919785950645 0.931252518363482 0.975662593781524 0.975779397462835 0.992870842563736 0.992233370678219 0.978902604983586 -0.200880211490733 -0.152379616842666 -0.96623971985048 -0.375555146646697 0.990808344937844 -0.255629567292383 0.99269611521644 0.99106591595025 0.382967006443258 -0.355430577062276 0.932583914667177 0.880133351009266 0.680745884807306 0.460547237118322 0.0489242145013173 -0.0316817541806488 0.0011562153823813 -0.91854136563979 -0.960803842511755 -0.95355622846858 -0.953774926927074 -0.899645345946655 -0.904254662570832 -0.970833555736593 -0.954948137549218 -0.857006871486895 -0.96542222281049 -0.969818957341945 -0.937108309911385 -0.885572250407252 -0.942352635423245 -0.937778029567938 -0.64317847308417 -0.915008727733474 -0.94319940650528 -0.912785912346144 -0.784908737729106 -0.829604986126463 -0.880696226876076 0.244515923635286 -0.0220613734897392 0.918035473463958 0.981683140258804 0.990224884183637 0.993801400555142 0.997558392088711 0.997640919259328 0.997353061864732 0.998169995714156 0.997890920350225 0.99757226375706 0.998315482165519 0.997925699408309 0.995948083525893 0.997260017206478 0.997582878678431 0.987409070129358 0.977063960711955 0.992420923155894 0.89899953793411 -0.989154539381774 -0.992189941012794 -0.927989209479342 -0.919408483425563 -0.991332615799597 0.883604004498512 0.993672860669654 0.98920598865365 0.836921696578051 0.960035322047418 0.986685775202574 0.978851912874111 -0.17946317181695 0.110767874865047 -0.98743235146422 -0.982015409960947 0.84038351823618 -0.96308917938071 0.961354289606556 0.951915391716555 -0.958103477687051 -0.944647765999889 -0.881413231547824 -0.816998869946319 -0.922351415801972 -0.971436924378611 -0.933290833060047 -0.464642835650443 -0.956163481131193 -0.968970839556004 -0.874516893345134 -0.694798596208906 -0.856973695004759 -0.918220184155719 -0.73000071287113 -0.255627230953998 0.602356636740067 0.848435300062447 0.170450814960541 0.76516768358057 0.887914720437505 0.71112571152024 0.468634363571993 -0.196699279794563 0.592752801734926 0.647225373102242 0.942813742520688 0.928245909443237 0.88112070707796 0.791794758124189 0.566691060410425 0.390318423107269 0.460722236135326 0.480100748913262 -0.138582137573375 0.230368874635094 0.143218635322667 0.451198624331363 0.458712812373804 0.628623086044442 0.611008657466074 -0.633219227429964 -0.858895970579183
-0.954726872318142 -0.934095168146105 -0.965312852676508 -0.889963635490972 -0.877773993856329 -0.959963480383423 -0.941664560999565 -0.624380856863796 -0.934595421421287 -0.967150779124956 -0.916565323903958 0.123621783190844 -0.72684982719677 -0.826208506614517 -0.685257828404646 0.372820952098048 -0.771439303200524 -0.604879607700669 0.0572337036384073 -0.590245069231757 -0.558190680918282 0.612623108118318 0.694545155958432 -0.130622775417136 0.620238743386903 0.503337517755475 0.299515318460549 -0.773415232803245 -0.146370709835337 0.0989036148845899 -0.477369475573592 -0.827800316790368 0.542767797409111 0.664149152224199 0.452767963481949 0.273516572915824 0.717047701746076 -0.942919460694879 -0.952178033194916 -0.859026641051461 -0.981323910100421 -0.96879719131494 -0.836022519297261 -0.927913017163036 -0.982469742485127 -0.976850818580104 -0.432163251395746 -0.949341415209777 -0.990661065044757 -0.974658193419396 -0.964630944773299 -0.987649737318824 -0.17803163842808 -0.739090861924875 0 -0.959439853701657 0.988451486577847 0.990229629233617 0.839338208427869 -0.440934102827257 0.972439017038457 0.943036765290215 0.794132013137144 0.225204321477038 0.946346904987355 0.91797903889505 0.912119787307693 0.317317017575948 -0.68335801799605 -0.977704717792557 -0.989086608635925 -0.988315005230971 -0.990135284169716 -0.981655385632071 -0.985749298552532 -0.983903911849411 0.502633584727007 0.987764773554441 0.994115791805144 0.981725989818728 0.994125078300409 0.996192910494687 0.995202265493913 0.991425077760224 0.996469176783219 0.995941968690268 0.990221519284585 0.994378847755255 0.993511723376261 0.986124775087671 0.98535807993735 0.985751815633339 0.993239020882108 0.989106095327422 0.986925147297395 0.989909826274293 0.988766683399567 0.98515136499421 0.986796348391855 0.983615000579248 0.958910549124623 0.49223851811438 -0.693239433452079 -0.819300992795465 -0.924170667836295 -0.96428629006325 -0.981194564006912 -0.981709132627135 -0.958956762785935 -0.977539711472587 -0.978057813990781 -0.979293529152856 -0.971460574336333 -0.983358817609751 -0.983075698795525 -0.973300114200511 -0.969306687056772 -0.983578719711491 -0.980002438876701 -0.958068991776173 -0.95627832167237 -0.910831425923214 -0.924598584778021 -0.98699602899654 0.13575696459106 -0.912848672746921 -0.90140301818586 -0.906369104685941 0.98509150094151 0.979984583032993 -0.976077099084608 -0.924644251997802 -0.945061081763631 -0.914325756348393 -0.921360618984219 -0.945634042684852 -0.94854940755982 -0.908565267426249 -0.764455425498248 -0.750972245011421 -0.890284295494789 -0.927491206206067 -0.833551313766302 -0.832405963292789 -0.697716559086262 -0.739912180410816 -0.778286415363954 0.696961417387616 0.898508675353844 0.881332108780084 0.859969698204964 0.887064513090248 0.871760660339707 0.897428035881131 0.909055366616784 0.891181563825279 0.862288979395186 0.937586865859136 0.946156243626302 0.979225862039101 0.980603481333916 0.993257699114863 0.992445582762852 0.978201116395009 0.313972978807862 0.525459003993687 -0.957970117155878 0.15431395889971 0.987563389911414 0.394376959497252 0.992011202242389 0.989019162220147 -0.261050886177612 -0.216632027115715 0.925223082056698 0.82742860948877 0.493007188022287 0.188863729230471 -0.338869811757718 -0.455618540106354 -0.37410276214261 -0.931111562378014 -0.966024497889517 -0.956881016337913 -0.951405430493149 -0.929666984838414 -0.932820825264006 -0.973026500489157 -0.958763709874615 -0.903498043813926 -0.970042669705605 -0.972284782296752 -0.95063343263394 -0.918890930359645 -0.952307909374689 -0.950826730340876 -0.76355284074511 -0.931112841979578 -0.950728991070389 -0.927830820662113 -0.833901787198532 -0.861911856477464 -0.905435993533579 0.0364275303158238 -0.123435823229976 0.925541534586255 0.981896639424913 0.990776974791469 0.994439195825673 0.997570437800156 0.997737384009192 0.997427785374849 0.998151795415121 0.997693824025916 0.99755705328205 0.998315488479956 0.997788226666358 0.995517671469737 0.997199874612669 0.99753303693565 0.98726407857102 0.979358636360608 0.993532036179592 0.970517957615119 -0.985518159244771 -0.991037215151177 -0.902440714992206 -0.828985411482163 -0.98975288227054 0.914716170995526 0.994004618238286 0.992190887654293 0.920739631683706 0.964063401143026 0.989537050220776 0.979885531691891 0.299706420817458 0.20424317749566 -0.984373811176 -0.982032539053438 0.773276725332777 -0.919776931429275 0.972635045451655 0.970906951908539 -0.897572978802001 -0.894593055071471 -0.672071295199 -0.223493723779295 -0.827065171660809 -0.962647735086605 -0.851120615944959 0.647826425966143 -0.942376489227834 -0.965005619926274 -0.580486011179514 -0.0506456831249854 -0.693702766489919 -0.805519854788913 0.157724410324825 0.71335713252036 0.91828951247024 0.92233698139836 0.642797924735209 0.864467825982444 0.890176382893594 0.522888869314123 0.38862627991165 -0.443016653211849 0.0449907635756831 -0.0024010229759405 0.914647886007089 0.872182058324439 0.593325372060472 0.230394102136738 -0.470673192916991 -0.503324066127308 -0.124011088319336 -0.27328184200821 -0.661629207492368 -0.248705422668297 -0.320241312601245 -0.0657450330388908 0.107646096571307 0.491719573472589 0.335597784925826 -0.773561362147756 -0.880591208878717
-0.967898700991094 -0.95491572077064 -0.970894047378746 -0.929113223270905 -0.93280223478823 -0.969474507772766 -0.952682568619561 -0.809926018849578 -0.957101354859152 -0.972640395235712 -0.934785737349923 -0.430891700855712 -0.82847872082636 -0.869842128753268 -0.814202836132611 -0.149519027833956 -0.736594212292588 -0.430956444365471 0.0359630854394693 0.314064489441652 0.0270551783302649 0.805446979268803 0.787044187528449 0.38962418287221 0.755581826176577 0.608074367427586 0.571306806453406 -0.655886963820001 0.134798417261583 0.283822905933445 -0.416685115661701 -0.835210996752798 0.57101297667576 0.665586328119583 0.438752086984626 0.415656821077049 0.695877374618079 -0.95683201580649 -0.963432203459179 -0.959859984900074 -0.988719413182168 -0.968838528116506 -0.911635182949917 -0.958296994778251 -0.98005338233606 -0.969794776074748 0.391105453418536 -0.881627878952856 -0.985571200163736 -0.884631552333772 -0.714475517197639 -0.892793034147696 0.951533439656754 -0.985994806972659 -0.959439853701657 0 -0.824525711755916 0.981675425857782 0.836508580059667 -0.91350740142484 -0.527691404584312 -0.421334230085052 0.446983532108225 -0.771145614586322 0.585786929885841 0.771673690508455 0.537340069498892 -0.787428811518846 -0.875573605375443 -0.977326164122328 -0.990471562398232 -0.985108450409272 -0.986884167335588 -0.9610132439192 -0.975282033528391 -0.95533366060339 0.973886378571116 0.992942050963223 0.995604844123028 0.991290336510321 0.995179346101915 0.996425768052635 0.995882718322986 0.992616917442054 0.996421841215247 0.995705769095564 0.987528251568863 0.993616003568226 0.99293506670409 0.983986567265982 0.982655517561859 0.980826509845389 0.991719070879025 0.988550268411247 0.983989549654664 0.987416931022869 0.989284256459939 0.985097757460711 0.985761810538426 0.98784518814605 0.972804090607632 -0.489412328508908 -0.933093405847148 -0.908234914003899 -0.942967732890752 -0.977057513354878 -0.986521805151468 -0.986902028001326 -0.980379965770633 -0.98719055147507 -0.984443267224011 -0.986543670916233 -0.98346180241997 -0.98739093116569 -0.986888936884225 -0.983327351900569 -0.97968959518082 -0.987484692687645 -0.986190265557777 -0.97709538544853 -0.974737153404063 -0.946358841388234 -0.956510508708141 -0.989718150330839 -0.247470007442346 -0.926951937981425 -0.910340444211206 -0.939228733739296 0.986698082391614 0.982122061910026 -0.981650847219594 -0.913265068429613 -0.944006721945472 -0.921949661220876 -0.932223654997659 -0.950216377260104 -0.948407957237937 -0.916130370937887 -0.804985274259011 -0.835188497253936 -0.915135280443213 -0.950075749235363 -0.910971640355847 -0.929673218637386 -0.849018832548862 -0.885114734218917 -0.914975520739421 0.246136168026049 0.820153433503696 0.701299812147649 0.645466601403229 0.798614564179309 0.778164421081335 0.829557275969769 0.87578041527185 0.85042237628406 0.802516538615585 0.936531934036732 0.946261123407152 0.981107767346359 0.97781099101577 0.993496501602726 0.993625543757205 0.987547798701741 0.767830048185891 0.70910267912506 -0.955306663397535 0.0822681054342479 0.991363898053703 -0.464085862284439 0.992415101673958 0.991234489341413 -0.110639039350534 -0.792207736261702 0.888861573898723 0.775703673860433 0.146670258314574 -0.390720139134943 -0.762137824545892 -0.827492896892321 -0.732118774896893 -0.957529768677762 -0.978121468184452 -0.971609665365152 -0.969320267152842 -0.960354513537652 -0.949312402481027 -0.977464656654408 -0.971792613274554 -0.94216076396229 -0.975229359755209 -0.977805753630305 -0.968761419834497 -0.945116516361984 -0.963010130345207 -0.966273251144227 -0.891278832973472 -0.953068024200433 -0.964674607642311 -0.955873670875338 -0.905232190213325 -0.913174362939097 -0.945198037273546 -0.490680249354817 -0.616452484273865 0.857415296288263 0.975995438611874 0.989565457617698 0.993256294021381 0.996746158819274 0.996265466435341 0.996113560160956 0.997255898173639 0.995161522033104 0.995505640229194 0.997259262483174 0.996176859413551 0.991382327001956 0.995776289313379 0.996039943167986 0.976658787712478 0.969640009975503 0.992427541281034 0.978248442463228 -0.97915861829641 -0.985646770911194 -0.0392300286976534 -0.605640786116473 -0.98758706472841 0.932766499667155 0.994289876303882 0.992152293862274 0.916432006226499 0.97346370543889 0.991432673279239 0.983433873487362 0.494154126235026 0.557394839874601 -0.985747539429064 -0.981640911081155 0.850686574754091 -0.938817985053752 0.970054744377235 0.968145745202287 -0.922473168717009 -0.905962289994029 -0.727468575914993 -0.483300850930535 -0.859265838706289 -0.962075888677558 -0.862570764673127 0.587885339844129 -0.939091928872593 -0.961349925272547 -0.536758580656532 0.0228339493519317 -0.398196593717115 -0.536568058250464 0.32862597705201 0.824155458213238 0.959930827025082 0.935141895235102 0.796364328769779 0.925163131425149 0.936113999750913 0.773600102004508 0.751633656076204 0.267232171612742 0.672271135363852 0.645957348980416 0.936940898046085 0.904136444426999 0.695035255362012 0.539867981555511 -0.198822872345601 -0.264683725761171 0.220419293304773 0.118625158520442 -0.573038554179694 0.0501044935611741 -0.0231271150631752 0.220509543925981 0.299314259674358 0.590141365689093 0.592995012309025 -0.697930625416609 -0.863585819150246
-0.976765278187546 -0.96717421764562 -0.980441733836972 -0.963250907571502 -0.957175626109242 -0.978331865333209 -0.973563718202592 -0.921984956005574 -0.970926416143278 -0.980421137697877 -0.967248995209274 -0.757007812125633 -0.906112073127562 -0.938677061887255 -0.920627713945795 -0.422236225469984 -0.844016905939591 -0.731458021828712 0.29655652599865 0.585038831662345 0.329894093956335 0.920101973845913 0.91862166936292 0.843574089070536 0.937784873706574 0.91895355861175 0.922674632537001 0.677950027998999 0.878024966832514 0.895717089228872 0.781329907272888 -0.0264411438673969 0.908797308133618 0.915852316780424 0.937042067081995 0.932917204860076 0.947321452944924 -0.918504833496268 -0.935760658217284 0.228391778431373 -0.955681293960065 -0.701336314952992 0.947931867443769 0.483252146361775 -0.956005687216525 0.00222988682473251 0.974698722359097 0.898792434482275 -0.950166246227832 0.886395221833799 0.95783909878001 -0.302258521202827 0.943101368306927 0.826439577343871 0.988451486577847 -0.824525711755916 0 -0.817120893036814 -0.981533347292241 -0.93101942416992 -0.857509608902501 -0.958133275496352 -0.486149697761543 -0.874358483148374 0.0776789374119625 0.241624191496085 -0.33648266600853 -0.864141814515692 -0.935463170326629 -0.976883365206132 -0.990315484598496 -0.986393733263564 -0.985248127484276 -0.954231114130867 -0.974995045603932 -0.94560980180456 0.983289242086677 0.99401214183012 0.99576517889821 0.991060763868017 0.994834217383678 0.996254922190024 0.995513683550777 0.990517016595867 0.996203415868337 0.995552596744575 0.988254547217341 0.992710328393911 0.991392099186616 0.97636947614514 0.978849234390569 0.977092522660438 0.98973870346122 0.985297748327468 0.980079761677957 0.983357433236897 0.98179925853408 0.966010276925953 0.968871936993088 0.951132121943819 0.388855459129346 -0.869787800115375 -0.941922431362213 -0.937388558635211 -0.946767330694589 -0.969442526624165 -0.984945936186579 -0.986697394212041 -0.978615372973383 -0.984143140067406 -0.982405714191881 -0.985379717331097 -0.977297311222016 -0.982448973664805 -0.9846309802519 -0.979317925247449 -0.962963214393399 -0.98277218492381 -0.983241522292054 -0.96483875628452 -0.950038819331436 -0.860542820676473 -0.916368207401767 -0.9841963527803 0.347948179309895 -0.899129947145049 -0.904966963545044 -0.898200796973669 0.989283111013148 0.987535596759009 -0.977822956046686 -0.803254015764339 -0.862142778292834 -0.824408655481522 -0.882964325241516 -0.912101946428308 -0.912095800228799 -0.868811216838216 -0.638718580785126 -0.638378668916209 -0.856558176286642 -0.930467824841465 -0.888810804286355 -0.929541422646334 -0.84919523971929 -0.898942664356995 -0.942371385229433 -0.433559378117435 0.719520967155378 0.329541654939471 -0.295311235938637 0.580168269325074 0.563009450536751 0.355378970313046 0.418735107074348 0.654602897790953 0.509509776041474 0.840582215067471 0.85716985670445 0.969175061933462 0.968996800275358 0.992975698888509 0.99290092037569 0.980821116057494 -0.764053571294115 -0.865807376693015 -0.977590320946459 -0.913540927157953 0.985344467529059 -0.946045638086071 0.989620151017716 0.990042470313766 -0.807281886055278 -0.943472946643932 0.670074696157242 0.162330677638065 -0.735686430688306 -0.813286125323106 -0.881159984374339 -0.925263558925209 -0.904299125803946 -0.97048170280304 -0.98219150129611 -0.979763976023152 -0.979275038585761 -0.970235274720693 -0.958129067430476 -0.980797684792271 -0.977787990521296 -0.952914181836638 -0.976928940903398 -0.980264795646681 -0.972341751250195 -0.950065291147726 -0.96621030189854 -0.969049109140816 -0.917638401049926 -0.958525695224144 -0.968914344643759 -0.962359799712595 -0.922602671055978 -0.929602803749835 -0.953496871318374 -0.63981652068986 -0.738706229532589 0.699334571846303 0.966757886521077 0.98640500541178 0.990367684957047 0.995822598907992 0.994156760819333 0.994599139587717 0.996293476177904 0.992199674428544 0.993000981174458 0.996167071031979 0.994396922029947 0.986503154395404 0.993949483923322 0.993618407798049 0.938482954405422 0.921818675104949 0.986987612461281 0.915554888390552 -0.984562189288592 -0.985181663114471 0.23598219491556 -0.865394272419358 -0.989633685597884 0.820555828812676 0.993021965008088 0.982853840765299 0.121984442612213 0.967885402197864 0.989994282855374 0.977637451888222 -0.282790958283356 0.640674554660617 -0.9889566031799 -0.983117901049343 0.918001150445376 -0.953088224772318 0.968595550466565 0.957044343504476 -0.945861745301258 -0.914282057839069 -0.841590112671512 -0.73015059306659 -0.855186107012275 -0.962876968791541 -0.926476137698846 0.0893165635402646 -0.930673054979518 -0.961895133442426 -0.858095657491412 -0.320832507323234 -0.576969202224542 -0.770413653923834 -0.124836094527102 0.765279769499042 0.928395502609001 0.946761180403522 0.802836660468974 0.877410410258581 0.916881468228937 0.853192276064633 0.798216407671543 0.351938891093283 0.754391743330712 0.834065397198239 0.950620473311886 0.928038629520349 0.875851627454197 0.836528053258653 0.74290417717434 0.730965139062518 0.749769913961612 0.762890180730128 0.416397024221266 0.669000043335223 0.640723920362328 0.748032223361214 0.717570016394343 0.780332279753358 0.82117799844807 -0.0994019379746142 -0.737654822065156
-0.966251767654708 -0.952234556669152 -0.97535614745284 -0.944228555677854 -0.930205621079598 -0.972044330754087 -0.969249443916613 -0.898882144464982 -0.963190260240634 -0.979108299506911 -0.96935927047017 -0.839701041882781 -0.927345447910312 -0.938269092303488 -0.938526454970385 -0.847683661222843 -0.929974964622253 -0.934562222670963 -0.913628799354229 -0.922358954844927 -0.91064665095443 -0.705525013008025 -0.48892813166991 -0.728302544612883 0.263739021100193 0.352116368102501 0.149361208168395 -0.61371281358515 0.425416382801681 0.432252934065672 -0.209389813853589 -0.644827446734714 0.852406708741585 0.847720135707206 0.859550576905197 0.850271328194158 0.92069218484461 -0.88457717712178 -0.902112088905988 0.620373266369224 -0.801380895028933 -0.237413091798888 0.928082658753348 0.590829255890641 -0.902695749973979 -0.351878944224266 0.943057160556745 0.851798491137938 -0.933414558509911 -0.657179907002598 0.762798924617594 0.923394779757457 0.947430440850943 -0.877659907544802 0.990229629233617 0.981675425857782 -0.817120893036814 0 -0.885700070150627 0.941818824486219 0.91829902234428 -0.0941518590250978 0.94337186764193 -0.844739483995605 0.575097777896779 0.874349209660476 0.877322997820683 -0.849861459915974 -0.928641805920577 -0.980375470320442 -0.989972776470863 -0.990898896151586 -0.990824690937884 -0.98484808126378 -0.987555052568633 -0.986144047831305 0.621657044940459 0.990011718401617 0.994545737527159 0.982387838018604 0.994007663144741 0.996182335875154 0.994897626075905 0.989712815287389 0.996335060807766 0.995752364739862 0.991057829565776 0.993398087920364 0.991994092261258 0.984073094891601 0.985320748778673 0.983824066998659 0.992422991055854 0.990899303073257 0.988227528439687 0.98973186025314 0.991637945616884 0.988745299541057 0.98439721777987 0.980888225402202 0.936550774285395 -0.0292379260394468 -0.877650241403538 -0.890512443796677 -0.903872951917824 -0.927301154662613 -0.974865982665661 -0.980585903575688 -0.937312992901157 -0.966485083030057 -0.973186052421641 -0.975000118373678 -0.949023716341811 -0.976415714416339 -0.979970708036077 -0.959755474705362 -0.933041521005556 -0.978656733834798 -0.975832081176512 -0.916947576840304 -0.903419758167054 -0.728297173440692 -0.817644729704026 -0.981549445245443 0.697735004448496 -0.841846403702053 -0.840215863933333 -0.771666278003602 0.989315316170117 0.987342591774199 -0.958824806659288 -0.631999649605658 -0.757230961171215 -0.617148336188975 -0.622985224757188 -0.762689383629149 -0.798701059170468 -0.594181983822867 0.373977087382835 0.416375777026483 -0.23962861251496 -0.686313237001494 -0.22936558733264 -0.461931422443581 -0.0832280885218854 -0.199511634498183 -0.250752144432914 0.841156883804519 0.922487305651189 0.928121519921795 0.906311704419812 0.923029808248457 0.90850364308392 0.929515756730644 0.928116633452636 0.927196327551245 0.927678665067713 0.968028680993962 0.969182312299955 0.986381437479286 0.984889019246591 0.994706486669641 0.994209583575695 0.986636501474488 -0.742926168030666 -0.804838675408073 -0.974757640097087 -0.84929881728801 0.985331279710364 -0.785449400250173 0.992178045520101 0.990674887056074 -0.740805407535055 -0.754002899573789 0.944843930934691 0.868686397549664 0.369466706975364 0.25841855152175 -0.124390321845233 -0.663397597713078 -0.532934697252368 -0.927603860521344 -0.968185508763012 -0.967821994511671 -0.963530388213376 -0.931755689555664 -0.92286583037754 -0.975166548487887 -0.96540792954582 -0.908406802943456 -0.972084871514266 -0.976215354800844 -0.959490014132322 -0.928405659362244 -0.959923127188295 -0.960474621535722 -0.847857642432318 -0.94782720849084 -0.963566933791646 -0.949588907921471 -0.888564169331251 -0.913548402289353 -0.939938238185974 -0.382350018155991 -0.564915476323062 0.806297261188192 0.97071302364289 0.986362420988524 0.990278723049822 0.996055550436117 0.995029259780431 0.99536246671566 0.996843322262979 0.993992082994074 0.994033954562362 0.99672982092363 0.995458625331026 0.988566633097057 0.994383747941248 0.99464457152718 0.954712505406394 0.92159718513606 0.986756984766102 0.930128154101484 -0.984777113230167 -0.987317667955964 0.0673518163980176 -0.744611732727071 -0.988570769340292 0.905328162181447 0.994239922360802 0.989369749856575 0.725076862479265 0.980874229279469 0.993418821729322 0.98701571402517 0.741869857163713 0.928755399291728 -0.985863300444126 -0.979493099069314 0.960440919386609 -0.727776895892373 0.983451901846924 0.976158341256379 -0.811616161159215 -0.607203917388904 -0.0397010018776245 0.310690237252218 -0.31793355352769 -0.923326415995632 -0.789815528105602 0.716954144421596 -0.868978961118991 -0.93877503062539 -0.678802596709285 -0.171138996265456 -0.583115284186974 -0.555570912292949 -0.385497575257613 -0.377003022934866 0.831352936102729 0.798101431915473 -0.651123814688906 -0.328955024531596 0.715720140384139 -0.136369200495642 -0.543794720495783 -0.738904865078263 -0.367808738188935 -0.476953975974295 0.663607162809941 0.52440432285794 0.441287211459083 0.00815747059957378 -0.188872724584191 -0.249427259138053 -0.13148806377103 -0.163771029935529 -0.38409827168107 -0.0948288694081367 -0.194843775282363 0.112849572845964 0.195039376580808 0.452766855243695 0.435667174652894 -0.635212392977735 -0.835133654981901
-0.945941494168674 -0.913000147464784 -0.956536478365214 -0.853782938897084 -0.824252686647658 -0.948067007609502 -0.933792393157104 -0.588340489525095 -0.919924557374534 -0.967676632160716 -0.929747382581081 -0.33021464785918 -0.779746236841993 -0.779120266015655 -0.756851902650672 -0.352253001867147 -0.725475201223179 -0.754869249938434 -0.790249464253092 -0.800734901412137 -0.826695418781207 -0.489864744684046 -0.305741639553845 -0.673729999004118 0.0228947107543864 -0.165252522975798 -0.215314961947988 -0.820911866773803 -0.435533147217272 -0.314330528795236 -0.688766823686698 -0.871367839963007 0.469219402770049 0.611515366247356 0.504692486340478 0.40517121005334 0.749101306760891 -0.941876648243856 -0.946094013351843 -0.79935463147537 -0.975243794347904 -0.952466907040044 -0.615926301707745 -0.880176608548941 -0.969533078379543 -0.952193781585887 -0.106105793918151 -0.823714827110661 -0.97535837334313 -0.947045174887797 -0.932451892804956 -0.541377995527373 0.71420994788467 -0.983841060967849 0.839338208427869 0.836508580059667 -0.981533347292241 -0.885700070150627 0 -0.714880973736855 -0.898731478500927 -0.963088009894642 0.835515495198798 -0.915672825594263 -0.48869383926261 0.753255417186418 0.883255303933498 -0.91197801613466 -0.929644313459187 -0.985242454384227 -0.991389977995303 -0.990604448902088 -0.991783327592161 -0.986628590925472 -0.987404833607088 -0.986463229654196 -0.438849831734859 0.985975212245948 0.994385201004115 0.984516786937462 0.994456932800176 0.996500271048177 0.995635089130491 0.992577330186811 0.996630893484155 0.996146922454729 0.991121240786046 0.994076352455056 0.993433547489048 0.987115708082856 0.986117198066376 0.983762974413398 0.993226504490706 0.991514690908769 0.986960735591362 0.989651875063266 0.992510404569826 0.981263747106943 0.812797828403256 0.670721812347675 0.0259566548019573 -0.944400370393322 -0.972306077117752 -0.953331638357709 -0.96197863241749 -0.977001470547073 -0.984276599412785 -0.985768850733487 -0.973021767639546 -0.982228976998608 -0.981337685533599 -0.98299449573987 -0.976375720893239 -0.984583772397935 -0.984520462578373 -0.976840088769793 -0.971671230122239 -0.984898064706158 -0.982545272178946 -0.964566993309958 -0.962252638206379 -0.923099328999724 -0.936876350968981 -0.987984748074406 0.235228548795124 -0.895924406668689 -0.856763213498911 -0.898782506566982 0.986445709496635 0.981168660123915 -0.970966043702841 -0.894660418025366 -0.934318248863432 -0.909305344411487 -0.897839344321206 -0.928258891343157 -0.936757495094477 -0.887504082220112 -0.661944017222748 -0.705725900002576 -0.87546260334503 -0.930502325753892 -0.865539064051852 -0.873163381417495 -0.820405549353142 -0.839368605378449 -0.76583648976633 0.349602795380185 0.824017454089851 0.857129010115984 0.838053467495861 0.886564931767781 0.859867565075119 0.906540158253437 0.920497592805548 0.914107915318811 0.916826717629944 0.968471483375474 0.972440073537124 0.987390030873773 0.985838499684866 0.99485810058729 0.994619721514562 0.988429436530943 -0.499875527928651 -0.493260187009029 -0.97282276344378 -0.737250012291398 0.984835548779106 -0.650960401963023 0.992202584626395 0.990204314481028 -0.856195574415309 -0.785037245964705 0.939665880744251 0.824638868899823 0.240109252915209 0.0758372795409389 -0.470782715396201 -0.797629949996609 -0.591763611589827 -0.936363220561278 -0.972305426897223 -0.969255877494178 -0.961989273576721 -0.942394790753702 -0.926633632164045 -0.973854879369998 -0.963990290891828 -0.914609067650099 -0.972825712665996 -0.976092207582428 -0.963223023513665 -0.936087560440549 -0.962146754356794 -0.964544807624335 -0.860066844513428 -0.95186569032181 -0.966085032159986 -0.954260662936311 -0.895682184267731 -0.916078998563015 -0.947131211453748 -0.421777098569673 -0.579858144775848 0.848713100530029 0.974568667676087 0.988439787897863 0.992170742767182 0.996355646339814 0.995339780848858 0.995587246078531 0.997015069712878 0.994062397205441 0.994352970054129 0.996944825096622 0.995752266392036 0.989171435121235 0.995024287219433 0.995658789677726 0.971310269810216 0.956972020413278 0.991697294490929 0.981135149962153 -0.976253224204237 -0.981343698416609 0.823264397982278 0.292276683206325 -0.979962536000519 0.953434127471736 0.995058885272098 0.993159026575301 0.930481070484827 0.986661059754849 0.995013563853192 0.990726152419773 0.932275354572099 0.965656817411478 -0.981810079858435 -0.977049660719296 0.967215185699165 0.396553272397222 0.987755707813039 0.984786715737062 0.255472662461811 0.66669289694448 0.830609129052306 0.884870235416529 0.811724276373847 -0.696778808130563 0.354503810095416 0.949925006432248 -0.126288873624757 -0.794285509839019 0.671906441534182 0.838584991717894 0.819843063690656 0.867669212607618 0.883032531997102 0.826575624911014 0.951547822954524 0.930112799704699 0.261774152161558 0.817187007832121 0.892392544974187 0.244973265970836 -0.000208603630787661 -0.45437376537268 -0.0417935540503705 -0.448697191450907 0.794308884819812 0.76456458793582 0.416850511419444 -0.0458470963567182 -0.565433063742636 -0.596182042582323 -0.299415602785883 -0.430163827589117 -0.667767251049104 -0.332859629829368 -0.383585391688054 -0.205306129525437 -0.0878899966493375 0.336901572222391 0.277037407657548 -0.750488610261456 -0.86280790770286
-0.947024825507232 -0.908848710840744 -0.95951608230626 -0.850184702921148 -0.770100995762902 -0.939956928115586 -0.924221204026209 -0.107366190483024 -0.84300312463628 -0.954872206115538 -0.827684525915972 0.728703166065841 0.208238079213241 0.321483994767204 0.742143583614974 0.897653911866022 0.870116344099414 0.883677564781723 0.859741326593776 0.902023987258418 0.697403371345423 0.886113015590848 0.908435334313104 0.83134586789025 0.894675412617412 0.851047773151309 0.887027843737739 0.221809649240779 0.627023017182385 0.758613984569334 0.459721735805076 -0.699609789910429 0.789749001496468 0.851830453574519 0.868087729628453 0.831824539563303 0.864477747790394 -0.942161772347642 -0.953226137247781 -0.895107177932132 -0.983168236439139 -0.964291617274325 -0.653484880369444 -0.922525870767463 -0.978398346315316 -0.949302654455448 0.274709559474424 -0.908057587886235 -0.977054399498894 -0.861122108736652 -0.898689869657805 -0.944766737487342 -0.468074648153014 -0.944004976348477 -0.440934102827257 -0.91350740142484 -0.93101942416992 0.941818824486219 -0.714880973736855 0 -0.912423983330858 -0.93205505762288 0.94343936831495 0.290260094793858 0.909466253776026 0.966897017781697 0.919272843668317 -0.120489182189969 -0.77156807394922 -0.971254068986104 -0.990413822919929 -0.981712637437175 -0.983214032889059 -0.93844007653039 -0.971309152305152 -0.939474662606047 0.979795041575088 0.993615771296245 0.996042394581787 0.993122441237515 0.995437351696574 0.996578416775189 0.99608073355062 0.993178337910092 0.996486497785024 0.996000807049006 0.988591921155445 0.992906396388666 0.992463903071943 0.97866101903006 0.976012963556993 0.975162179196804 0.988983533671962 0.975273251324147 0.935593011735839 0.95745819068266 0.652928137415713 -0.946084719932119 -0.976183857653455 -0.985334747059023 -0.981949267968404 -0.985533829412698 -0.986908252685712 -0.980684854394477 -0.981825920253995 -0.988514340939073 -0.990280764803914 -0.991176403418416 -0.988969289041032 -0.990223639945708 -0.988617620108779 -0.990370427119035 -0.988268118930687 -0.989211747201619 -0.989620489614478 -0.988290548076423 -0.984538444538897 -0.98907805803911 -0.989151912035177 -0.984295257709858 -0.980883576597605 -0.965608007481799 -0.974093420395765 -0.990654143658423 -0.696320133038625 -0.944785519133121 -0.933419382711405 -0.953626478397981 0.984874382567292 0.977834903952802 -0.983132365594405 -0.948333444868922 -0.962026327345502 -0.954044623192095 -0.960896678972233 -0.968323473761476 -0.967245861009767 -0.957527264234251 -0.934270561629701 -0.937582400461812 -0.9620338654365 -0.977754898273908 -0.972697027237674 -0.976134624646186 -0.96634545589605 -0.975222674344011 -0.976787241298435 -0.953006035711929 -0.746174003012007 -0.900494365831975 -0.940933101039789 -0.631988030573256 -0.615602986540312 -0.848622443757856 -0.796588429596507 -0.251215353093884 -0.495853477851093 0.119829582375754 0.473183344985785 0.940233310822445 0.96523932165823 0.992902584712491 0.992955699468691 0.960958830139841 -0.930611863912732 -0.950983289981996 -0.982579977388261 -0.964463907357934 0.908580797507121 -0.974180177831173 0.980565904522849 0.984547103999374 -0.961613313361058 -0.975159857807073 -0.582945879773136 -0.849445362090156 -0.944930044997969 -0.947031835276364 -0.958888868387937 -0.973323729309246 -0.963981767239321 -0.981165304653788 -0.987494599556541 -0.98599362030897 -0.984720918298461 -0.982059750553926 -0.973494701952229 -0.984515037206376 -0.983638023915848 -0.97143574789911 -0.982504810388301 -0.984648155102527 -0.981615877376028 -0.970177873087908 -0.976868236821329 -0.979552776621216 -0.957751494832625 -0.973743559684994 -0.978765116265908 -0.976287818519658 -0.955317798493029 -0.956845119093592 -0.972533886847404 -0.844383116557699 -0.865310552489754 0.397338769588745 0.955492896802088 0.984527996678024 0.9888082354954 0.994488658518583 0.990117837768043 0.992194574163055 0.994910867571681 0.984273109134899 0.988127231588335 0.994788320795126 0.991789214529171 0.975354768452308 0.992027011346121 0.992095750216993 0.891314759731809 0.893622337848103 0.988035213972729 0.963061750061312 -0.977914403170414 -0.968396553000233 0.884465409169711 -0.588822816972527 -0.982780784047317 0.832133392685675 0.993381171709784 0.985598956664589 0.0311436423382631 0.97700991715841 0.993199254910537 0.982613969999229 0.552993966010307 0.916364257333629 -0.987555510257343 -0.982457919141923 0.954039861852447 -0.541855201314333 0.98452480973463 0.980570393220989 -0.295132960816841 0.293881393990822 0.507971553232938 0.807953517323463 0.774580945984731 -0.790052017203861 -0.311655301221296 0.948770121415591 0.169154823817371 -0.817114734979696 0.548946256882682 0.922266017668791 0.907093387268773 0.901304793373361 0.958537687688665 0.937049110114996 0.949346066352094 0.945173318585333 0.874144066794184 0.907092278031111 0.904519781000433 0.813679752430315 0.814428624309983 0.250774327009876 0.526762225889901 0.658170068375627 0.943532360123846 0.919300034708084 0.778517375824015 0.70538668141938 0.28439656887308 0.395429566836356 0.646667391580726 0.608916238772265 0.0741255616110265 0.567676317872345 0.566548304426285 0.647683139947467 0.627356082413486 0.754842643432983 0.796355145966143 -0.182552684328179 -0.713740973811807
-0.971942436556372 -0.961539149903519 -0.981399924130638 -0.962883852059755 -0.936314124430983 -0.975137915466824 -0.979197386317761 -0.919278003723323 -0.95541142477517 -0.980253292159409 -0.974657306929851 -0.720513058150232 -0.893825613990648 -0.918495613903226 -0.770580023270102 0.206079877822773 -0.582008527993171 -0.477200677594698 0.581098212768934 0.547363014019764 -0.254415634996772 0.893267749229267 0.923226967262203 0.83472211533225 0.94436584792105 0.946135206771659 0.947550862822532 0.835460011620272 0.92391778568226 0.937455045562264 0.893216635087228 0.61427820527106 0.947218771744962 0.948910558274227 0.963501949064649 0.955712610473742 0.961962906808659 -0.757652028431821 -0.878438928778574 0.731072543546124 -0.866273168699627 -0.633057220969201 0.938949941497857 0.572481816923288 -0.929809451404287 -0.393628501415698 0.951374773737272 0.624399435011526 -0.931973180007532 0.171618458823286 0.74854906867119 -0.385800541438571 0.103195468020964 0.275347624951795 0.972439017038457 -0.527691404584312 -0.857509608902501 0.91829902234428 -0.898731478500927 -0.912423983330858 0 -0.324857155244841 0.77042751489635 -0.976799089431625 0.892882593429215 0.932173566856657 -0.0990858851081409 -0.904798773618123 -0.921412669971645 -0.976420481314149 -0.990962746819626 -0.989571169893639 -0.987870526567275 -0.976133025117443 -0.984605952559382 -0.977387427301556 0.958508825386827 0.993132615128242 0.995720524489578 0.990602644550919 0.994820628783554 0.996330474301615 0.995329230361563 0.989960250337009 0.996258088069381 0.995557569571572 0.989041721517796 0.991586775243284 0.990469814187512 0.966317125056721 0.972554567738484 0.974658881212981 0.984495914925786 0.965663702986288 0.951941566380305 0.938743182484553 -0.666389067530755 -0.869942683579548 -0.918650526781521 -0.980075154333121 -0.979890819435576 -0.978340800645161 -0.980150768058224 -0.976561042801615 -0.977913441424911 -0.982688601193411 -0.987226105208762 -0.989831947890811 -0.984845177923332 -0.985320276960395 -0.985615631678436 -0.988028266687239 -0.981556908456742 -0.984769952740181 -0.987294755378377 -0.983663929778726 -0.972363244721379 -0.985410206228527 -0.986175618663898 -0.974274796025241 -0.963347804909719 -0.927218902303575 -0.955382682219625 -0.98687251718605 -0.101940691539868 -0.914901396580472 -0.909687989807319 -0.902294632151314 0.988252840089121 0.985550585366343 -0.972443318308378 -0.864778692794131 -0.890486459974935 -0.863497109369163 -0.907861983809249 -0.9305928254049 -0.92394164125481 -0.901858948042151 -0.835145570807738 -0.820696802453287 -0.896789126173358 -0.951200917088565 -0.948262923728943 -0.958416450916205 -0.927887564226362 -0.954902792767107 -0.967422592664788 -0.914992979898505 -0.155475307920906 -0.700570561640493 -0.909960074005354 -0.166417345381711 -0.11451467634741 -0.771382636239829 -0.796066275749267 0.137357756285016 -0.0737933559155236 0.0669243213069788 0.00169017850402992 0.915144071119793 0.957822111545933 0.992160339172172 0.989717628570429 0.77713375875619 -0.977158190896367 -0.982684272501101 -0.987742907959967 -0.98289957643162 -0.20368970208315 -0.983412960777187 0.97575553567934 0.982695518201969 -0.972405887344308 -0.979470397420511 -0.576739008929556 -0.865635238223653 -0.956036500817731 -0.952245189531271 -0.954731744790906 -0.973330068395867 -0.968433172939189 -0.981256852801475 -0.98685330218154 -0.986488690279676 -0.98563957094287 -0.981473125476421 -0.973633155218288 -0.985346579108197 -0.984176146592937 -0.970717040983659 -0.98247473457975 -0.984998009920887 -0.981014888985696 -0.969053380432062 -0.977176657800361 -0.979130489168623 -0.957272069088088 -0.973624731948286 -0.979475171953079 -0.976138649990477 -0.955176673974334 -0.960040974236173 -0.972633671049336 -0.854859329227663 -0.873826066314867 0.0444675650867279 0.937193143724778 0.97957039614537 0.984066972259573 0.993006073079707 0.985846140087981 0.989769514476788 0.993260020954083 0.976553028653245 0.982952505479696 0.99307380268674 0.988361256395845 0.961504564764207 0.988453454119796 0.986853044312651 0.552001755335534 0.518562983850425 0.975475401558099 0.800224466873052 -0.984474843275254 -0.978724247485333 0.652204677482798 -0.88451542201134 -0.987764740573651 -0.0564546284244523 0.990576713105799 0.949052652687421 -0.887028201292738 0.949204093771416 0.99000718849008 0.959392417911907 -0.702117005872547 0.735531258239791 -0.98932184064227 -0.984396853176263 0.921648171538295 -0.792220599881715 0.974760979506617 0.956310608473529 -0.834338449442852 -0.69158886457081 -0.675669179882605 -0.242906959614181 -0.290937272223971 -0.921157334152928 -0.899289314361446 0.450168408472118 -0.803088392438476 -0.935789493219515 -0.865191858495199 -0.110751461614974 -0.445624662658304 -0.436287388973484 -0.0792216059201614 0.0840528819964721 0.748412824264874 0.83689356777137 0.219915961571813 0.0737574055204606 0.692642929633018 0.656710766098035 0.426726534744458 -0.463118090170007 0.206321821306559 0.638095154966967 0.92212662186038 0.859631187932106 0.796081216189515 0.73555295691111 0.687335205504104 0.748051342723848 0.748394687455681 0.765242651763796 0.642950359440814 0.754352051908358 0.727829564306269 0.804601133650567 0.78875546235859 0.823036506885322 0.852969858156365 0.340248354594152 -0.503870854112754
-0.951907910467221 -0.928175499673063 -0.971398315281244 -0.919113844127308 -0.837266227646459 -0.958952297303544 -0.968936886921032 -0.792970843203187 -0.915701325189605 -0.976727177602417 -0.964348045115012 -0.588280855300451 -0.852410163063458 -0.871783614631936 -0.710379839294503 -0.254898711246666 -0.697894077679908 -0.771400009163723 -0.639108088500977 -0.701929075728919 -0.804470614900057 -0.0901453351457566 0.378903634389625 -0.160787444772661 0.685025775871824 0.729434606960089 0.717133952763525 -0.0992119416968672 0.625783932329177 0.714563799636774 0.401844436827044 -0.352838284936361 0.873134999700719 0.889982692057227 0.906052433704423 0.882252542815893 0.923549240982891 -0.811584474352731 -0.884847988614883 0.415418985314652 -0.911832729944955 -0.820764940965201 0.788341462046338 -0.146684110181366 -0.940055335789777 -0.79416961211494 0.823177314734389 -0.160052300911498 -0.952855362627741 -0.776801698265681 -0.421870978529476 -0.479346744675545 -0.242785098685984 -0.8645399556117 0.943036765290215 -0.421334230085052 -0.958133275496352 -0.0941518590250978 -0.963088009894642 -0.93205505762288 -0.324857155244841 0 -0.77096771339371 -0.993162722303814 -0.438692566077235 0.943721975883662 0.370721780166057 -0.955605825999919 -0.942232530927791 -0.987283445126219 -0.992075826633242 -0.992969086352575 -0.993198462042978 -0.991251039865289 -0.991583742299944 -0.991924711031981 -0.949052693211024 0.974389588099062 0.993226336465277 0.971058909194904 0.993283214958504 0.996076505952733 0.994369108227349 0.98811870247869 0.996266853213543 0.995634121905922 0.989995301292106 0.992300797788682 0.99102116786092 0.971260041493308 0.974351259919162 0.975996448616959 0.985129691883262 0.967840643274554 0.945308209687084 0.843636709072097 -0.758466870768267 -0.817433719196648 -0.960787495842211 -0.985725140937986 -0.983126070108811 -0.981499484858559 -0.983438248971528 -0.979883891562328 -0.981944009266629 -0.984636457533074 -0.987913066114753 -0.990322783675692 -0.98348272800016 -0.984670520007516 -0.985683851288771 -0.987864608078162 -0.98017350767808 -0.985334838512864 -0.98719282115064 -0.982126477397421 -0.972564384915451 -0.985460619713189 -0.985441892606608 -0.969867477140291 -0.960664394713894 -0.927557794542406 -0.950929619236455 -0.988009476370846 0.149316893000509 -0.89838964815665 -0.868485891167544 -0.873381872076124 0.986973838888863 0.982887787873325 -0.964182832205416 -0.880543948905318 -0.911966954101546 -0.879923765317925 -0.892388938845887 -0.926652448530362 -0.924705148252024 -0.887807531375199 -0.786742334487297 -0.782759354311406 -0.878516873006707 -0.940268489653957 -0.930580062905925 -0.937263020427303 -0.901310628257471 -0.930208535073269 -0.933810208631207 -0.822160949036603 0.330549306654021 0.284669818839986 -0.529563036071256 0.582214432218277 0.572696408563444 0.260169053871282 0.0933933279312503 0.724449833649169 0.747274224200635 0.86987934216464 0.865261975403802 0.961405895153137 0.978127387698872 0.992527162670331 0.988461461983336 0.788402432156106 -0.975319776330398 -0.979057048969809 -0.987633828384827 -0.978620700506151 -0.0571569824720735 -0.975015692991634 0.985964643775288 0.984141957444074 -0.974408383527906 -0.969562673314883 0.589216179513044 -0.684499495218857 -0.933692700092389 -0.913324633777508 -0.918141545288829 -0.963680645607028 -0.953815354851751 -0.975931633752424 -0.984494175400169 -0.984108382027128 -0.982409347177567 -0.975250303657472 -0.965240281776287 -0.98301201781483 -0.980241072833588 -0.960592261370291 -0.980811063360088 -0.983340810645761 -0.977614969015144 -0.961865863326933 -0.974045561405393 -0.976212777279989 -0.936225524109184 -0.96743765615268 -0.975860350232034 -0.969806855822947 -0.936210999886798 -0.947436597925289 -0.964903431843616 -0.732366561650533 -0.777044726846901 0.607463362251571 0.958524392539661 0.983565706594418 0.987522120942304 0.994434962059347 0.990983165878832 0.99286297708386 0.995291864805527 0.986902467462798 0.988897047417312 0.995038906323229 0.99245047594821 0.976388362365992 0.991469708598006 0.991817411129132 0.876603729861419 0.819139026841051 0.983988113406508 0.941527176599897 -0.9820303851603 -0.9801725383757 0.73789672940444 -0.671354178374566 -0.984790514307363 0.726794149798352 0.993468571194115 0.984947389340479 -0.43833440486277 0.975368028473923 0.993706127487954 0.983664400235719 0.546721708359299 0.939410338586066 -0.986830126097824 -0.982693226029531 0.95495113172562 0.614116283951748 0.985948310018472 0.97908167291495 0.0704073774460938 0.486954350025063 0.538411581653384 0.795266748017576 0.746752688947993 -0.783805110472539 -0.591946766359939 0.891110461632018 -0.380199135236384 -0.88648980302243 -0.519753839184324 0.567938926057511 0.223281636777842 0.376340575320348 0.427839801907401 0.160591471099536 0.833564792835299 0.803822446301863 -0.34987029138721 -0.093791568374986 0.670270219346176 0.103390026628589 -0.269354723509063 -0.672950287494756 -0.320181318215627 -0.258275928327927 0.789124814493829 0.669900642974666 0.528568052837918 0.254702897620942 0.0516143762678367 0.114688197842248 0.264440690689552 0.243063354495169 0.020090911398142 0.319374035647169 0.267733570804162 0.468728538101918 0.49340387381571 0.653180803078866 0.669345657669579 -0.311612660705178 -0.720420455413037
-0.910681596461297 -0.795838825911763 -0.936928585379753 -0.54488240756112 0.0561012610088157 -0.855328426373608 -0.876463390994693 0.733468262203975 -0.12858366111208 -0.942328443962512 -0.617378841604214 0.890673828136105 0.796522837781037 0.908028752511866 0.927977449146419 0.928881957181749 0.924471176824663 0.876181814214233 0.747449389024405 0.812355474187842 0.583639219239079 0.805572753969876 0.848888512557289 0.768659114255515 0.888854293003624 0.819934447190178 0.853795791496461 0.355068081676615 0.635005866421069 0.712568550872128 0.504820009587699 -0.476308935547252 0.813719356021009 0.859366155481712 0.879721150970416 0.838091897271252 0.894131147238111 -0.897116712986832 -0.930296008588106 -0.608818558065307 -0.96921105121015 -0.934251345777035 0.221476254927481 -0.788640827716129 -0.962575926958883 -0.855239532623032 0.705694145440269 -0.703348620378872 -0.951353373513907 -0.462284862832467 -0.62085721941738 -0.541792803982369 0.798915149622543 -0.777288469888891 0.794132013137144 0.446983532108225 -0.486149697761543 0.94337186764193 0.835515495198798 0.94343936831495 0.77042751489635 -0.77096771339371 0 -0.866553137931525 -0.136894513834344 0.646721291317361 0.918244213325761 -0.887122516043039 -0.901375033299852 -0.989960890281424 -0.993231961968355 -0.991116263209315 -0.992535204288502 -0.989188827021908 -0.988475469143996 -0.988164299531728 -0.870930144639568 0.982233705833205 0.994806643473586 0.987738033144373 0.994544204593195 0.996553293282383 0.99581635209697 0.992554046350771 0.996621285609944 0.996154959276636 0.988530844817296 0.992224843783917 0.992192046727874 0.968640023822709 0.955195990625257 0.95591577359586 0.980738014918126 0.784888833436413 -0.856713918035859 -0.968921558890493 -0.987107547026715 -0.988875679135203 -0.991673558776193 -0.992398112868837 -0.991430718090417 -0.991270818390684 -0.990344372363589 -0.987797881278397 -0.988506882384064 -0.990559548541875 -0.989510721059583 -0.99145262783266 -0.989118711988362 -0.989231480034048 -0.987303281512666 -0.990215516971082 -0.987033867473212 -0.98778789094222 -0.988403157407561 -0.987122111093943 -0.982210922251579 -0.987522725647701 -0.987964331568992 -0.981569031828542 -0.976681449522668 -0.959233000913287 -0.969556464533976 -0.990229838315111 -0.46138017933569 -0.923984278963452 -0.88206175109169 -0.932551674869069 0.984754545950194 0.977816346082908 -0.976427929969234 -0.943787550995783 -0.960023588794863 -0.954235842236886 -0.956156047502169 -0.964987507724721 -0.965695704850341 -0.956704294846932 -0.930351018565323 -0.930983791053563 -0.961686477454467 -0.978429506430551 -0.973439683419411 -0.97219453887232 -0.970296469255516 -0.978509307095359 -0.974764480085853 -0.966924938298664 -0.878021854579386 -0.918995658021421 -0.957403785265572 -0.767447344455708 -0.739493482051184 -0.897735760273291 -0.895582859376823 -0.529942589808791 -0.561708646383346 -0.0931702609612571 0.241370364659466 0.901679142260871 0.968382153112093 0.993084662880339 0.989944155147868 0.0357410225600537 -0.978522996658645 -0.980781542909657 -0.987519884000964 -0.981208944417418 -0.766308509752187 -0.980993150042567 0.979862102154009 0.980298419551764 -0.98161487886445 -0.980071205296137 -0.520097083027357 -0.897347965587451 -0.959059516714087 -0.952216696356926 -0.956274354280915 -0.97411923597455 -0.963836523604999 -0.980071054894676 -0.986399164382498 -0.984253412003489 -0.98257707287869 -0.979308417716185 -0.965186748766379 -0.981578082211856 -0.980181480803352 -0.962532425051671 -0.979306197020086 -0.98212321741061 -0.978076565530247 -0.961198991715322 -0.971975302477434 -0.976158692122037 -0.938855014560548 -0.966972719785721 -0.975214718485761 -0.971389971024033 -0.939865349217634 -0.945786194833751 -0.96832425743278 -0.76192923798642 -0.799537000600783 0.679230403761285 0.963877127100271 0.985999985475169 0.989468869180898 0.994415166082378 0.990227402110473 0.992627637123679 0.995199164790684 0.984931297695829 0.988238019297776 0.995014463356572 0.992401756769048 0.976354100630058 0.992138325789932 0.993063207414958 0.929857559542601 0.918213915609166 0.989678019030685 0.979570495541771 -0.964339486377727 -0.939469621655472 0.95015782390684 0.52358660974844 -0.962926907823299 0.910803373150016 0.994060652089875 0.98931770019581 0.594941649490652 0.982874016770743 0.994501097774587 0.987374351394335 0.901041878455434 0.970210214997871 -0.98208401020743 -0.977691859299045 0.967694914732072 0.918290527914034 0.989423659575842 0.986683038732451 0.887758549661056 0.935633934355939 0.928377489998498 0.958008734031998 0.962387284717327 0.737011763207492 0.843861103987431 0.977013426104563 0.911843475761358 0.375169122732556 0.891899859683775 0.961883364983076 0.950294380212569 0.949660657193632 0.955023450069903 0.935417233317098 0.95640565581735 0.954231616850459 0.87127769839842 0.915614393415574 0.930154016546977 0.835480225887923 0.816159055806513 0.521207963393059 0.713125158411281 0.685860810019161 0.935602440788057 0.921554225214776 0.842833788684081 0.783691389024806 0.52964888128274 0.515268564246264 0.668909099373801 0.631214826604989 0.199040441505526 0.548076974691477 0.549902702133529 0.622051562684123 0.590232305674858 0.733800044670686 0.762535078825294 -0.213706483509318 -0.694893071003721
-0.919633370810728 -0.789522584410974 -0.944672578083936 -0.737845194057677 -0.0964827218656149 -0.849359594759148 -0.915176940982566 0.640819919739907 -0.0112067947775359 -0.935522599337493 -0.727398426480012 0.900065319126574 0.777157221227811 0.917544546532281 0.957561743131735 0.94544523967035 0.93400925824109 0.874641024464436 0.834372501261403 0.896079616445005 0.532476043288337 0.852722408677348 0.904862376740218 0.832388521537273 0.903974496009078 0.879286146973988 0.914635682566763 0.569892088119202 0.755040511806043 0.838484389458008 0.703400265168953 -0.413960176838182 0.867516906423468 0.901347289020113 0.92819012274119 0.910462366012102 0.91881187651355 -0.905827149427869 -0.932941042033453 -0.608890829096132 -0.966406138458875 -0.931151132002701 0.239087030971934 -0.80539864932425 -0.964527969256281 -0.88436036044096 0.563377350204861 -0.804747359571696 -0.955404697765992 -0.759459814919222 -0.805944810308052 -0.87535218896159 -0.427425348010978 -0.888644794210464 0.225204321477038 -0.771145614586322 -0.874358483148374 -0.844739483995605 -0.915672825594263 0.290260094793858 -0.976799089431625 -0.993162722303814 -0.866553137931525 0 -0.778462718744054 0.881688542003825 0.946874566477825 -0.599510199228125 -0.908840564127559 -0.943643630390426 -0.990039330637793 -0.982306897442773 -0.98205406563196 -0.954704018708645 -0.97672541310698 -0.959874094310765 0.970476077981695 0.993104571337482 0.996038167850228 0.993267092565108 0.99525966091578 0.996471938211703 0.995970398425514 0.992264611677609 0.996307231152323 0.995422700833455 0.985338517028568 0.987568429946264 0.988618868122137 0.917320001559102 0.909950829189242 0.930524450618967 0.936219752885619 -0.561620440493851 -0.915995934835561 -0.966327978504157 -0.987319212715483 -0.988437573127282 -0.989827058628367 -0.989714074320948 -0.987913765670159 -0.988822574129692 -0.987782326280214 -0.984212585273476 -0.984754149981802 -0.98809252613718 -0.988240358705297 -0.99056377508919 -0.988450387577717 -0.988609230532352 -0.986805350596997 -0.98949191907825 -0.986665763748154 -0.986810682843666 -0.988218601619721 -0.987074233681383 -0.981483157253612 -0.987259085029127 -0.98799137326855 -0.982731776695574 -0.977622759688279 -0.960702416358667 -0.972083326056536 -0.989147741629386 -0.68897642308998 -0.939816580926077 -0.927344781550899 -0.947990530898244 0.98521413001583 0.978676868928233 -0.980871282483595 -0.945701465101475 -0.959005645344448 -0.953741747054537 -0.960278489722488 -0.966267086798261 -0.966372872014658 -0.959658688117175 -0.937896686488192 -0.938203519606424 -0.963741451758968 -0.979261576537828 -0.975465213951047 -0.976023869622749 -0.973138343625007 -0.980870180551252 -0.978978483750814 -0.972520045022466 -0.922895026623889 -0.961877539313384 -0.975445155486557 -0.898424761919652 -0.893969846665336 -0.96282091763364 -0.96276312542215 -0.855538708545529 -0.895897450979741 -0.895206808572311 -0.841693845966111 -0.053953238238982 0.90720816431661 0.98994262782275 0.979607266380175 -0.798547173509447 -0.979254679976243 -0.984276661530433 -0.984248289344415 -0.984832154603127 -0.925001163761081 -0.986055166549257 0.932464956014359 0.971647560487917 -0.981097490501274 -0.984086283890141 -0.88454057368285 -0.936325590656991 -0.968315713763123 -0.9669452822189 -0.969949095907931 -0.97981915965711 -0.973824225772533 -0.982779297633731 -0.987824720068042 -0.986557851384222 -0.985359830896149 -0.983509931447328 -0.973979736123982 -0.984493009406006 -0.984327033828645 -0.972939898732891 -0.981750440893248 -0.984510686165051 -0.981852656524576 -0.970914311750828 -0.977239318560027 -0.980104323496085 -0.963562389695665 -0.975848825472595 -0.980608935230513 -0.979025818824058 -0.963897028188725 -0.965505628399402 -0.977901284129888 -0.903809216802149 -0.91264956893388 -0.290836348198959 0.92239000233804 0.977566323776204 0.982026268136535 0.990915918417349 0.975057631846649 0.985154080492716 0.990950855377082 0.952298459444356 0.971944610306519 0.991061610527952 0.984403917323874 0.938699190647034 0.986298264477092 0.985576114684061 0.535633001887067 0.636059355611852 0.981238471938687 0.936736210994832 -0.972968779477607 -0.920141247039624 0.93495274790399 -0.471449936259991 -0.974814922893538 0.668096392210135 0.991795846636699 0.969609077316596 -0.762831393935224 0.972437657365529 0.992178198078756 0.974484132803539 0.568032802459726 0.946819772392188 -0.98171192026073 -0.971454636564644 0.964580113111058 0.855908019183589 0.986248874195816 0.981039848044664 0.773844360564939 0.890733318979668 0.850382890703246 0.928933772277654 0.94800720062888 0.614599913878899 0.521165942578937 0.967182945159002 0.893747402918846 0.0678599630584857 0.683860272923991 0.94335968770152 0.916588204041659 0.902951768753454 0.90490827834778 0.8689368700127 0.917880111634208 0.911003986900115 0.757938397776909 0.772280248490241 0.823017664311731 0.733683487098368 0.712432346633628 0.0379759525943682 0.338118983589747 0.546964310756704 0.924383684009916 0.88837865707342 0.766010597632968 0.704455175174479 0.471032492129278 0.580965920993064 0.710963665862468 0.69133834616511 0.430038901492983 0.685096351597258 0.681582155998777 0.735454476151247 0.706398821996736 0.790106383727127 0.83108528109293 0.171240598589443 -0.54594133541076
-0.904815841340268 -0.742328224985477 -0.933885143989088 -0.820434717782033 -0.287923467133583 -0.805977893778336 -0.925310984959861 -0.119079683825159 -0.23139968417201 -0.89775287777443 -0.870607355560611 0.611052241819289 0.282836923000302 0.613246973830029 0.846780702928732 0.846931461225396 0.793667909764262 0.722812210451749 0.697737410003969 0.680563937421339 0.383312709296825 0.833191812149493 0.88652577605758 0.822212200991427 0.926433553728815 0.923233357950474 0.929006010578274 0.829163459675045 0.897309581237479 0.910071376859208 0.866816933140752 0.645725094082262 0.935320118414157 0.938704107740535 0.955520935105157 0.948113812932173 0.958111027550015 -0.522568734059538 -0.82004772301088 0.800009117450736 -0.687444075008809 -0.0108285443992914 0.925763835253036 0.600806724752923 -0.84927203397178 0.267665001938052 0.921726958263192 0.536592621891294 -0.801177190868068 0.418481986207057 0.522074129620425 0.259762493129709 0.713166709507038 0.238022681071676 0.946346904987355 0.585786929885841 0.0776789374119625 0.575097777896779 -0.48869383926261 0.909466253776026 0.892882593429215 -0.438692566077235 -0.136894513834344 -0.778462718744054 0 -0.881749938397398 -0.970795681755084 -0.975448270163708 -0.988406747058107 -0.991691053009539 -0.993247323057244 -0.993666004200619 -0.992695264681036 -0.990658692029605 -0.992049062469607 -0.991525892193072 -0.895090502167105 0.981880852439732 0.994616795853627 0.982172504502555 0.993942874976874 0.996426456860425 0.994900512550226 0.986814959914124 0.99646593043846 0.995234303125609 0.986391185004453 0.986368583519123 0.985806524721872 0.819855482693201 0.904165558627852 0.929880816898351 0.857621511045082 -0.45245165538591 -0.707800902006198 -0.968377280816924 -0.988138323557945 -0.9864074132675 -0.987561899586258 -0.98851236690667 -0.98769212190653 -0.987402437834559 -0.984311842724559 -0.980222283382006 -0.982709182571851 -0.984572681485059 -0.983892593986642 -0.988350088288226 -0.983736215464353 -0.982398458134472 -0.980326131162979 -0.985765714077145 -0.977930516104594 -0.97930766831954 -0.983285099033766 -0.979441364835666 -0.963131021934725 -0.980695369499748 -0.982471278681933 -0.965945613454894 -0.948158364443292 -0.895187886187713 -0.940052696883312 -0.984342458925054 0.223155499450459 -0.881594318944647 -0.856434482814019 -0.861034052531094 0.987342181453439 0.983479929631414 -0.962740431978196 -0.869998381945221 -0.898708972804171 -0.889374141895156 -0.910302290587052 -0.927008339276927 -0.929523878701832 -0.915772110485676 -0.850422702215473 -0.826153262873077 -0.914264356905234 -0.962109665828695 -0.958038444423903 -0.959882779652871 -0.952057774792309 -0.968975401143613 -0.968050696173305 -0.953846450465444 -0.771832368037003 -0.883115626615476 -0.958747331448018 -0.709619831833554 -0.678452204586279 -0.931635066120694 -0.946948362532522 -0.628529481931953 -0.66914356546077 -0.781254958097877 -0.794202201234465 0.36669123579686 0.926962110046029 0.988613587289429 0.942256561832121 -0.926546121784707 -0.983738791072509 -0.987687629302991 -0.98688750681396 -0.987541246934946 -0.955217487308357 -0.986587826942836 0.961533513603973 0.974850388990909 -0.982932143614722 -0.982761335106015 -0.719932386159935 -0.909059815786529 -0.961183045584983 -0.955383379815273 -0.953612040078809 -0.97258413344455 -0.965500171837399 -0.978526472423258 -0.984854116451058 -0.983865499872196 -0.982632729331318 -0.977654654983021 -0.963249455169892 -0.981734965631703 -0.980364384027051 -0.959994473892233 -0.977533694756301 -0.981627608997277 -0.975873203170384 -0.957518566302662 -0.970887625210764 -0.974352663887955 -0.939948236875202 -0.966198338479913 -0.975744329949189 -0.971158536696149 -0.942134586861101 -0.950430776301986 -0.968590091044648 -0.809584651166437 -0.840309523299257 0.263922500889113 0.940327984489379 0.978848601111207 0.982509492392168 0.991758767515369 0.982354751089492 0.988357492941707 0.992371382501321 0.970932343491611 0.979335744718527 0.99212149014353 0.987055838757041 0.957034677123023 0.987021338039328 0.986358228944433 0.712286566620882 0.672598138302858 0.97844188818832 0.923364182788981 -0.974276563149003 -0.946482254916058 0.915479680288892 -0.439235152826242 -0.976311223802433 0.717906287058516 0.992008431081459 0.97080859604769 -0.754341854345355 0.972521713916926 0.992474815144494 0.975509380269958 0.524183487331353 0.944831034768181 -0.981450905272915 -0.971960283687142 0.959975896023948 0.877479675315418 0.985044502424819 0.976860412909088 0.695210932822315 0.853391844429305 0.794965536786691 0.898538413046034 0.926121442574617 0.46518594084548 0.250413423931822 0.947388240235017 0.831777452285623 -0.134843226594642 0.446764578555419 0.897797038038443 0.870021358060721 0.872623242469994 0.869417899384842 0.802812139249586 0.902960500255315 0.907354208669309 0.666558045566541 0.680774998906191 0.839614123283639 0.768437539792198 0.667136057648936 0.215857842215261 0.596084678741446 0.701029459828575 0.916942749707613 0.881630576600801 0.855174135484679 0.811649518006341 0.766602821926889 0.781646402362975 0.786317761473786 0.78649468451137 0.701017694050998 0.763467858232469 0.74692949653847 0.798465923378202 0.774005548328866 0.817800509729609 0.843191741937332 0.368123389461628 -0.400207921248176
-0.819114439980408 -0.476267161399411 -0.873757714414223 -0.340453055898712 0.452085645382547 -0.526921055080194 -0.821175437439412 0.686851096942615 0.455936237680048 -0.854266900958032 -0.573139715955329 0.802312453381036 0.666973337852985 0.887942963163203 0.912221163683694 0.884546116132319 0.879877902066464 0.813794600933845 0.647408446996627 0.646409036375338 0.403008364609495 0.768818594043624 0.829792945824136 0.755049528094262 0.901763486710867 0.871689388127198 0.882838730427477 0.679664072820127 0.809361089995818 0.832408563918388 0.751378120701302 0.289346990065981 0.895249165302093 0.908923401033702 0.928599161061093 0.910383133196053 0.937766242374599 -0.672316875912951 -0.855327811516188 0.556823537925246 -0.882686887310888 -0.678499926936869 0.852000102450627 0.0991939449359011 -0.902018666367915 -0.219484294366647 0.874702462068591 0.191040810147199 -0.857874869174831 0.271689177997139 0.266511425233147 0.426457919888907 0.86583984011581 0.089525147972792 0.91797903889505 0.771673690508455 0.241624191496085 0.874349209660476 0.753255417186418 0.966897017781697 0.932173566856657 0.943721975883662 0.646721291317361 0.881688542003825 -0.881749938397398 0 -0.843851911891142 -0.898847470181211 -0.943446592887459 -0.99222276346408 -0.99414906556822 -0.993767461207582 -0.994997579667294 -0.994403399902452 -0.993907702388685 -0.994528456381874 -0.990033151108877 -0.456191254767741 0.989041402768543 0.890613096840648 0.991173507244769 0.996297108318637 0.994449128959312 0.987495358558765 0.996638107586644 0.995657373314541 0.986402588686512 0.98526772269753 0.985499513509436 0.76436764194875 0.803584804616776 0.804036770412561 -0.7327733495848 -0.889842468725345 -0.939514198785244 -0.985292537499635 -0.989947876637718 -0.98752590270947 -0.989444319604328 -0.990645893239001 -0.9899603573006 -0.989208825560583 -0.987759919541092 -0.985307346171248 -0.98681624799523 -0.987770682601594 -0.986825804342608 -0.989958489406577 -0.985850958292981 -0.985603247981231 -0.984199201211304 -0.98808723037553 -0.98239437687801 -0.984153662045083 -0.986023432616786 -0.983310788419364 -0.974309552825928 -0.984456956419771 -0.985351671277994 -0.973752776527259 -0.96399129266344 -0.936460936854637 -0.958060788307472 -0.98813787753856 0.0551179554047524 -0.890305685288438 -0.821182141617518 -0.87708703933277 0.985515418388402 0.979739837540968 -0.961315027170305 -0.908603101829426 -0.930906758601415 -0.923631661063184 -0.928590162239954 -0.943680869269689 -0.943817106815721 -0.931923880344874 -0.890125382353995 -0.878531171816363 -0.932585306298574 -0.968095417821214 -0.963757131936469 -0.961413782234609 -0.959007182949198 -0.972509136195765 -0.963686020903562 -0.957811154353023 -0.865016972720414 -0.893056122840761 -0.959943357281697 -0.752218117253749 -0.716240393186683 -0.924800015359116 -0.942738586827969 -0.604859970895791 -0.53849095556839 -0.581392391514754 -0.607937068703089 0.539218662366323 0.945242254167737 0.985845766317715 0.779590850994246 -0.957694470708303 -0.986444184778507 -0.988744235054037 -0.988688507318164 -0.988551504591452 -0.97005301848215 -0.985754585620475 0.96955438247409 0.970910102277164 -0.986350724464563 -0.982364261733437 -0.62220355231923 -0.915753833701634 -0.960683069035948 -0.951270931762214 -0.947612944078723 -0.971182411578104 -0.962226097684437 -0.976335993177874 -0.984134417445562 -0.983208447363953 -0.980903793417693 -0.976743755831999 -0.961825910111707 -0.981239689678713 -0.979383802451493 -0.958085925760407 -0.977954467618195 -0.981554473277223 -0.976282469010344 -0.956850556954478 -0.97056367141038 -0.97473649245625 -0.932179878611897 -0.964776446859107 -0.974753456519953 -0.969963328100053 -0.935424876803281 -0.945688672803311 -0.967881097024118 -0.753567464666392 -0.790736498619596 0.628499961279612 0.95850693542103 0.983861729576912 0.986958790252319 0.993305497955397 0.987300521126328 0.991214673399682 0.994290739194747 0.979991950310481 0.984890004855927 0.994063721734186 0.990738208973032 0.969129508892332 0.990335390096686 0.991307987626248 0.886766797171979 0.860065665585839 0.986891062523987 0.971745998243596 -0.966789930067269 -0.935427227048767 0.94829425698508 0.415451069950243 -0.965196829259818 0.871450317810169 0.993681312068062 0.986128451646071 -0.162756890066691 0.980267094838937 0.994014696286839 0.983719909249477 0.850522698428715 0.965133806882455 -0.976544797556692 -0.971152950670387 0.963568736299271 0.956327376544482 0.989006567910698 0.984264564587812 0.908305995958477 0.939304598804053 0.922017242224554 0.954079240831614 0.961724675574035 0.828472479412381 0.807568717751556 0.971563127500554 0.924180241422617 0.481328810746614 0.839847695293878 0.949719527931091 0.939395033218142 0.941033319526634 0.933504276755753 0.895757639508772 0.945092666234906 0.942436426786839 0.784304284470336 0.849133026062962 0.907429143500069 0.799564702889754 0.729651056992258 0.390042487262535 0.6801090214883 0.674368267736011 0.918668253994782 0.898605265181573 0.856612009744055 0.801364465051714 0.691408198890048 0.682164443223194 0.72430297095461 0.710389555327614 0.529174865237189 0.659051914567235 0.648200946739735 0.712792379523789 0.68365280064927 0.770467520295783 0.791495447445303 0.0768477236808675 -0.553008134670112
-0.814728578111939 -0.367016940236518 -0.821240136835366 0.0748982845853359 0.681796594561437 -0.0934252674315187 -0.543449446176443 0.874469473641944 0.781216309160184 -0.524159656851872 0.617130276956514 0.909813556834445 0.870059569914655 0.94895113284709 0.962792953944622 0.945830017167037 0.949272893596197 0.917750364353657 0.855886602325093 0.90349608527283 0.749550918819809 0.882920698930454 0.909329530594772 0.872922734283131 0.931614806443233 0.902104343850792 0.922953574768868 0.74922503082741 0.830281715146588 0.863192674760998 0.794275736817839 0.0932963514532554 0.893778138676592 0.912799367479791 0.935502185364489 0.918355805536753 0.935246594193979 -0.840301247101403 -0.911037898362937 -0.179260660381629 -0.959667091782954 -0.90436441917364 0.705206240205031 -0.576862108653616 -0.95421685205136 -0.718405519037698 0.865671840074459 -0.370358178662669 -0.924053767017524 0.105405976516775 -0.0476900756557222 -0.171009035296013 0.763981110267421 -0.402159622077247 0.912119787307693 0.537340069498892 -0.33648266600853 0.877322997820683 0.883255303933498 0.919272843668317 -0.0990858851081409 0.370721780166057 0.918244213325761 0.946874566477825 -0.970795681755084 -0.843851911891142 0 -0.718755543084437 0.915145894300636 -0.930384102569814 -0.992236255123269 -0.986084670011626 -0.988820396444084 -0.986930572581037 -0.987797810607635 -0.986690910574684 -0.874725392084292 0.978036318898484 0.994689041362244 0.990002435795571 0.994177095572419 0.996229883411471 0.99565705787225 0.990744242718791 0.996030824494496 0.994604656500863 0.974260020186556 0.966936784377805 0.980556511525763 0.248776967304973 0.013801300955337 0.338080960154448 -0.932628004348194 -0.976689913398815 -0.980077070902297 -0.988424157252899 -0.992003515076779 -0.991495186569412 -0.991772849378193 -0.991173371019732 -0.990044525051735 -0.990486929185133 -0.989276124294414 -0.986409038370816 -0.986730966526062 -0.989222603440489 -0.988012602208867 -0.990423950742269 -0.988554927402094 -0.988679444923655 -0.986014537094246 -0.989334224817804 -0.986645245016137 -0.986281670203766 -0.987415381559793 -0.986664378460845 -0.981288878813059 -0.986680797108061 -0.987489226528665 -0.982324212088245 -0.97721221330339 -0.961509900860739 -0.971546725575243 -0.989397079717664 -0.62826237165933 -0.927342723107682 -0.882419613050481 -0.936326673090674 0.985083549004573 0.978817016419916 -0.976312927163628 -0.943065634551231 -0.9581317084094 -0.95454751554941 -0.958927016937208 -0.96560477586403 -0.964801717026599 -0.959421529041979 -0.94018108014884 -0.938295259965382 -0.962998576648743 -0.9803690280188 -0.977426788483872 -0.975800038747286 -0.97634240682397 -0.984372784787416 -0.978583110611615 -0.978365569839517 -0.958588761657179 -0.977687258302717 -0.986062142641009 -0.94403241333825 -0.943098077344011 -0.983200023670903 -0.983941957240383 -0.932289391657179 -0.950856581988327 -0.968633508705051 -0.955479304049404 -0.932647023078729 0.565794024943655 0.979292306278564 -0.631737319900058 -0.978960224832006 -0.988184861285673 -0.9907015112081 -0.988036980313671 -0.990558017839045 -0.980846864461915 -0.989386494401461 0.863652626547268 0.955171381058175 -0.987770161647187 -0.986804786892798 -0.920549817318525 -0.9534599350486 -0.972261048371552 -0.969676038525229 -0.969869603285363 -0.97961215690288 -0.972659873678088 -0.981114906785062 -0.986792239803621 -0.984897131786987 -0.983022906496747 -0.982082954173189 -0.969710981575621 -0.98285841356958 -0.982696296252609 -0.96877635856106 -0.979614641596867 -0.982890369301128 -0.980113868021878 -0.966373920033278 -0.97427287765193 -0.978370223106987 -0.956339657738829 -0.972512541961152 -0.978722618685105 -0.977115019655673 -0.958831633265838 -0.961427150180123 -0.977091671395782 -0.889023448116294 -0.897623065103338 0.0409379687327287 0.935060123774674 0.979765410933518 0.983273040292059 0.990244577951247 0.97250300850908 0.984973564528852 0.990854918149598 0.947556929129504 0.970157292440033 0.991171296829405 0.984735523864414 0.936702805263995 0.986690944942165 0.987725349429337 0.737932642024583 0.775124850671149 0.985460402740331 0.969395142557607 -0.954124486643087 -0.754293853479182 0.96522817769493 0.505497828138328 -0.946163809072223 0.806822096222058 0.992360402452505 0.978526945893957 -0.564760120976439 0.975007214208974 0.992834851347 0.977230817616276 0.810478576605989 0.962069764663702 -0.971225098713496 -0.962777759538117 0.964070737828246 0.963209432133276 0.988829346616024 0.984154888500742 0.930661819211427 0.949468552565042 0.931320701671756 0.959970876510613 0.966572368120778 0.891980064189871 0.859098868382603 0.971845052698519 0.942699609381145 0.733150147251793 0.867536627264874 0.955725913782511 0.941969969115947 0.94283345639117 0.930686941754382 0.909532258743828 0.946027776378484 0.948148827400247 0.864089881949452 0.879682818352463 0.910896534850147 0.860498064571278 0.831823253506609 0.536758055154446 0.740592524608537 0.777269775420709 0.939116765812779 0.918667851302933 0.857946596236778 0.823575513003105 0.717081082954505 0.736516123282059 0.786697105739252 0.776085134489529 0.578443834797717 0.73265277328058 0.730127368765312 0.770989445892096 0.735605558336984 0.804992158225832 0.837738567081329 0.236228025576954 -0.488666442794193
-0.71476854009641 -0.069752528124713 -0.762016722012598 -0.208572301594704 0.629991996503501 -0.0605393078213238 -0.743562310845017 0.714253365755809 0.681307797110808 -0.600878632633223 -0.427267120352348 0.736797378135412 0.490244823502725 0.72735472201109 0.876790103781984 0.825935194293218 0.784908062885792 0.517301904580105 0.470809081286281 0.611317305836004 -0.215221118016583 0.584530626437658 0.797484985645369 0.610723623041549 0.81118217528931 0.828377780981893 0.875299461768706 0.466173123968135 0.712023726694306 0.816689024537489 0.671599243916172 -0.206721121871472 0.871799794818499 0.903889955759366 0.929161272696533 0.914529871330077 0.920779306627135 -0.826382379377209 -0.902257336435792 -0.0755077098111242 -0.943511280119614 -0.896784742446914 0.469609406453473 -0.655473493993497 -0.957129914065171 -0.846744892480664 0.492797395651221 -0.754112579137322 -0.950296976758384 -0.770754020852157 -0.775400573617959 -0.87103404082508 -0.602949869581166 -0.855839829752321 0.317317017575948 -0.787428811518846 -0.864141814515692 -0.849861459915974 -0.91197801613466 -0.120489182189969 -0.904798773618123 -0.955605825999919 -0.887122516043039 -0.599510199228125 -0.975448270163708 -0.898847470181211 -0.718755543084437 0 -0.560638204823861 0.894890510677463 -0.991002293756981 -0.987673416190178 -0.984721795977132 -0.98223124123218 -0.987590755951167 -0.984868656954001 0.234282794281977 0.988128586787029 0.99556437903067 0.991643166030604 0.994696591390655 0.996457445589059 0.995577499398661 0.990219076690861 0.995975442207013 0.994026193191815 0.9787869542258 0.965241634400052 0.975851884133926 -0.22142879179714 0.206642121263957 0.463285794045867 -0.953234900902202 -0.977271144867344 -0.976448807173776 -0.989225277886432 -0.992483805611105 -0.991968338264238 -0.992048898939763 -0.991814647707031 -0.990767082654744 -0.991168422682448 -0.989538963625262 -0.986780957930035 -0.9873863919582 -0.989816337332961 -0.988867210797322 -0.991372442105121 -0.98974892248736 -0.988965641806765 -0.98715933864755 -0.990234092028477 -0.987274364525462 -0.986569273356324 -0.988484759861457 -0.987678329392789 -0.981257849711694 -0.987068245059766 -0.988255658794654 -0.983012507294285 -0.976568386104425 -0.960188921809635 -0.972681448965618 -0.988996222332068 -0.699848400749539 -0.939689391129711 -0.925878870821946 -0.942176132169744 0.984799787741236 0.978022827026367 -0.977909037557088 -0.944314415415926 -0.955320405369673 -0.949368587169268 -0.959107043823232 -0.966267971306391 -0.96440743336154 -0.958989723579265 -0.94449317849334 -0.941286782498156 -0.96294725960586 -0.979906387610202 -0.978671127254075 -0.978003157195055 -0.975633984369508 -0.98433385789926 -0.981463999097468 -0.979282775032961 -0.950554131476207 -0.975906659719886 -0.98636831208524 -0.938940935772936 -0.934024419382049 -0.983618278536362 -0.9845944417865 -0.924583649368188 -0.944812692099959 -0.972309309178564 -0.964075111180586 -0.949945039953775 -0.216221874817086 0.941696642803235 -0.896259257548241 -0.979934114294487 -0.988326631857344 -0.991091213776678 -0.987665172118706 -0.991210274263635 -0.983141487230666 -0.990631637444281 0.692198969766684 0.94977438181539 -0.98784790358521 -0.988135225404906 -0.939073130920014 -0.960506295815412 -0.977522720998563 -0.975934321690273 -0.976320485259935 -0.983869166821462 -0.979368759094069 -0.985225511217858 -0.989174627352331 -0.987806649634825 -0.986721132016452 -0.985659619358743 -0.976846133045058 -0.985675666664516 -0.985913502037188 -0.976034421493919 -0.982844145790286 -0.985507350954447 -0.98334021290648 -0.973788882069264 -0.979263081455591 -0.981834472701379 -0.968754434416934 -0.978373901887711 -0.982766068557306 -0.981513892049721 -0.969165069894039 -0.97112099347062 -0.981056220255522 -0.929035588084816 -0.932166780799449 -0.644166464361699 0.860691001925473 0.967122778230698 0.972158806648216 0.985964173455715 0.943726510722541 0.974750215708519 0.98561416732666 0.86863014248115 0.940367419719143 0.986386091016302 0.97420897931212 0.858672316772097 0.978205984277375 0.976793996957296 -0.237393427089735 -0.0357017564579103 0.971456731740889 0.893044579999116 -0.974611112654977 -0.90032030035877 0.936530374704382 -0.573201944424169 -0.973857835735159 0.282875215379567 0.990199052611245 0.938205198021658 -0.897157293523573 0.964354077466516 0.991315735363858 0.963185037803741 0.429256267637702 0.95206987212117 -0.976972918543666 -0.961736216382743 0.965131321766491 0.955305554499677 0.986850731156994 0.979394556676714 0.888463539610874 0.926525562103967 0.883970996089981 0.937610234928757 0.953214257854839 0.812585644428335 0.572060991616348 0.951074574514606 0.899221799780936 0.28164050378206 0.4121163738756 0.893927751636934 0.842442044752422 0.836602429783691 0.765443647018716 0.619034759834277 0.838141049115407 0.80273553434528 0.218547482453771 0.221437030455856 0.567696816059795 0.381203765362815 0.257608574343961 -0.447607241269051 -0.200429428640711 0.0611249330293349 0.846757391294559 0.761985400761714 0.599857345162294 0.486750643842503 0.298205968757266 0.467160461509474 0.613094239145269 0.591607959282798 0.462672226618793 0.661856105390225 0.652831416777985 0.712423755794661 0.695902239685944 0.779751653608244 0.819630469266792 0.278441741446974 -0.412851101001864
-0.0184179152304525 0.542958429405416 -0.0672714263168416 0.57322212085959 0.749614686934656 0.367511154249222 -0.42958711780215 0.65634351687883 0.530976603793604 -0.67140181081069 -0.706607545568192 0.0265627179827833 -0.319526215933933 -0.0405367491979702 0.106994969025905 -0.181424383078482 -0.278618194120548 -0.708469814086766 -0.777538584761009 -0.769928292889304 -0.868158746730808 -0.756585465444716 -0.520041973632516 -0.703155075354307 -0.419735214758261 -0.278334341298477 -0.0621087471061037 -0.732790008349627 -0.482315231688171 -0.163483534456533 -0.538087706680124 -0.8184173881518 0.454953658655934 0.701404230658317 0.740117172446672 0.662196715659338 0.744459352598401 -0.89238867122654 -0.918724481779227 -0.597524278921159 -0.949273871511077 -0.929668117251294 -0.575606209889039 -0.849642522543699 -0.960896867090941 -0.920622593908319 -0.650045162380618 -0.887247854019903 -0.961024396275782 -0.916662016886915 -0.910380059372914 -0.910417382700406 -0.866853815071495 -0.936762690525804 -0.68335801799605 -0.875573605375443 -0.935463170326629 -0.928641805920577 -0.929644313459187 -0.77156807394922 -0.921412669971645 -0.942232530927791 -0.901375033299852 -0.908840564127559 -0.988406747058107 -0.943446592887459 0.915145894300636 -0.560638204823861 0 -0.527168794847123 -0.986398216218319 -0.993519301546245 -0.995361733669408 -0.994974906604926 -0.994653617003787 -0.994844785202083 -0.989539821322287 0.121331362092663 0.990687566821831 0.948431829505528 0.993019665523344 0.996619061364356 0.994191930028578 0.988013531280479 0.995910835424288 0.99388868241535 0.982541600961909 0.962658289622837 0.965507379967195 0.357613222243537 0.511172215688762 -0.0937996279425718 -0.964727537238767 -0.932888140792211 -0.956745915609314 -0.987464335791356 -0.989352001235092 -0.986637313476543 -0.990014765323435 -0.990921912066336 -0.989391362754966 -0.989538212164633 -0.989006841118567 -0.986428278241025 -0.987230009268428 -0.989078778478747 -0.988388670143924 -0.990807230324186 -0.988128161077797 -0.987754162798328 -0.986525223715973 -0.98953731308977 -0.985736753269676 -0.986227698348261 -0.987970258047903 -0.986329283091517 -0.980120981327136 -0.986600208199532 -0.987406154824518 -0.980297941298204 -0.974402745420905 -0.961047995946203 -0.970799228145292 -0.988614910542771 -0.683896745489219 -0.936283726715224 -0.918328485728259 -0.931667051694011 0.980359360340613 0.967254139801109 -0.97154977013901 -0.944097523398073 -0.955348973250346 -0.946578709285769 -0.950114619371377 -0.96188686002528 -0.960697204327288 -0.949839138890953 -0.929631795653966 -0.929709140496805 -0.953454527455294 -0.972632993398956 -0.969766581269164 -0.9671525114326 -0.962871079637298 -0.973893464132796 -0.962366666279494 -0.958677264950627 -0.888680174106723 -0.897189799537882 -0.96145225787937 -0.721009539147439 -0.639922879891331 -0.906277980964635 -0.926684878759375 -0.146854595090848 0.337919608153177 0.378409030267654 0.272457626996369 0.796449287597304 0.955783332677315 0.973761200288825 -0.602204170401903 -0.962003643340299 -0.986735444958032 -0.989501061635427 -0.986048991725797 -0.989784678362862 -0.97896865464812 -0.986952278868487 0.954629236513979 0.966981439658011 -0.986826356760444 -0.983461826782046 -0.714525031934647 -0.92583410630055 -0.965185986547496 -0.958325180105686 -0.959302259183871 -0.977729819782846 -0.970383011582855 -0.97985174739318 -0.986744045224036 -0.985896776212623 -0.983879590156432 -0.982126652201864 -0.97279150048876 -0.984188476038915 -0.983625398708273 -0.971707502723446 -0.981838669288652 -0.98442598822714 -0.981460533347454 -0.971061322103623 -0.977989846570497 -0.98037327509249 -0.963138229649756 -0.976620977053055 -0.98167856405824 -0.979354814277742 -0.964830153274193 -0.969026806377096 -0.979058604517413 -0.911753933453183 -0.91794184472286 -0.519261604535829 0.879665017562175 0.967043444159314 0.972560811175328 0.987328988948763 0.961473874436108 0.980253590504995 0.988507468868825 0.921213553698894 0.954353949322301 0.988169235244086 0.978969942576462 0.889324936418438 0.97971463890926 0.979432007066694 0.0316660898495882 0.0495916399327471 0.970306462868625 0.901566806178116 -0.975416705929605 -0.943138289857861 0.914174194438262 -0.357977698734937 -0.971582200477359 0.618468688863803 0.992218188569706 0.97419965041168 -0.737360611352519 0.977031143641552 0.99338761933561 0.980767439941856 0.868730652698962 0.974850498698402 -0.961549669371944 -0.944031860973585 0.977176645310216 0.980498636453476 0.990982461724709 0.986246662941926 0.946171670272232 0.959808610971425 0.949165716333234 0.962627589930322 0.965071283329703 0.898171284749912 0.815350394049833 0.957755793008589 0.905991735049847 0.365944092362773 0.495657666229153 0.845075461546175 0.746604191677917 0.763860240065476 0.464036932860354 -0.0754346256726021 0.662512742382099 0.241459497352526 -0.715905164151124 -0.625839940763348 -0.210564589482907 -0.645470295522721 -0.718927904131464 -0.832443080057649 -0.797199487824243 -0.805790093864599 0.0682766415254914 -0.140834690594946 -0.413929714352544 -0.594316671742445 -0.688540653597761 -0.614256866962944 -0.395522996033686 -0.462071876762236 -0.488272666647332 -0.17163857490408 -0.167457516006506 -0.0326166070246517 0.054934091474827 0.416018408204666 0.47330648816658 -0.455699795919187 -0.711789044584486
0.971055373806884 0.97826184953143 0.977328369134483 0.983327857969705 0.979318512212189 0.976745442362334 0.970657367273463 0.980514595887612 0.973268273810203 0.945317313033645 0.947707416122125 0.944909731841616 0.928332968854064 0.925589971568699 0.896755673086115 0.863083235161357 0.839759510074823 -0.140574779033746 -0.485048541572718 -0.13312409203797 -0.796365342511245 -0.802249245029852 -0.437605955108492 -0.666045991969486 -0.741545076565237 -0.747265665371904 -0.446882227326764 -0.882573159090433 -0.877963671270544 -0.769388823154846 -0.841203164951676 -0.941958213121321 -0.695598164849885 -0.110981357881191 -0.102802115556378 -0.381296898571492 -0.363606090738566 -0.963685238797671 -0.965940873783244 -0.95222520502384 -0.984995398099479 -0.981021822647107 -0.955982507905703 -0.973151161238196 -0.985945721013646 -0.978744551449353 -0.958547544699999 -0.979091592374894 -0.986324120233619 -0.975735026355471 -0.97994939966736 -0.982324760072801 -0.970424688828993 -0.981281801505753 -0.977704717792557 -0.977326164122328 -0.976883365206132 -0.980375470320442 -0.985242454384227 -0.971254068986104 -0.976420481314149 -0.987283445126219 -0.989960890281424 -0.943643630390426 -0.991691053009539 -0.99222276346408 -0.930384102569814 0.894890510677463 -0.527168794847123 0 0.299736739033153 -0.907930786520727 -0.996169030827782 -0.995304932964011 -0.992647076813781 -0.994287532032754 -0.992749704264773 0.761570159130948 0.995540078803147 0.991188716391735 0.995401551600151 0.996947553860187 0.996064684330921 0.989674981020402 0.994214864713915 0.990433876672084 0.0795641756741932 -0.957335899088202 -0.889432354518097 -0.989932306765957 -0.98930262159622 -0.991630583612848 -0.995207793093749 -0.994630516562999 -0.994707314327768 -0.994973088634945 -0.994536253330196 -0.99441681309772 -0.994823555742635 -0.994322049838808 -0.993441638941322 -0.993821575092552 -0.993563559004671 -0.992187868829171 -0.992395539078545 -0.993200184327877 -0.992227101854891 -0.993440073924601 -0.992448205924489 -0.992153173563848 -0.991231015174913 -0.992877932149574 -0.991322851223675 -0.990960935763377 -0.991465131592936 -0.991417581765753 -0.989052387535709 -0.990809733539363 -0.991300528558887 -0.989205838645661 -0.987247107758504 -0.982647816492962 -0.984324315843509 -0.991879090828752 -0.943299973907594 -0.972340536921332 -0.964779441981751 -0.975161514155818 0.955057289380591 0.791538438997398 -0.986177278304498 -0.980891176239476 -0.983968126723861 -0.982435157537507 -0.983117145716789 -0.985441059678231 -0.985402358693961 -0.983851215679217 -0.981086784113624 -0.981491222420223 -0.986070167436345 -0.989473511959294 -0.988691265442815 -0.987282801874703 -0.988022206139018 -0.990884884936078 -0.988009158192234 -0.989099266418686 -0.985707983752308 -0.989840003320582 -0.993003483974911 -0.984278645636377 -0.982347561623768 -0.991897310493243 -0.992095628321148 -0.982977664052561 -0.983924955355115 -0.986504101894537 -0.984618120727359 -0.987344199716149 -0.971557951536936 -0.978405639190918 -0.993091755492766 -0.993276694397682 -0.99288946818563 -0.993579488879792 -0.990493137313286 -0.993483854202811 -0.989868682330976 -0.992193805031751 -0.0260433294633427 0.781216322933901 -0.991527451220696 -0.990622921789918 -0.973780837736607 -0.980502809482545 -0.984686285426611 -0.983892469162489 -0.985040590015172 -0.988424537521674 -0.984486930542098 -0.988724108650998 -0.991507435362539 -0.990020389158573 -0.988698701654572 -0.989263200339188 -0.983499126825086 -0.987618694534218 -0.988431860988479 -0.982571031369048 -0.985748524963158 -0.987179035696071 -0.986807322040657 -0.979402850366692 -0.981503170478335 -0.984363861548104 -0.974352678133935 -0.980792980016102 -0.983491952232944 -0.982873582852355 -0.972508917345227 -0.972764900803653 -0.982104874665854 -0.934588074418206 -0.935951898888958 -0.611111070689119 0.888836849258729 0.971878763562419 0.977550870805564 0.988408289009665 0.95948237102078 0.979781897207044 0.988945792380761 0.912966073961371 0.955917085959557 0.989185643705609 0.981015340034422 0.898888313435301 0.983254895414357 0.983946110468807 0.250923138512662 0.500036541724966 0.980828170632571 0.949947683214628 -0.969467538515091 -0.893191463314423 0.94495424998117 -0.0190235884130403 -0.957202598840933 0.813974603314274 0.993147830603622 0.982462481552694 -0.301711260640408 0.981984313528936 0.993885123360826 0.983856316836492 0.942842702898937 0.982306079201719 -0.942953812909533 -0.924449593459485 0.984847452480581 0.990795914408502 0.993820397892126 0.992759660506484 0.985551762844191 0.988061943569115 0.984934371770593 0.988330155869488 0.988908363995571 0.977761201772294 0.965348386796432 0.985985802506207 0.977571185550137 0.903005958433391 0.918119188095003 0.968850815724647 0.94836631698426 0.916892435206471 0.852935818886529 0.752572783923501 0.860510787365916 0.378448907953688 -0.369457147281032 0.064162561990526 -0.114056190799194 -0.701869958284406 -0.510754718142077 -0.782972283561371 -0.858663231548683 -0.864407505698281 0.329555589565821 0.296432672688293 -0.50669355733576 -0.625568062215965 -0.838835552557414 -0.792388816448358 -0.439230786131673 -0.586788795174874 -0.713404503984189 -0.323864038727324 -0.201502308761789 -0.255059651540585 -0.188506527941361 0.384666137999282 0.459869459763764 -0.574070321090674 -0.743581301463466
0.171728775922123 0.0472695796172073 -0.859938709954797 -0.445361400329317 0.436508432852404 -0.81206982147843 -0.958811879051761 -0.78640226811971 -0.73656764262768 -0.963730898157769 -0.969932153382297 -0.928559031052734 -0.950898500630485 -0.965844299108881 -0.952498218699346 -0.940788944040298 -0.958338289357577 -0.975713717001208 -0.966166652850245 -0.958564147391814 -0.978345339520241 -0.973470364279494 -0.949913019185569 -0.965532776188556 -0.971638370971424 -0.957292140594543 -0.936982735494938 -0.972990759510526 -0.968753198900351 -0.943176521918583 -0.959988276364018 -0.977760882749337 -0.933628089128379 -0.811350500609579 -0.864712208142191 -0.898214262413151 -0.930110452289984 -0.979924000241113 -0.979580927091923 -0.981570996189641 -0.990544179732191 -0.990055127989333 -0.98478967370969 -0.986682431998918 -0.991269140327186 -0.989722268249354 -0.984554378976164 -0.988957173345743 -0.991698559997215 -0.988884592684706 -0.988943948457261 -0.990749033620467 -0.989450597238126 -0.989673183717079 -0.989086608635925 -0.990471562398232 -0.990315484598496 -0.989972776470863 -0.991389977995303 -0.990413822919929 -0.990962746819626 -0.992075826633242 -0.993231961968355 -0.990039330637793 -0.993247323057244 -0.99414906556822 -0.992236255123269 -0.991002293756981 -0.986398216218319 0.299736739033153 0 -0.0123270896374643 -0.990971064131372 -0.992295874743423 -0.99006801305583 -0.991367002254629 -0.979726949690431 0.985122177988292 0.997286039606916 0.997166577593575 0.99660703715334 0.997131025730435 0.996878236220736 0.99202369333707 0.987279914668321 0.988338515557535 0.693635317711333 -0.920194257464057 -0.742967279628761 -0.988686166317685 -0.987599501372957 -0.990301119813784 -0.995651329978701 -0.995382295036902 -0.995086041554826 -0.995510203926516 -0.995520309000323 -0.995285196644498 -0.995425191353279 -0.995303387446465 -0.994832667754093 -0.994865105471018 -0.994931034269136 -0.994662242636544 -0.994605630410753 -0.994660917598768 -0.994184009276476 -0.995081605760283 -0.99453843221063 -0.994162674047144 -0.994077204967489 -0.994809772705574 -0.993936227266509 -0.993767889577208 -0.994202274522889 -0.994187374334878 -0.993089277913598 -0.993825697154504 -0.994120492854382 -0.993265755691338 -0.992570927313287 -0.991757334461592 -0.991870234369778 -0.994220619452377 -0.985828406036485 -0.988122079900043 -0.986235721130933 -0.987927585363907 0.492858359469997 -0.802220731184228 -0.99101908341829 -0.988919414959165 -0.989775819268806 -0.988427560800704 -0.989818292478954 -0.991115115407543 -0.990314743818136 -0.98970654669269 -0.990008143394275 -0.990169976464752 -0.990893068174072 -0.992377761225874 -0.992601670121817 -0.992166352767031 -0.991615052492277 -0.993531608205179 -0.992753562515329 -0.993059579511324 -0.99085453901349 -0.993667041726486 -0.994996898256597 -0.990625813621539 -0.98930015673015 -0.994376976620428 -0.994371032788017 -0.988444236445632 -0.987933570112982 -0.990636965195659 -0.991783907913781 -0.992006952934024 -0.991487605962526 -0.9934044301137 -0.99578616784505 -0.995592840481368 -0.995508472315971 -0.995669995132772 -0.994417456145826 -0.995568119408016 -0.99447371320556 -0.995087235944037 -0.983143312468537 -0.942521264688469 -0.994527548864187 -0.994434204974321 -0.991049937368121 -0.991955113657663 -0.993516249180411 -0.993223817187338 -0.993288769570559 -0.994299006111333 -0.993670295080295 -0.994258193286838 -0.994906370462732 -0.994579998510174 -0.994252938073656 -0.994413371663913 -0.993036661283662 -0.993686036296145 -0.994218201381485 -0.992646365412723 -0.992785034789401 -0.993243814847063 -0.993389102272163 -0.991337565728447 -0.991503986934816 -0.992249318695665 -0.990452140231547 -0.991183173047096 -0.991639266693388 -0.991549720112659 -0.989191209027996 -0.989272107972778 -0.991445249046406 -0.983021667659805 -0.981240996192573 -0.966204384833494 -0.79244624112999 0.686358895399737 0.775909852902608 0.925141709053165 -0.730165549089019 0.450810756834388 0.80684380791252 -0.925732526068696 -0.766667801923329 0.869403887185294 -0.0953932778265993 -0.922271178283762 0.667712626289933 0.00652917392431554 -0.976335503084173 -0.965344129076538 -0.0312617665387149 -0.924967077420876 -0.990750048411289 -0.983321121283535 -0.906207574395605 -0.980247240920946 -0.991431763321639 -0.978027534816455 0.952778918314643 -0.873794009541792 -0.986172875204763 -0.625954537661323 0.978117740347943 -0.598880609497794 -0.957593871093145 -0.527328442940788 -0.99059376731039 -0.98773395470904 0.879008622304209 0.967914236780401 0.985258330918556 0.980001423836244 0.889538182494386 0.803231953048748 -0.293409761788629 0.692734700395927 0.762139631185801 -0.861763683327969 -0.942054016884954 -0.503223556459505 -0.850243298887357 -0.968877641809071 -0.97168322539652 -0.933206557523308 -0.959669175256587 -0.967392437606748 -0.967198069965511 -0.967271287793405 -0.963734004454671 -0.974248014396628 -0.975313387949727 -0.976218550654029 -0.976852713804431 -0.975509989849854 -0.972313075777842 -0.979956683733269 -0.981251593923558 -0.978033318313155 -0.943160509390158 -0.952571394921485 -0.967013353233788 -0.968107333288029 -0.973285434985614 -0.966423749628669 -0.943916467583959 -0.947404137119959 -0.938802015289817 -0.878584675739827 -0.858131925283355 -0.848040467318818 -0.767708566308191 -0.40997986809521 -0.313153860864653 -0.796503681976083 -0.829192017549522
0.982444579802184 0.982127674909085 0.983871197719029 0.982729063676485 0.974383376537777 0.969040871104688 0.939913612301113 0.918114254110232 0.915995152220408 0.743776300247536 -0.248712017187567 -0.581930795818212 -0.421871741015276 -0.650786837618754 -0.883058389585342 -0.897126554892923 -0.858399041291062 -0.955806918759886 -0.96925464811101 -0.956414369599889 -0.970642727207248 -0.977256204512363 -0.968782444364883 -0.968176651056044 -0.972481762316184 -0.974172747776435 -0.964233242706899 -0.976413229273154 -0.977065553610568 -0.971575518471614 -0.974578666389673 -0.982046912590439 -0.96556904264574 -0.941279520756488 -0.945721978709665 -0.943589940636872 -0.948534594877097 -0.983770425026866 -0.981771893498093 -0.980371822274579 -0.988790100533278 -0.986059528139891 -0.980282054282079 -0.985339234568709 -0.988840274109269 -0.985625454040902 -0.983226718284558 -0.987511417504231 -0.988368913121759 -0.985914416319159 -0.988630840900226 -0.987773599671923 -0.983274378158901 -0.988976721954101 -0.988315005230971 -0.985108450409272 -0.986393733263564 -0.990898896151586 -0.990604448902088 -0.981712637437175 -0.989571169893639 -0.992969086352575 -0.991116263209315 -0.982306897442773 -0.993666004200619 -0.993767461207582 -0.986084670011626 -0.987673416190178 -0.993519301546245 -0.907930786520727 -0.0123270896374643 0 -0.694232036475602 -0.389675077619807 -0.522242899239791 -0.711137649218111 0.994822169129038 0.99664761207784 0.997338526022984 0.99704451953492 0.997052472571458 0.997080278675776 0.996074362103995 0.976453810125702 0.982119025624609 0.979708347155302 -0.675268198099017 -0.973593856395551 -0.955989615959449 -0.989116801388932 -0.988631229509807 -0.990895007440234 -0.994681641362649 -0.994354140152185 -0.994616933159159 -0.994953060889926 -0.99422641703721 -0.994297109154796 -0.994842735766759 -0.993861825386396 -0.992429187847379 -0.993603464282608 -0.993319134328254 -0.99096795841837 -0.99136889866326 -0.992711530182133 -0.991545518552025 -0.992688432801639 -0.992074056629229 -0.991982339989084 -0.990568468772365 -0.992194754121724 -0.991347976837784 -0.990668761518072 -0.990680732228777 -0.991080336704182 -0.989411199573066 -0.990449375962919 -0.990602915818246 -0.989530873301103 -0.988166132174746 -0.983455189965799 -0.984642151259805 -0.991615165215022 -0.967405326212441 -0.982251061486005 -0.980917340274042 -0.984123299553228 0.87677572899168 -0.254659308037644 -0.990212188527466 -0.985892735892112 -0.988199712248177 -0.987046528882206 -0.987076165093316 -0.988446073557912 -0.988950797480119 -0.987237877522763 -0.984536489054986 -0.985786513887083 -0.989106191159776 -0.990804015120649 -0.989157343781097 -0.988421897507738 -0.989566660747168 -0.991328379498199 -0.987557977589218 -0.989174734692305 -0.986355342700704 -0.989830992347164 -0.991774826816893 -0.983341629203775 -0.981529746896428 -0.989471419897022 -0.989349930036803 -0.978022607736464 -0.972720239418818 -0.959943926793391 -0.948334193971228 -0.971738078145997 -0.938570958888656 -0.98329421697919 -0.992265439082144 -0.990661308998911 -0.990589402907757 -0.991265698033614 -0.979335666086068 -0.9902468561353 -0.983576536986753 -0.989445247741139 -0.238650019854084 0.897410376148389 -0.988797811643926 -0.988653229262846 -0.966369385013062 -0.976516067591988 -0.981634130336043 -0.981278981438914 -0.985672081942816 -0.988643934664627 -0.983258321963577 -0.988182810931361 -0.991478698271774 -0.989736015720663 -0.988138215559613 -0.988864778570922 -0.983586896864986 -0.986509509824357 -0.987692677212291 -0.983500729733234 -0.984946797206092 -0.986074883397543 -0.986510173322373 -0.981287487774548 -0.981745526030241 -0.984000871017634 -0.979185956891512 -0.983021664051241 -0.984464518473317 -0.984472113135251 -0.979950705220368 -0.97953496546778 -0.984468225473972 -0.965901397269781 -0.968673304755147 -0.935189482380241 -0.1656765589443 0.859561344688097 0.892507132764652 0.949937581633554 -0.190475464580866 0.724073494683618 0.904995731952963 -0.691429729558621 -0.107471777621968 0.925636056470322 0.817098948790459 -0.441985810160829 0.889611034517076 0.829540218891289 -0.884933596948379 -0.826191185874107 0.865124329136532 0.209925897849483 -0.974472938807038 -0.907654640987299 0.851977519341685 -0.721943494227188 -0.960043238997636 0.304013630322566 0.988333548487351 0.938240048480834 -0.651265105484479 0.978568380706948 0.992426092417674 0.982103191265305 0.961601548013967 0.98723326189172 -0.574820909047298 0.543435380802608 0.992106387378484 0.994136502832442 0.994221903570397 0.993484198947751 0.988832530816877 0.989611356030935 0.986483282823334 0.987281111527859 0.987103137912254 0.977188506172962 0.948155620472583 0.971115694935297 0.960901159417516 0.80844517365073 0.408415132916927 0.791902350516666 0.551264522649889 0.00140202624120435 -0.736180127996335 -0.831063394394953 -0.719465641389885 -0.9338087130097 -0.951929807033212 -0.929385584514117 -0.941420453724197 -0.961951715740061 -0.951720888622794 -0.95731612212959 -0.968302645573119 -0.972430731580749 -0.926191049525527 -0.912013375657035 -0.946323508199614 -0.952625008352608 -0.966828482240019 -0.964756173657852 -0.940483909025981 -0.948979428810301 -0.951099598115249 -0.917329010767827 -0.901934740635682 -0.911179984240648 -0.892676183402399 -0.748104623120912 -0.687664993732665 -0.897221551816205 -0.900429851608347
0.993449243394746 0.993094775170313 0.993817576944282 0.992903346608876 0.990469593441842 0.989928467779484 0.984594982638202 0.978391033958452 0.979912482574432 0.966830830331525 0.876693617447637 0.78836477424536 0.857409071181138 0.597455722435219 -0.554934769322237 -0.480808885712059 -0.240805296357526 -0.919919552584507 -0.95084451208923 -0.910077322694192 -0.951871849005863 -0.972385053765215 -0.958763228732746 -0.952912002024603 -0.967566272757444 -0.974150005410568 -0.958917365492349 -0.972014027754408 -0.978151324024465 -0.973907678994208 -0.972697705800781 -0.981652058829221 -0.973459982740542 -0.956932698147429 -0.954459713897154 -0.95277588224752 -0.956786161240823 -0.985166385267464 -0.984405294989152 -0.982038989622488 -0.989233554530218 -0.985980803841684 -0.980537406541266 -0.986759223209392 -0.989399047050339 -0.98520950585463 -0.984427832845145 -0.989066880074013 -0.988711432519765 -0.985511116239366 -0.989537106747347 -0.989344993852682 -0.983504680989321 -0.988804773994659 -0.990135284169716 -0.986884167335588 -0.985248127484276 -0.990824690937884 -0.991783327592161 -0.983214032889059 -0.987870526567275 -0.993198462042978 -0.992535204288502 -0.98205406563196 -0.992695264681036 -0.994997579667294 -0.988820396444084 -0.984721795977132 -0.995361733669408 -0.996169030827782 -0.990971064131372 -0.694232036475602 0 -0.624415716929424 0.00251967560957114 -0.938737406554715 0.991891650553447 0.996957499871178 0.997176589174178 0.996313420241259 0.996257752482387 0.996249247716924 0.917733914392045 -0.992903050140559 -0.985904509032495 -0.960643199162672 -0.990424622296818 -0.993530863324649 -0.993260793542716 -0.995551574531012 -0.995247429424889 -0.995426232803256 -0.996125106281881 -0.996051696850223 -0.996073908253868 -0.995830845098071 -0.995319577825763 -0.995498010711622 -0.995584089734856 -0.994628398296717 -0.993966464989526 -0.994699752579566 -0.994079156591934 -0.992080802564795 -0.992873522620634 -0.993594308855977 -0.991936927856113 -0.992987533963045 -0.992857050947054 -0.992418257095859 -0.990570869241516 -0.992566347126954 -0.991896940214571 -0.990509856069094 -0.990421447878536 -0.991447173105088 -0.989682351476815 -0.989959731825403 -0.990488792715029 -0.989992722714942 -0.988225127098229 -0.982994471207093 -0.984648835343127 -0.991428813647657 -0.971550514202292 -0.984365183987885 -0.983940885354234 -0.986671910744748 0.496766528787 -0.86571554482521 -0.991576570173479 -0.989279929204456 -0.990688389431447 -0.990559476900686 -0.990406834530472 -0.990834935132372 -0.991584585156086 -0.990965235485995 -0.989164091578845 -0.989744005973114 -0.99209231186326 -0.993111860438629 -0.992097591806639 -0.991481320177888 -0.992644857052564 -0.99366515387984 -0.991764731102478 -0.992805901765118 -0.992174123308151 -0.993719680390364 -0.994460068339232 -0.991877542127637 -0.991526177899948 -0.993800881336358 -0.993764495462991 -0.991656422055167 -0.99109472679218 -0.989187329715036 -0.987965841270141 -0.992260898985558 -0.990682285157462 -0.995154899036764 -0.995583007513275 -0.994490682253427 -0.992849699665395 -0.993251800831395 -0.984311295655156 -0.992281112201353 -0.988639967915124 -0.991469123249838 -0.926766167315594 0.0435838150108215 -0.991160402453867 -0.99113201950126 -0.984284453626383 -0.98626093036134 -0.986820382606505 -0.987090274834204 -0.989947818910254 -0.990694681898418 -0.98600745633372 -0.990381497905693 -0.992491653689938 -0.990033095225079 -0.9885432384373 -0.989898818015178 -0.983577408244186 -0.985247252466093 -0.987311266945357 -0.982825332366146 -0.982661585020287 -0.983682203935378 -0.985225333321503 -0.977884586293963 -0.976443903631292 -0.980628112301723 -0.974449951477155 -0.978132158141845 -0.979806745694028 -0.980539581283006 -0.97406242558188 -0.971022954476534 -0.978885161690085 -0.952209449611486 -0.958528005548361 -0.901376098868264 0.422672139577627 0.912427488055924 0.933322043985274 0.965048173020851 0.452567349241259 0.849110790842242 0.936975626115173 -0.161323432979185 0.552021310462237 0.948524942787405 0.903565598205781 0.370382850479782 0.934248923202916 0.903485022972884 -0.700195770635602 -0.435985128944383 0.924966712195845 0.691244903248871 -0.95752410681177 -0.732315837190567 0.915970043997259 -0.219396008183088 -0.902183291579813 0.8581405982355 0.990793432364363 0.970479730888527 0.545027027130844 0.986585425458974 0.993684537816278 0.988546761228865 0.982966069161978 0.991373130882673 0.607458013279193 0.916756024903788 0.994018789080577 0.995798936838078 0.995509944730687 0.995347431831688 0.993642163588348 0.994046013987714 0.992844928943406 0.992673640985358 0.99282324977221 0.989756659215544 0.980570436154046 0.986834620674935 0.984853995819755 0.956260714338121 0.898881016996667 0.953020917573237 0.921839618665262 0.748657551807801 0.0233493039864183 -0.212935814543211 -0.0808701533200492 -0.891021811150819 -0.902013520601443 -0.803584453370692 -0.898711141316206 -0.944549037175558 -0.903675022482187 -0.91480613532368 -0.953930619400544 -0.962008025957654 -0.861505579622467 -0.7878059472354 -0.907605246560755 -0.915036682970319 -0.95268056005615 -0.95208286519557 -0.90381609358749 -0.923739064323959 -0.940564579234737 -0.895996790542426 -0.860802127189316 -0.893628923796034 -0.888537334859008 -0.711294696034005 -0.621188785291893 -0.890679596223363 -0.893128947156908
0.995794913247272 0.995754681694974 0.996141606864877 0.995726629626189 0.995000020407012 0.995187643263403 0.994196739900402 0.992095631961372 0.992857429190946 0.992172337730681 0.985786683320517 0.978776977451999 0.9847684291058 0.979929327384522 0.939480720271841 0.938421450042903 0.962575996113674 0.762398275060188 -0.320053247076436 0.660513837371641 0.175953506614422 -0.831460134247843 -0.66830286547803 -0.267994348423885 -0.692263509378158 -0.906385598957809 -0.713569980605441 -0.83697247477338 -0.929838343106182 -0.924804272112429 -0.896078746891054 -0.95053345955233 -0.926463322233976 -0.865966165097761 -0.776429337846308 -0.729616101602995 -0.705283952468017 -0.973749528819753 -0.974912099339581 -0.95150549458078 -0.97842757933069 -0.954435624065542 -0.910513855544591 -0.969801972296284 -0.977150729801661 -0.945171223291318 -0.953785912265336 -0.977131900237889 -0.969646189538967 -0.952067962425619 -0.979704224916174 -0.975796978856857 -0.924706931818776 -0.976372476373438 -0.981655385632071 -0.9610132439192 -0.954231114130867 -0.98484808126378 -0.986628590925472 -0.93844007653039 -0.976133025117443 -0.991251039865289 -0.989188827021908 -0.954704018708645 -0.990658692029605 -0.994403399902452 -0.986930572581037 -0.98223124123218 -0.994974906604926 -0.995304932964011 -0.992295874743423 -0.389675077619807 -0.624415716929424 0 -0.387593776949317 -0.33831892230827 0.995369346719088 0.996901567726111 0.997075860922858 0.993949223925364 0.941768516560544 0.981919932334815 -0.972838636474768 -0.995660276672398 -0.994579063336768 -0.991908962560423 -0.994418434943516 -0.995017357321259 -0.994441016710556 -0.995752134093294 -0.995551273541582 -0.995437702330308 -0.995777663909748 -0.995521516678936 -0.995720524919751 -0.995337609434595 -0.994341974761251 -0.994596739065028 -0.994888224888348 -0.993001724756649 -0.991385567764686 -0.993088406958943 -0.991896185255798 -0.986258861163247 -0.988525073808662 -0.99042689165745 -0.984721969908731 -0.986870411862862 -0.988023666996945 -0.987368978159358 -0.977023302130525 -0.98545545665392 -0.985271734855614 -0.978471316967177 -0.97510095130891 -0.981630897391746 -0.97593763674299 -0.975355260227858 -0.977852872934397 -0.977864942853807 -0.969896227718865 -0.914771524681912 -0.941892748968518 -0.982663680981088 -0.745755182421636 -0.958190327870773 -0.958329247047869 -0.972662057166493 0.955121450748744 0.598530340072009 -0.987800125376852 -0.980966959417456 -0.985340820168107 -0.987010298925677 -0.98559094948003 -0.984892605526406 -0.988160467587913 -0.987639202389826 -0.981204328319533 -0.982317831726326 -0.989236501146144 -0.991469412046807 -0.989038478005717 -0.988232139496342 -0.991140420353939 -0.992045932160627 -0.988258421472288 -0.990655519508817 -0.991121760961266 -0.992252083106377 -0.992432295134088 -0.990493536532623 -0.990993808865357 -0.9918291000751 -0.991818885818195 -0.991192669467031 -0.990537677682279 -0.987080919359461 -0.985404901967891 -0.991383376997695 -0.990165438660892 -0.994657994754567 -0.994476566464579 -0.99186253271955 -0.988208861982308 -0.990049139797117 -0.959002430147593 -0.988665902496493 -0.982935078344412 -0.987700958293547 -0.883863682227631 0.704710501457702 -0.986252507244726 -0.986168583153953 -0.970026197205969 -0.971474365029674 -0.963704951325609 -0.966384771137738 -0.978605475841567 -0.977153886222883 -0.936743734051309 -0.972730091272013 -0.983588078549704 -0.968478457959157 -0.957922817818231 -0.967687655145878 -0.897645448977301 -0.942055935728036 -0.952408437960411 -0.903958858596543 -0.920736067977163 -0.936422410695382 -0.942232016382294 -0.855268460357207 -0.853741308921066 -0.915973130162663 -0.811853585399314 -0.880328252520867 -0.916927690757215 -0.92279188838891 -0.857794678911161 -0.811081017555765 -0.910688221920842 -0.589613305837484 -0.806310217262339 0.104273932280835 0.934573550849506 0.973289736211767 0.977164250346842 0.983714533499536 0.923662254921386 0.961616857520225 0.978761279880065 0.902990056572376 0.942247100732749 0.981965250486895 0.976477385118316 0.942713236215589 0.979737589303348 0.980264546088355 0.90244549846909 0.919768340144208 0.983775588854917 0.977647701285839 0.480704316150036 0.959161960466353 0.987240215539409 0.964396015991179 0.921647986384658 0.984129396120071 0.994423757537566 0.990105459513741 0.974813867798485 0.993345167863093 0.995265554451317 0.993447223570556 0.992379383411797 0.994364523648466 0.971829128739056 0.982200437077446 0.994966003198111 0.996251032930231 0.99612252457331 0.996093268707973 0.995370396045803 0.995727255262716 0.99536940934403 0.995182704867347 0.995458688562325 0.994810773279441 0.992775971294941 0.994200234039443 0.994120332120108 0.99138524887405 0.987629806033527 0.990337239827398 0.989170117267252 0.98387755094567 0.968787457882192 0.963088738077962 0.969880453094947 0.893551590372915 0.843052049609154 0.931784971595321 0.888587032339504 0.476556701546602 0.816107647551555 0.834403554474119 0.457476155588875 -0.271157635722662 0.820673680414856 0.901295318789369 0.766298470774802 0.725369004594166 -0.0516564148345542 -0.306527975239242 0.46766180641276 0.206778386565459 -0.500398715052473 -0.0569273478340859 0.249576914454348 -0.128062007753585 -0.394764957645736 0.281851380247781 0.509520994358793 -0.587542378039116 -0.740401359545558
0.996091050789955 0.99613690218304 0.99592662716022 0.995014082320114 0.994999822355255 0.994965446497101 0.991794615504429 0.989444086327166 0.992239464078388 0.989468205880341 0.973186986583658 0.967205434548204 0.979132211738368 0.958770813942971 0.794844175679467 0.864857374923688 0.923825839419681 -0.34889992749766 -0.84551968265307 -0.134922203021305 -0.760389833065925 -0.943929878586532 -0.898651670490952 -0.833298109126615 -0.927256475286564 -0.960503269682247 -0.913827831909581 -0.947411566101323 -0.969295011173535 -0.964515653484258 -0.957159336148334 -0.975269616611467 -0.967489507337652 -0.946931167568337 -0.9359116162234 -0.930137929077784 -0.930993062063155 -0.98367003072154 -0.983098411662429 -0.976156205400918 -0.985382940124668 -0.977912669478039 -0.967604856992945 -0.981069856528547 -0.984037947811504 -0.973671070118617 -0.975600988428156 -0.983623034366251 -0.979486239264591 -0.97436448068995 -0.984891520869746 -0.981507556314831 -0.964899888062473 -0.983674277116199 -0.985749298552532 -0.975282033528391 -0.974995045603932 -0.987555052568633 -0.987404833607088 -0.971309152305152 -0.984605952559382 -0.991583742299944 -0.988475469143996 -0.97672541310698 -0.992049062469607 -0.993907702388685 -0.987797810607635 -0.987590755951167 -0.994653617003787 -0.992647076813781 -0.99006801305583 -0.522242899239791 0.00251967560957114 -0.387593776949317 0 -0.776651734627724 0.714920021197018 0.992667039991805 0.995761488189347 0.918180695770523 -0.991703644928985 -0.970822627499101 -0.988330050536472 -0.995268417252703 -0.995515699384777 -0.995341740786349 -0.995594653093856 -0.996045718574593 -0.995496924441791 -0.995306232173658 -0.995358910519268 -0.995328666628767 -0.994936420418493 -0.994217572108786 -0.994768125824292 -0.994371076487564 -0.992818230885024 -0.993103864377984 -0.993777759464536 -0.99163482355721 -0.989743972793097 -0.991488387854441 -0.990899492504094 -0.986191646425368 -0.987770752137904 -0.989175570705418 -0.984648938400059 -0.985143100284264 -0.98665594537094 -0.987118776205843 -0.979647700652714 -0.984333595527417 -0.985369933455297 -0.981842565099701 -0.978827910684354 -0.982373886738927 -0.980706060273566 -0.980610981228571 -0.980733026215933 -0.981253845365923 -0.978704203832588 -0.963411870844337 -0.967412240064345 -0.984984860987719 -0.935900188505628 -0.972674382864773 -0.971439472756263 -0.980063590819702 0.660525794815352 -0.841167106473045 -0.988914781974042 -0.984646999785633 -0.987518025318037 -0.98902833446712 -0.987356507741901 -0.986412338593497 -0.989158468610952 -0.988793336124757 -0.984481888862852 -0.985342421608496 -0.989477866395938 -0.991120009941678 -0.988856307518429 -0.988342219594391 -0.990663208268009 -0.990705199408013 -0.987169479986873 -0.989597597303885 -0.991003004447849 -0.990592597868565 -0.990023216366841 -0.989877734438587 -0.99061115065087 -0.989768061298346 -0.989761518866459 -0.99046726678105 -0.989472323240562 -0.985975979053845 -0.984630878108028 -0.989995717507306 -0.989162436608833 -0.993159907149509 -0.992646683705373 -0.989302127965758 -0.985206370343479 -0.987111362918727 -0.96253938761239 -0.986096438295209 -0.984175205381389 -0.985563350233951 -0.957419324860637 -0.820780774735491 -0.986153250244114 -0.984696974498688 -0.975738550644682 -0.976695351580876 -0.970366557244499 -0.971321316216307 -0.978883287409554 -0.97688162821479 -0.956024837412865 -0.972540113448245 -0.981041158311104 -0.970231941374676 -0.962736974542703 -0.970777316991397 -0.944015399372922 -0.957293292928444 -0.962702084499263 -0.944655359375101 -0.948703617633023 -0.952647663565989 -0.959407316261169 -0.931930026274052 -0.920687959000778 -0.946835366559998 -0.917530485619463 -0.936321519656287 -0.946758995705116 -0.951713438318759 -0.927847693757504 -0.903465885773233 -0.946031606833466 -0.83606924647908 -0.89691323661821 -0.468644820368899 0.900919773320531 0.968129984685384 0.974407802335513 0.980781728678434 0.860429515627766 0.942093503708729 0.968748863549599 0.779131048850907 0.901866916158924 0.975792649651778 0.964127976892972 0.896852026173098 0.973325354540493 0.970350940721712 0.775327175658903 0.860695725186481 0.977135873128113 0.960461958701275 -0.0747961844015977 0.918713930016591 0.974007884009444 0.905139069129946 0.801466700596562 0.963610316307727 0.990700452721952 0.981085042124929 0.940963987150075 0.987632991308358 0.992703952961093 0.987870658997688 0.986304403694021 0.989967033752082 0.934731310627682 0.961142809448367 0.992689013931426 0.995081579941835 0.995157509116851 0.995301240210538 0.994749543885403 0.994822758310455 0.993568533918467 0.99378586856454 0.994595635194167 0.992877809193919 0.988677069603095 0.992146914404452 0.992259798933406 0.984808036178739 0.974786692069197 0.985532042421004 0.982384474175332 0.962361669591997 0.918608311228313 0.922480261046311 0.925822554644618 0.285182938654189 0.329580770498465 0.824472826803222 0.390837615335282 -0.640014267584988 0.345765850162396 0.357066336018824 -0.665560056226967 -0.845711651980998 0.435361712684241 0.774393024135529 0.0402661929160652 0.0107916080539584 -0.794625718581963 -0.835535465733928 -0.328757055016423 -0.58648882380057 -0.84637621415394 -0.63423280923916 -0.362198350084097 -0.661351636138312 -0.740885064271658 -0.165178174039159 0.136520288078324 -0.785091337763325 -0.827094507407878
[truncated: 1,114,069 more chars]
